# Supplementary material for: Derivation of haploid embryonic stem cells from mouse embryos
Source: Springer Nature journal article supplement (doi:10.1038/nature10448), 2011-09-07
Supplement: 41586_2011_BFnature10448_MOESM12_ESM.pdf [file 41586_2011_BFnature10448_MOESM12_ESM.pdf]

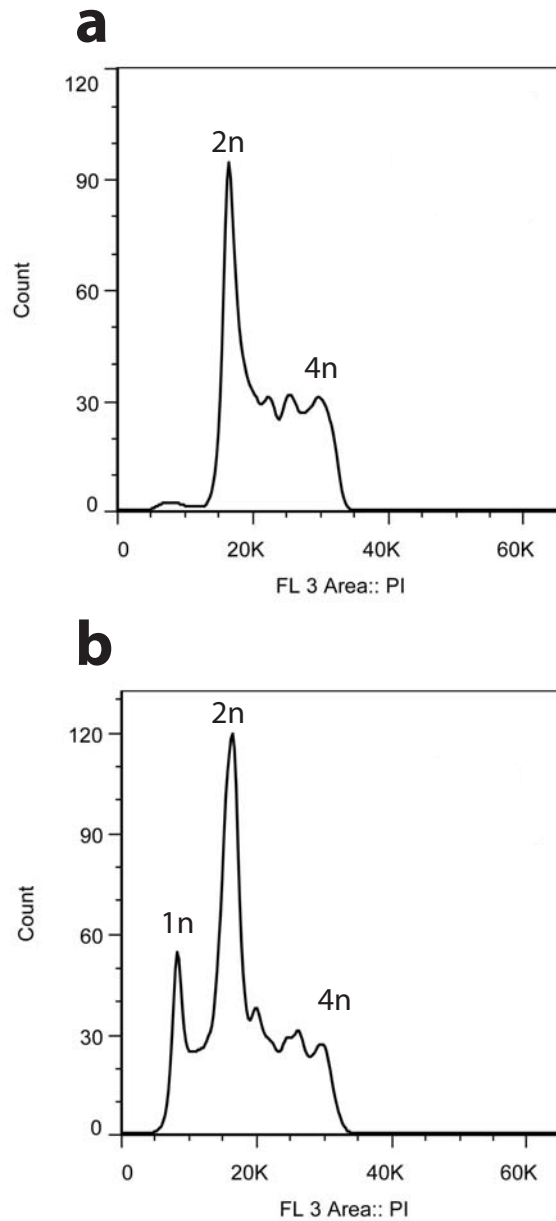

### Supplementary Figure 1 - Derivation of CBA/B6 hybrid haploid ES cells in KSR

**(a)** A flow profile of DNA content after PI staining recorded from diploid control shows a 2n and 4n peak.  
**(b)** A flow profile of DNA content of an ES cell line (HAP-9, p8) derived from haploid blastocysts using Knockout Serum Replacement shows an additional 1n peak.

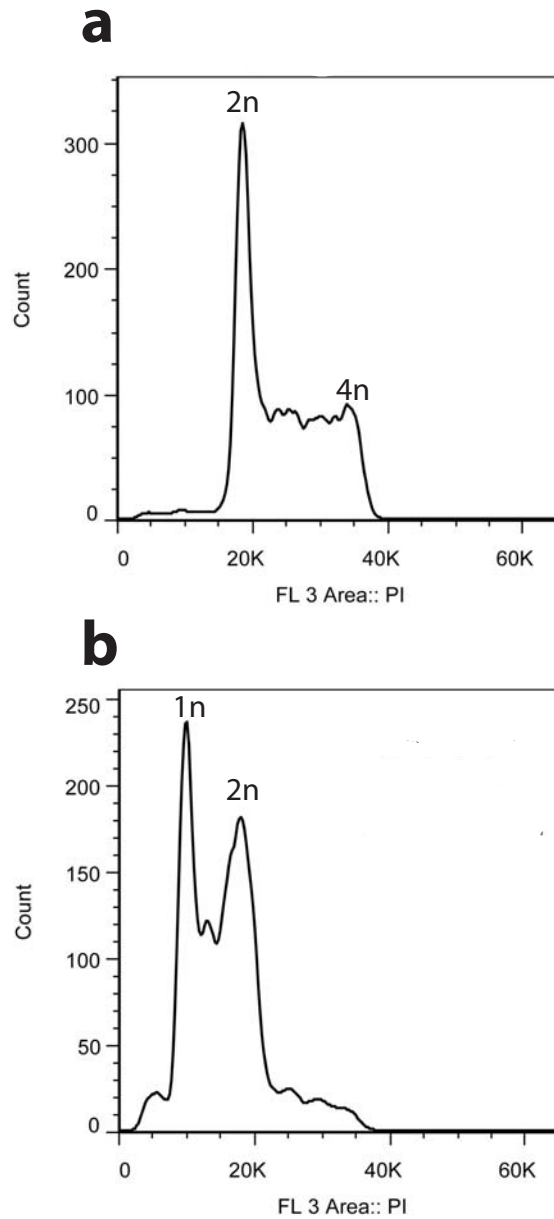

### Supplementary Figure 2 - Derivation of haploid ES cells from a mixed genetic background in 2i medium

**(a)** A flow profile shows the DNA content of a diploid control ES cell line after PI staining.

**(b)** A flow profile of a haploid ES cell line (HTG-1, p8) derived from blastocysts with a mixed genetic background shows a nearly pure haploid cell population with 1n and 2n peaks but no 4n peak.

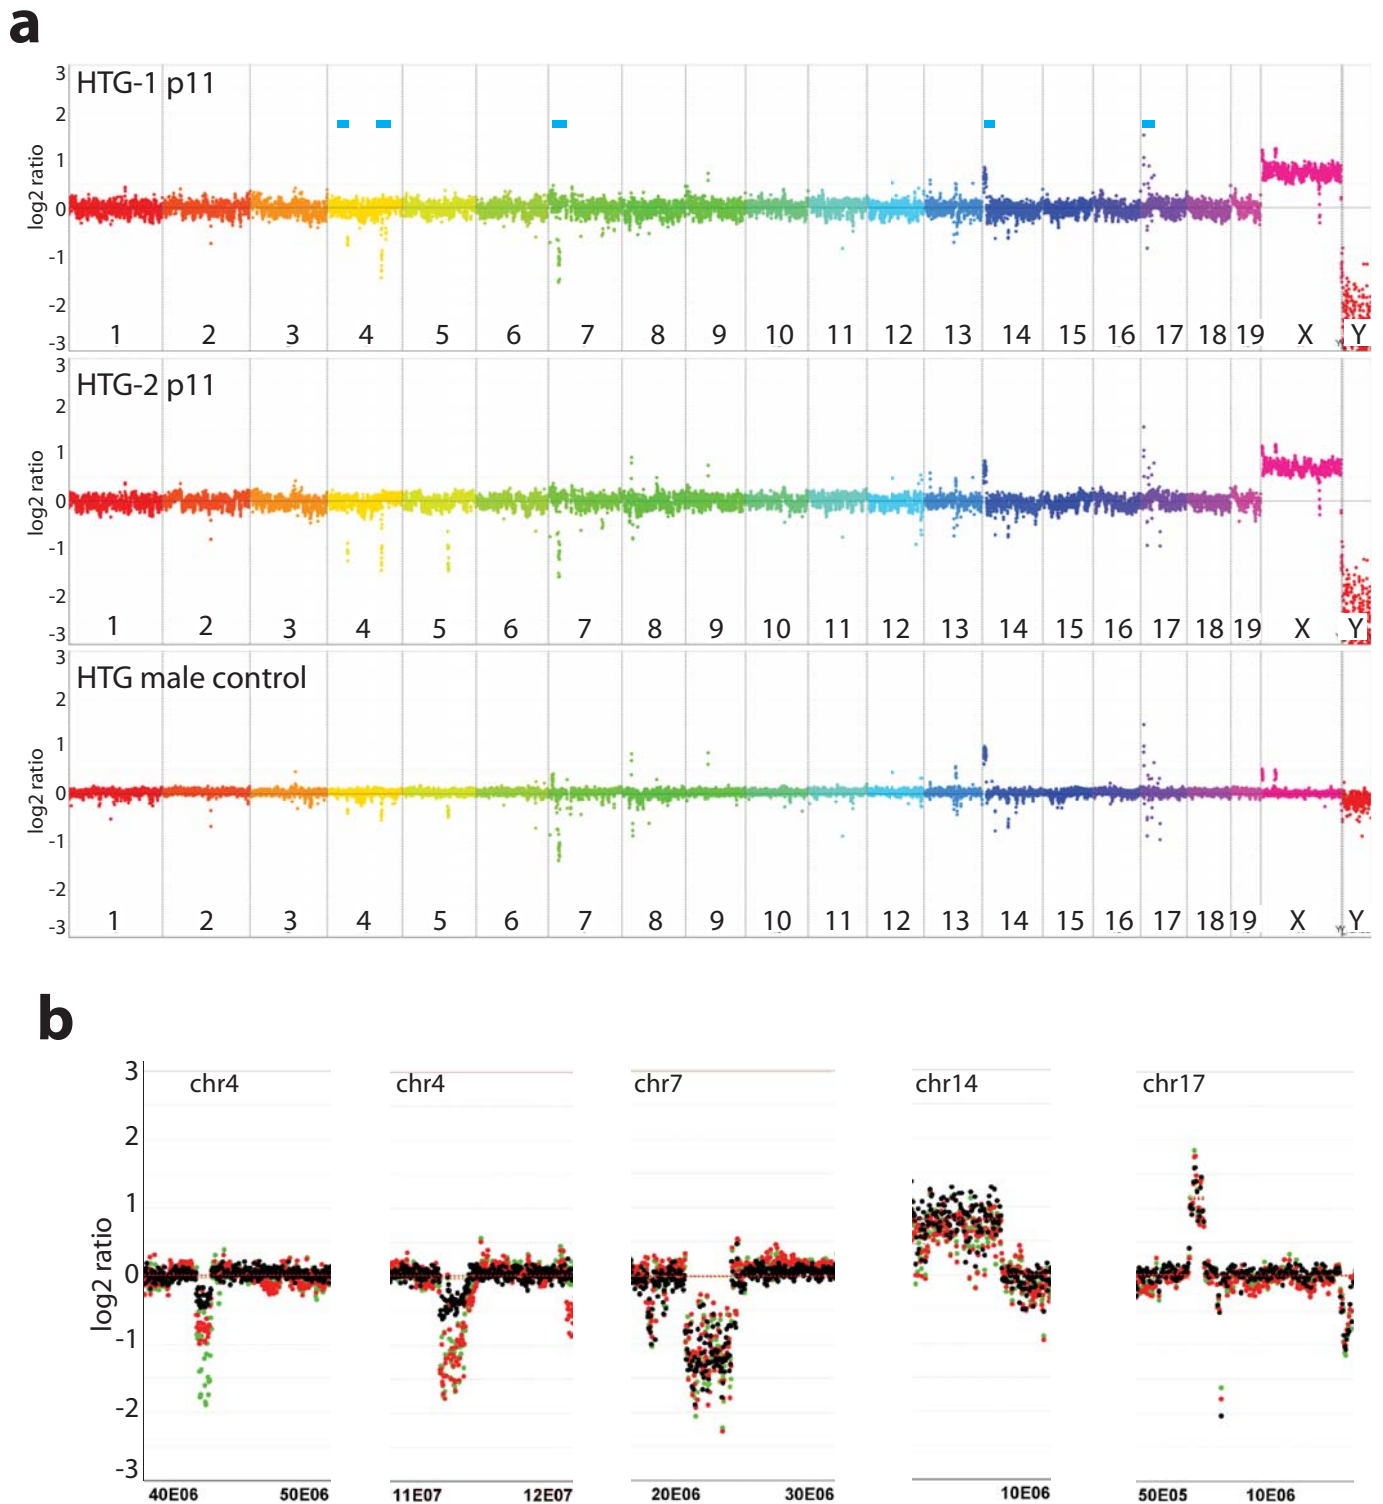

### Supplementary Figure 3 - CGH analysis of HTG haploid ES cells.

(a) Genomic overview of copy number variations (CNVs) in 200kb resolution in HTG-1 and HTG-2 haploid ES cells and control male kidney DNA from the mixed strain background of which the ES cells were derived. Average values of log<sub>2</sub> ratios are plotted using somatic C57BL6 DNA as a reference. Blue bars on top indicate the positions of regions enlarged in panel b.

(b) Zoom in views of regions with CNVs on chromosomes 4, 7, 14 and X are shown. Signals from somatic kidney DNA from HTG genetic background mouse strain (black), HTG-1 (green) and HTG-2 (red) ES cells are overlaid and shown at 40 kb resolution. The positions of CNVs overlap indicating they are likely resulting from genomic variation between the strain of origin and C57BL6 mouse strains.

**Supplementary Figure 4 - CGH analysis of haploid ES cells**

CGH profiles of HAP-1, HAP-2, HTG-1 and HTG-2 haploid mouse ES cells are shown along genomic coordinates. Kidney DNA from a CBA male mouse and from a male of the transgenic mixed background strain from which HTG ES cells were derived were analysed as controls. All hybridizations were performed using a C57BL6 male DNA reference. Average values of log<sub>2</sub> ratios are plotted at a 40 kb resolution.

chr1:CBA control kidney

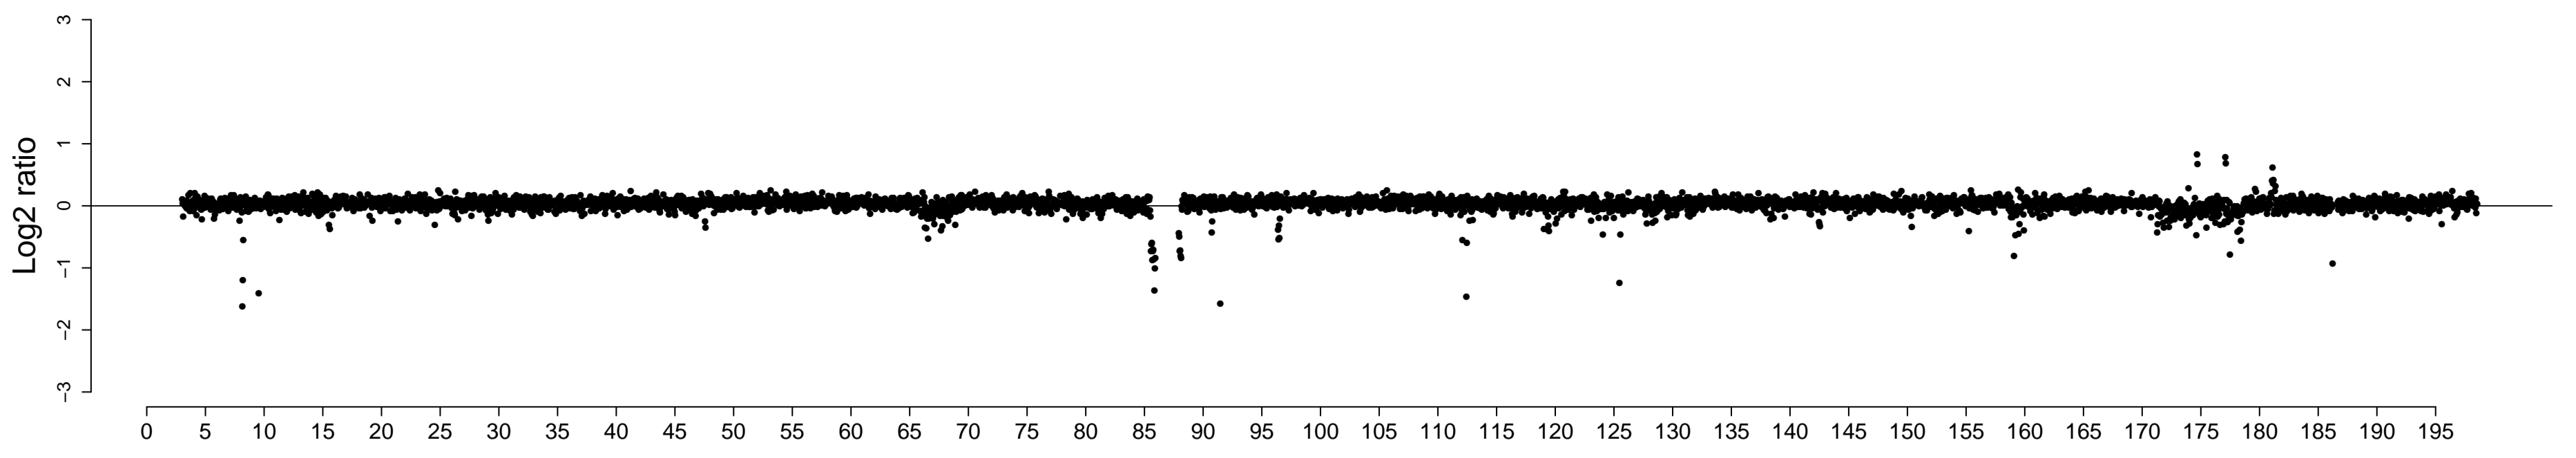

chr1:HAP1 p25

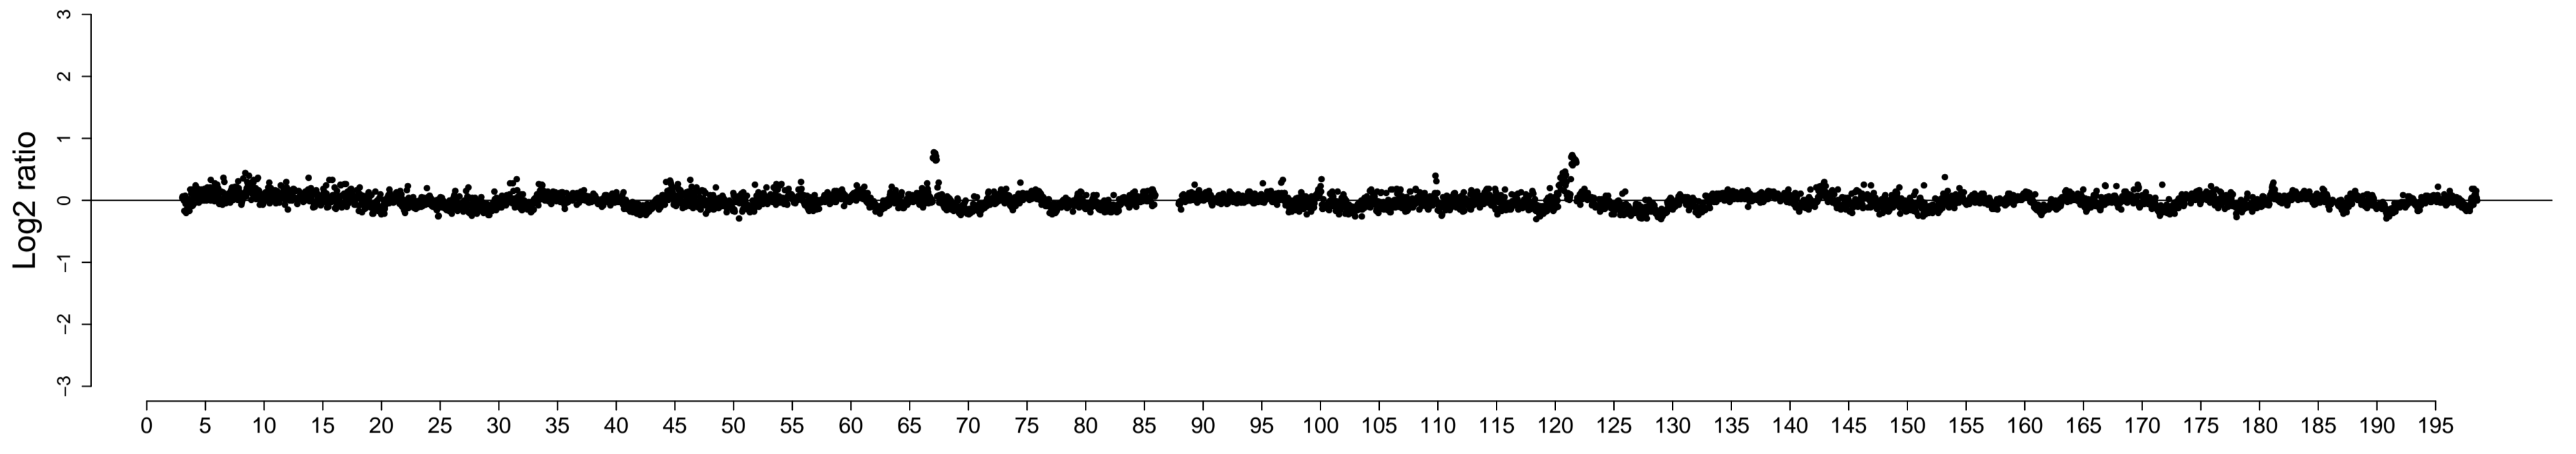

chr1:HAP2 p18

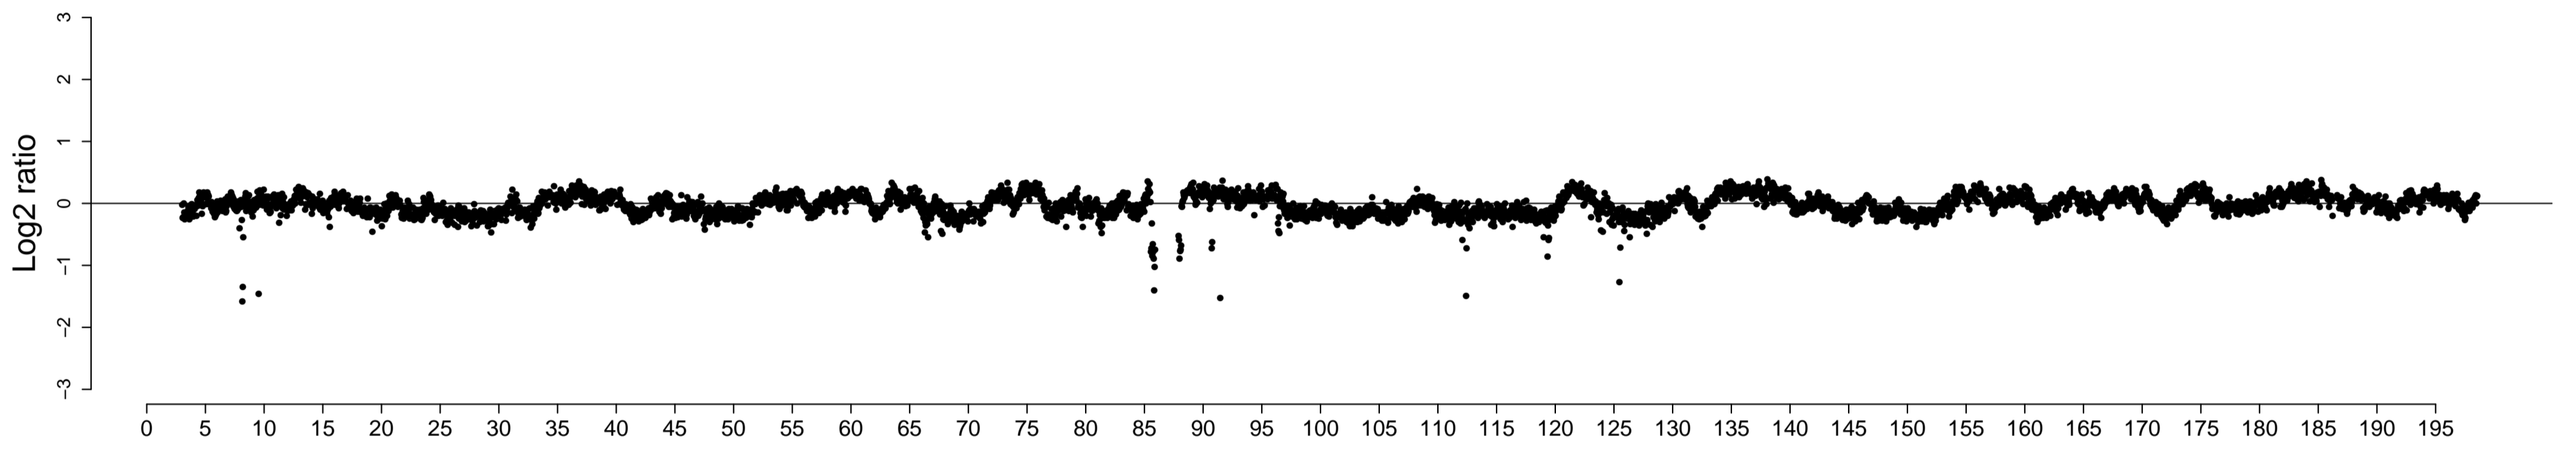

chr1:HTG\_control male kidney

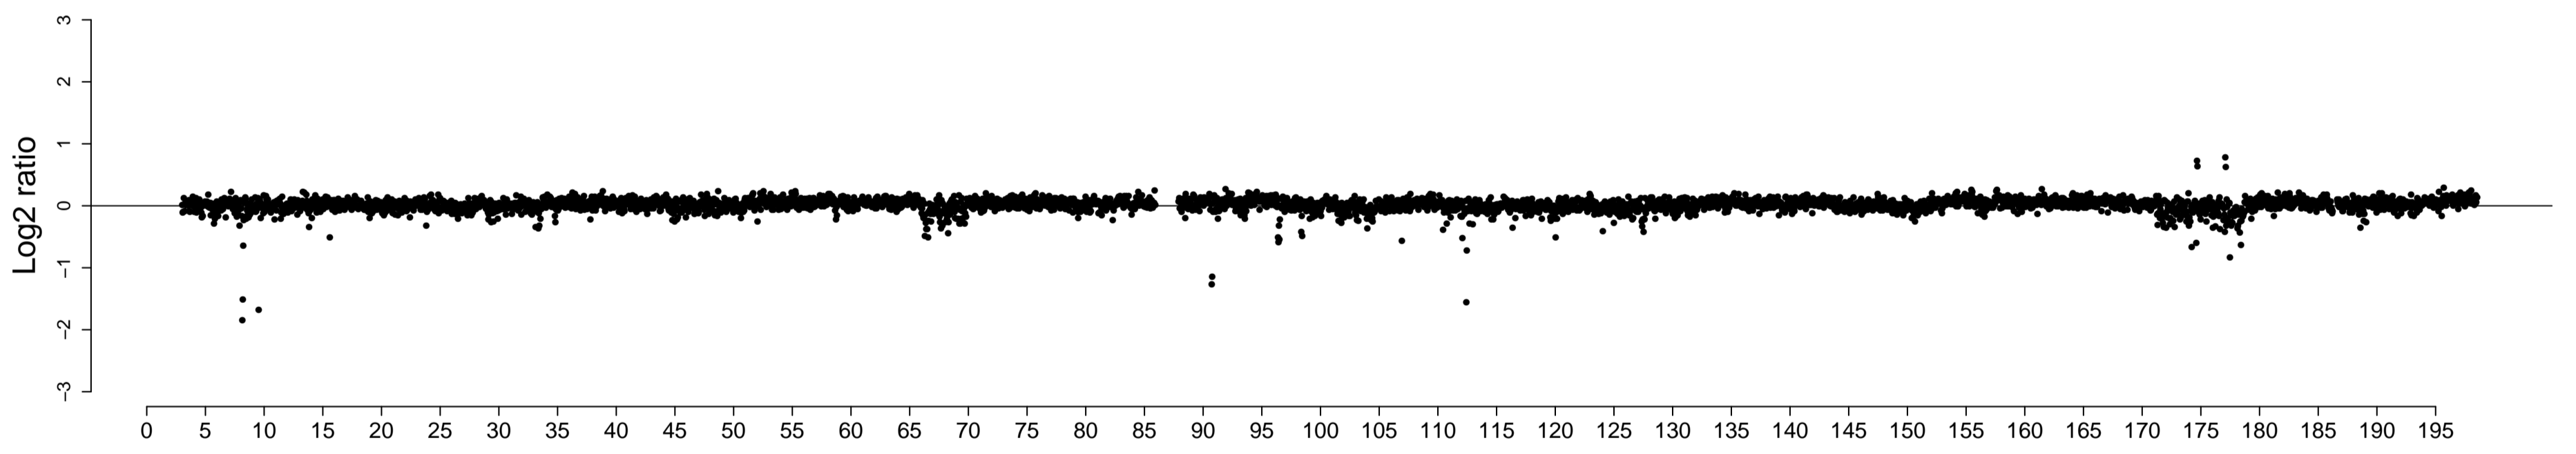

chr1:HTG1 p11

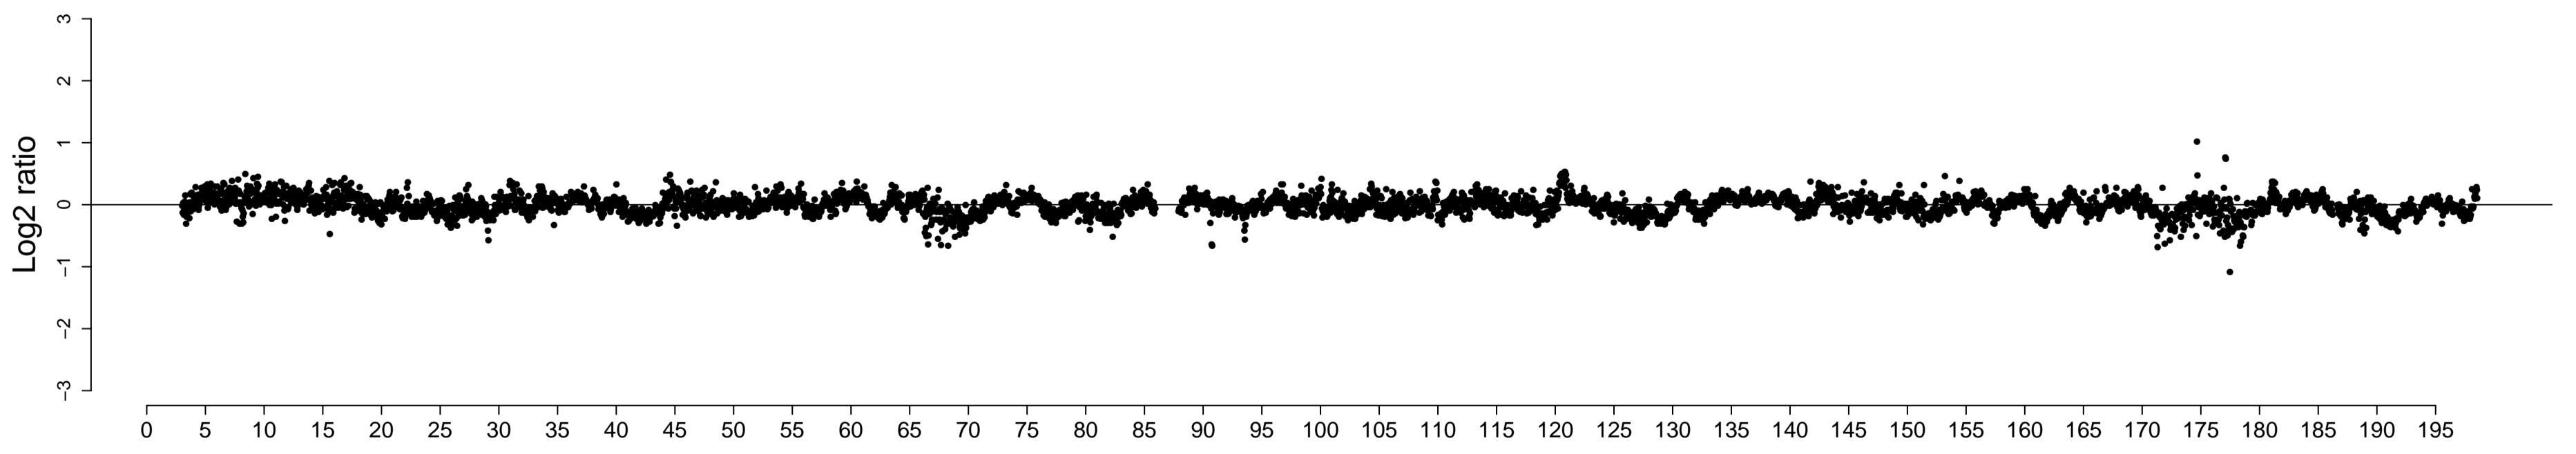

chr1:HTG2 p11

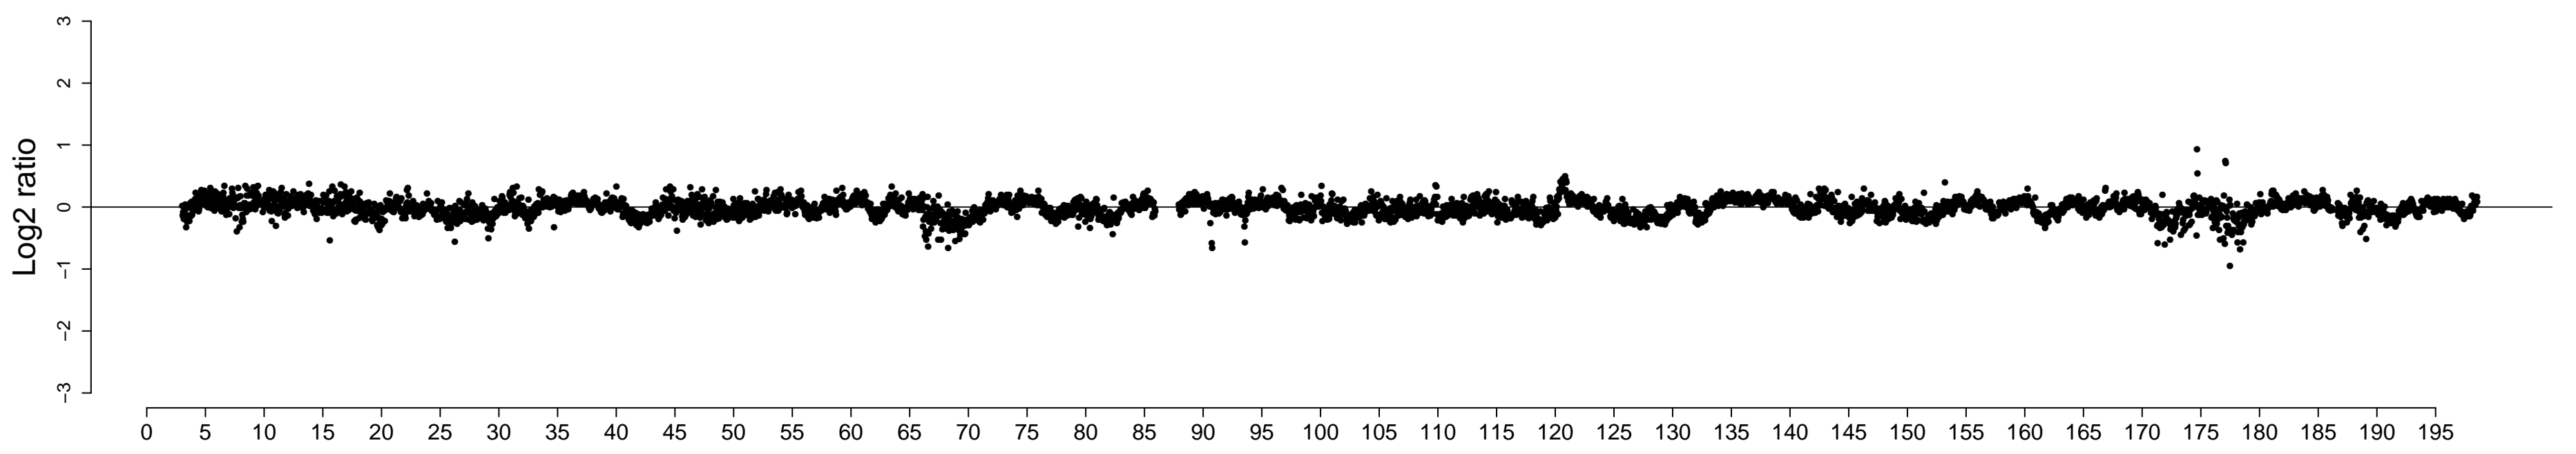

chr2:CBA control kidney

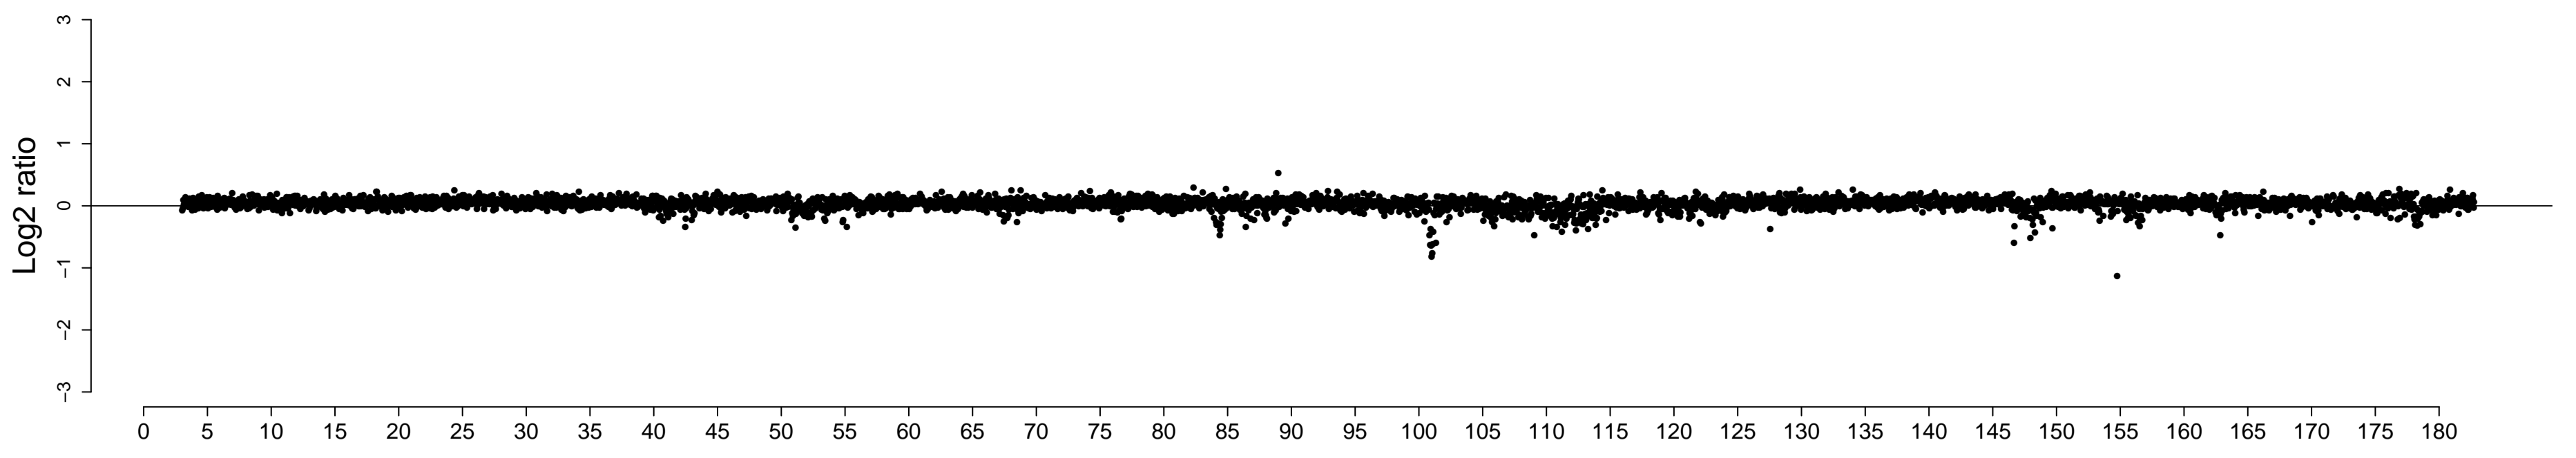

chr2:HAP1 p25

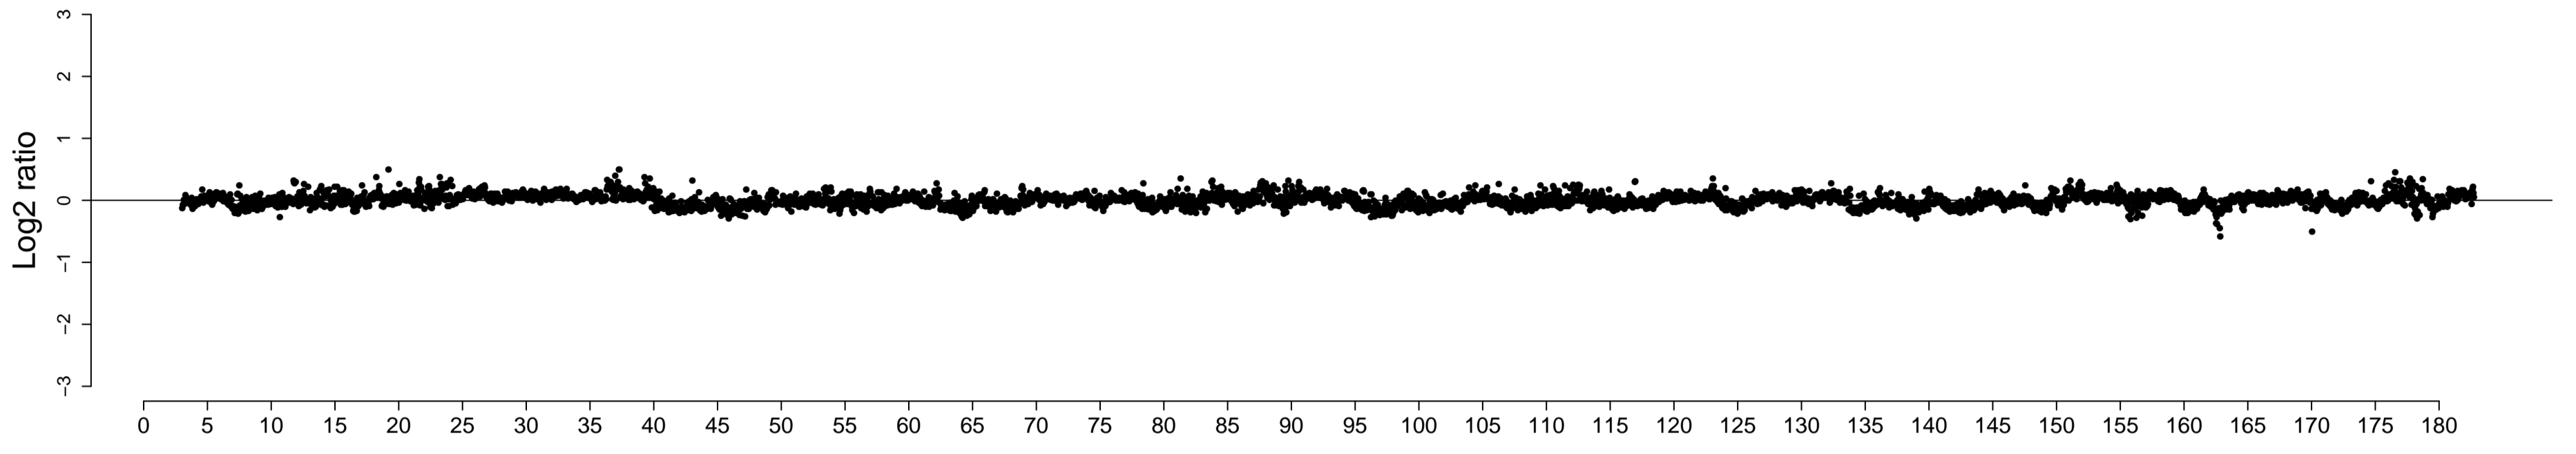

chr2:HAP2 p18

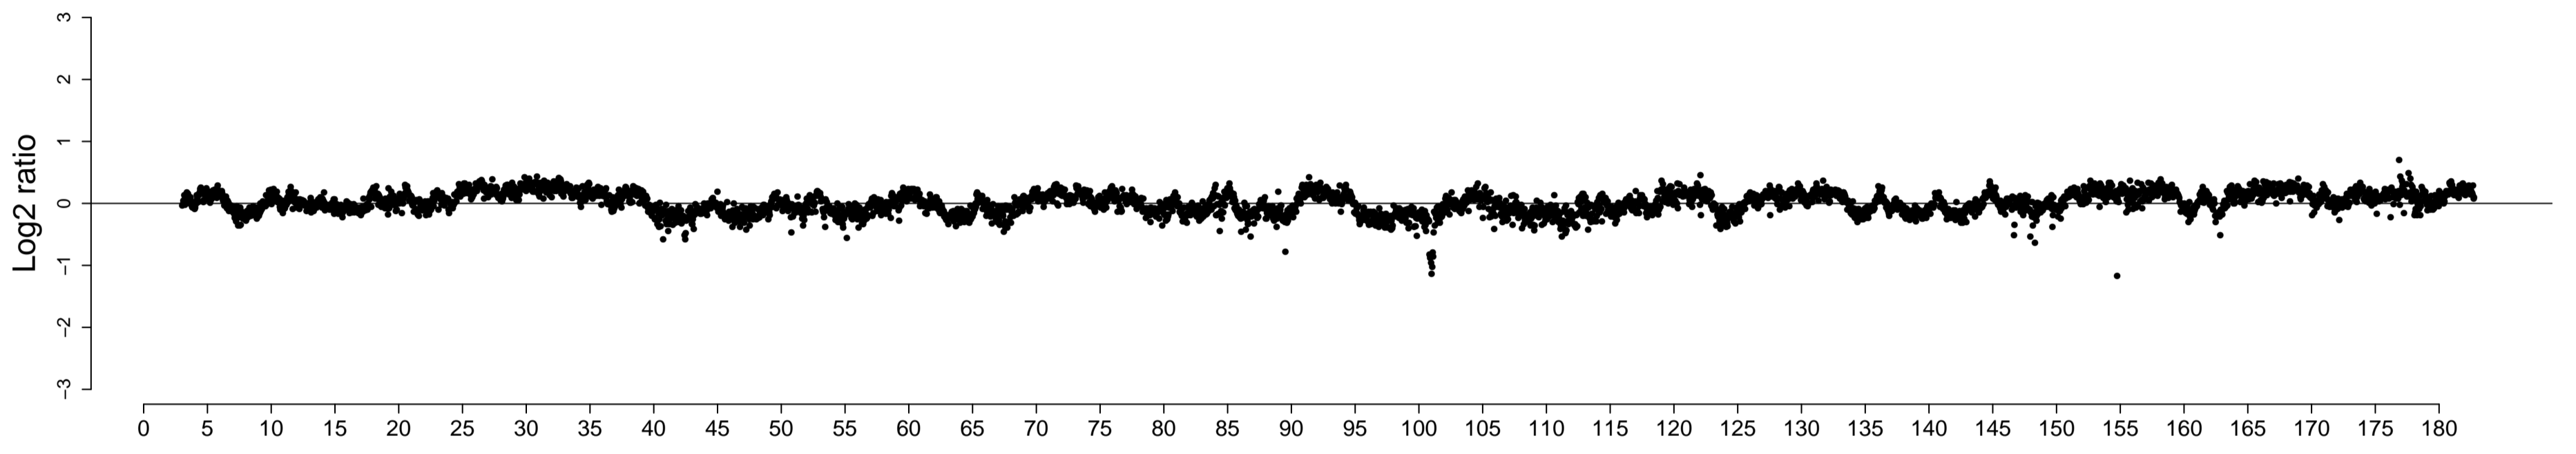

chr2:HTG\_control male kidney

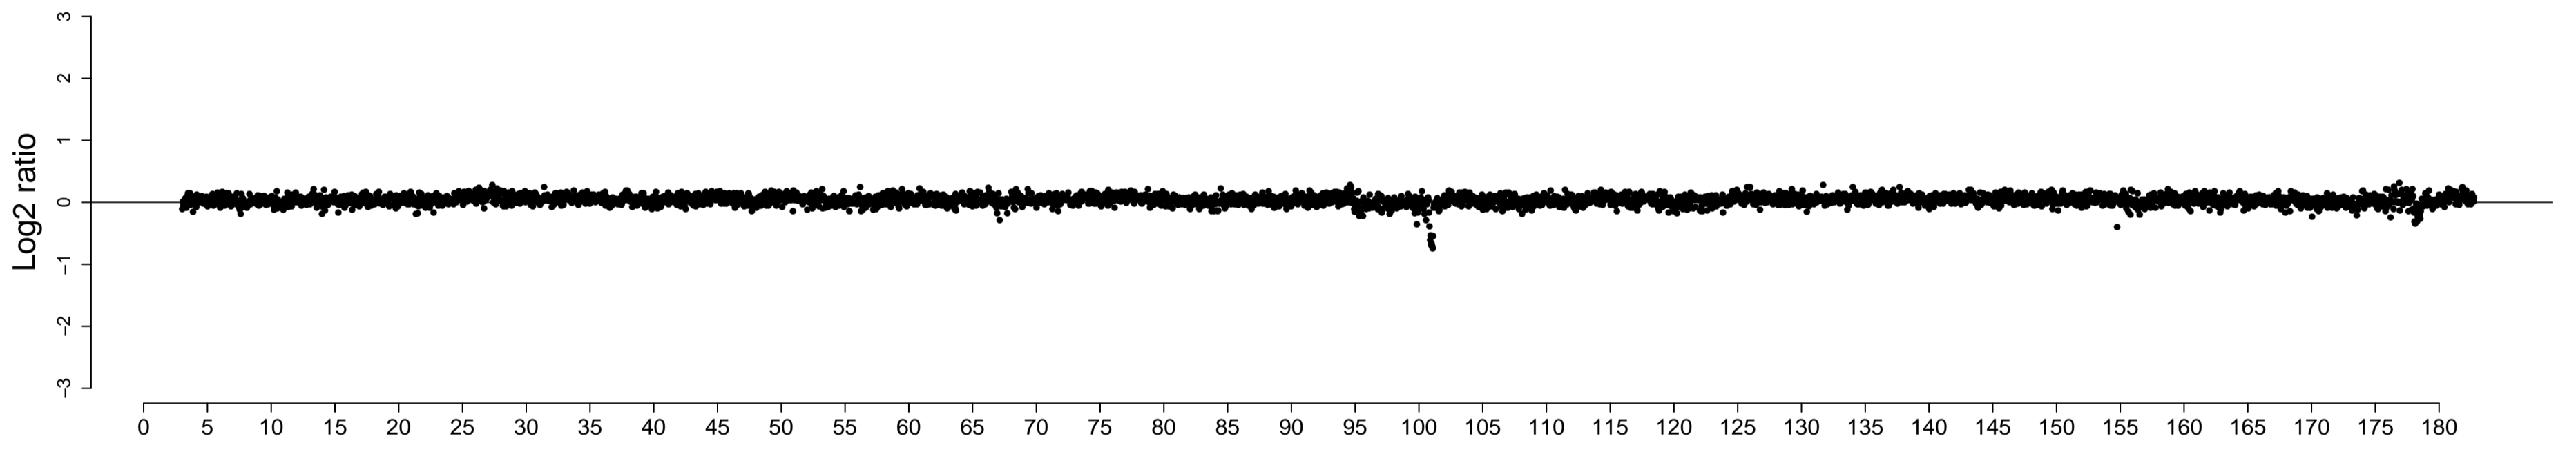

chr2:HTG1 p11

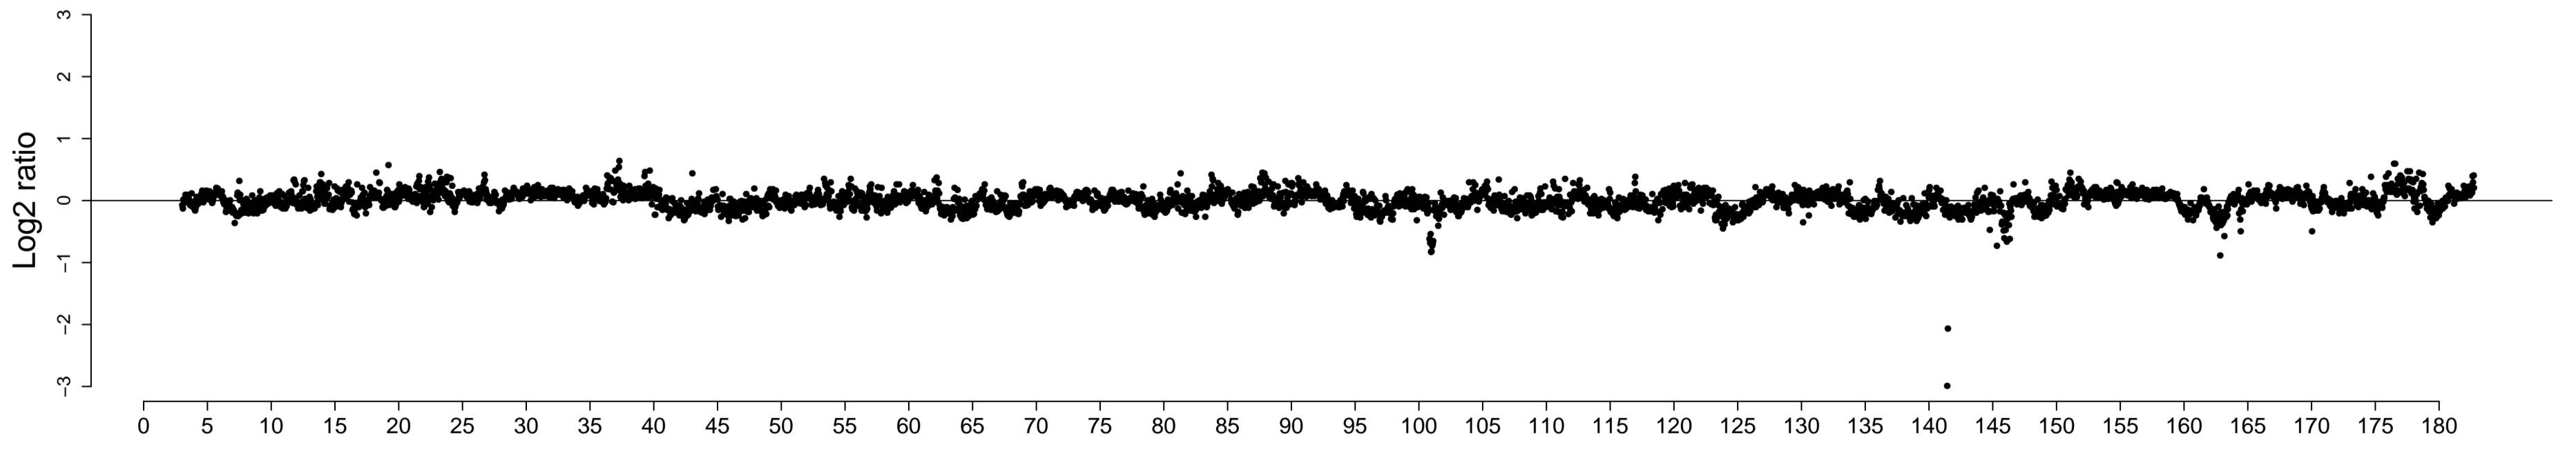

chr2:HTG2 p11

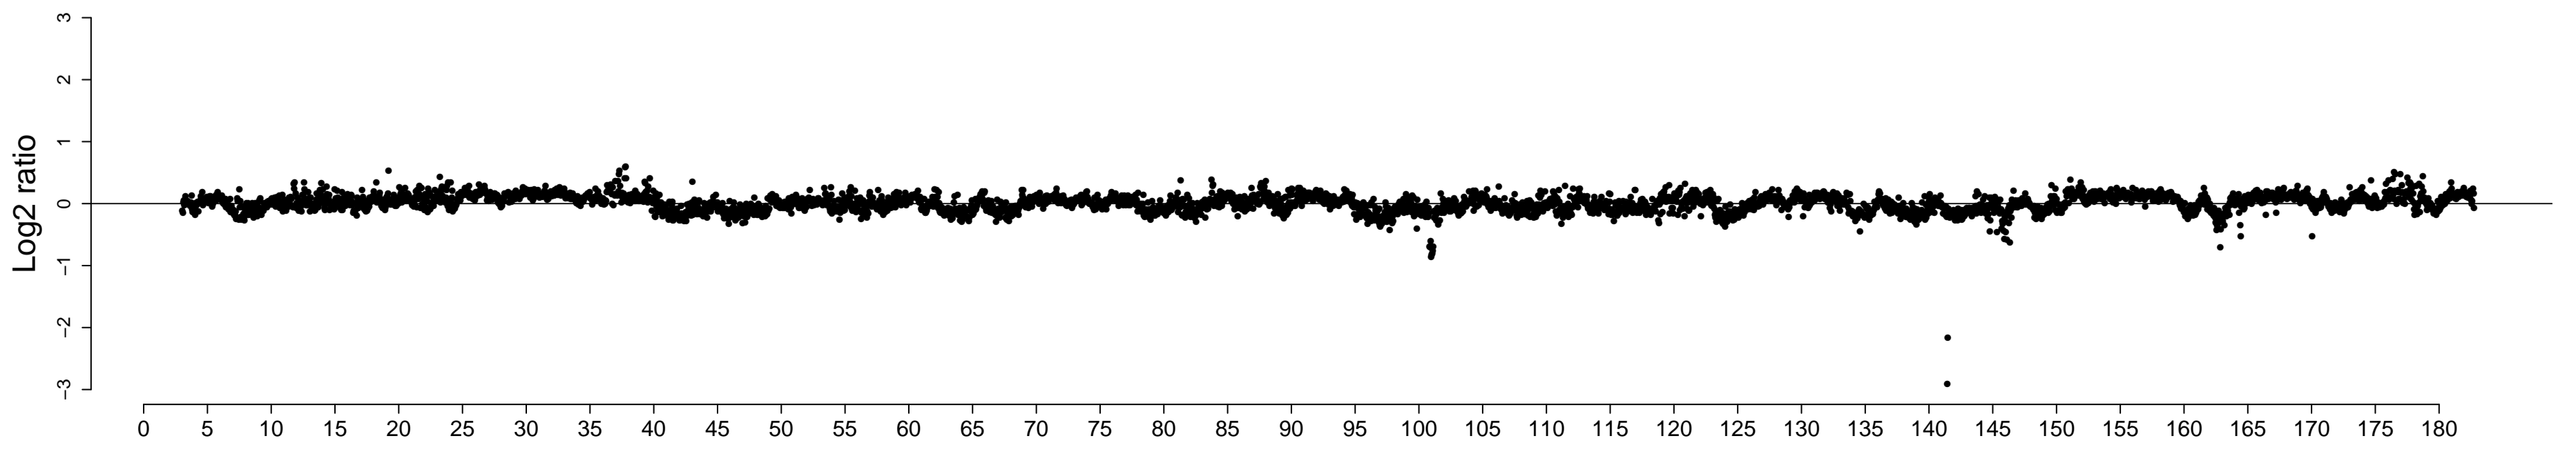

chr3:CBA control kidney

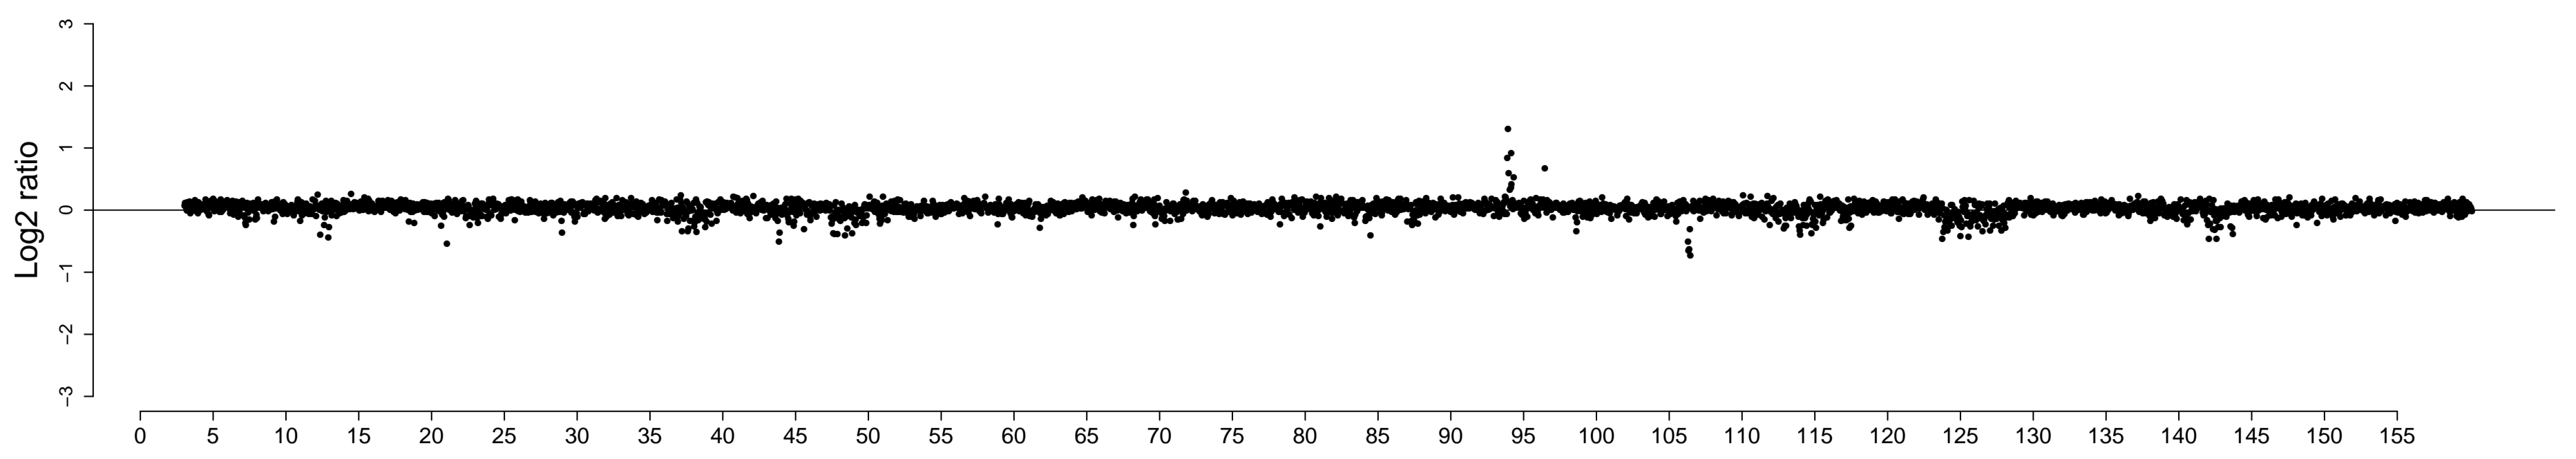

chr3:HAP1 p25

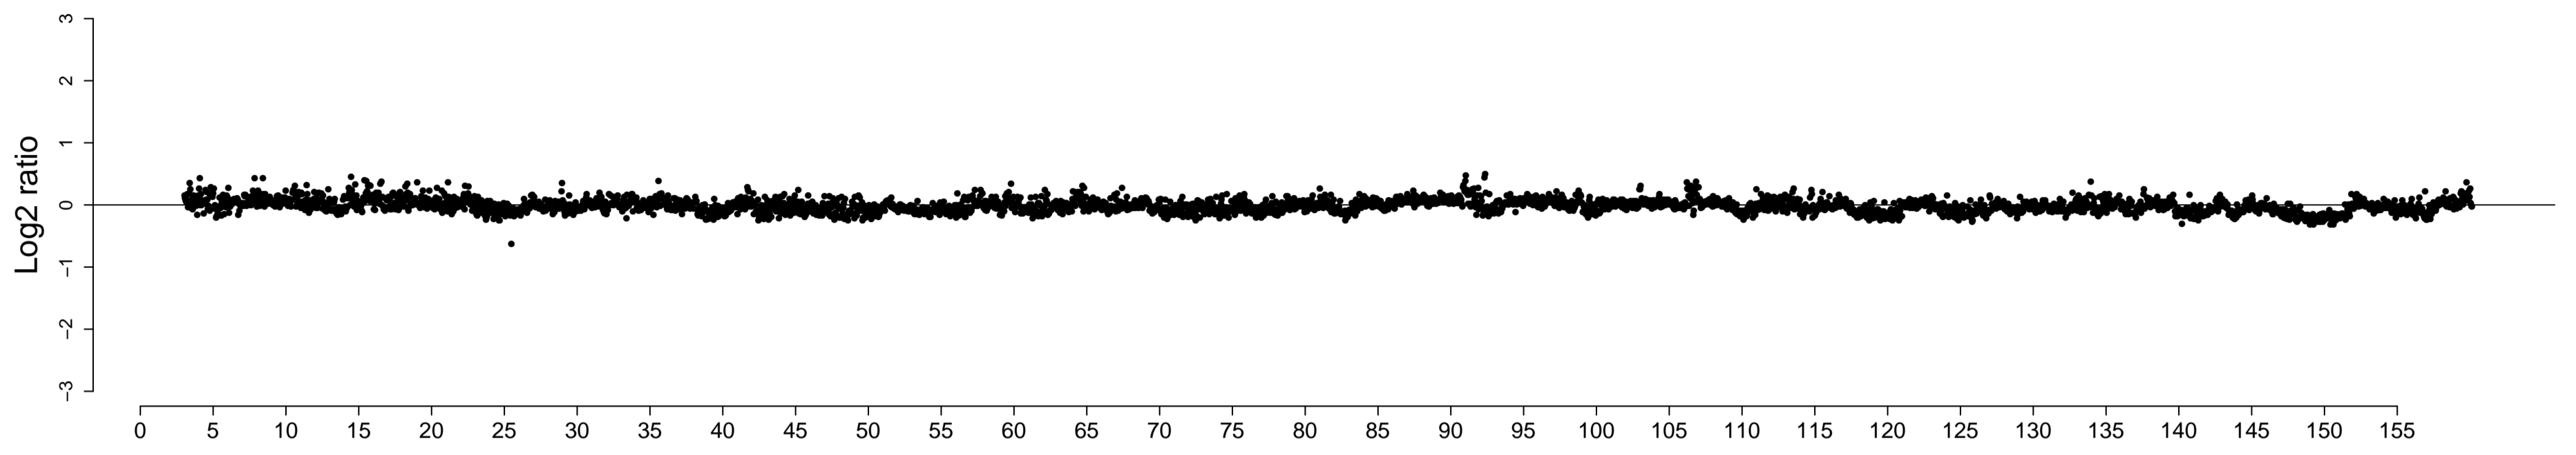

chr3:HAP2 p18

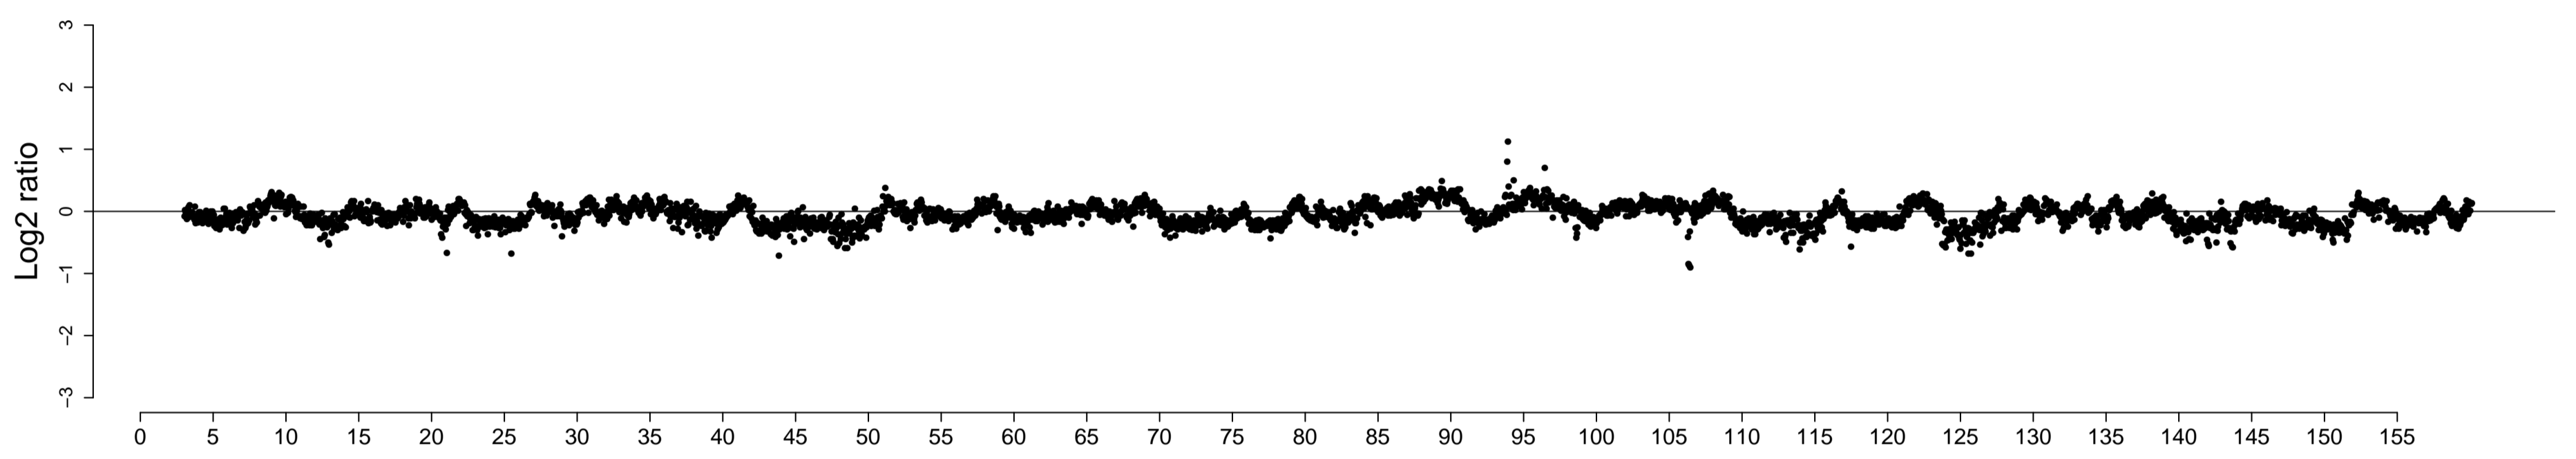

chr3:HTG\_control male kidney

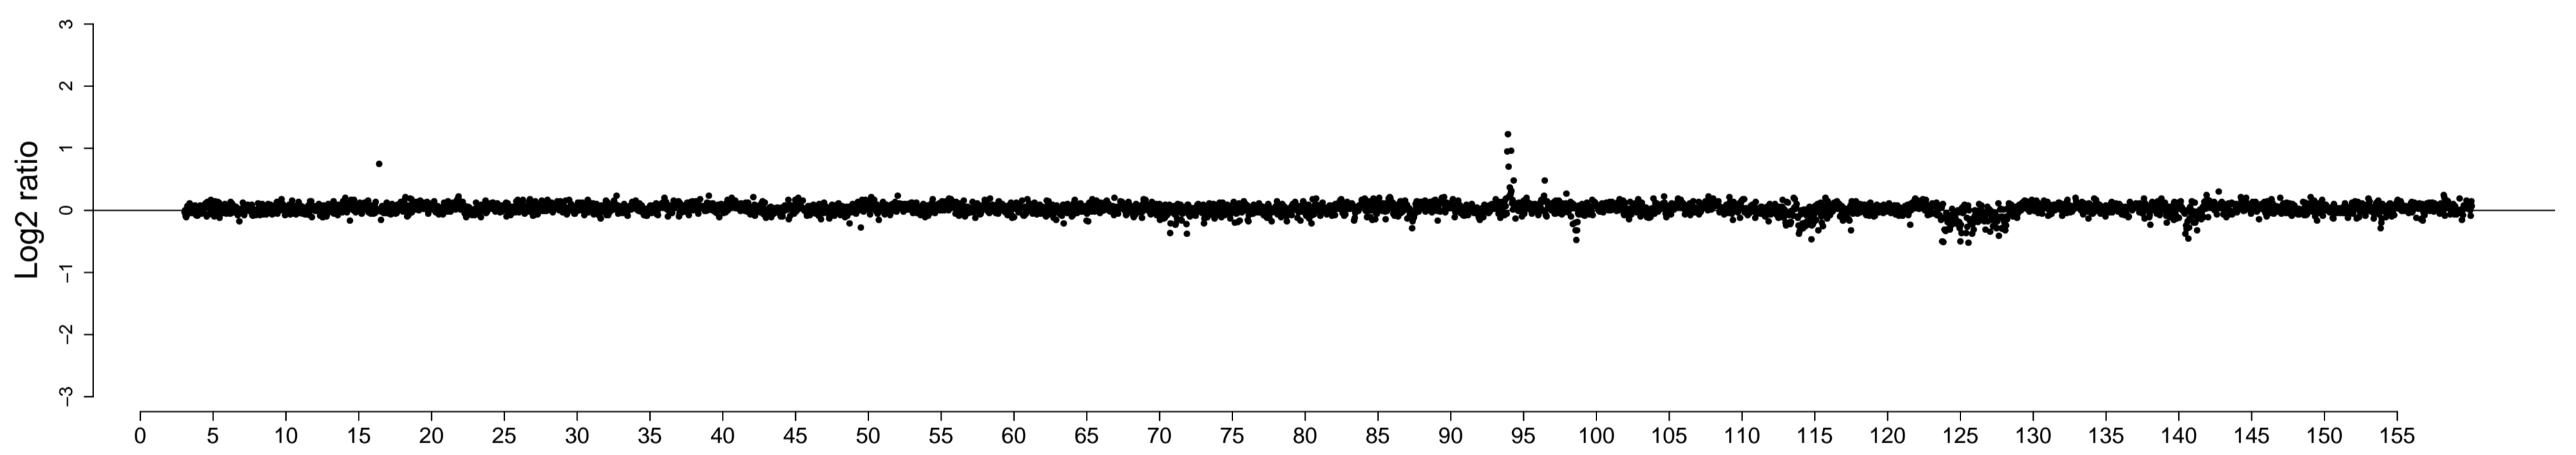

chr3:HTG1 p11

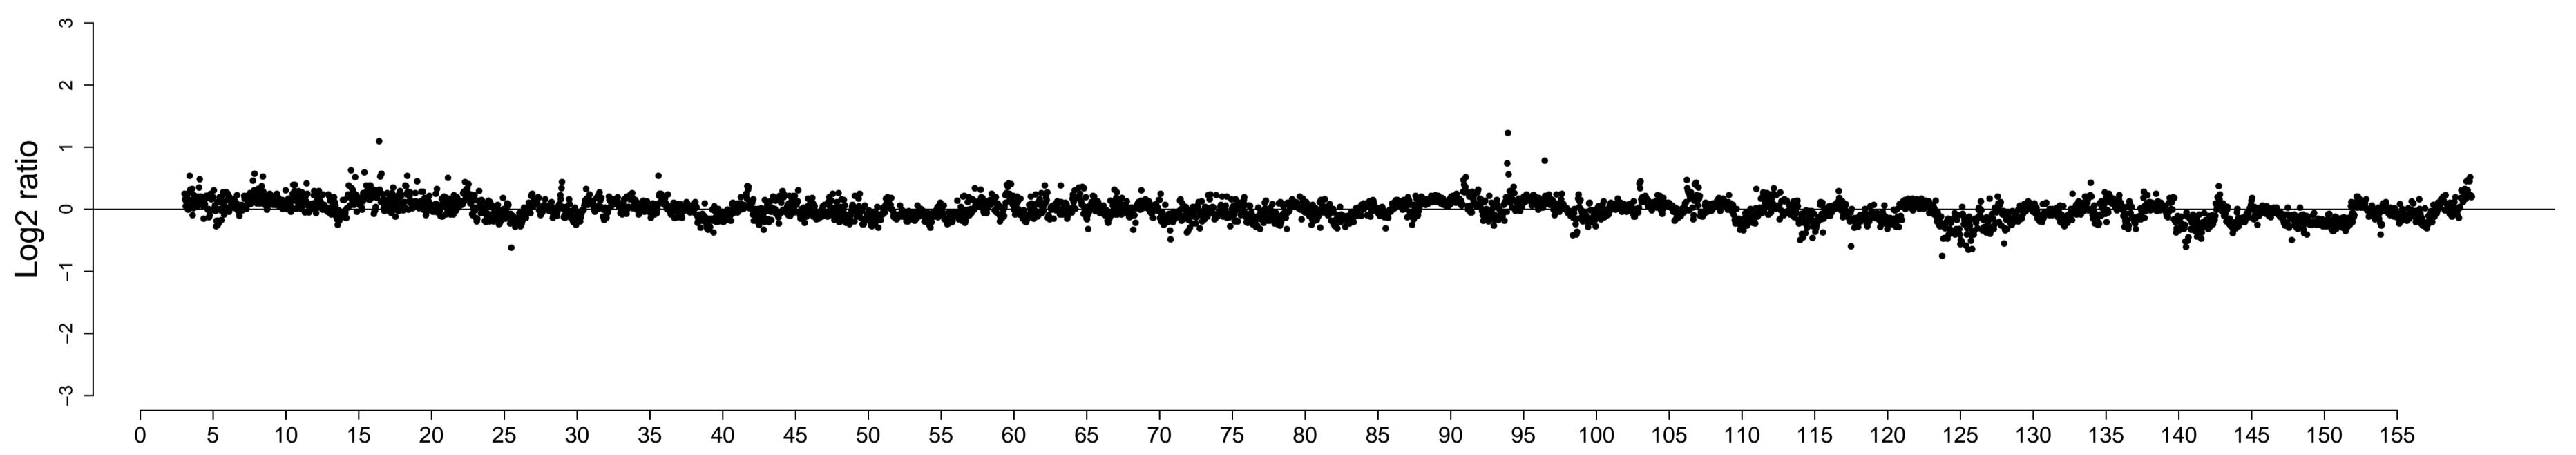

chr3:HTG2 p11

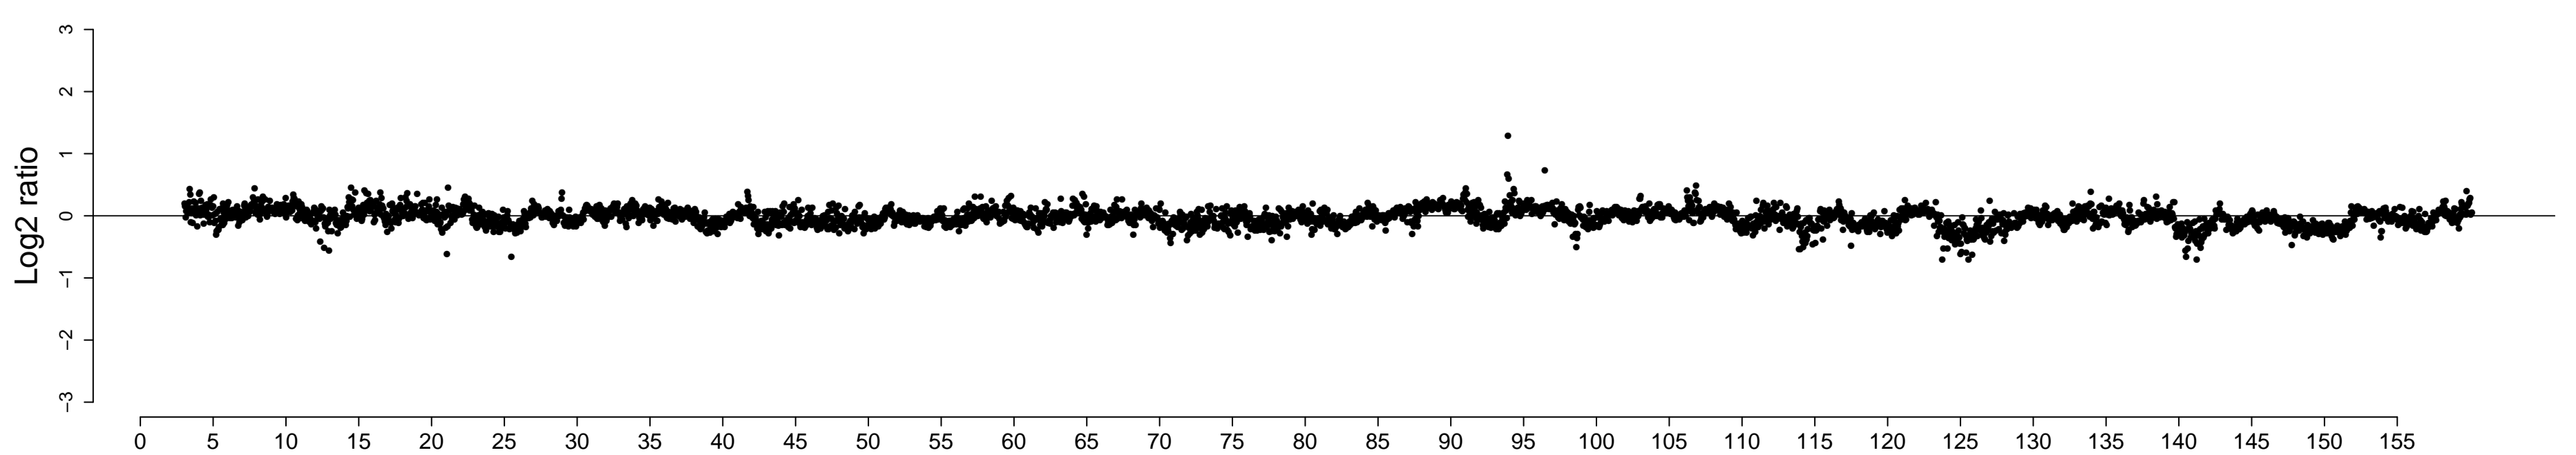

chr4:CBA control kidney

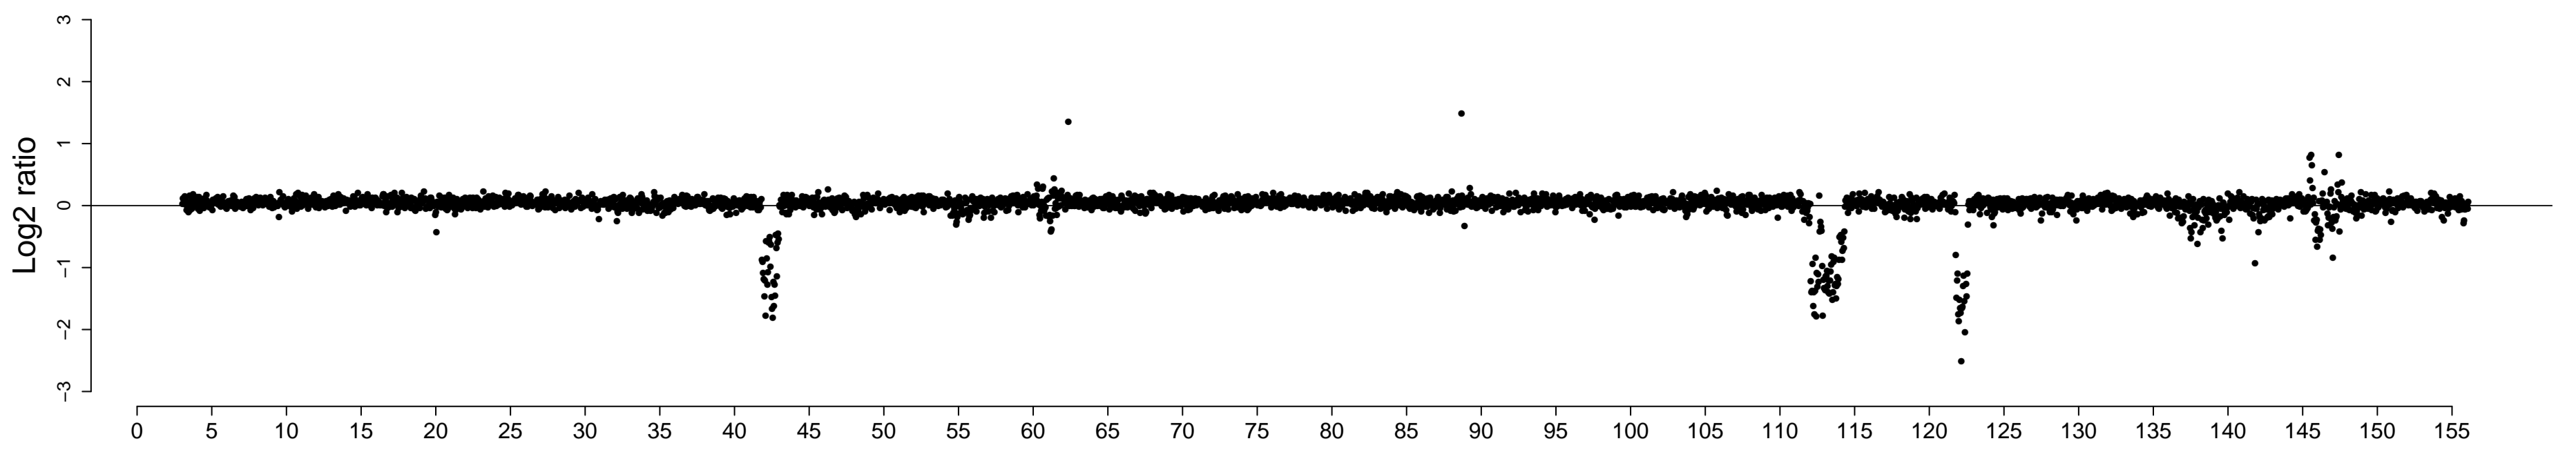

chr4:HAP1 p25

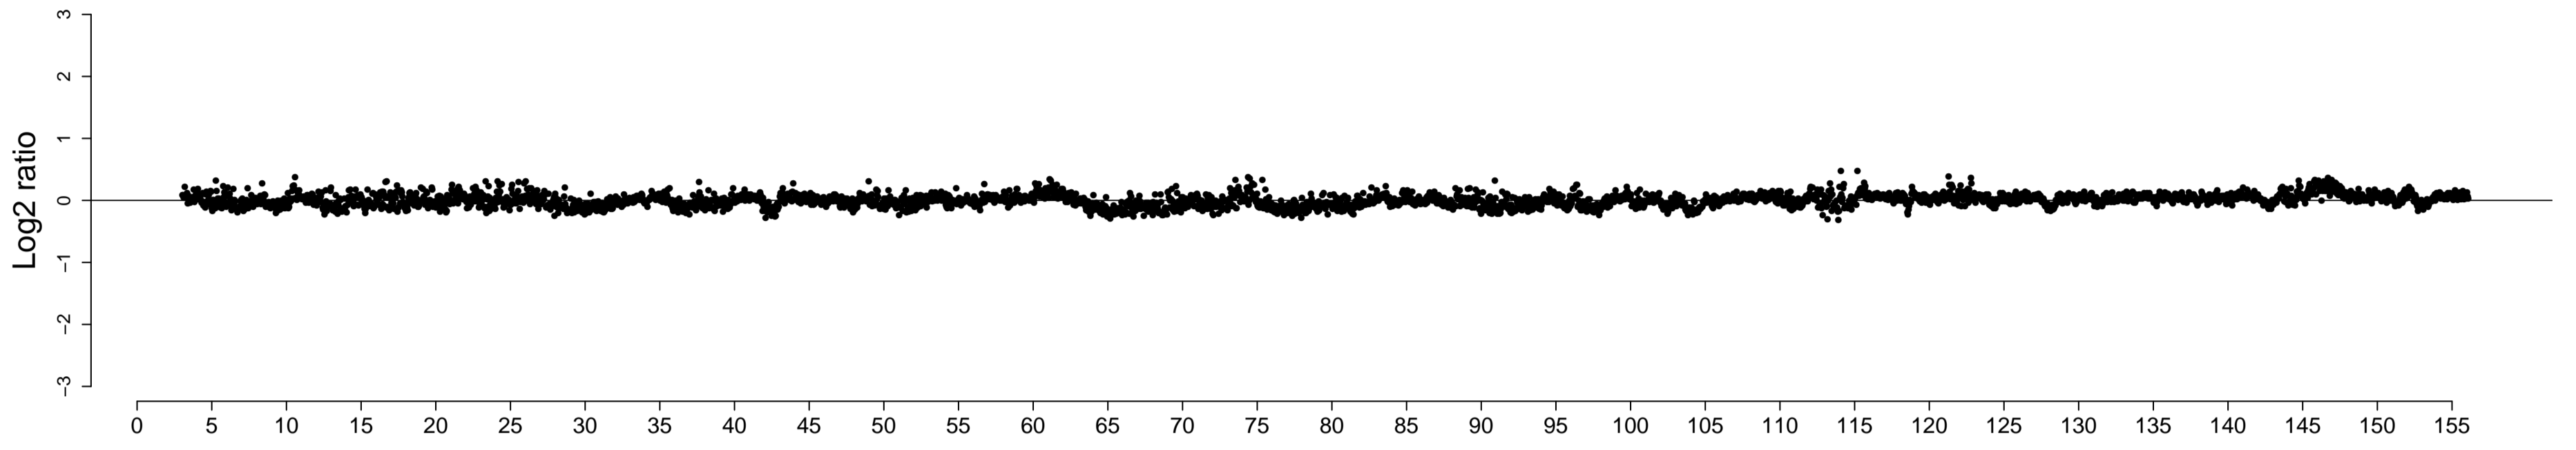

chr4:HAP2 p18

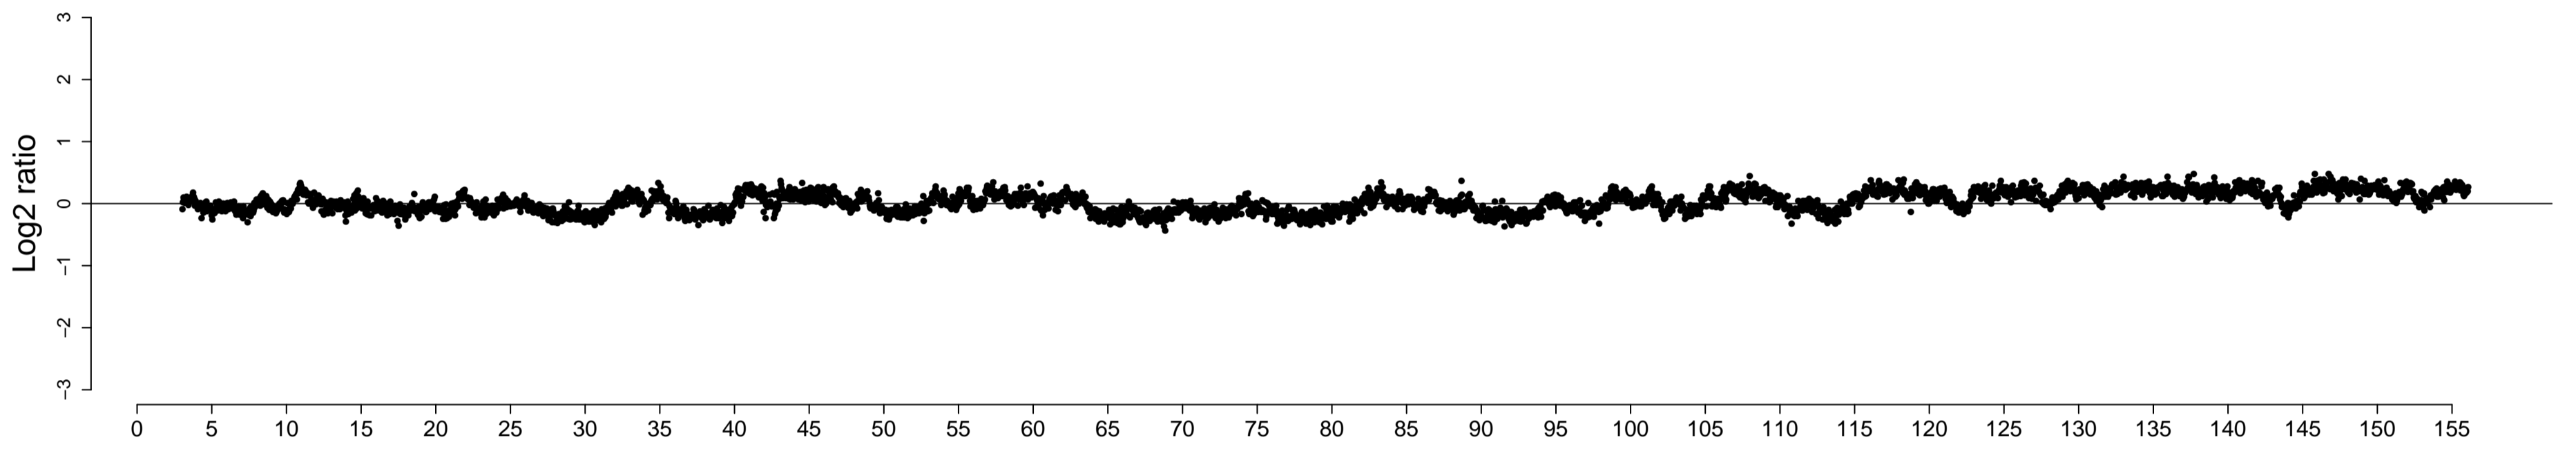

chr4:HTG\_control male kidney

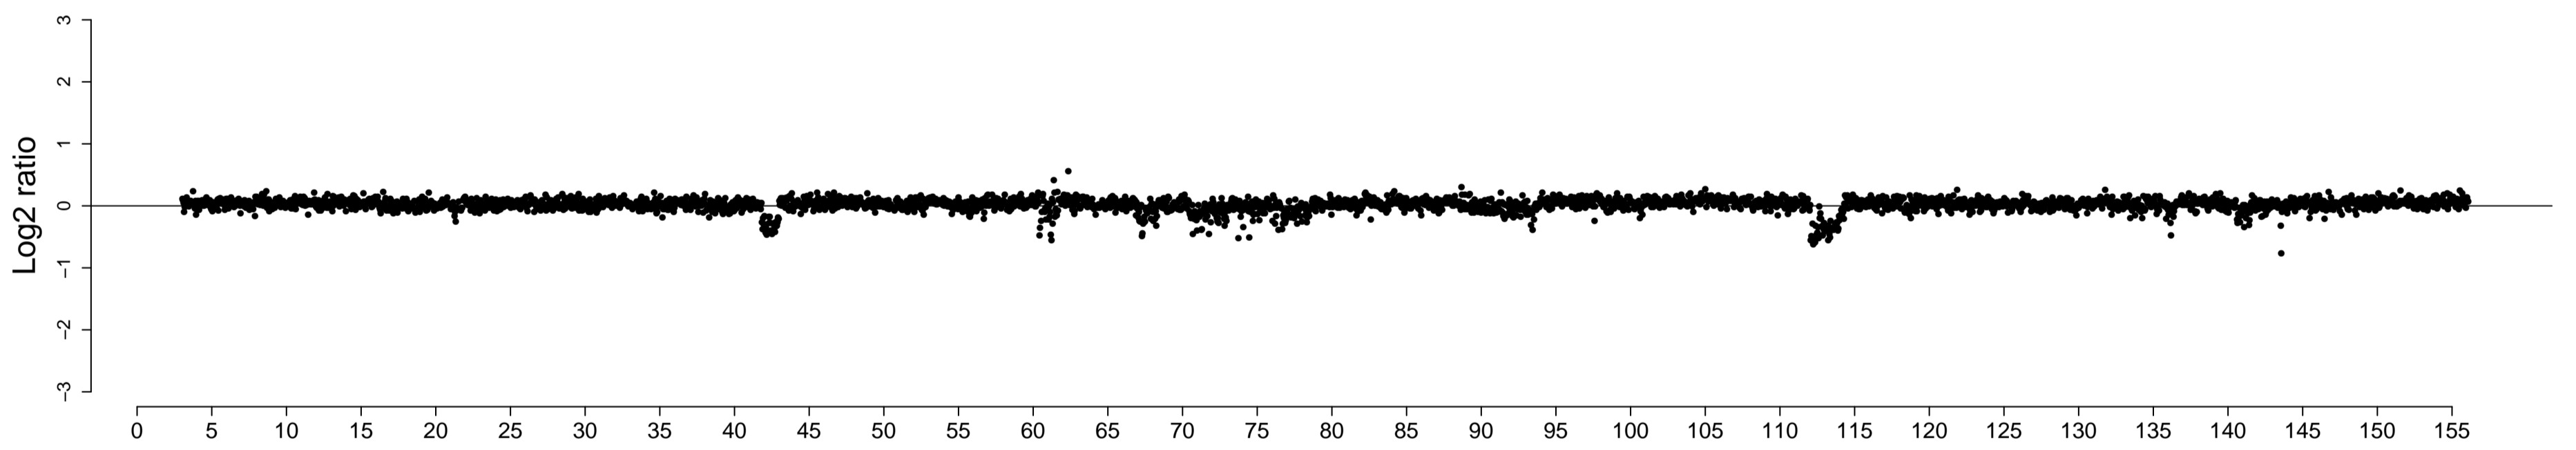

chr4:HTG1 p11

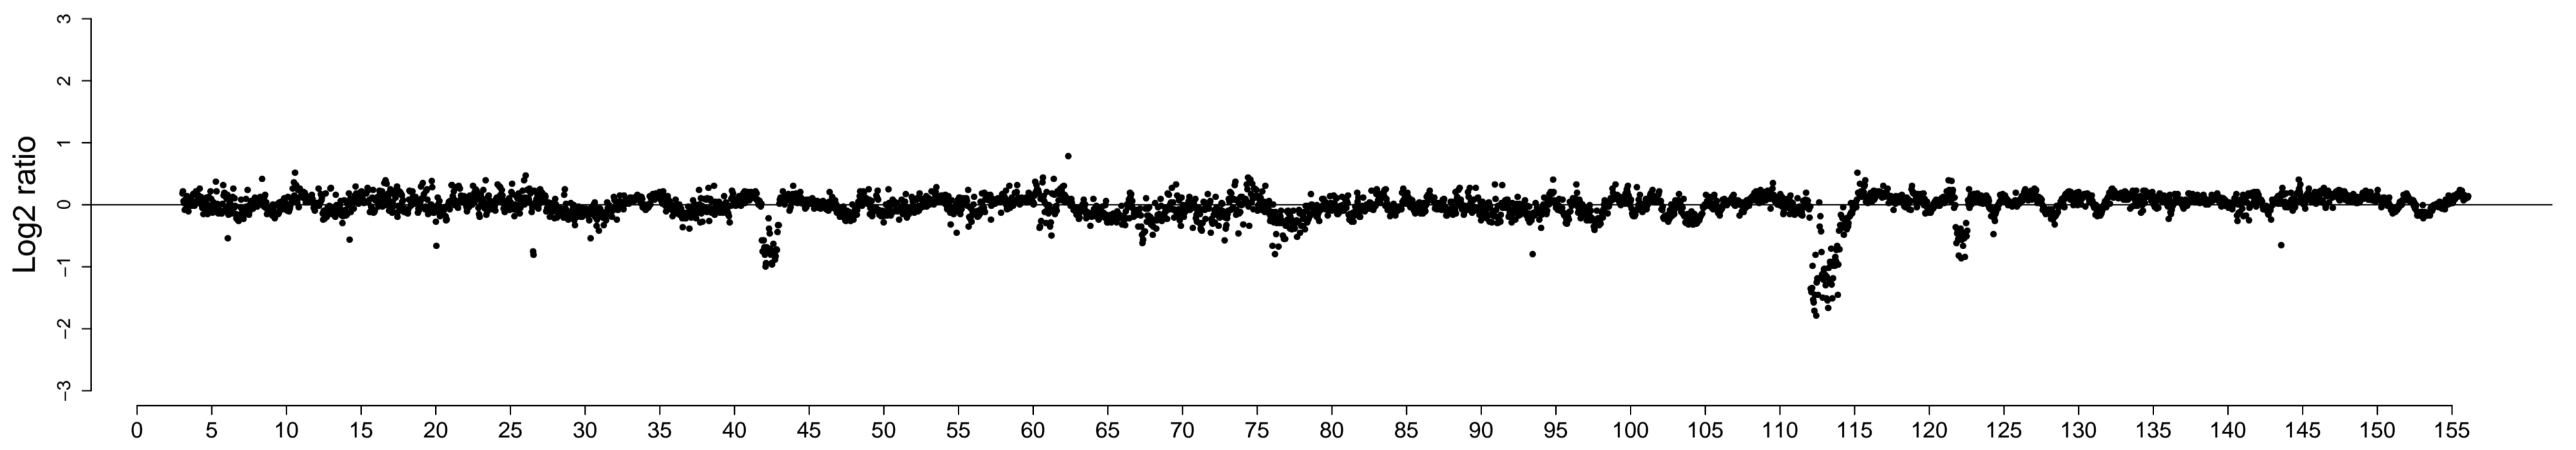

chr4:HTG2 p11

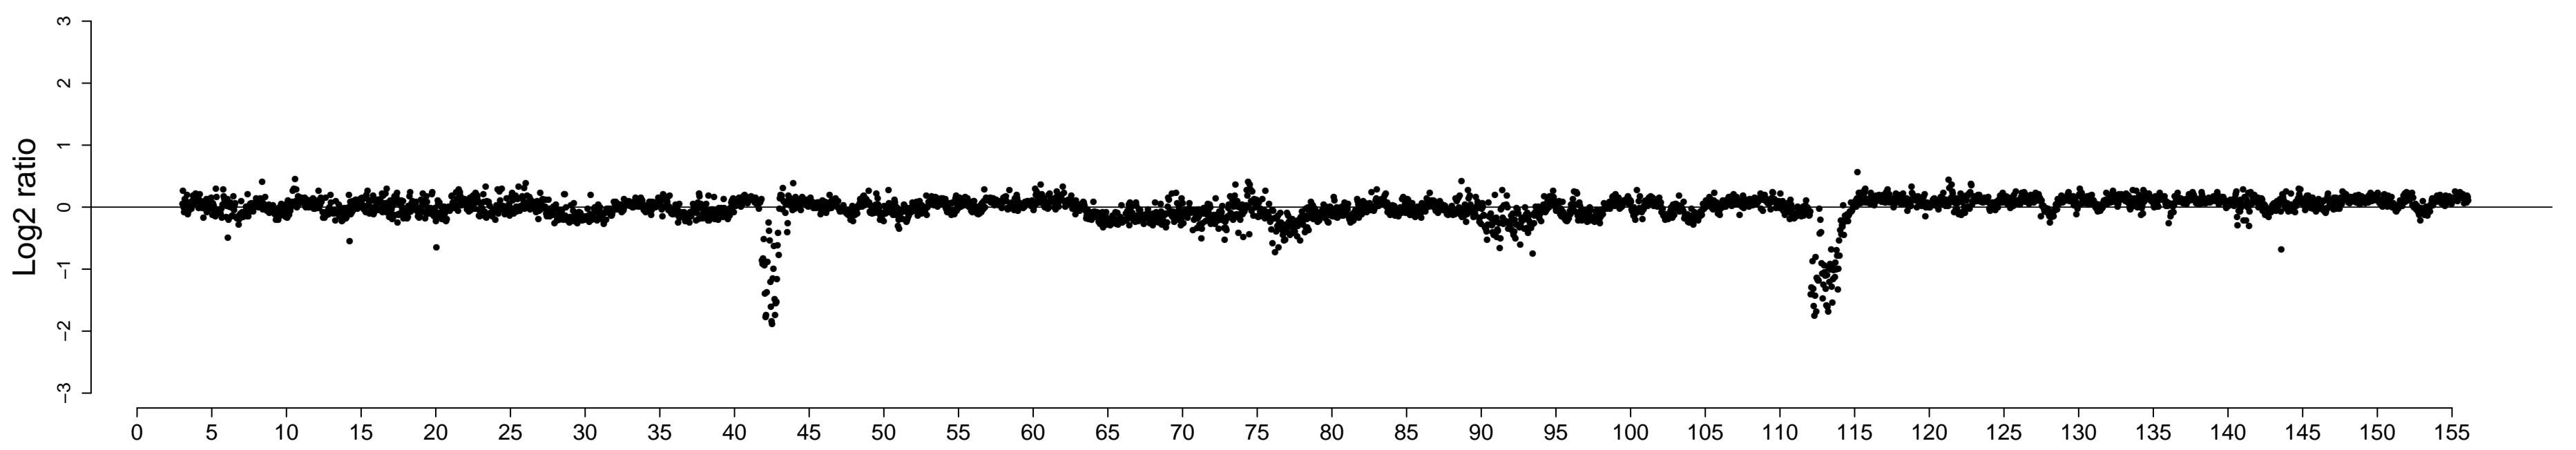



chr5:CBA control kidney

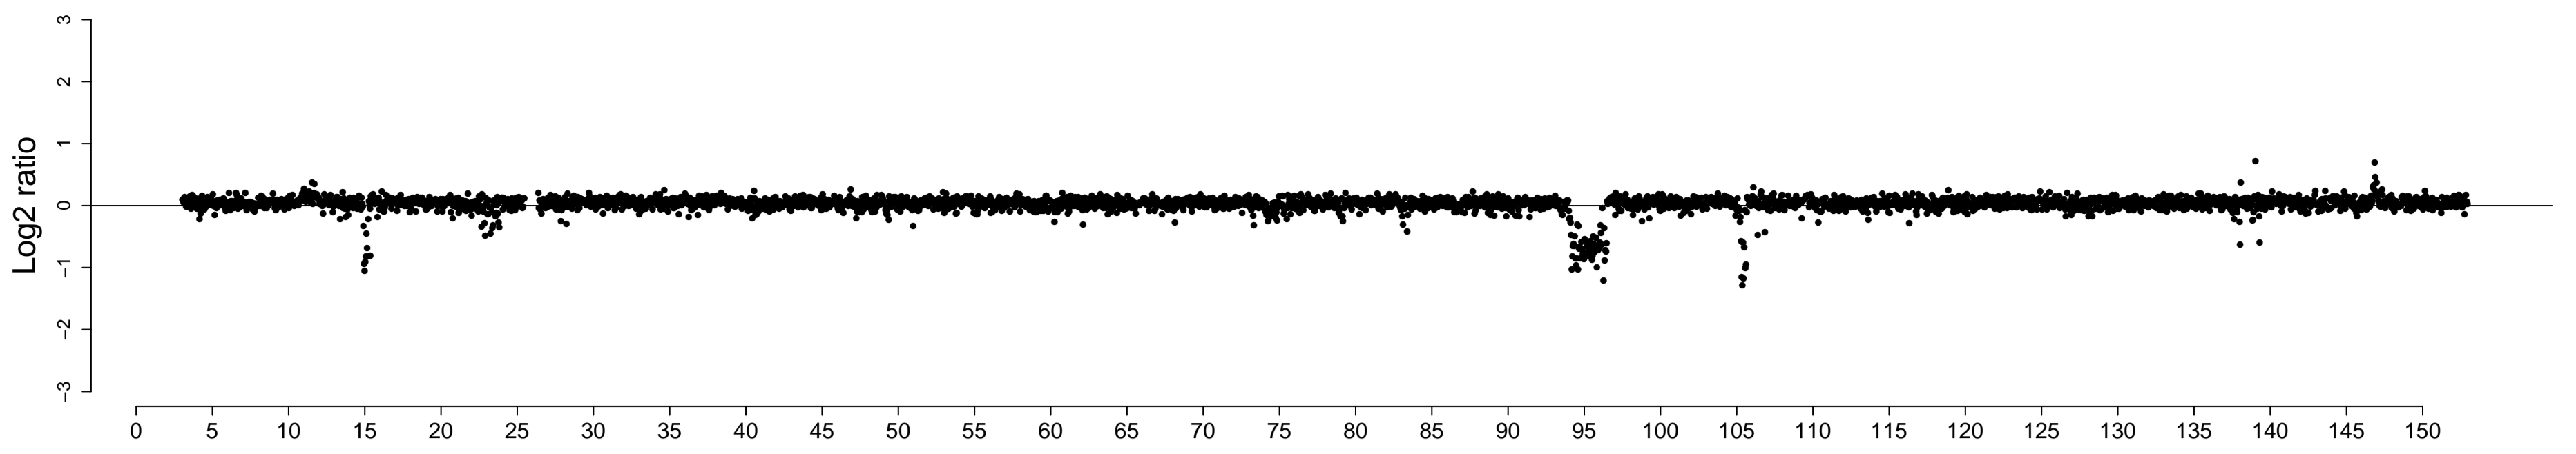

chr5:HAP1 p25

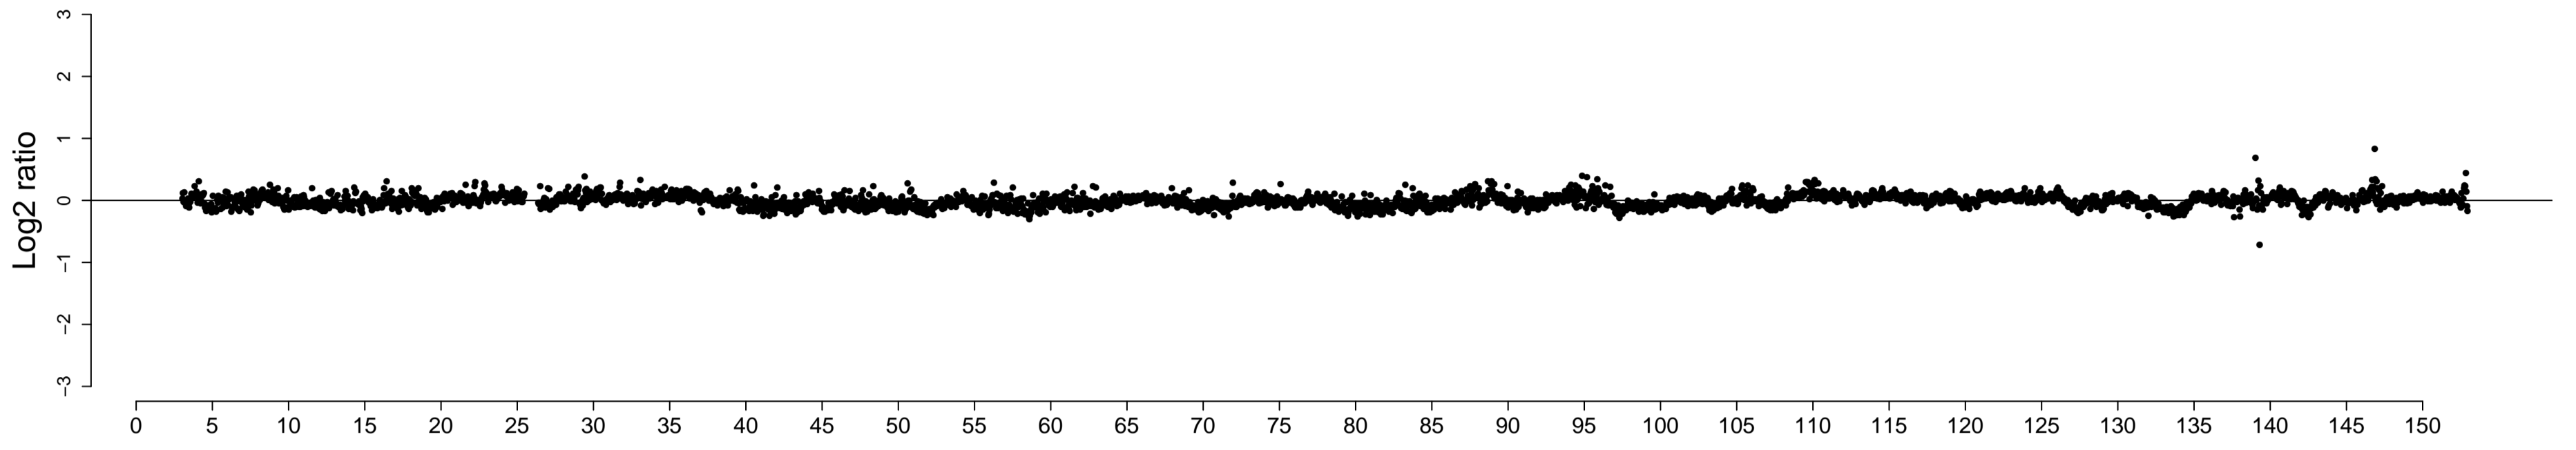

chr5:HAP2 p18

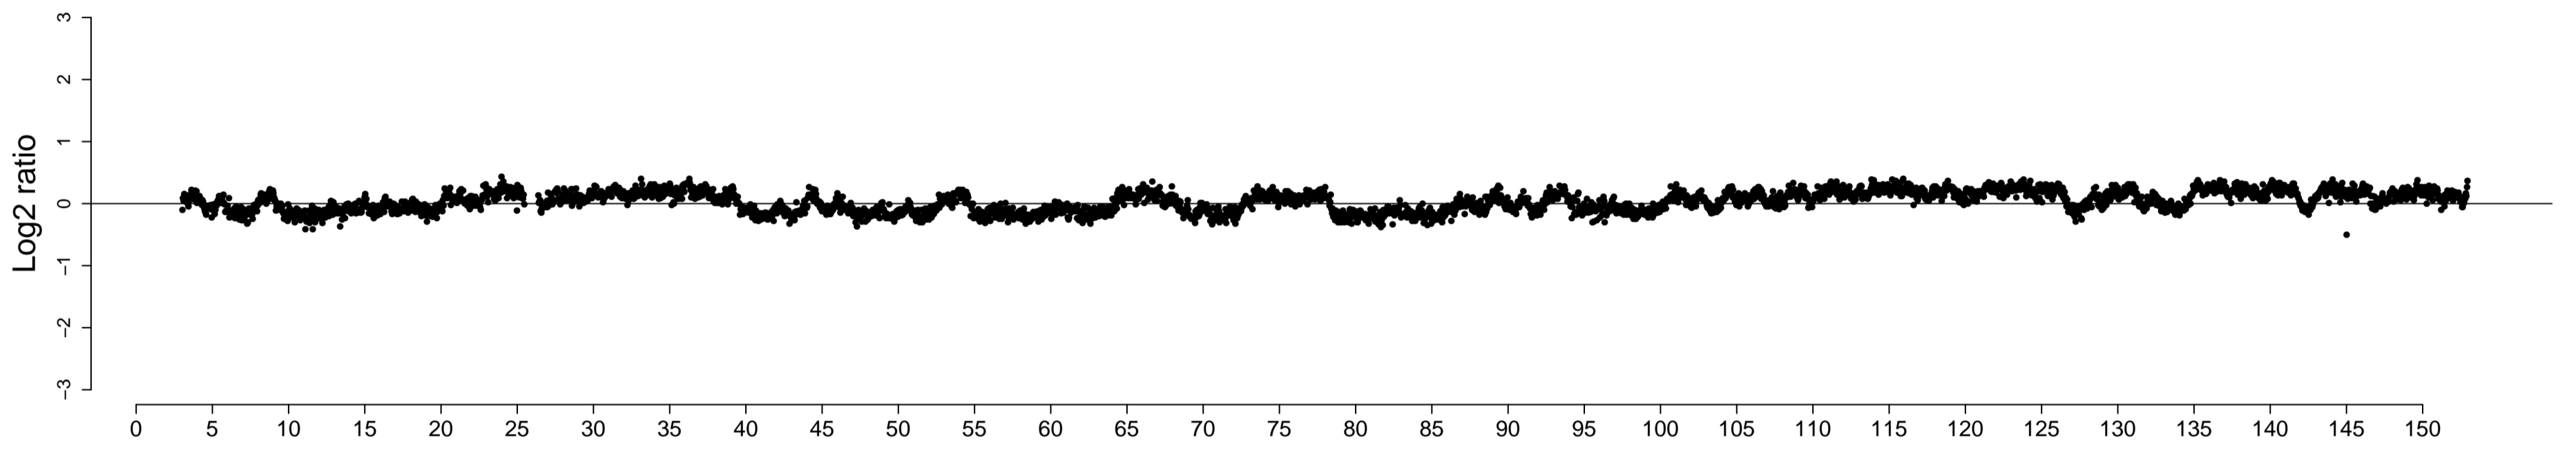

chr5:HTG\_control male kidney

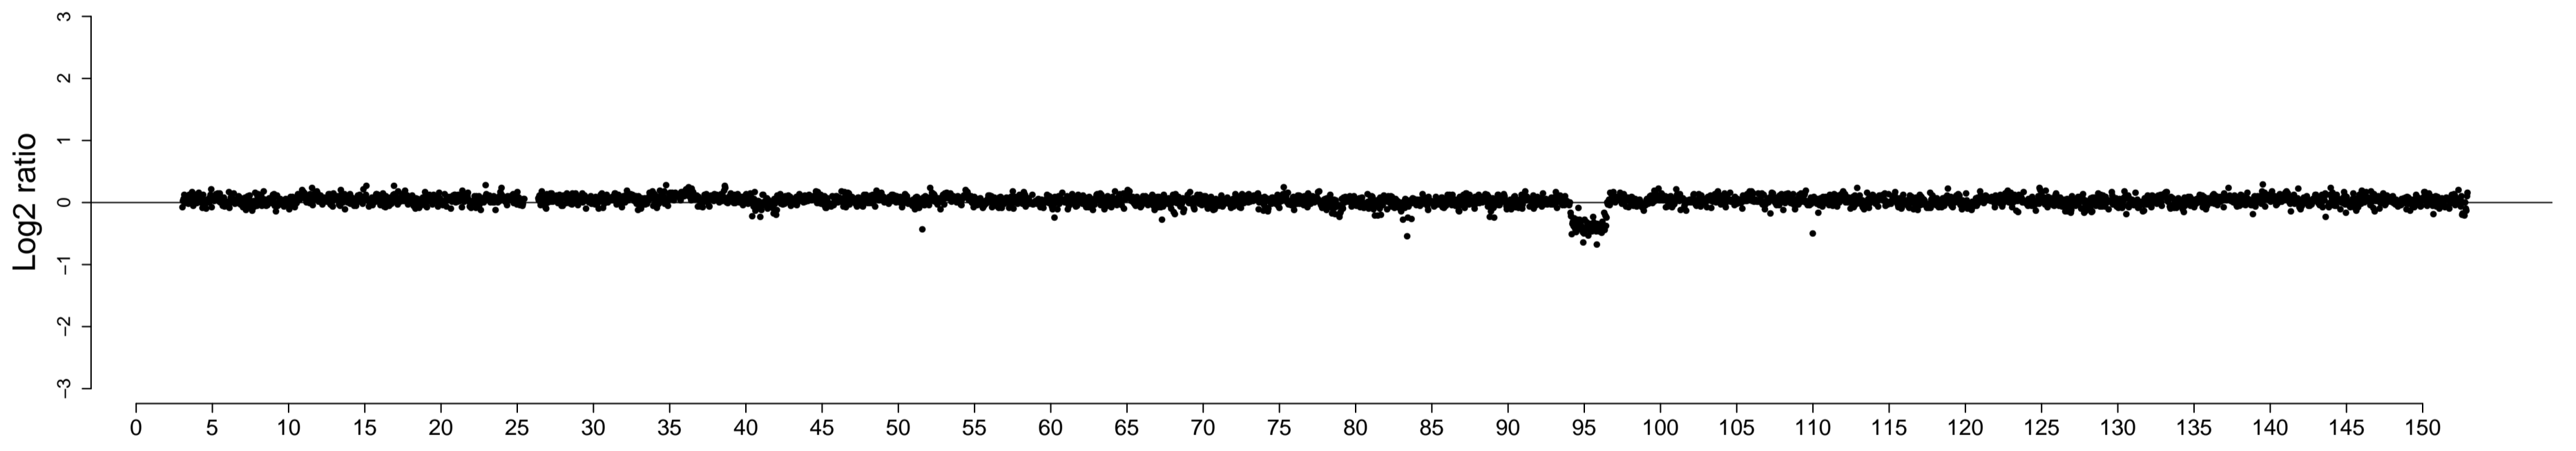

chr5:HTG1 p11

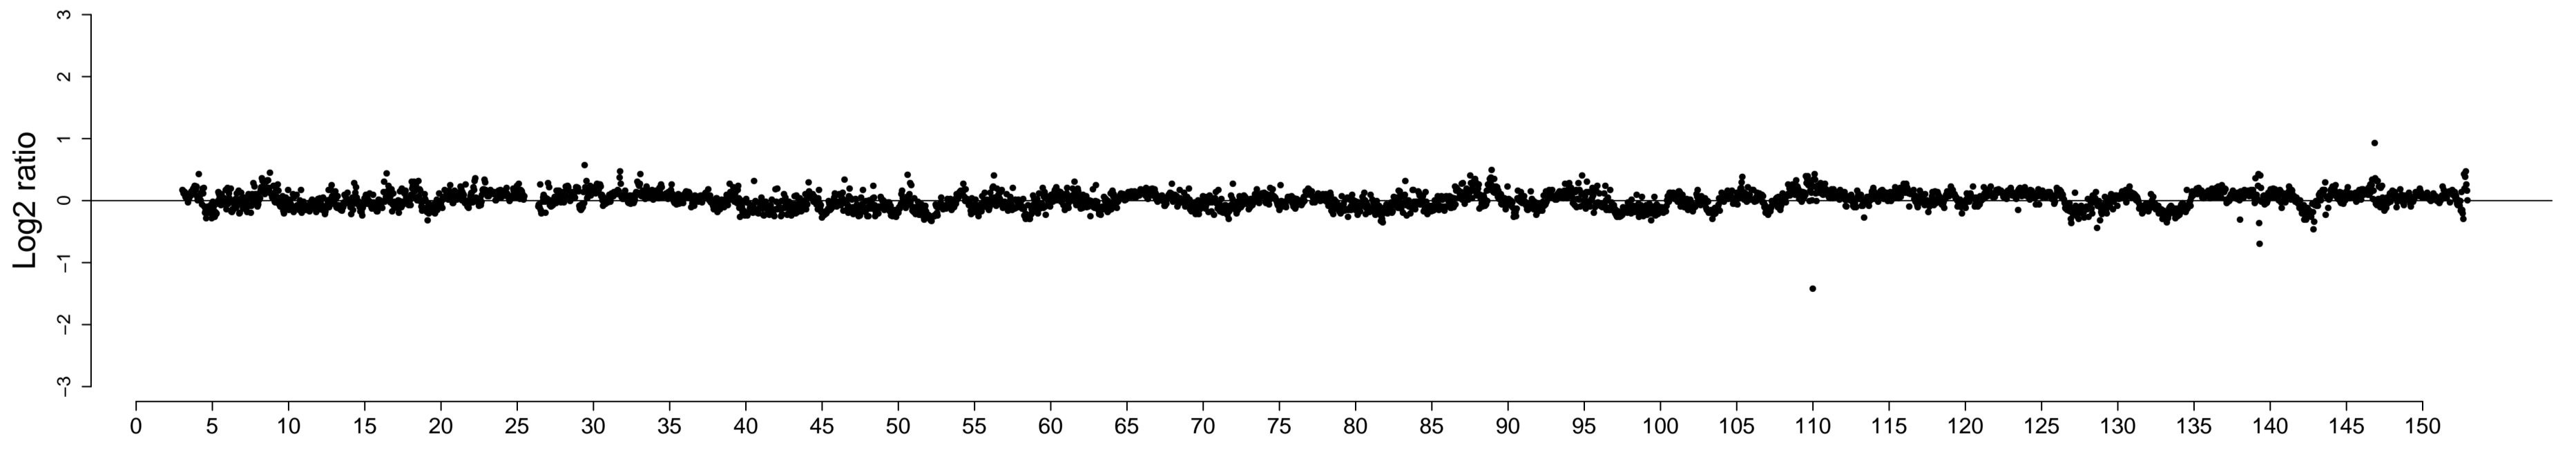

chr5:HTG2 p11

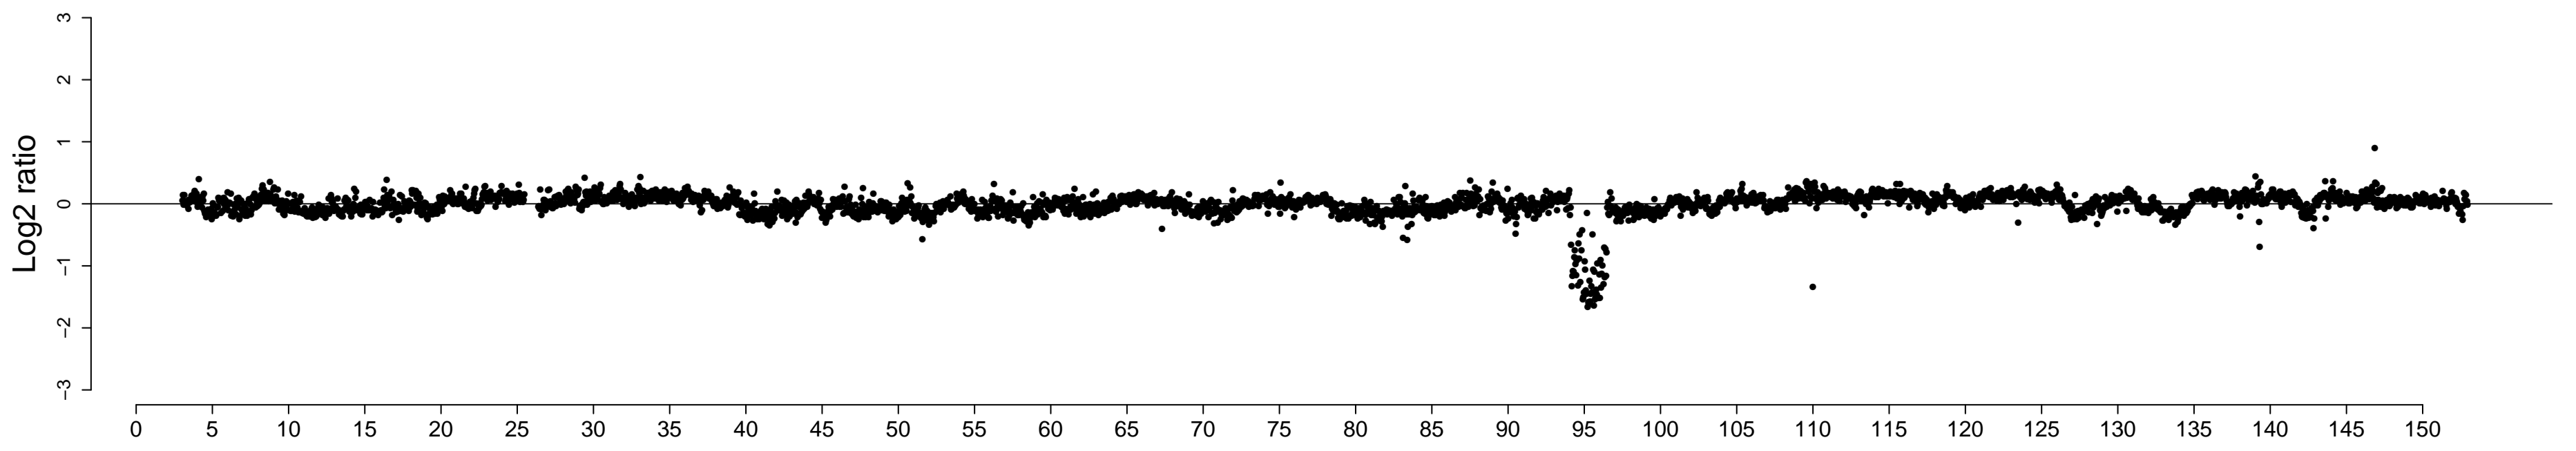

chr6:CBA control kidney

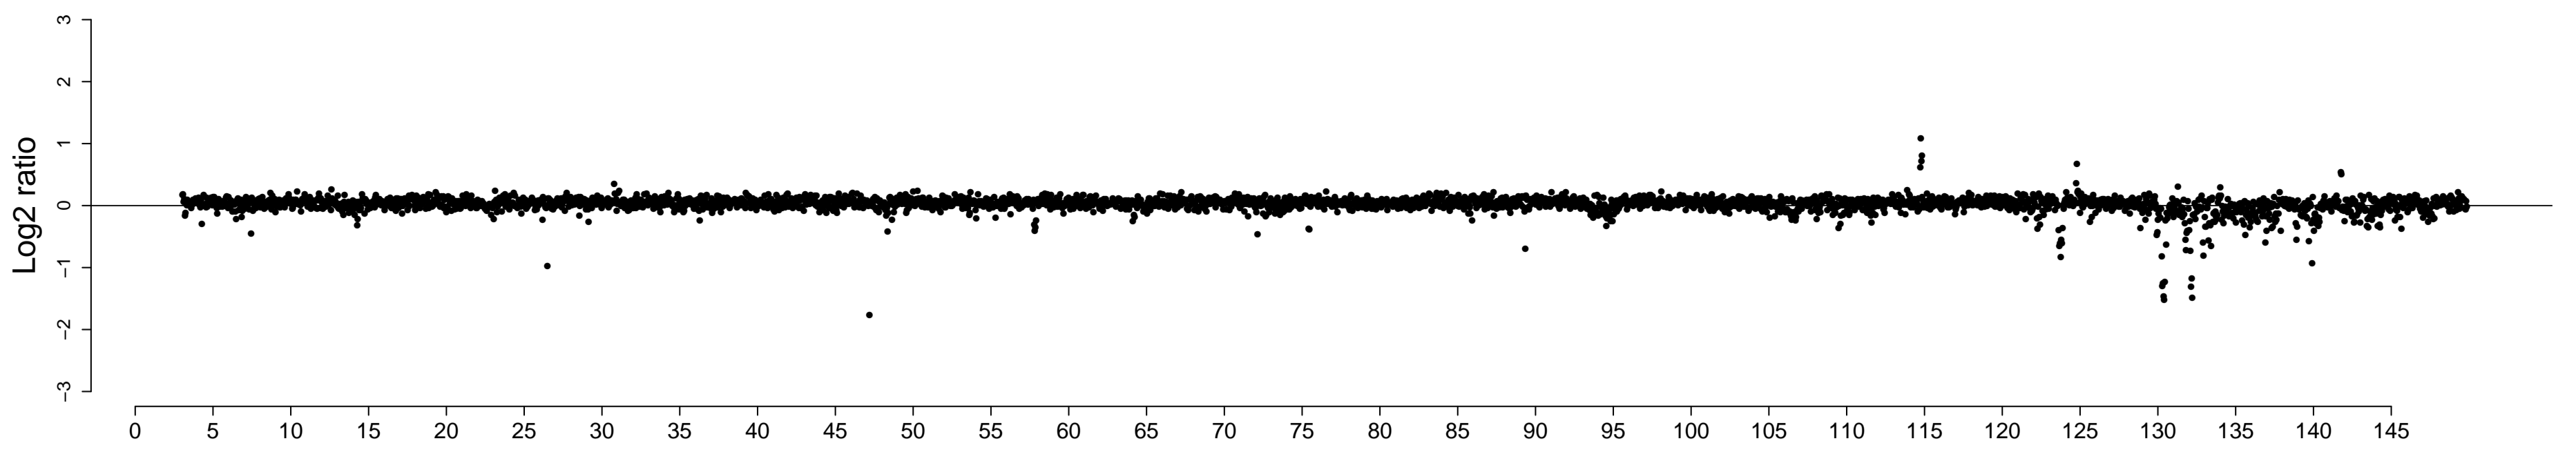

chr6:HAP1 p25

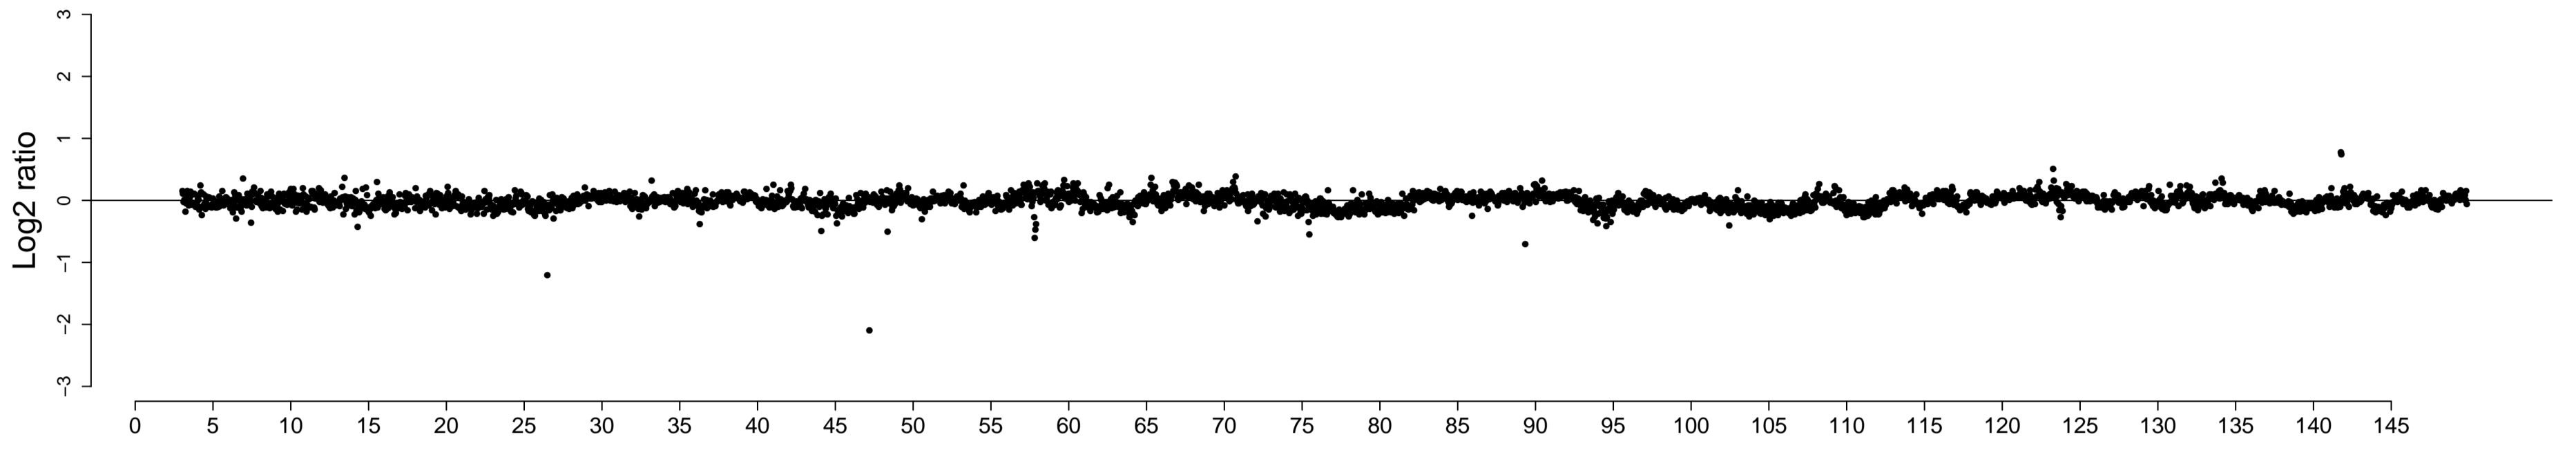

chr6:HAP2 p18

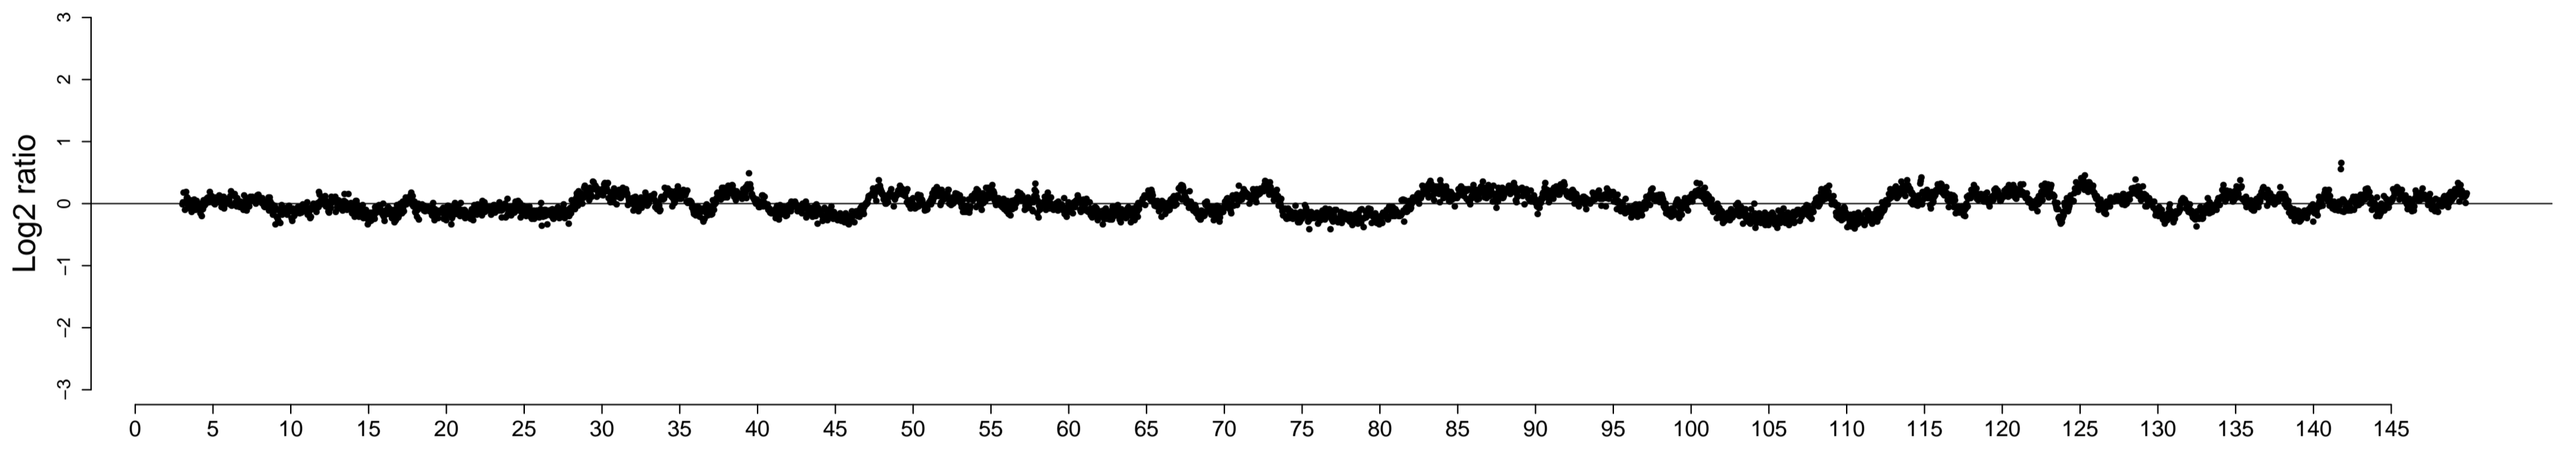

chr6:HTG\_control male kidney

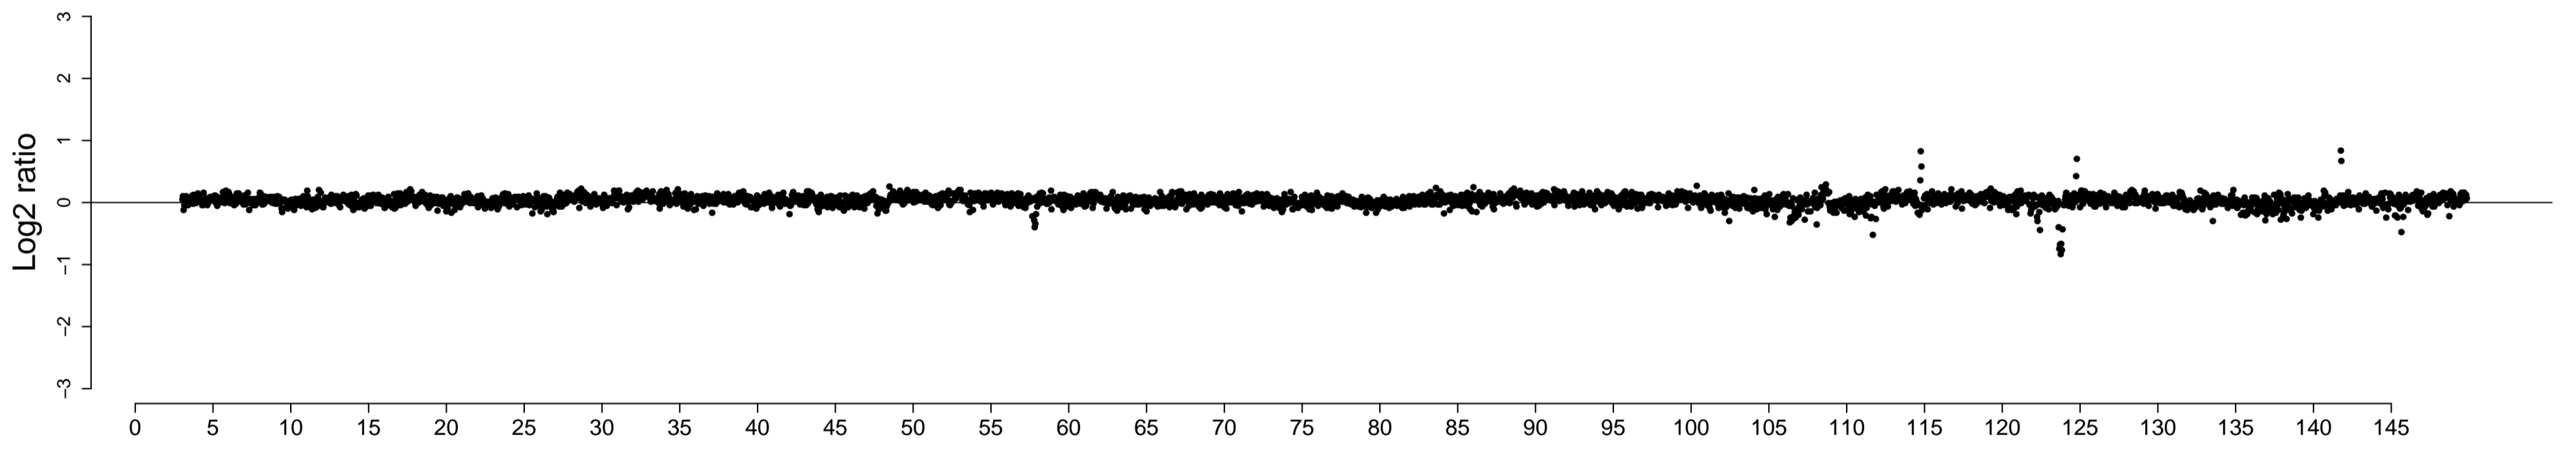

chr6:HTG1 p11

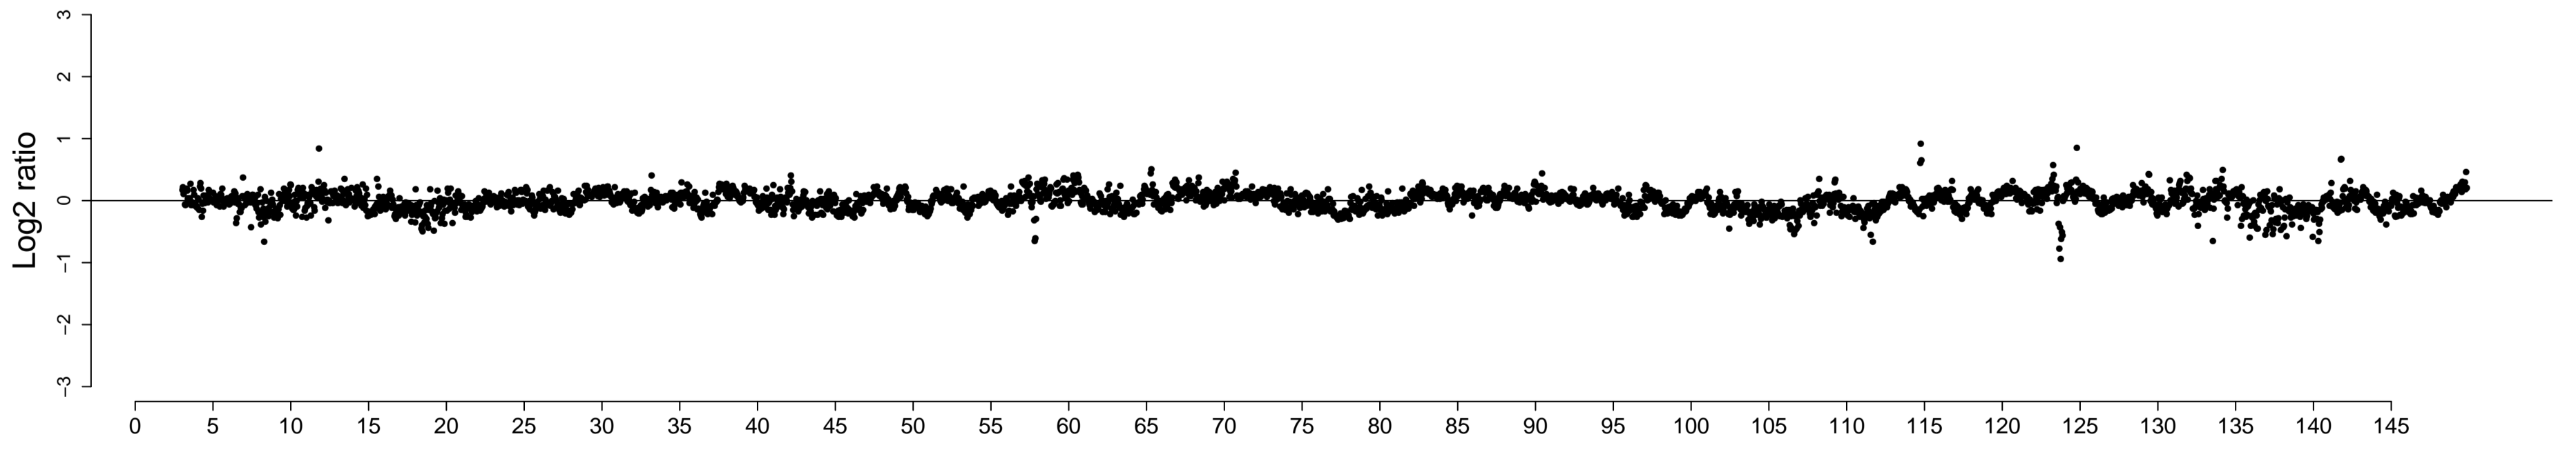

chr6:HTG2 p11

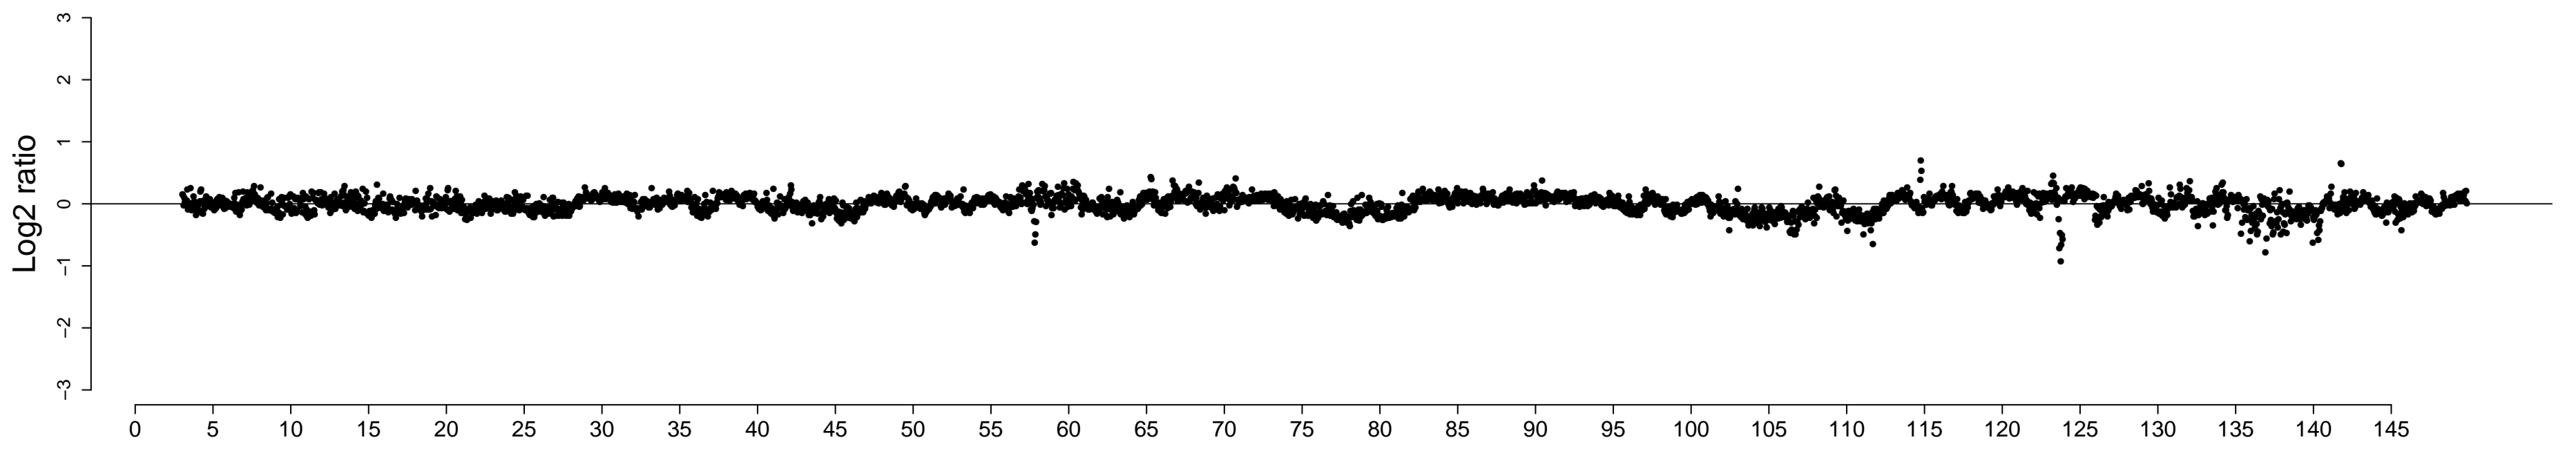

chr7:CBA control kidney

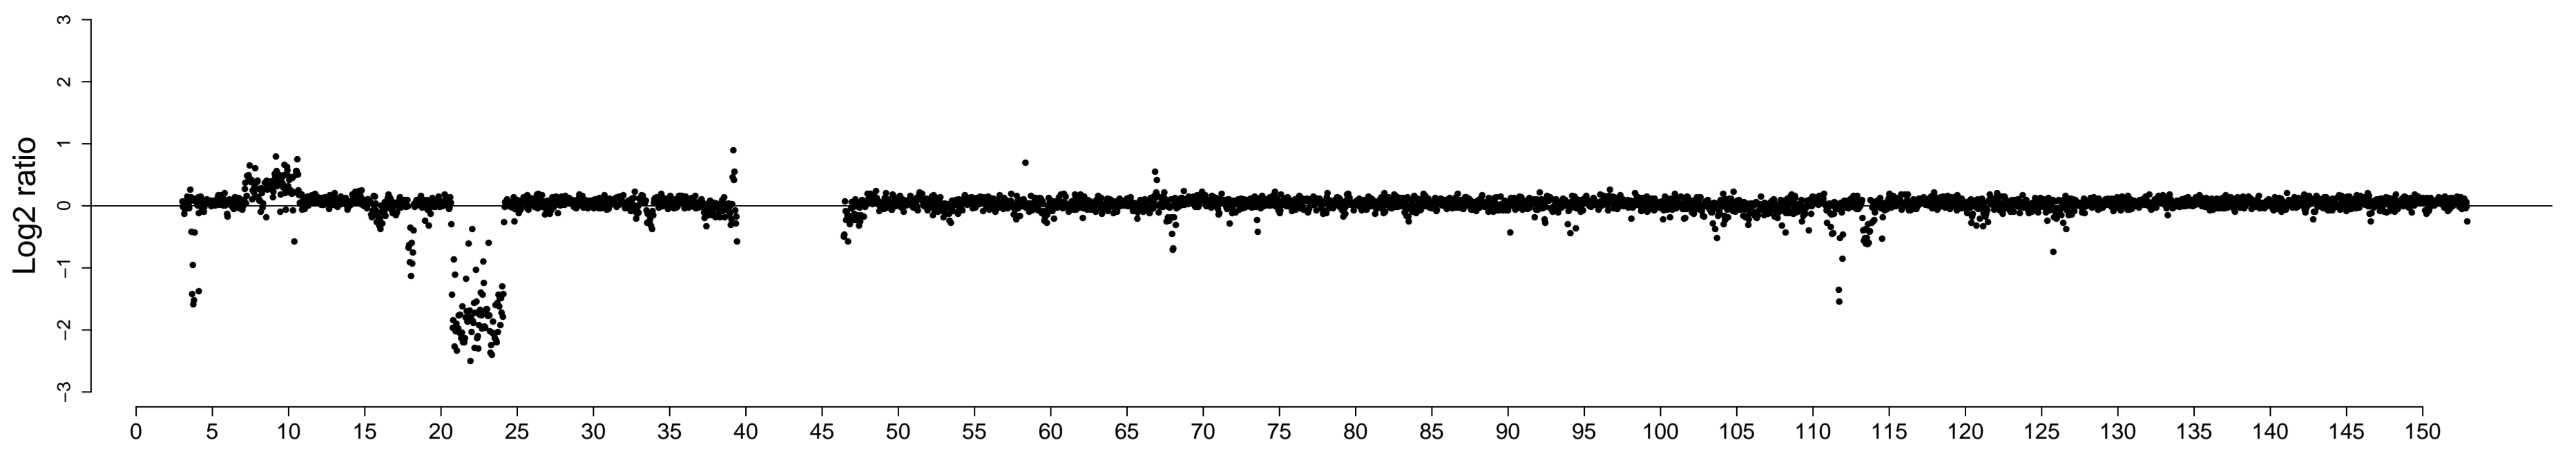

chr7:HAP1 p25

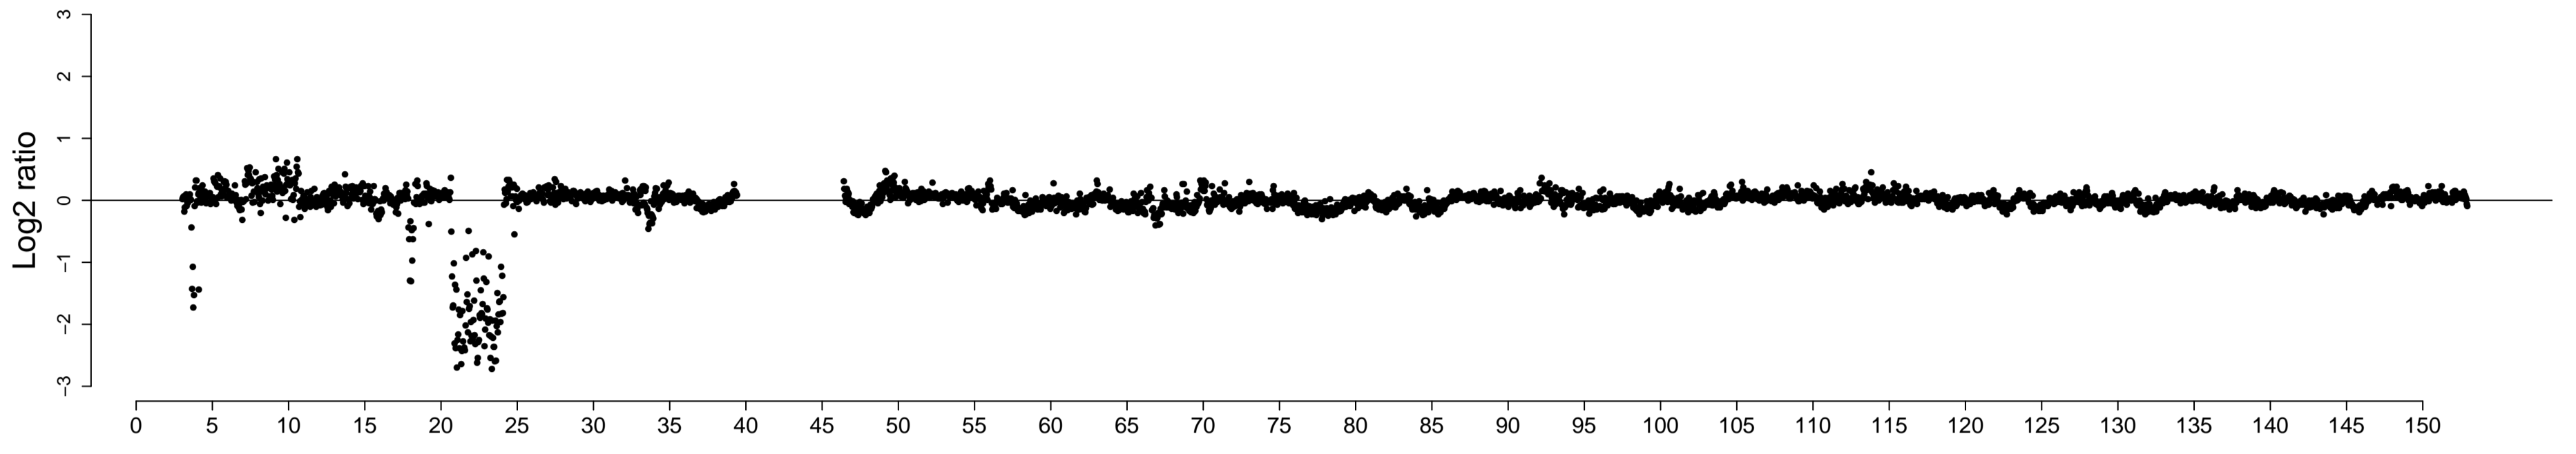

chr7:HAP2 p18

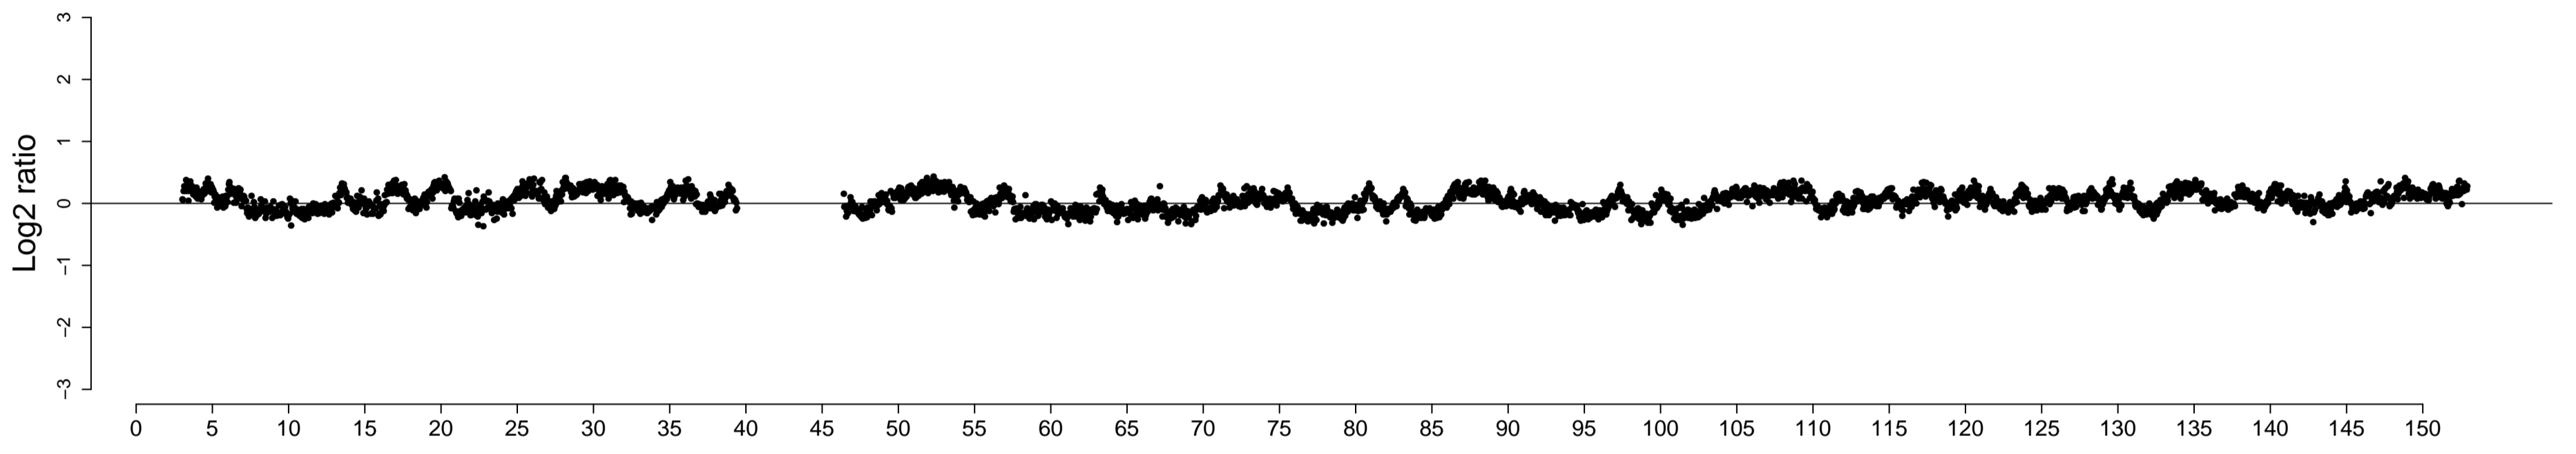

chr7:HTG\_control male kidney

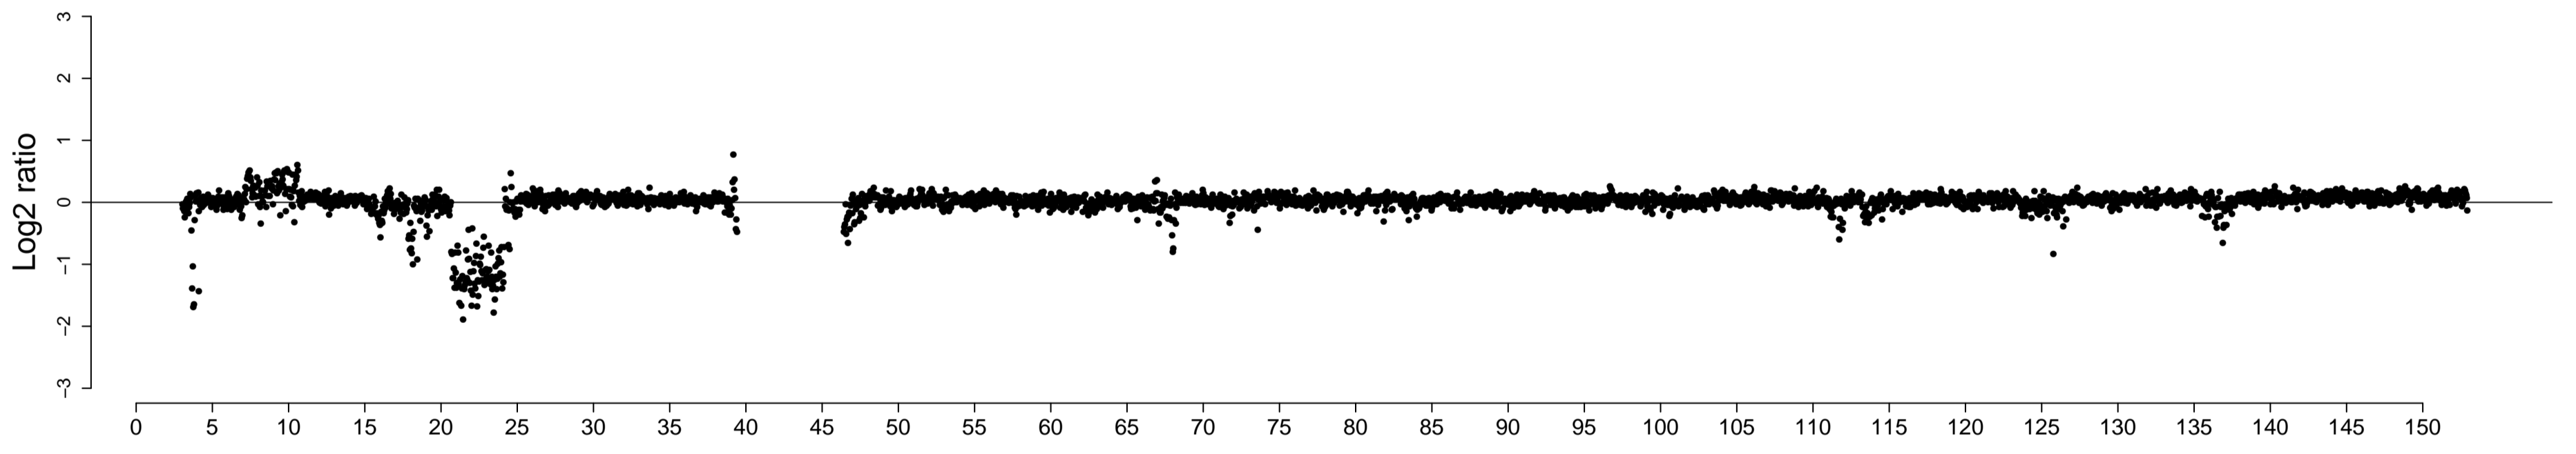

chr7:HTG1 p11

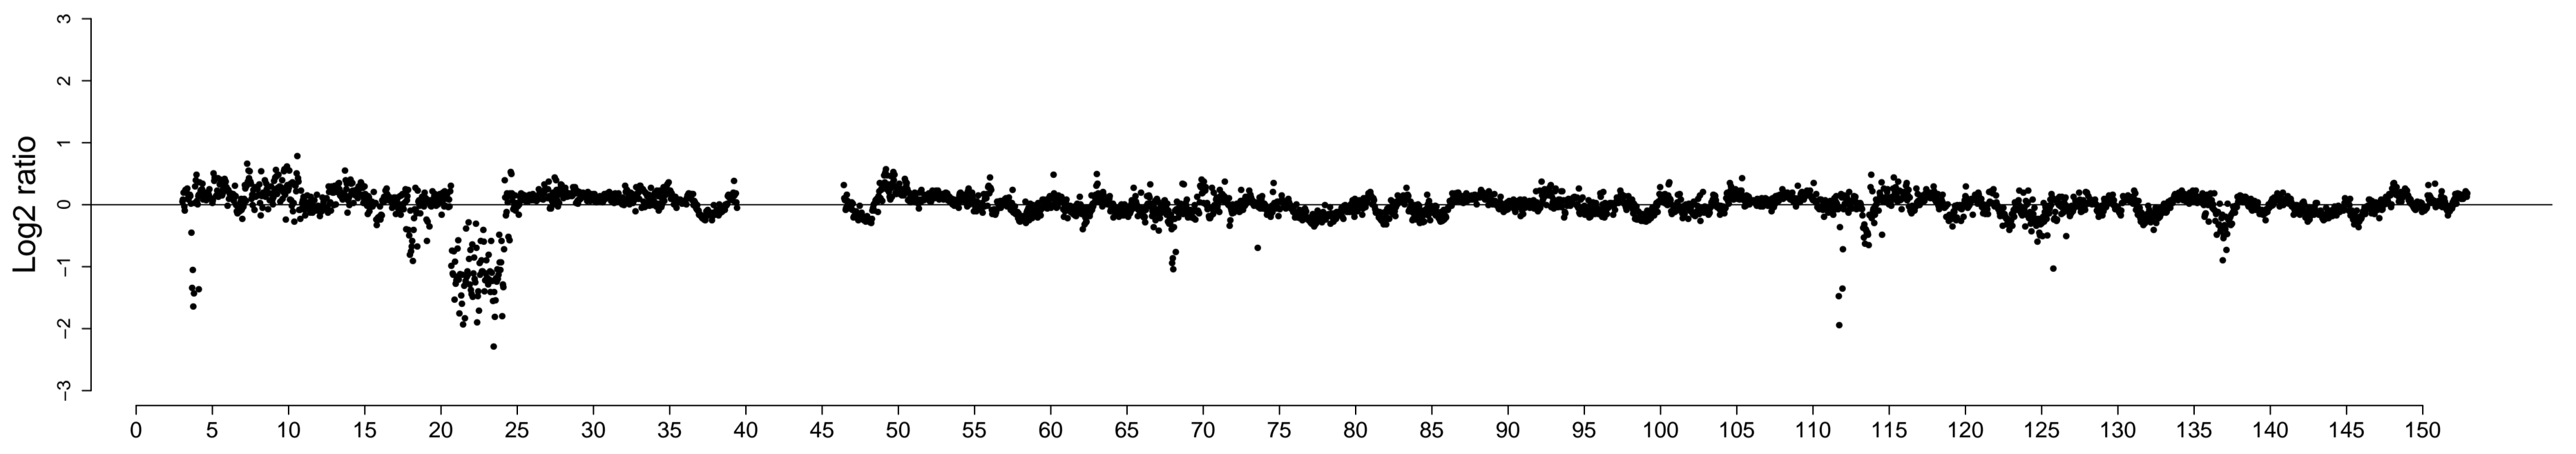

chr7:HTG2 p11

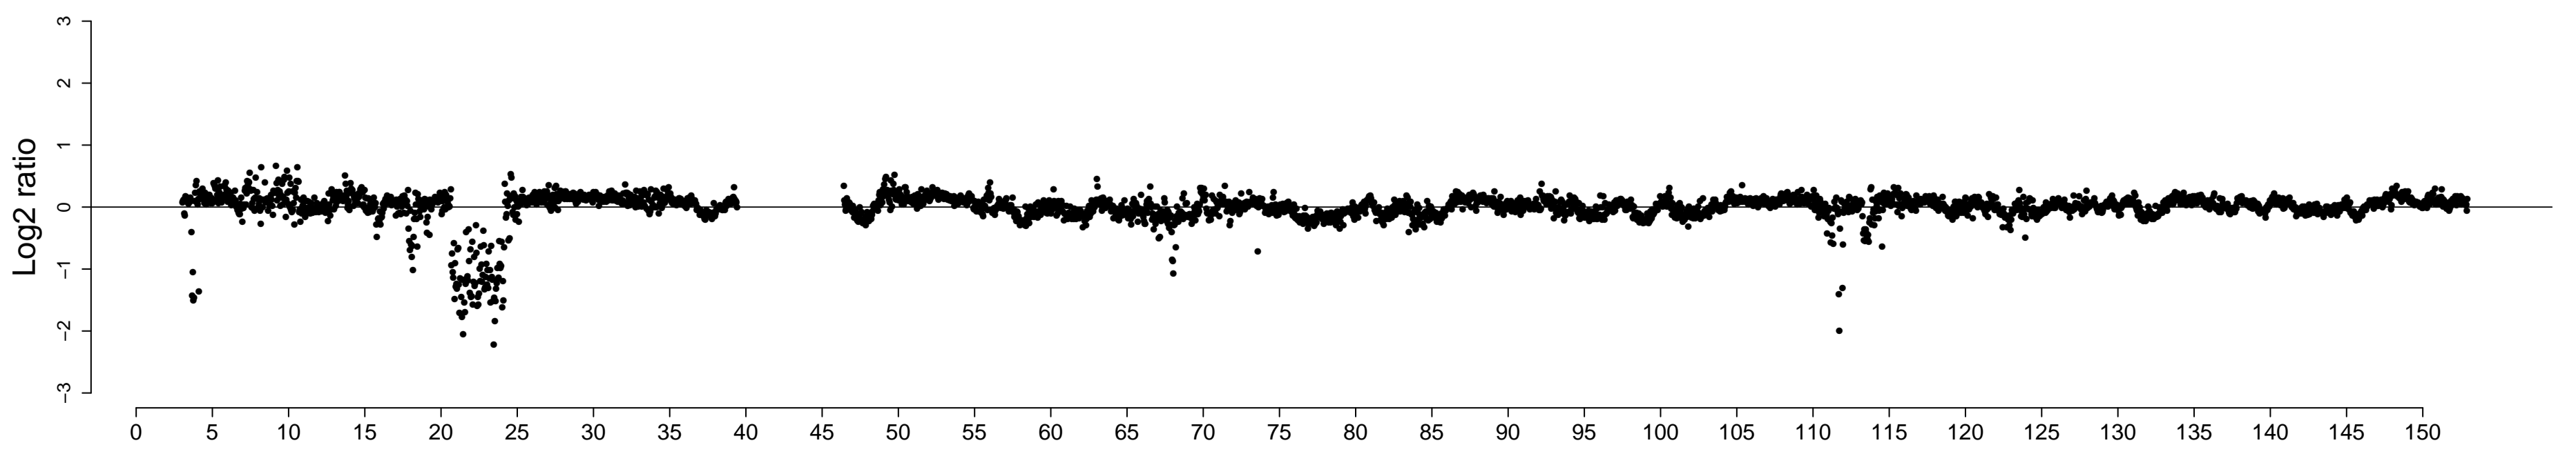

chr8:CBA control kidney

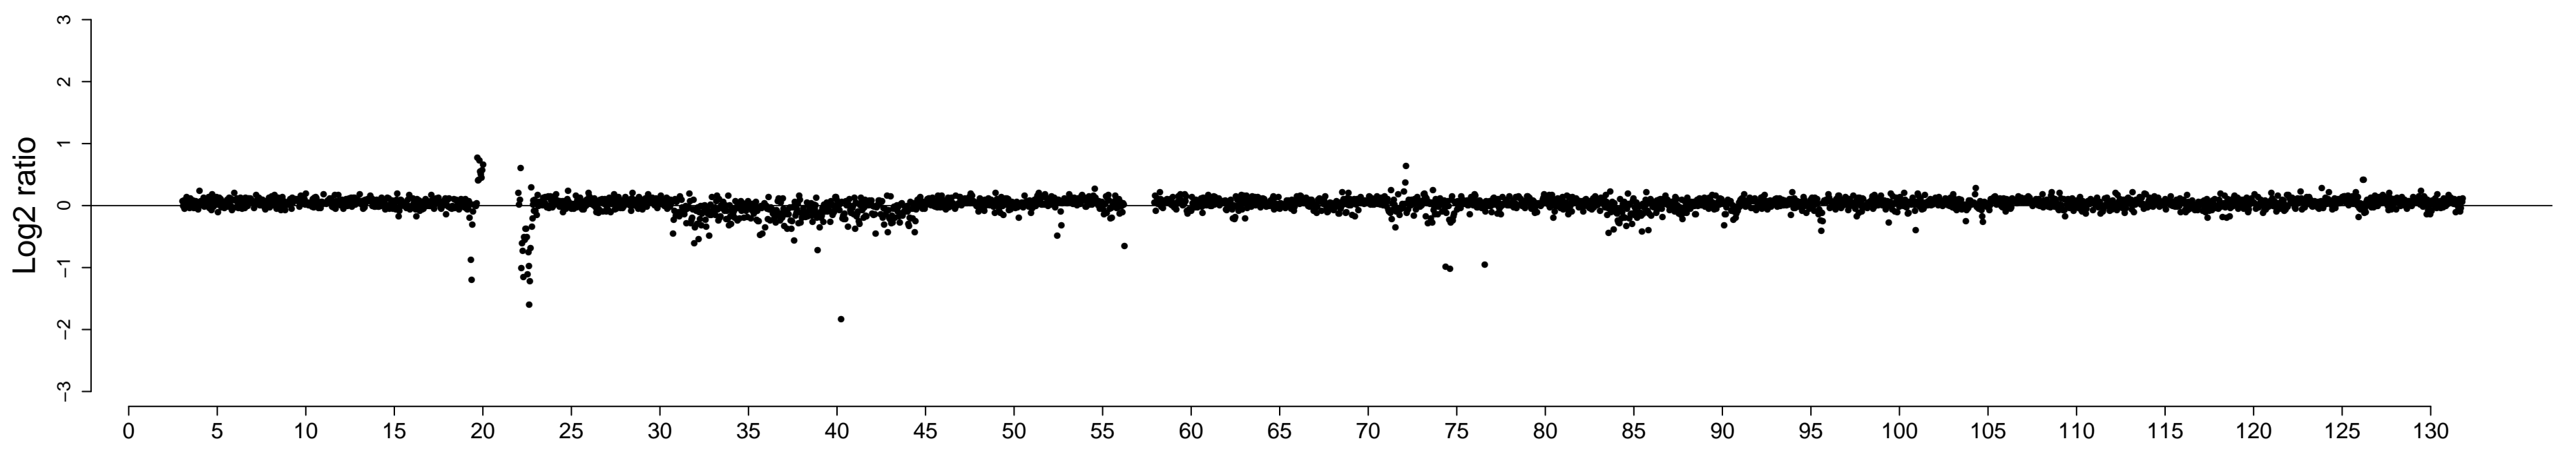

chr8:HAP1 p25

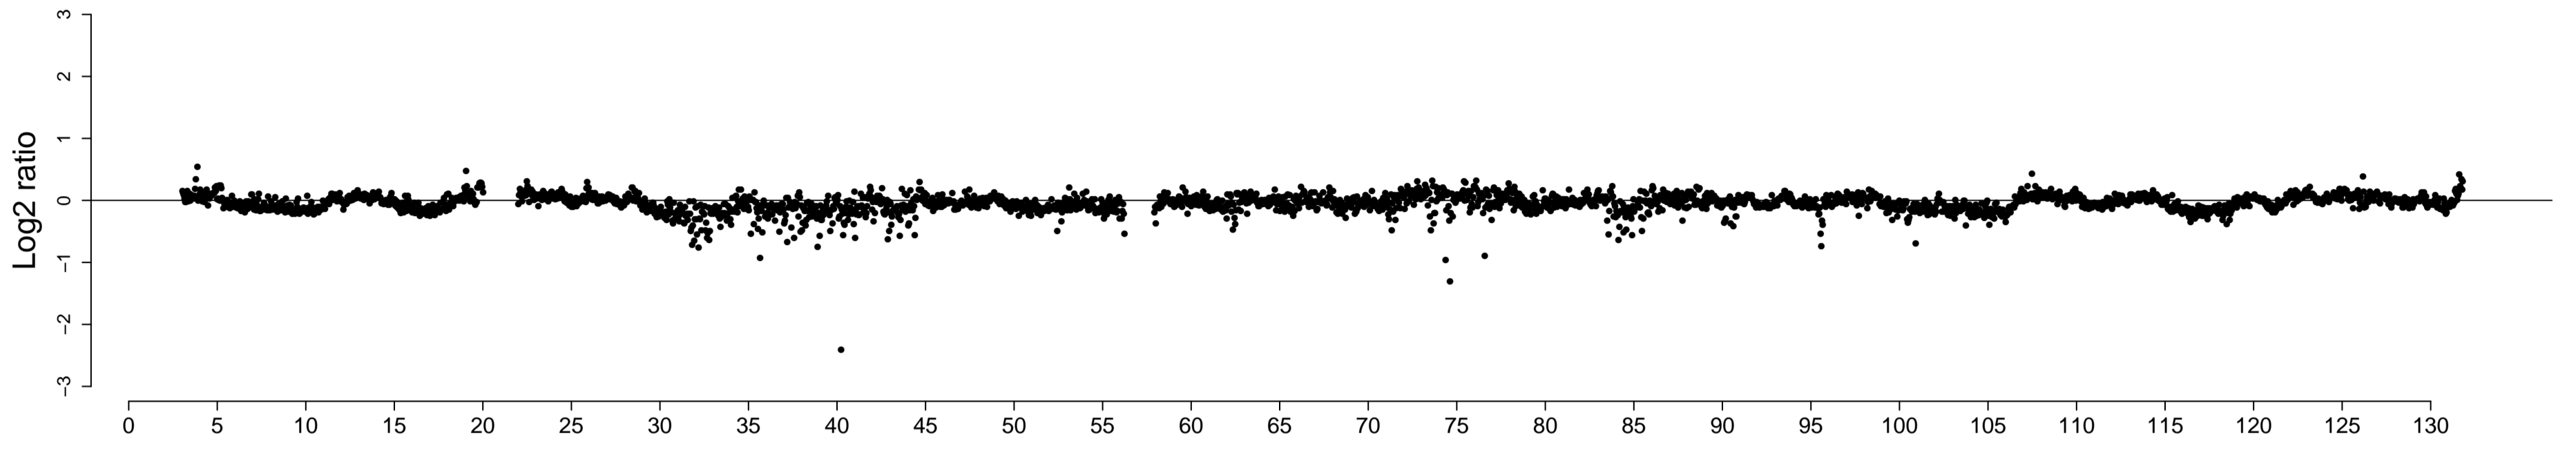

chr8:HAP2 p18

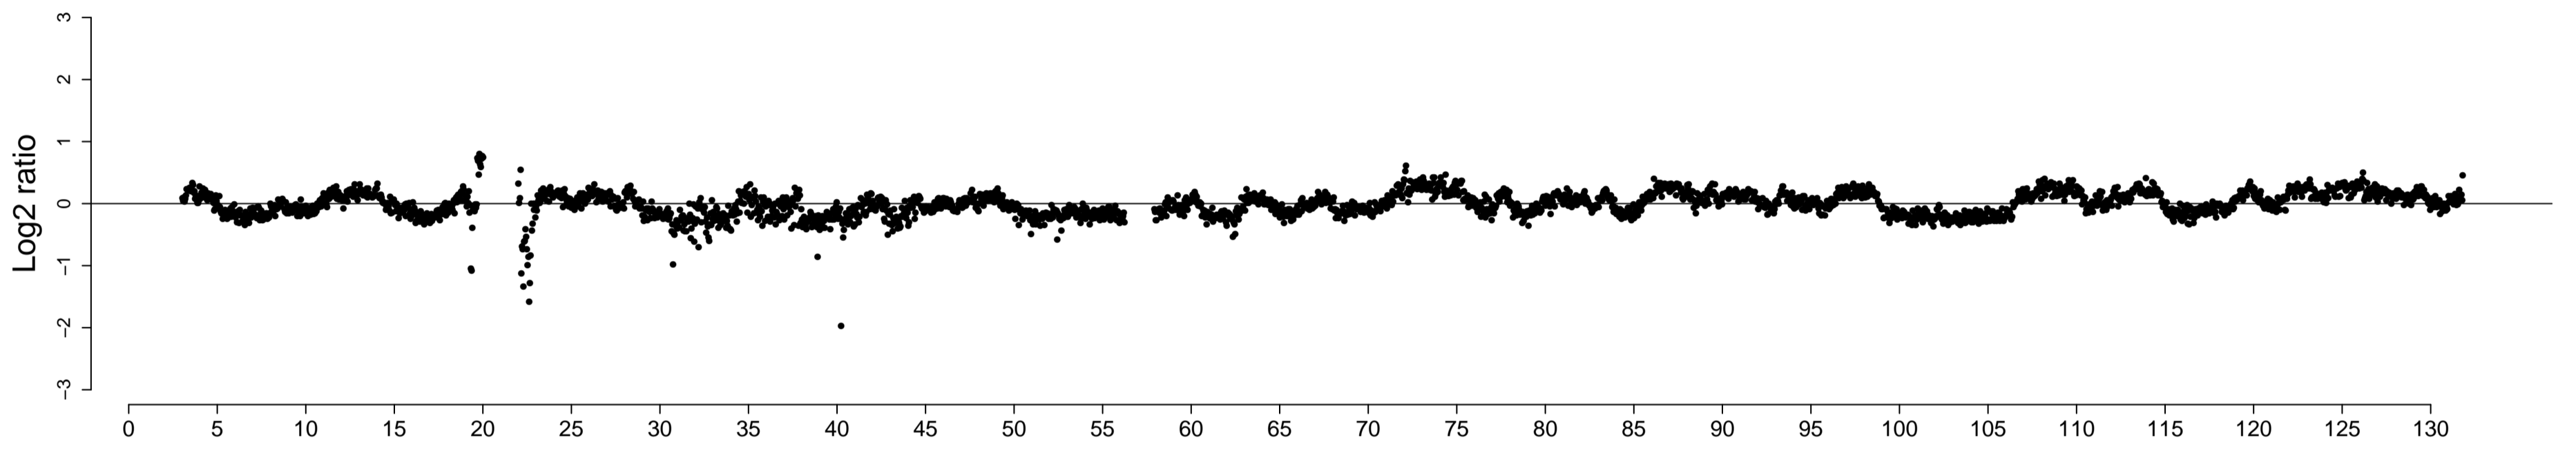

chr8:HTG\_control male kidney

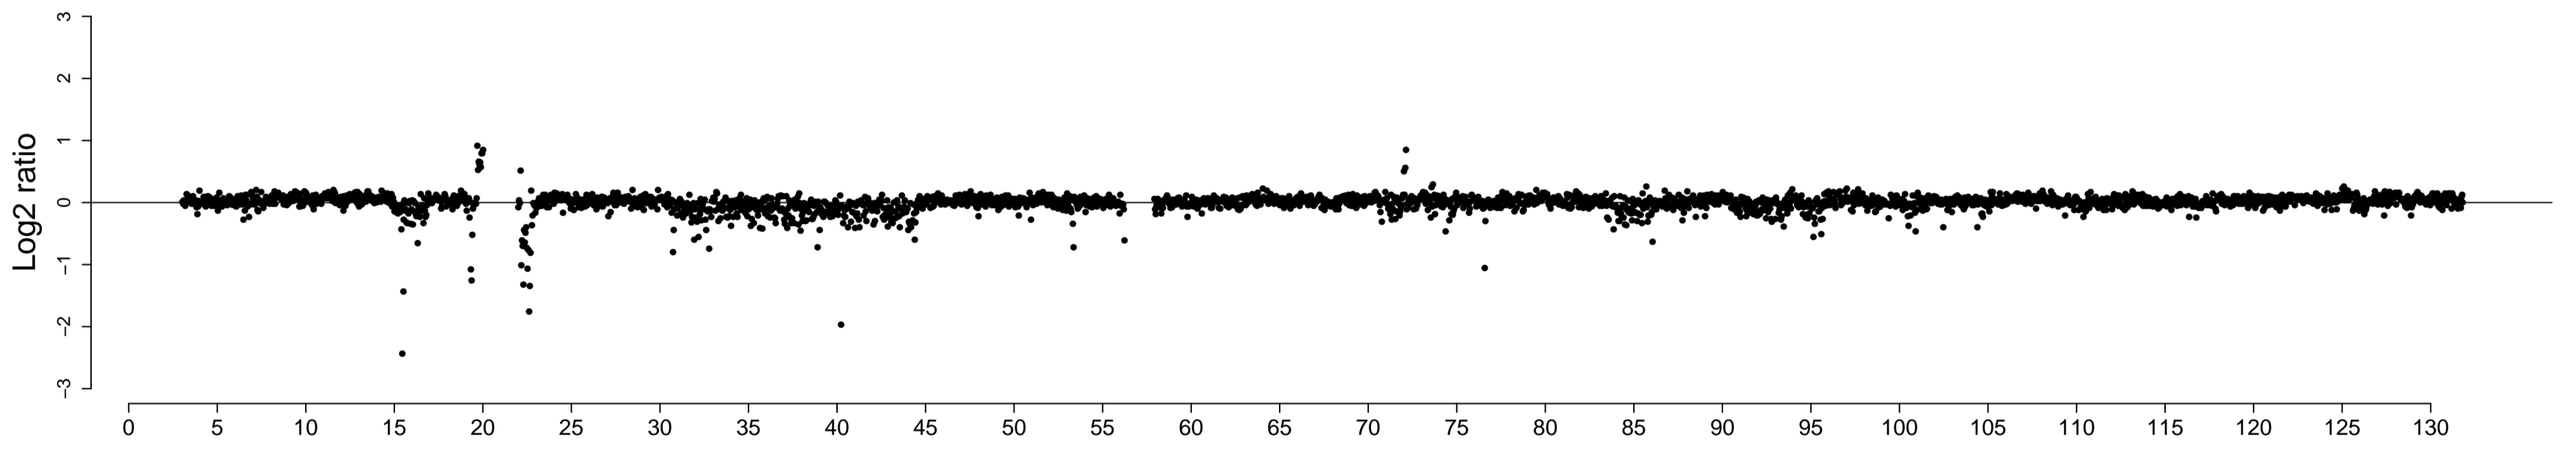

chr8:HTG1 p11

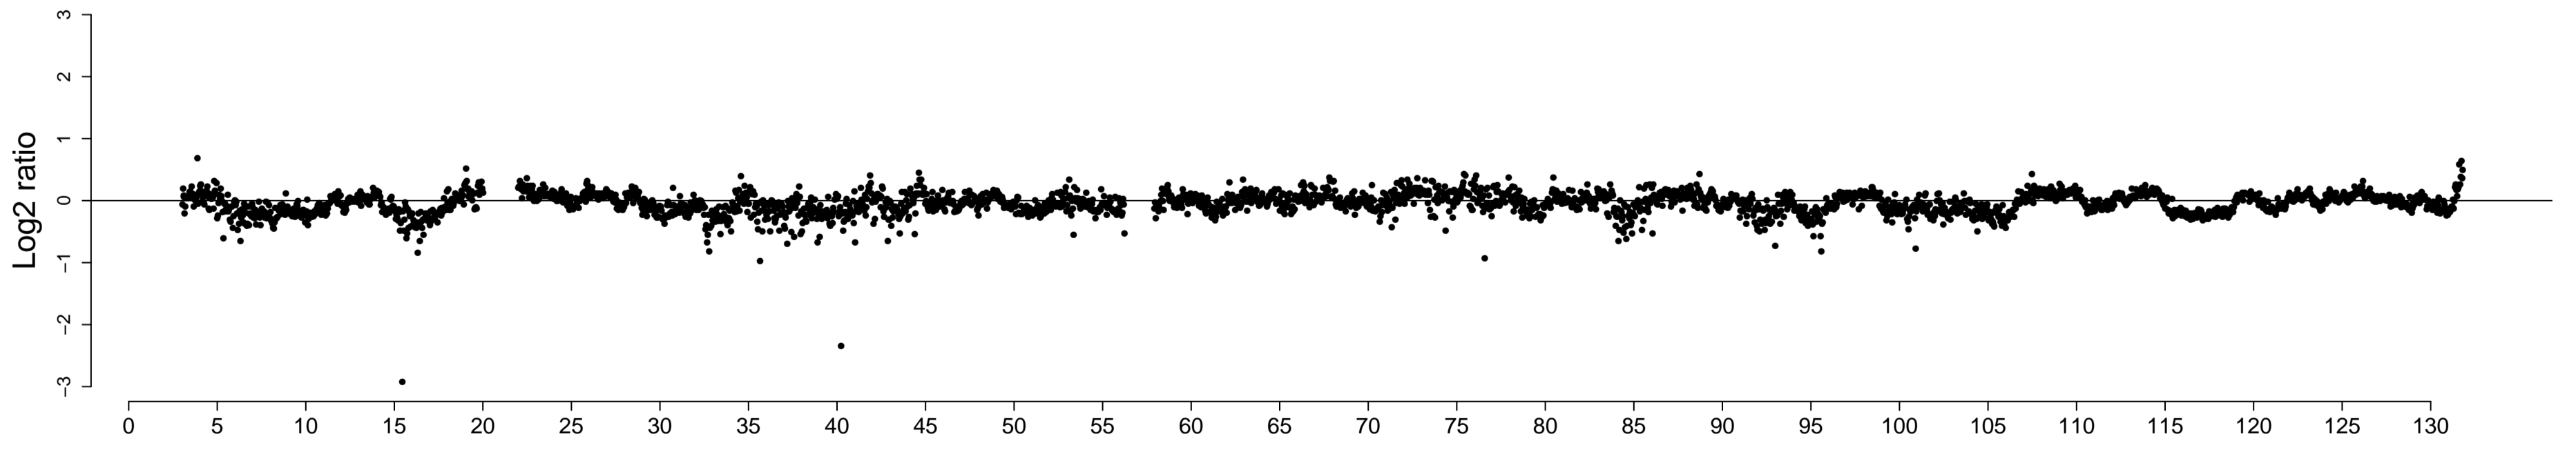

chr8:HTG2 p11

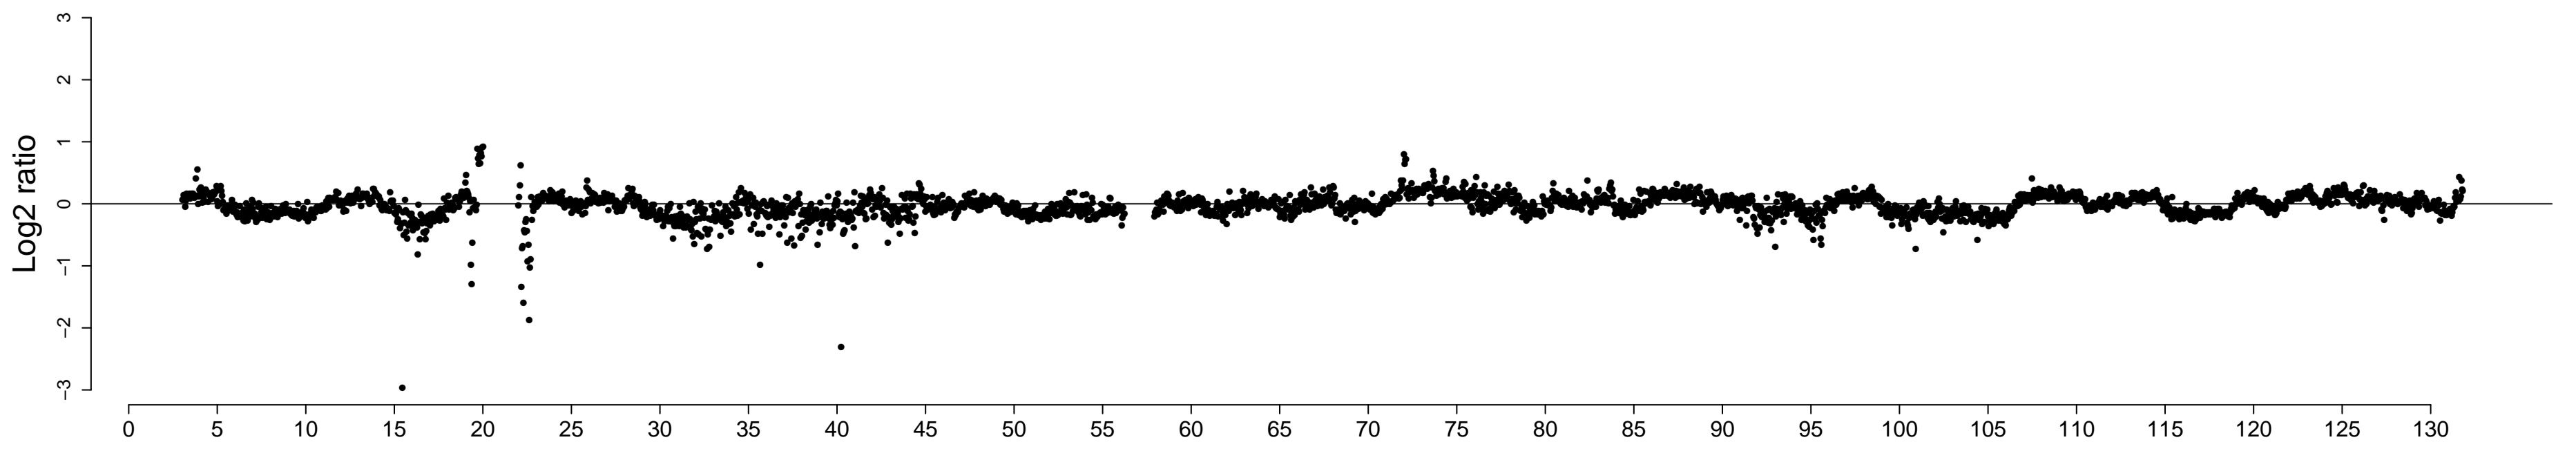

chr9:CBA control kidney

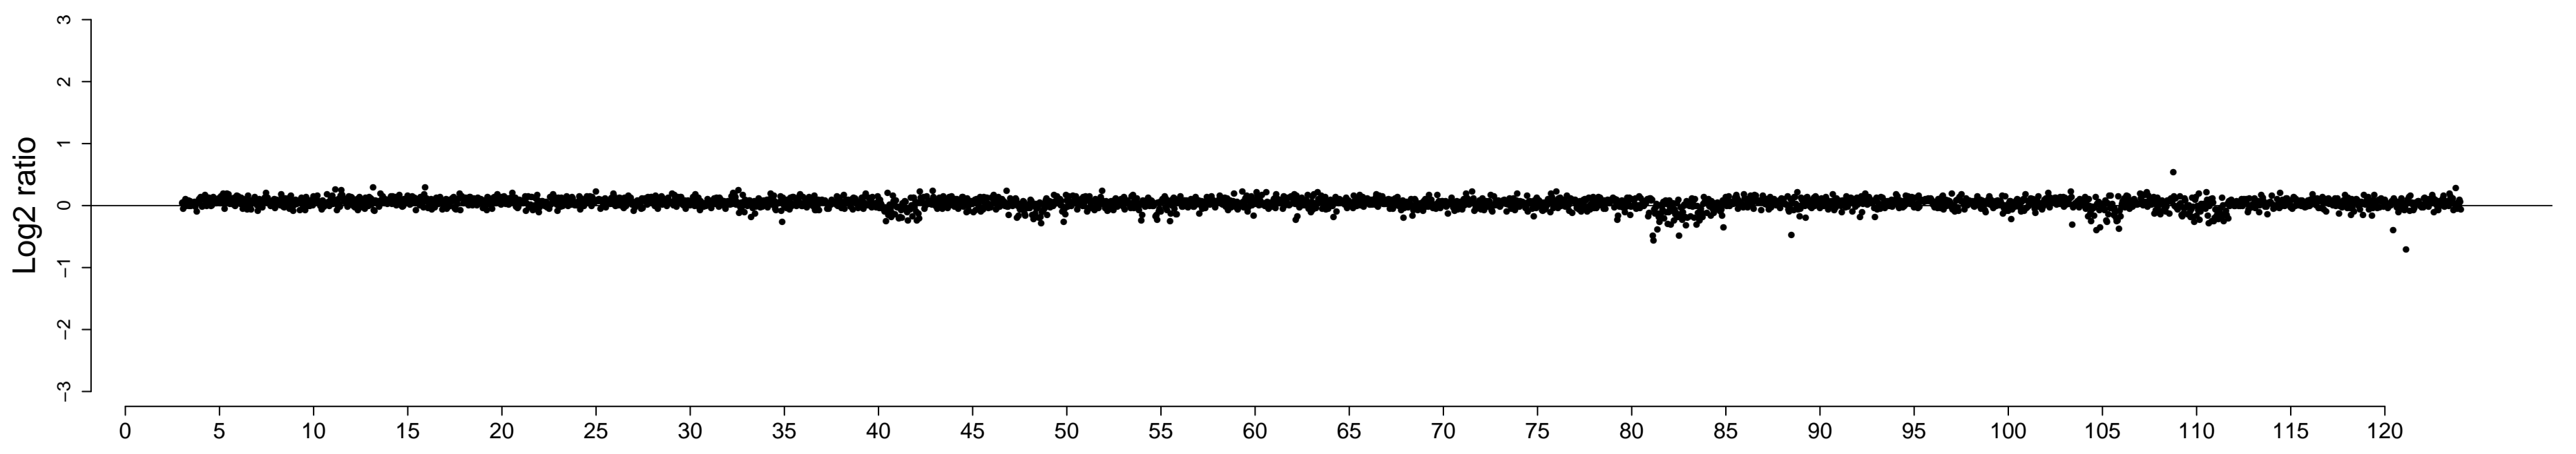

chr9:HAP1 p25

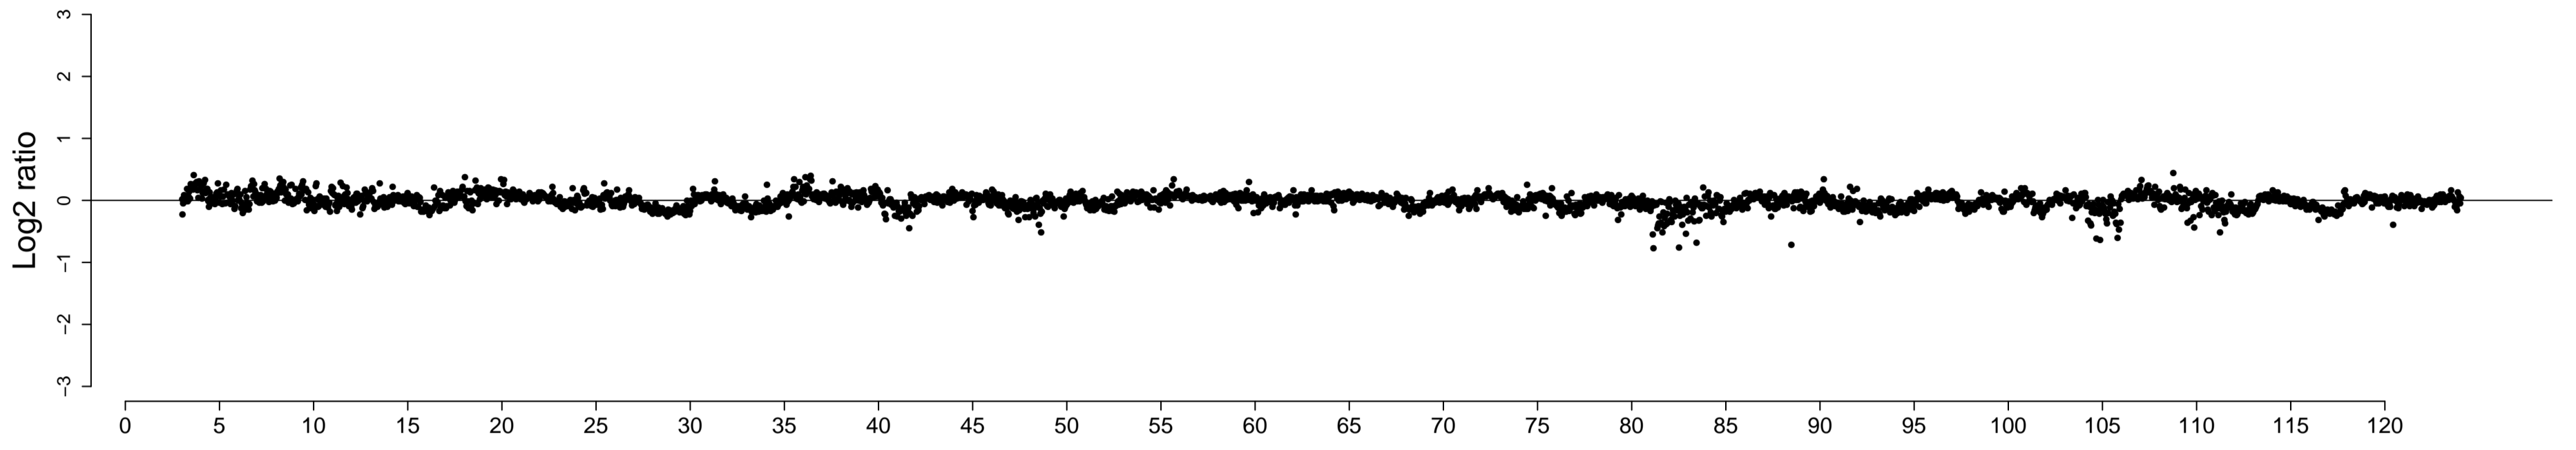

chr9:HAP2 p18

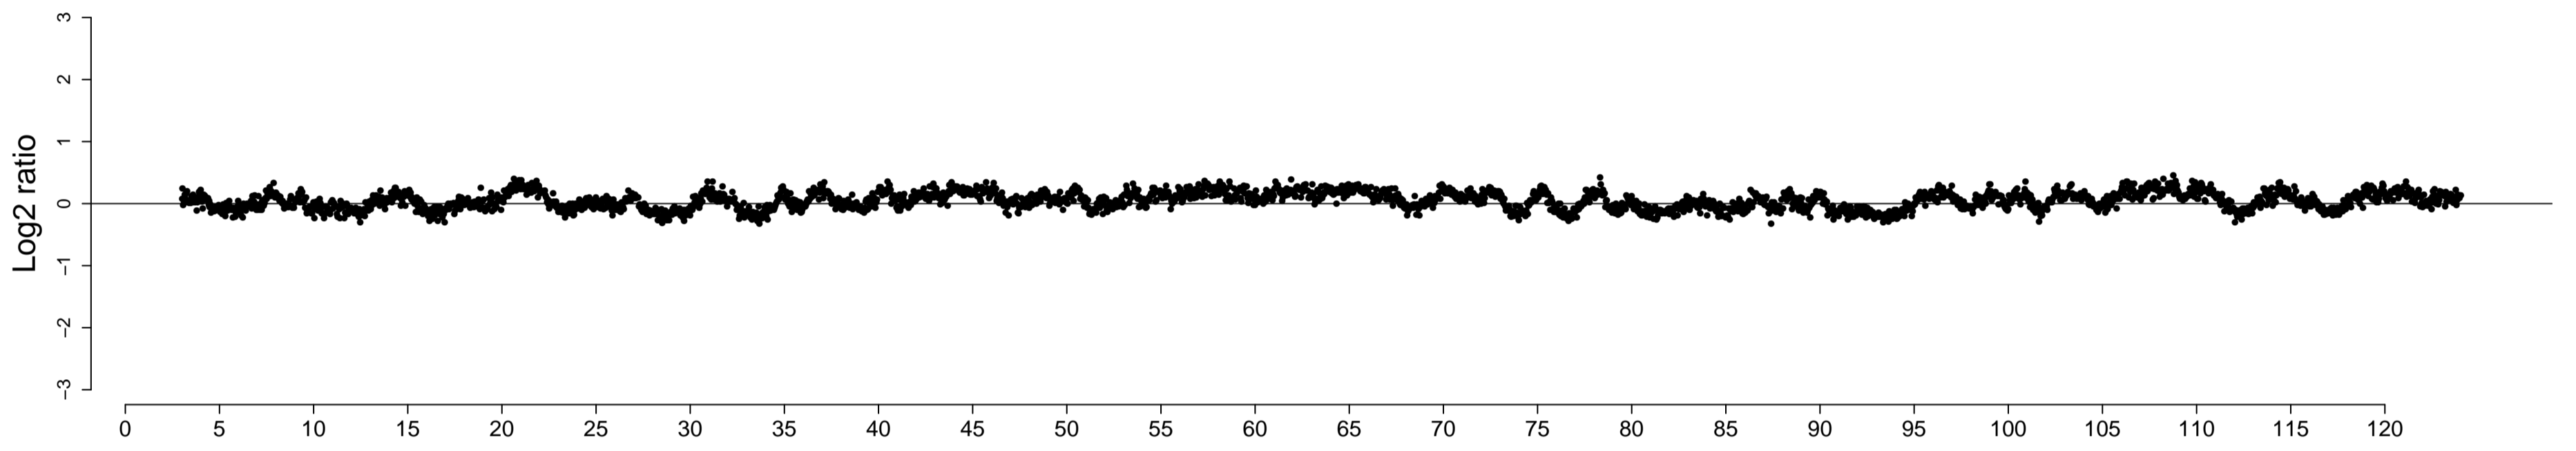

chr9:HTG\_control male kidney

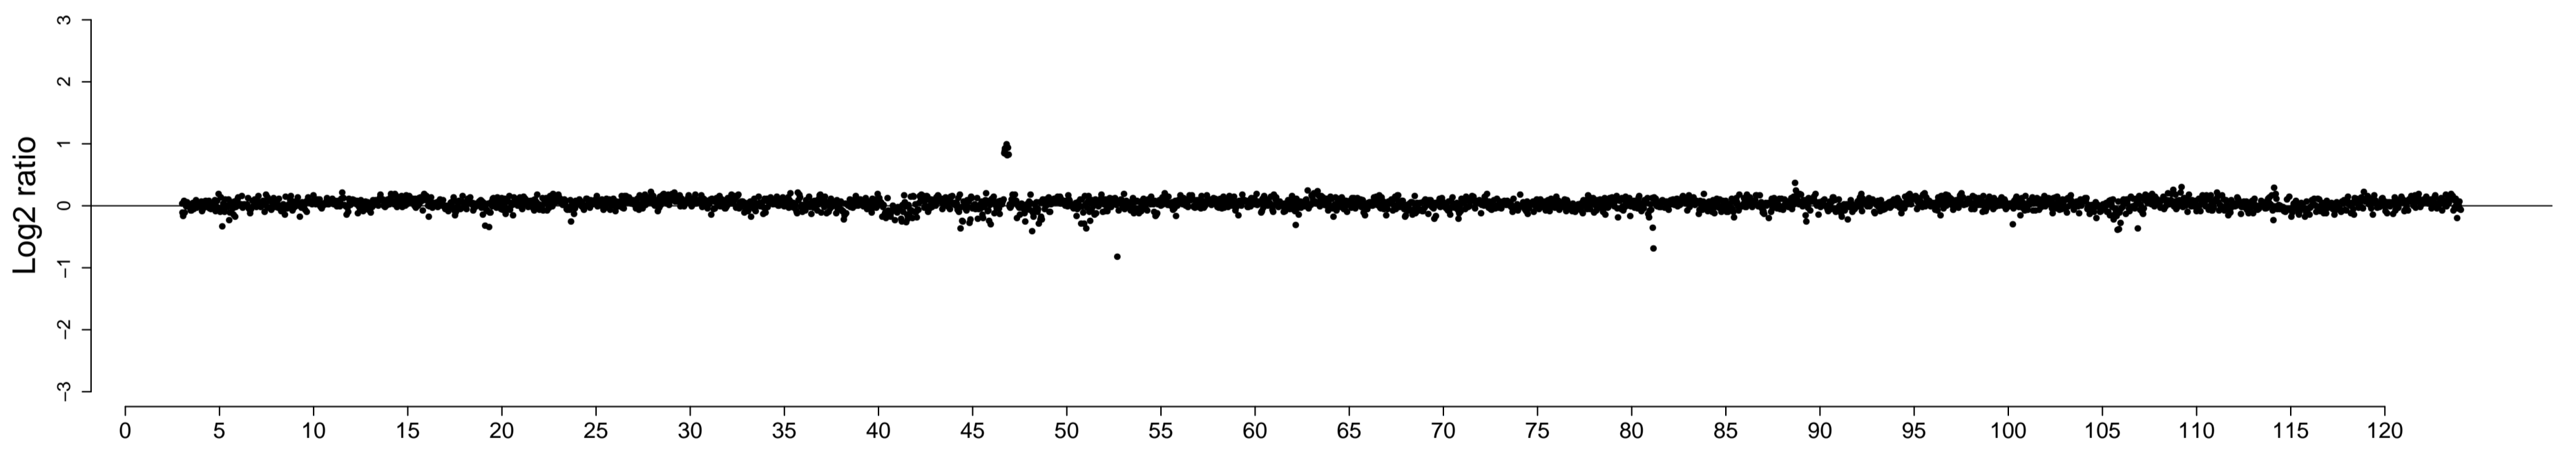

chr9:HTG1 p11

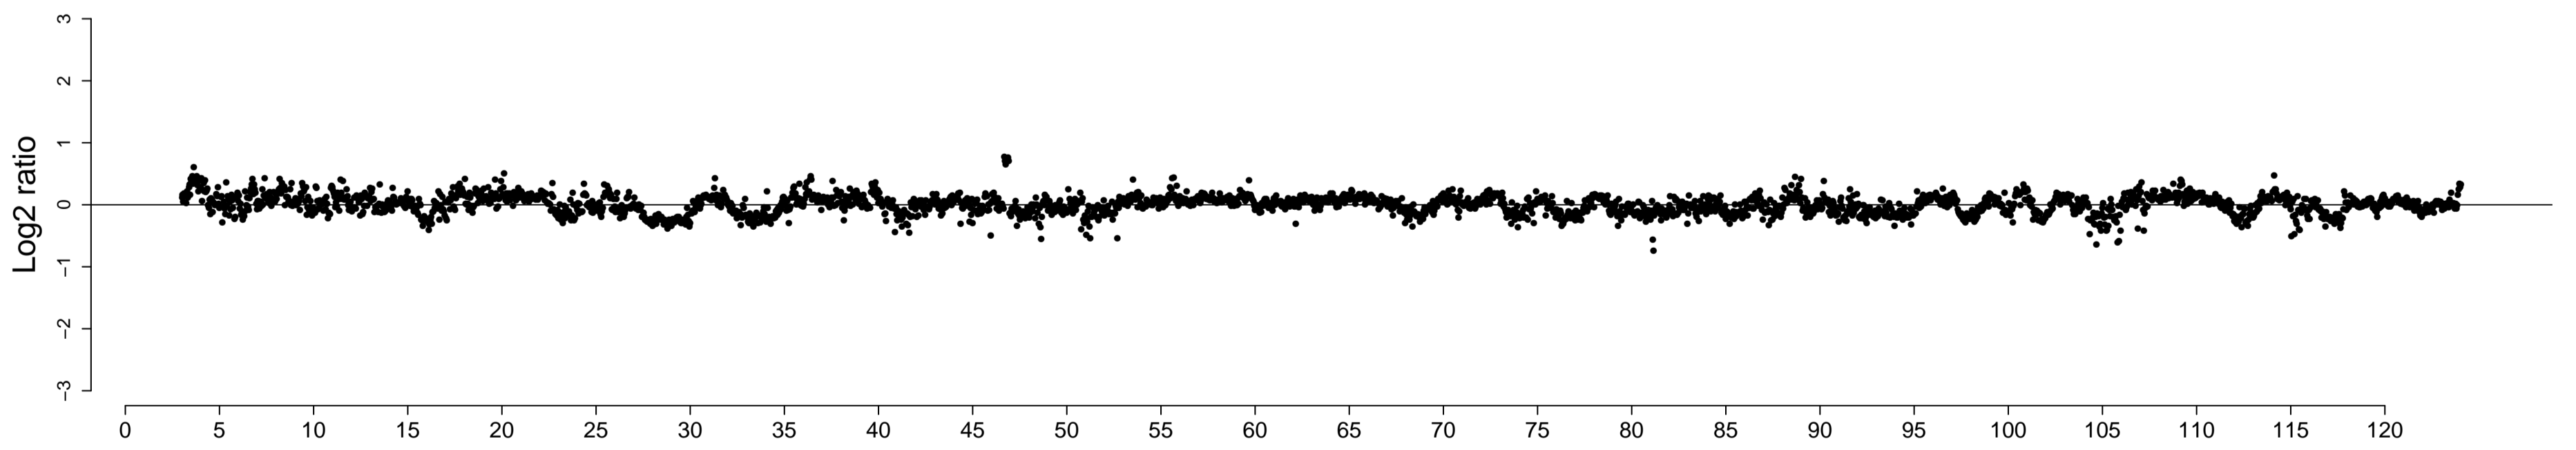

chr9:HTG2 p11

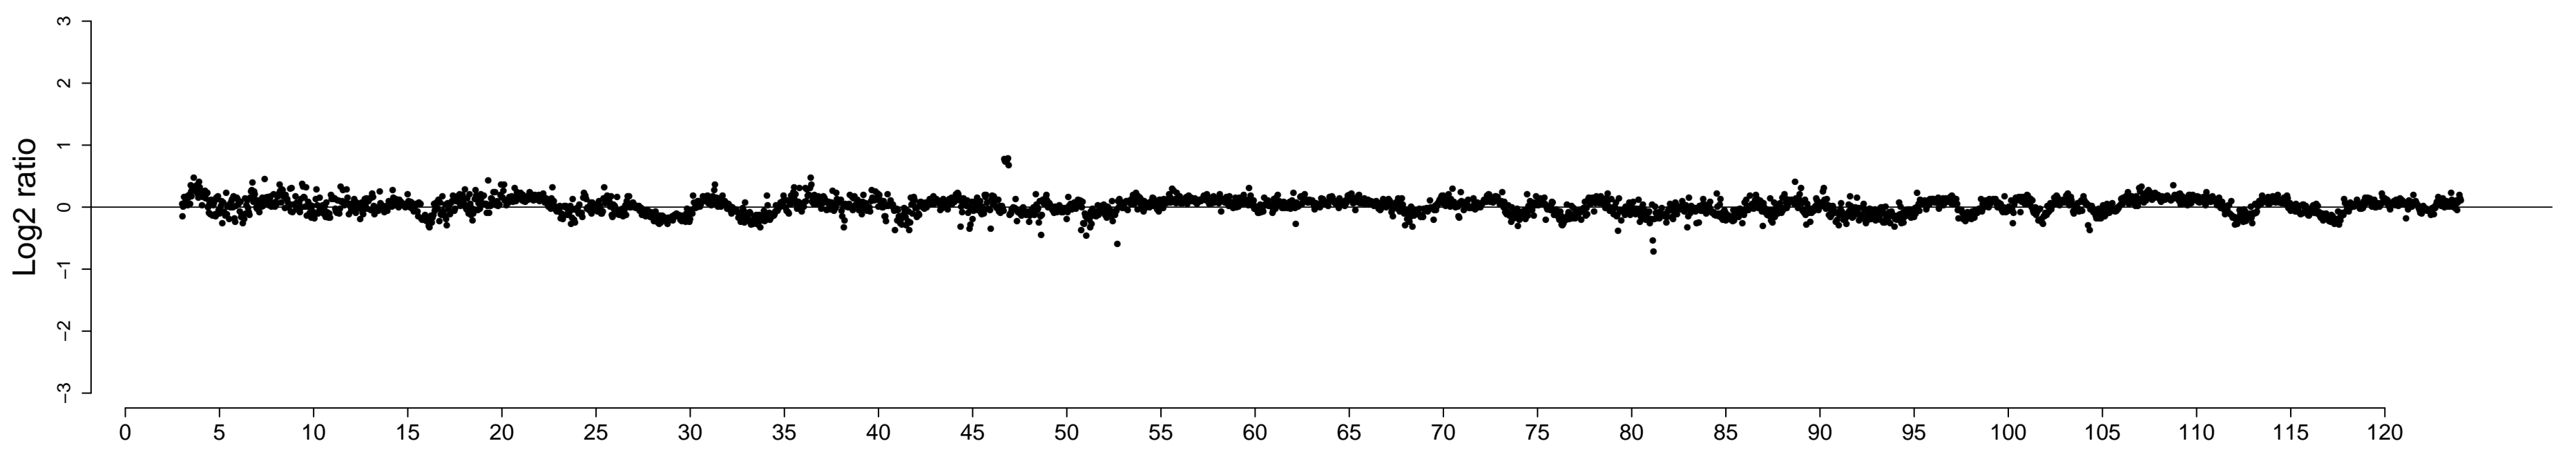

chr10:CBA control kidney

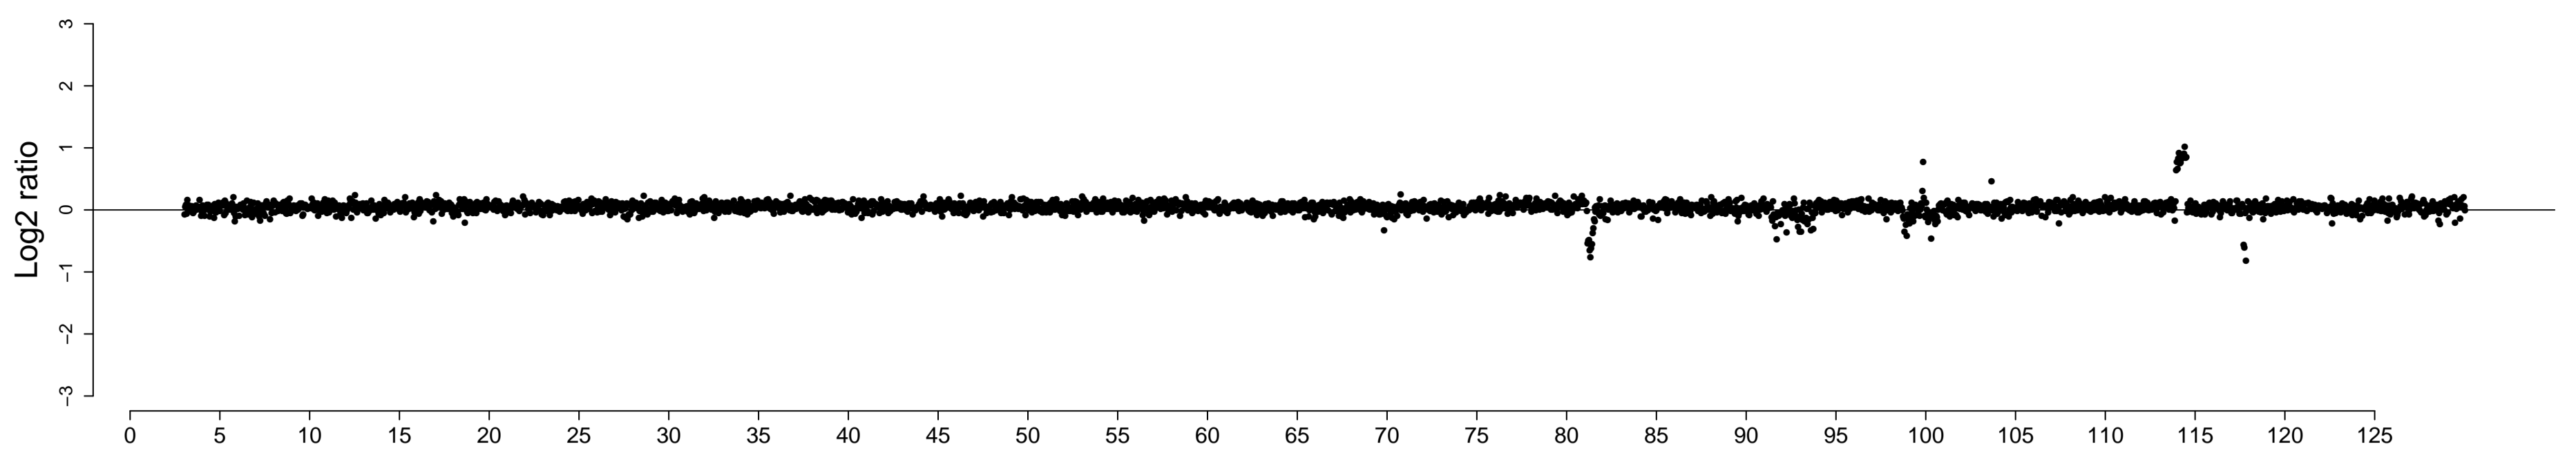

chr10:HAP1 p25

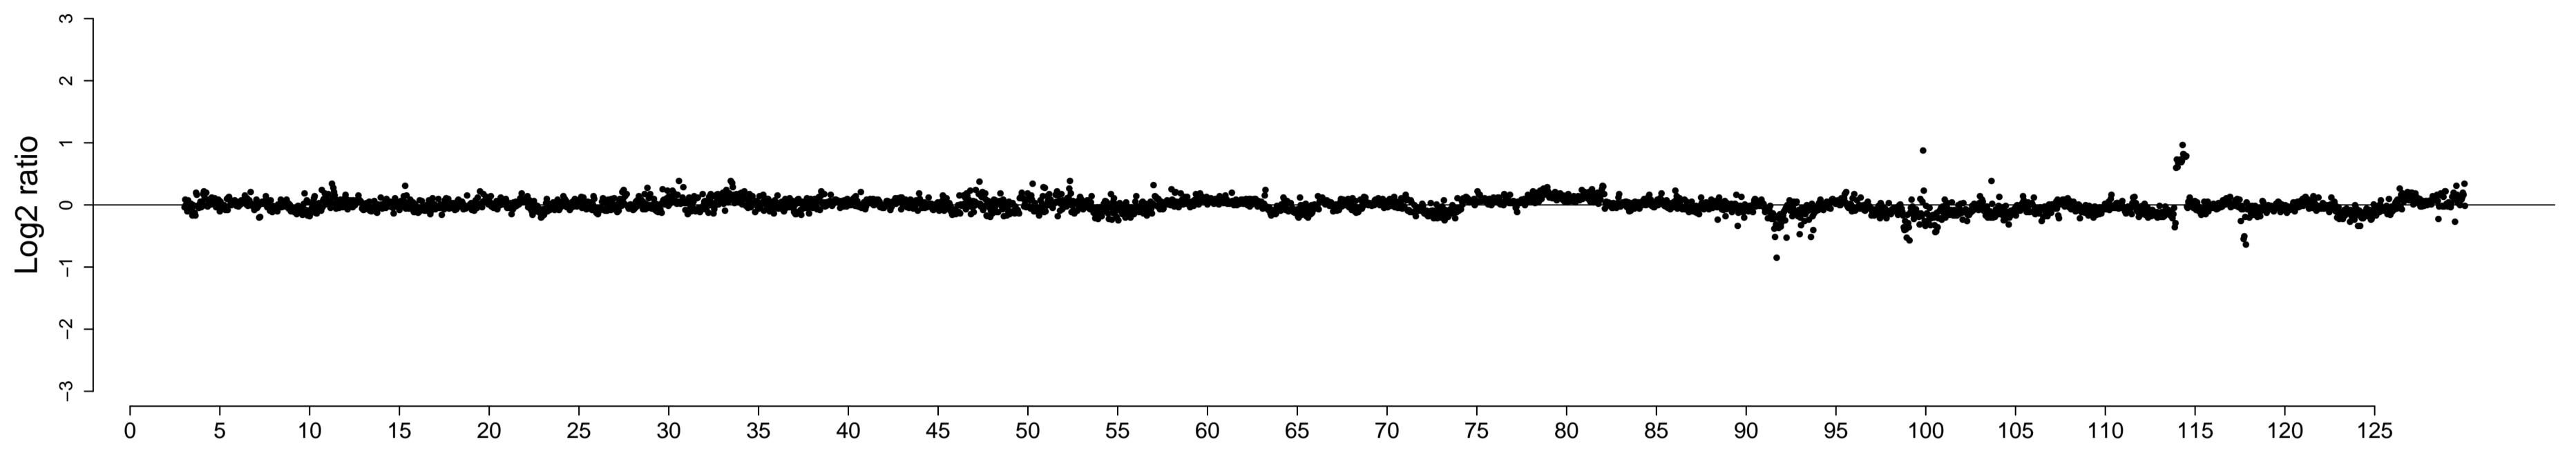

chr10:HAP2 p18

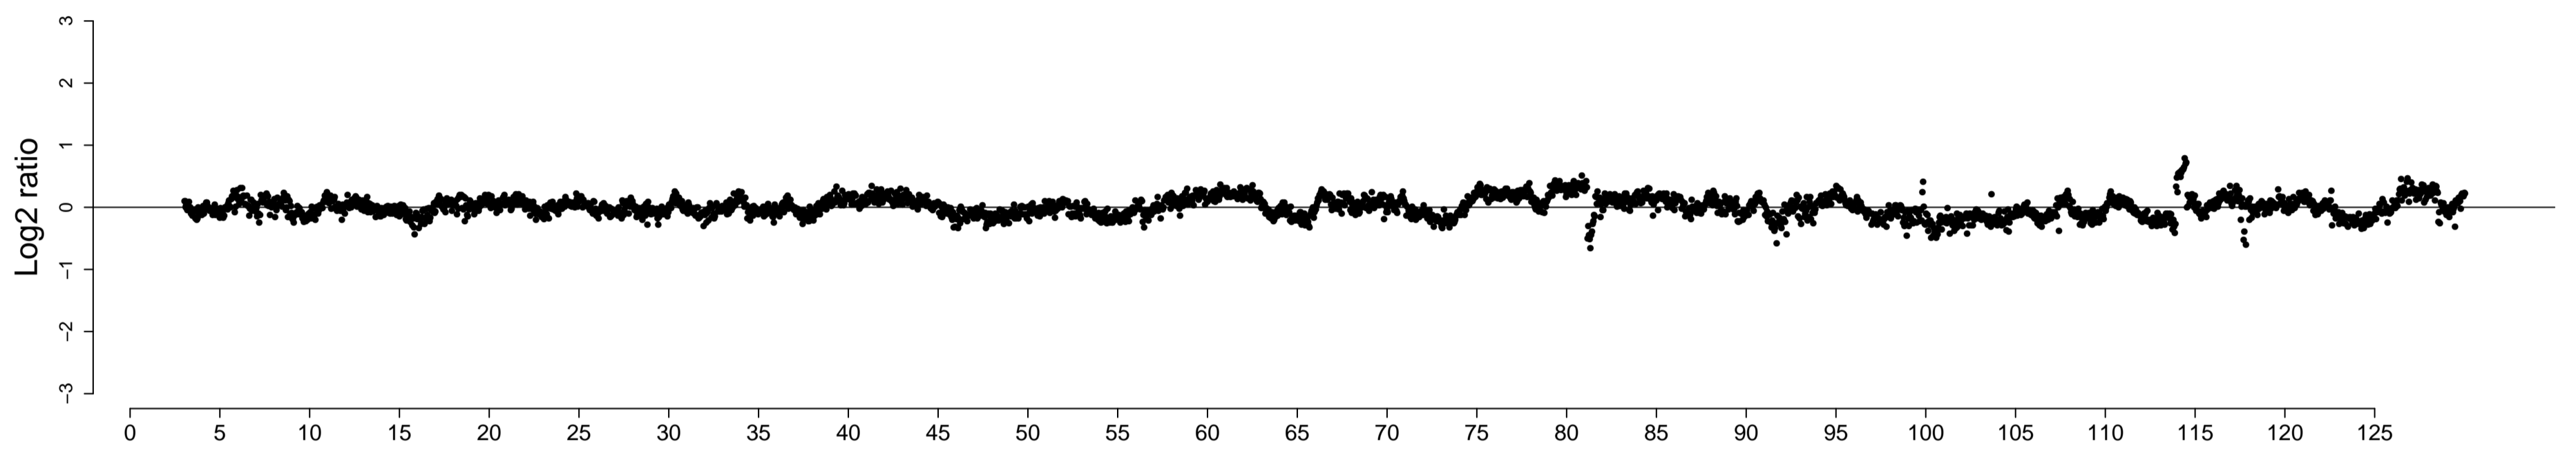

chr10:HTG\_control male kidney

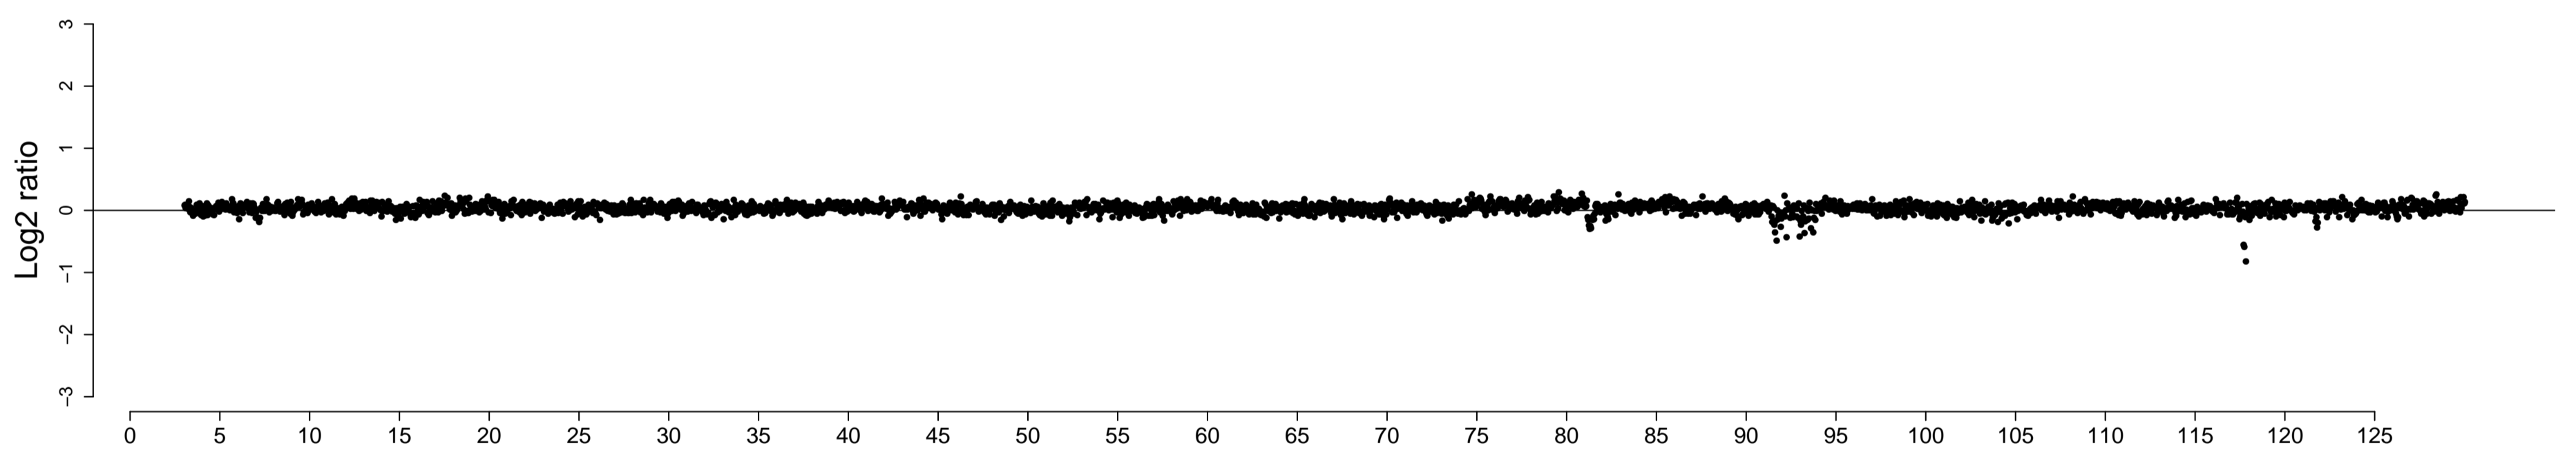

chr10:HTG1 p11

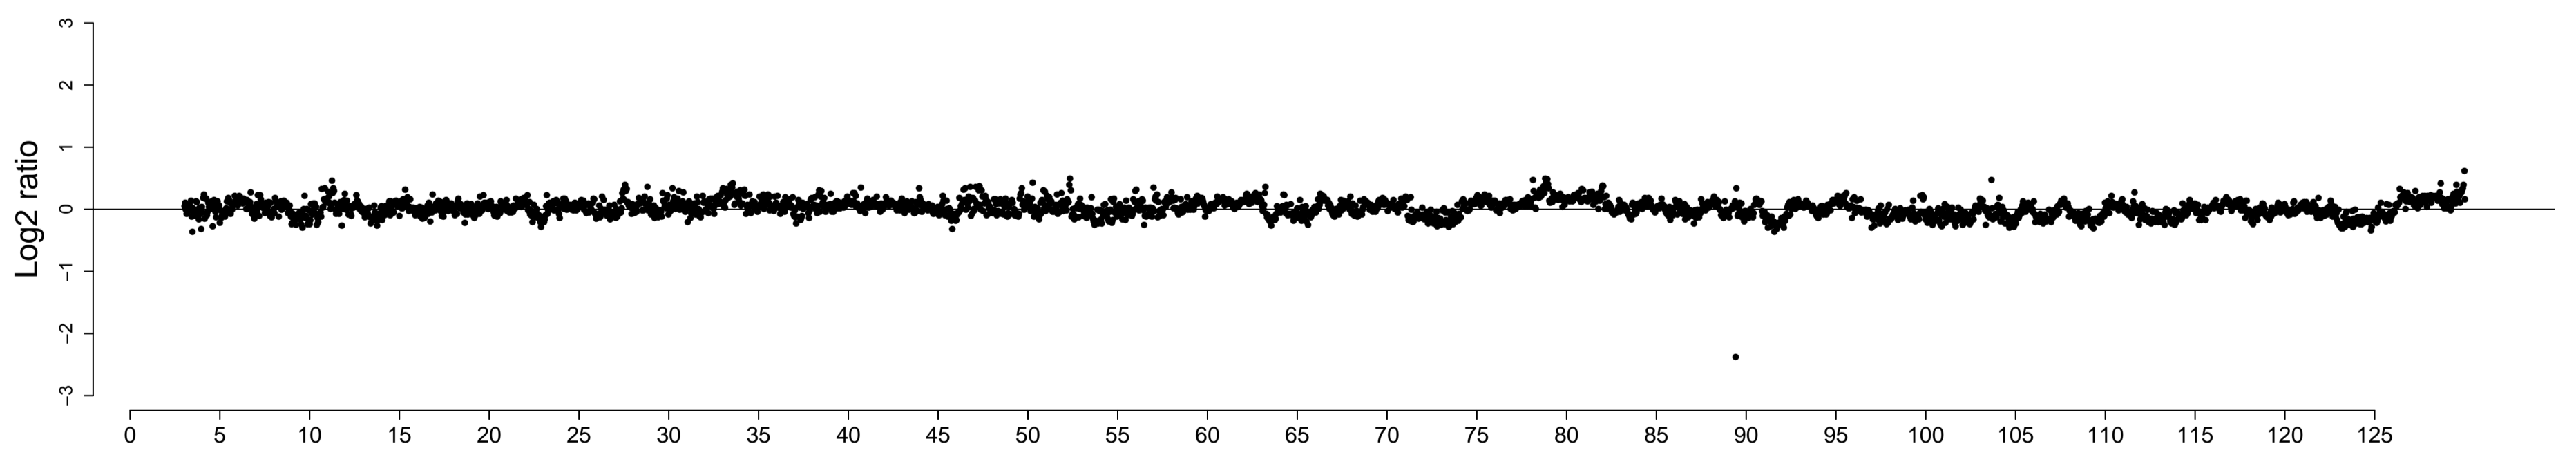

chr10:HTG2 p11

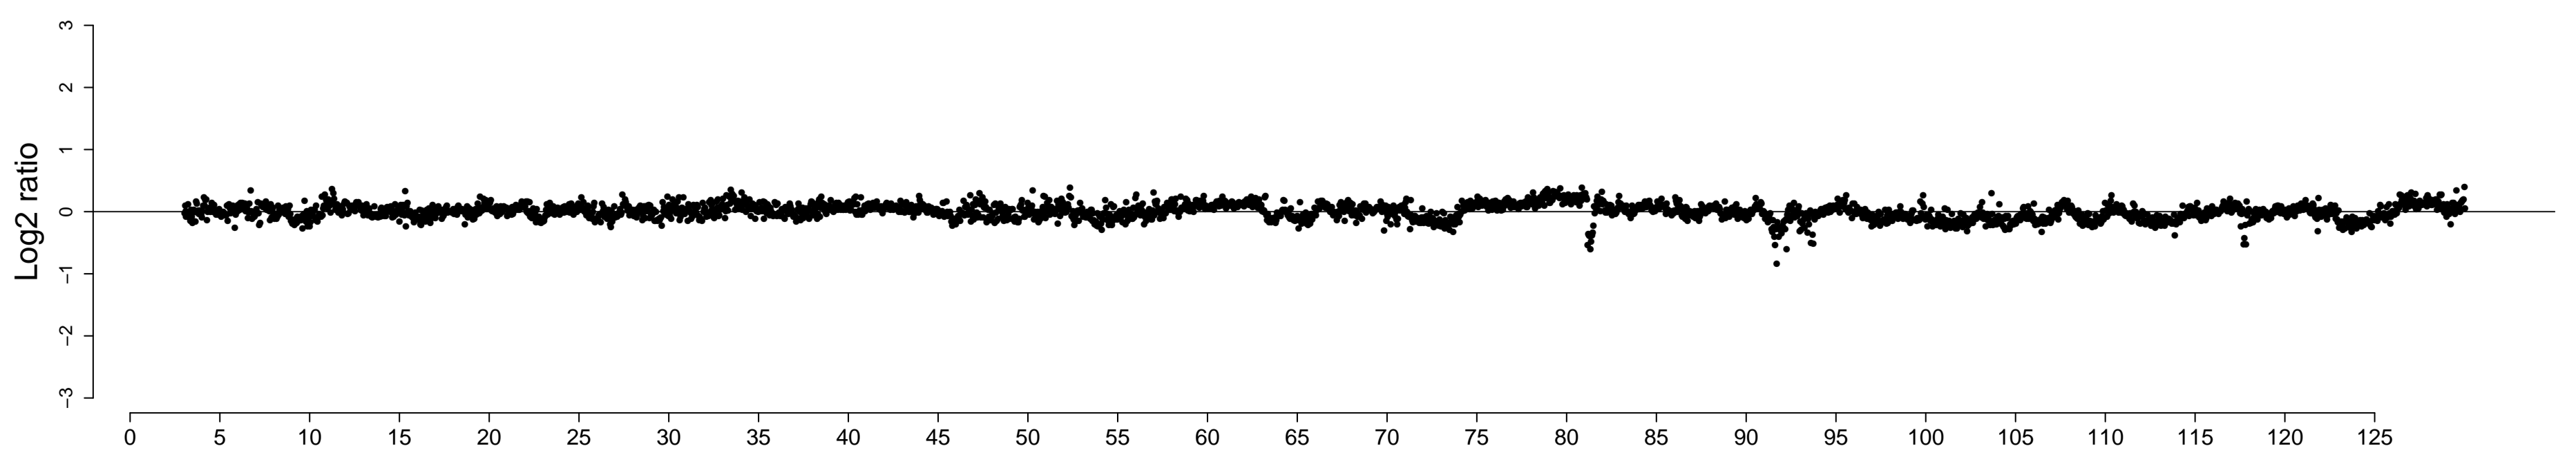

chr11:CBA control kidney

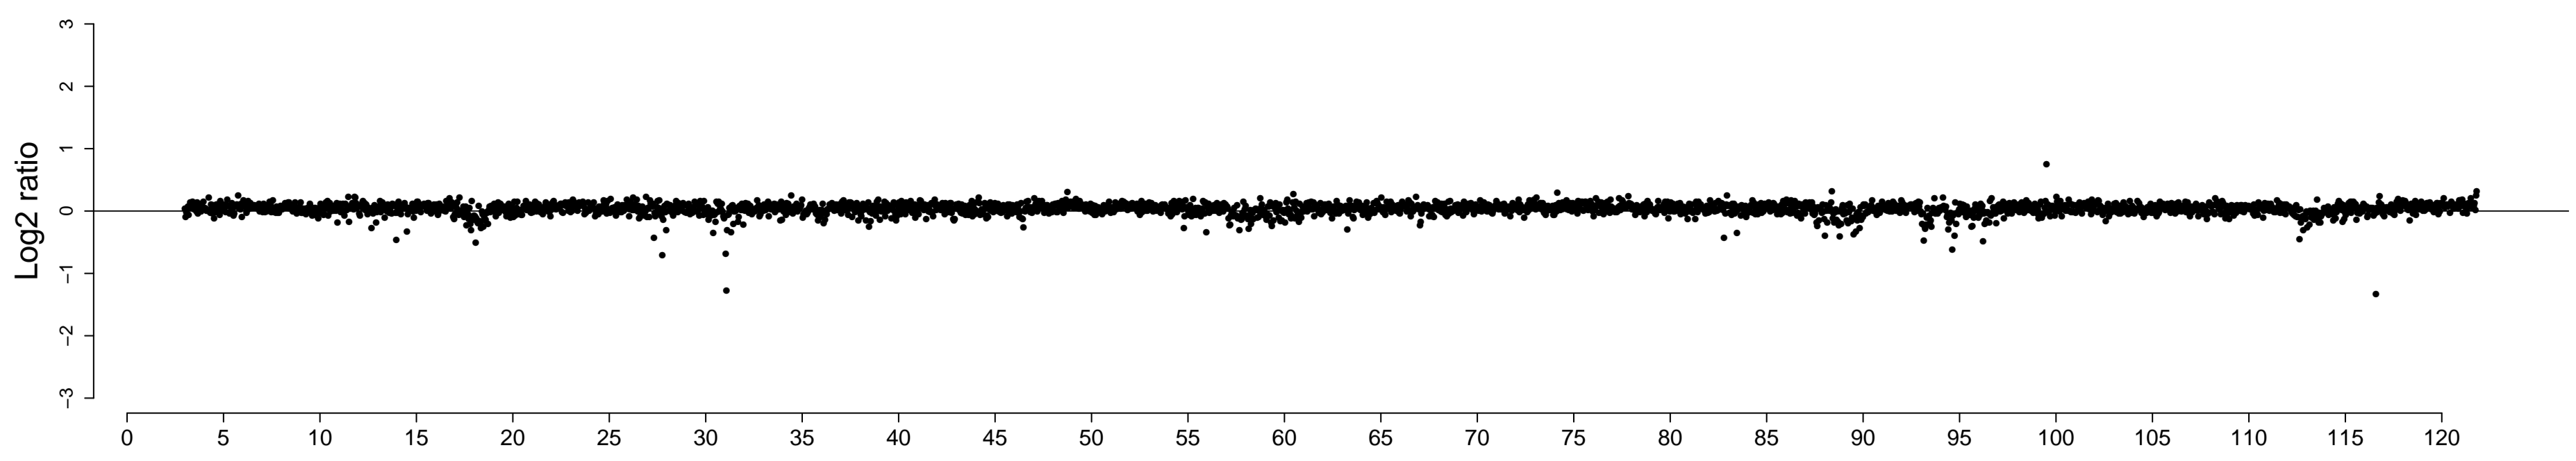

chr11:HAP1 p25

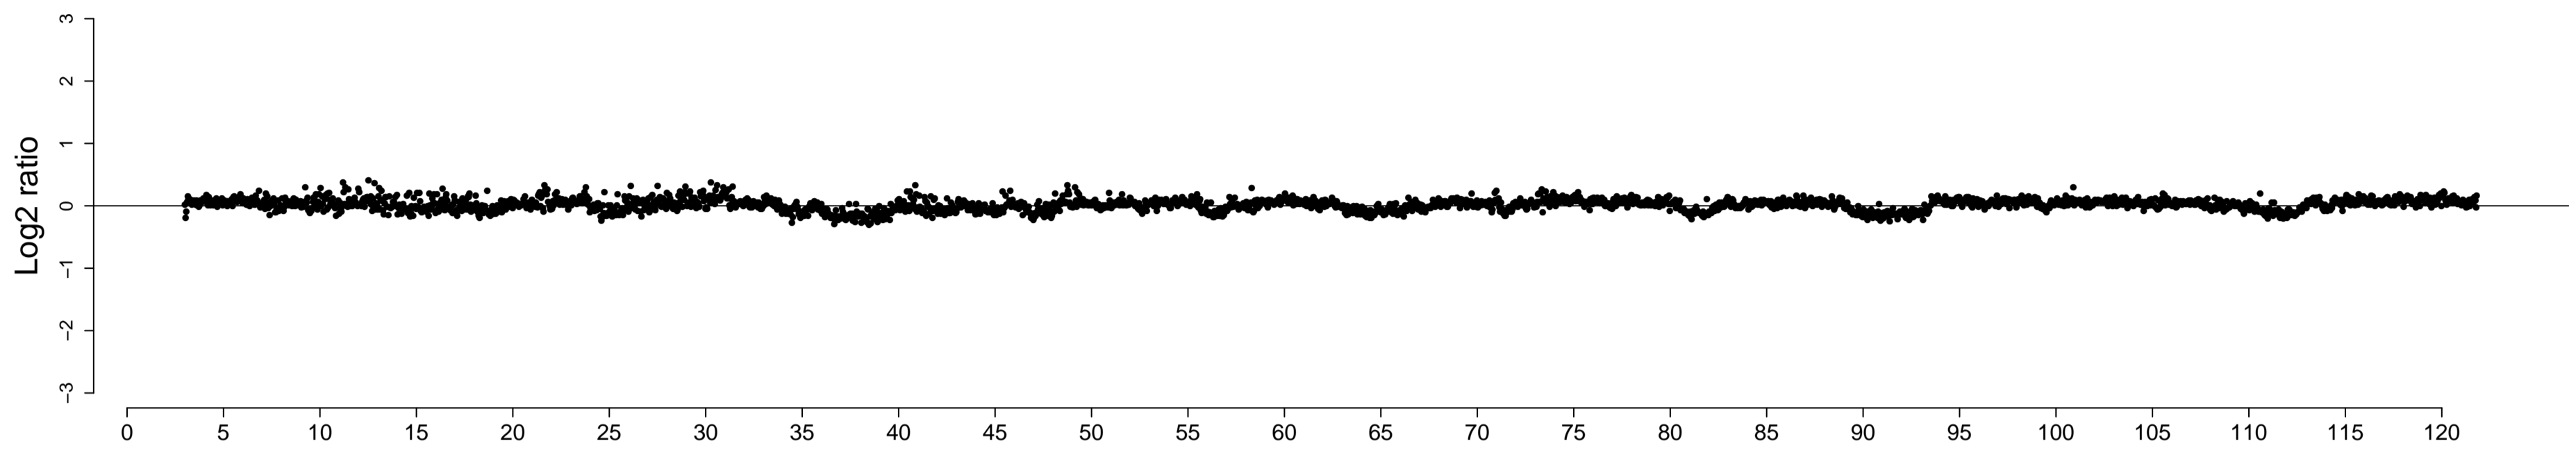

chr11:HAP2 p18

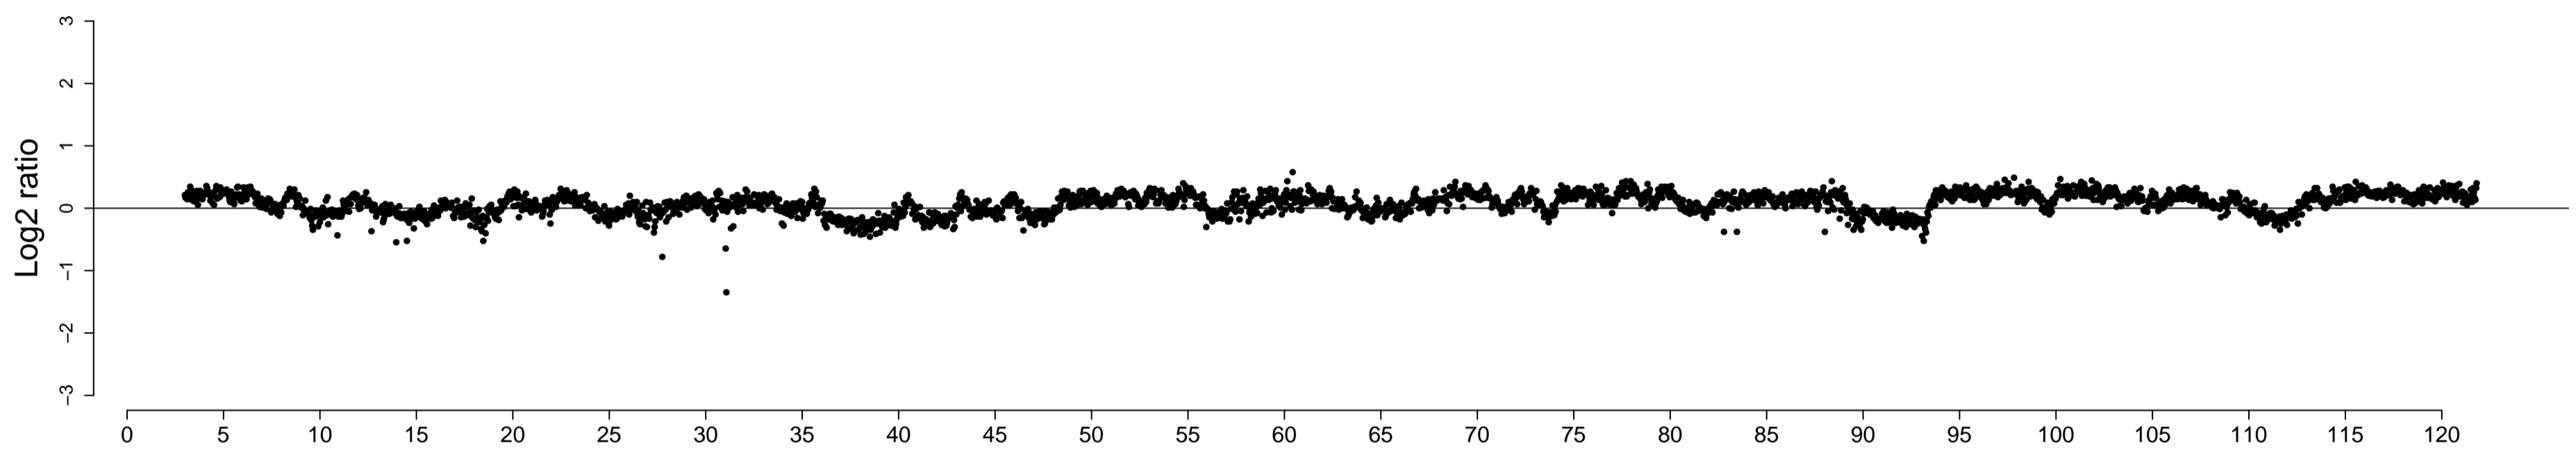

chr11:HTG\_control male kidney

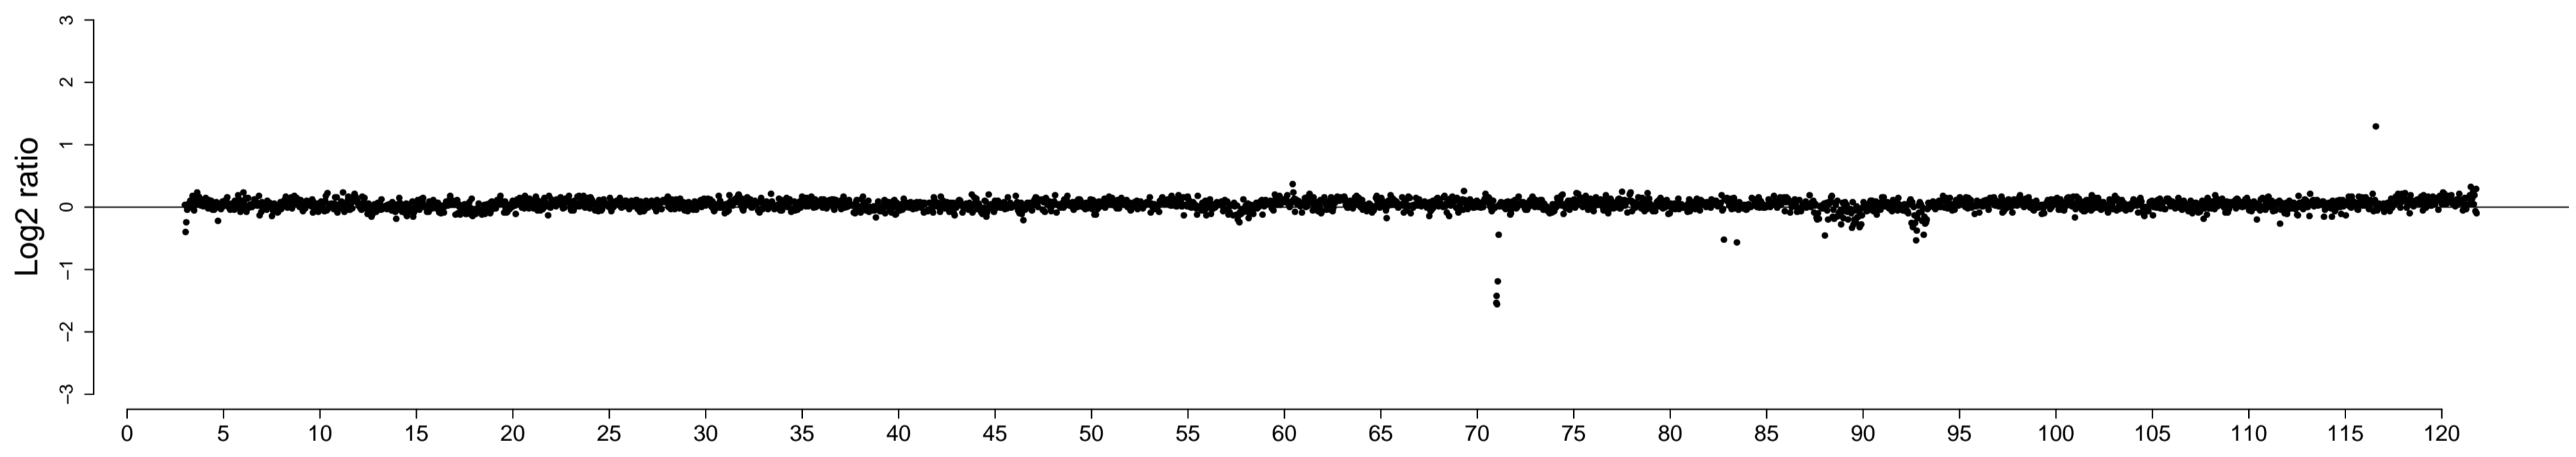

chr11:HTG1 p11

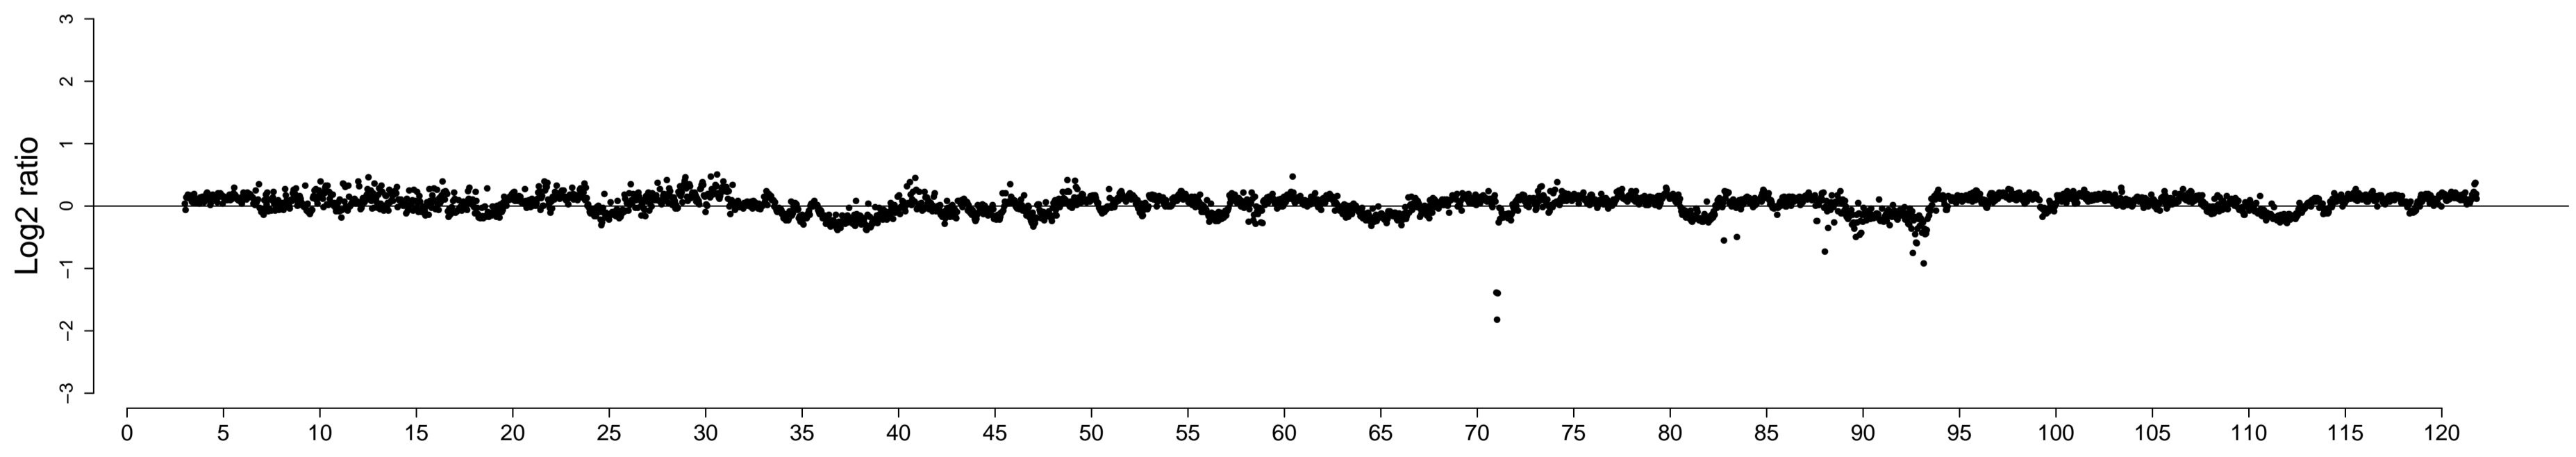

chr11:HTG2 p11

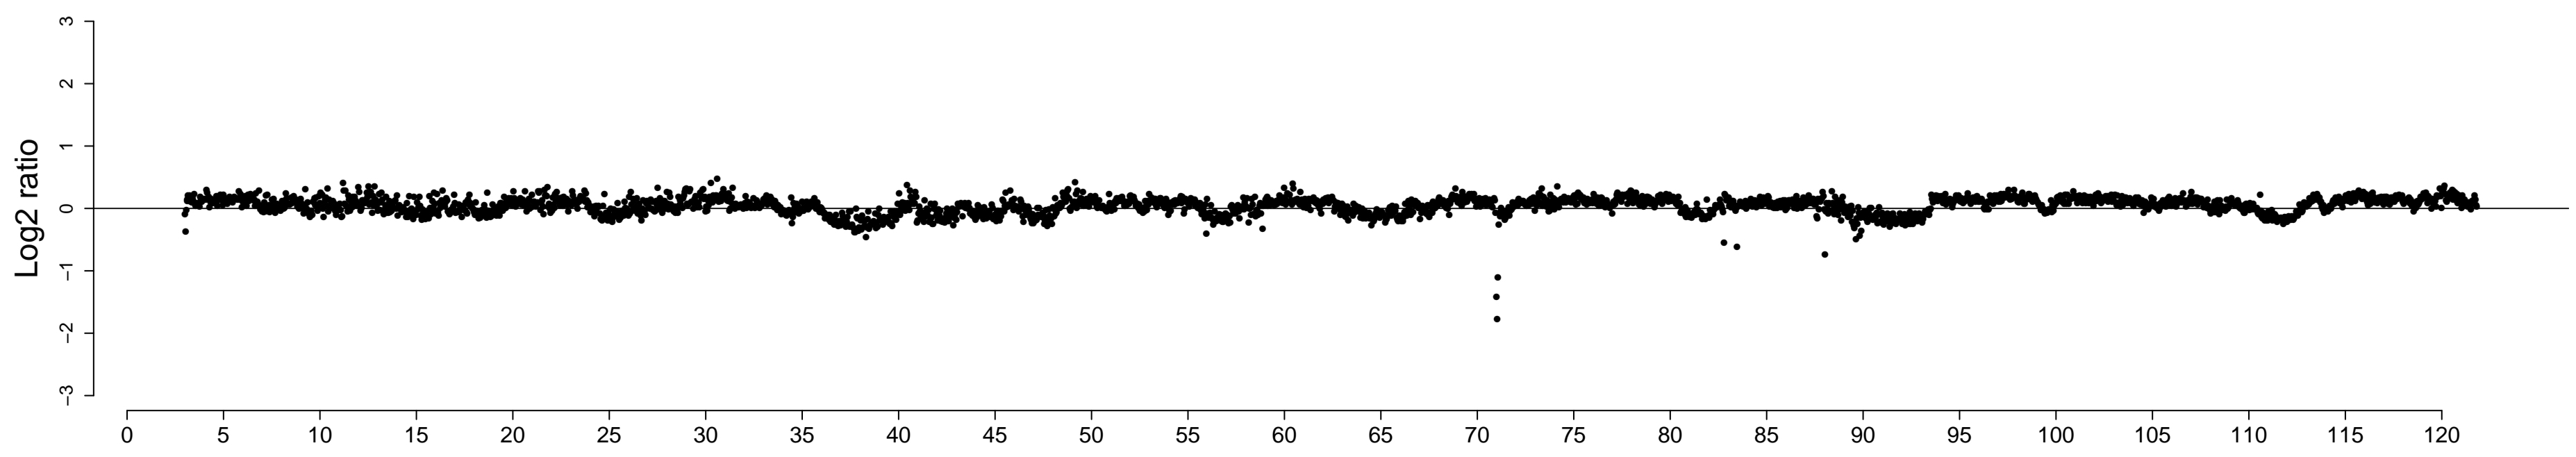

chr12:CBA control kidney

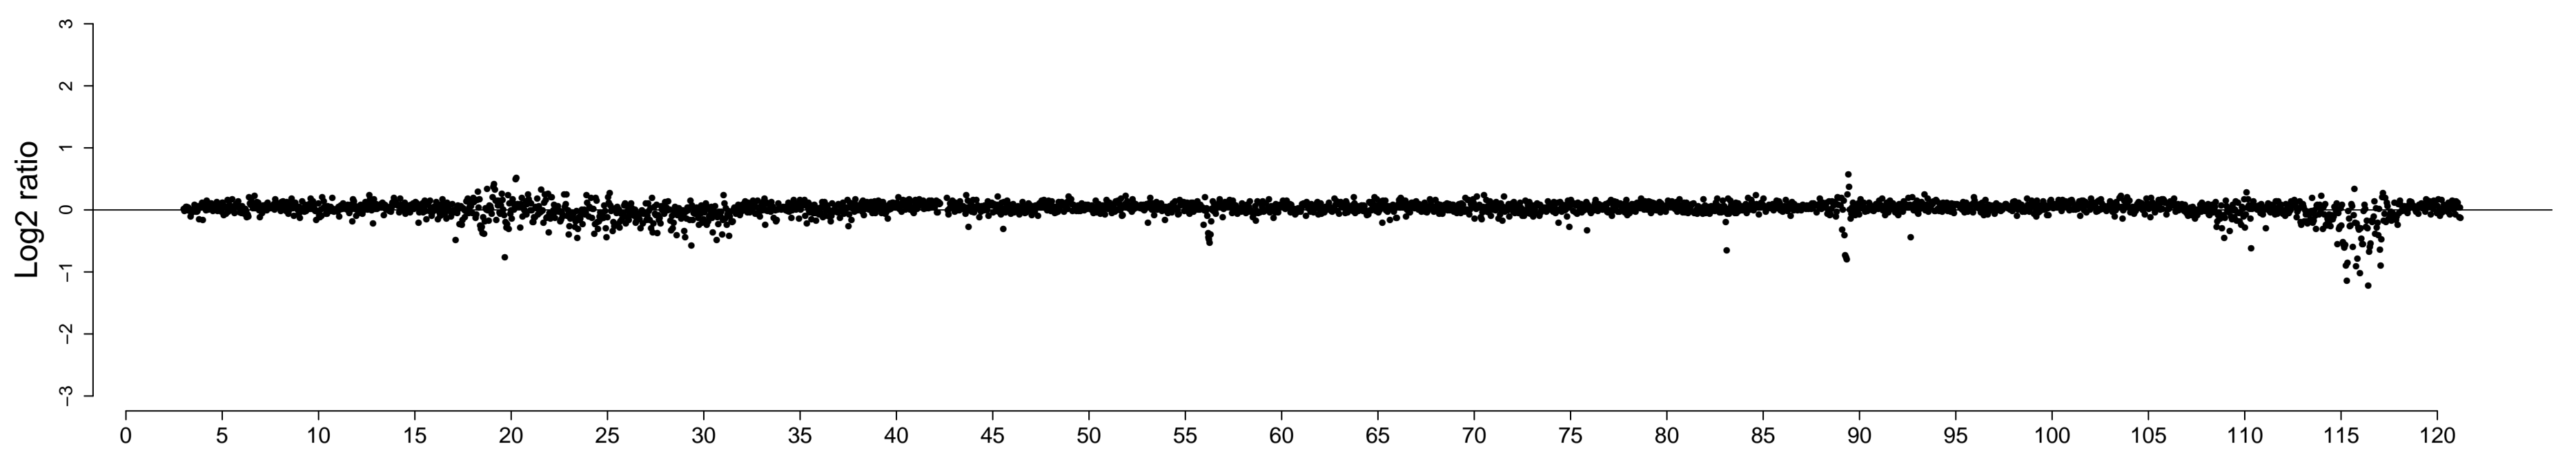

chr12:HAP1 p25

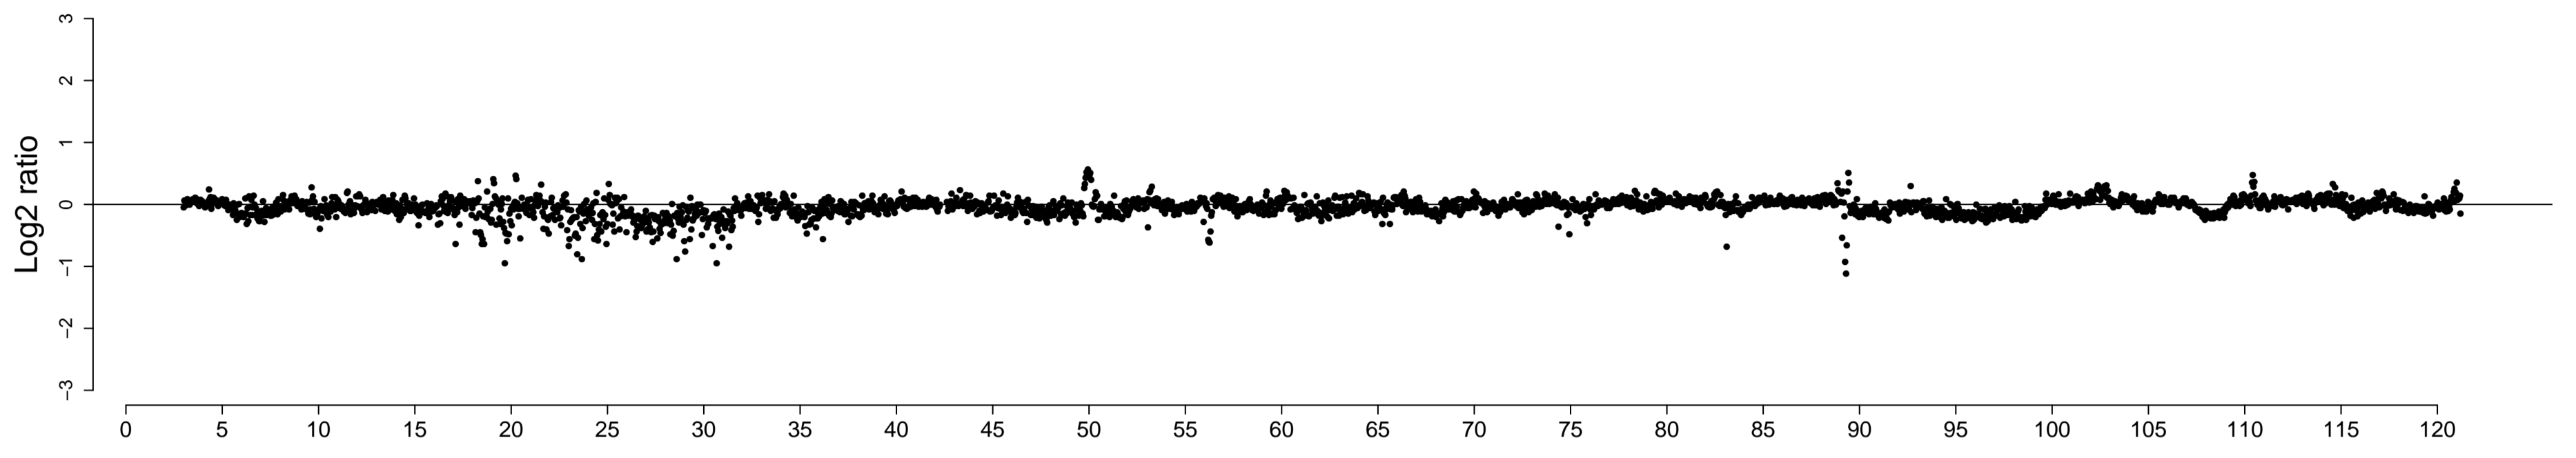

chr12:HAP2 p18

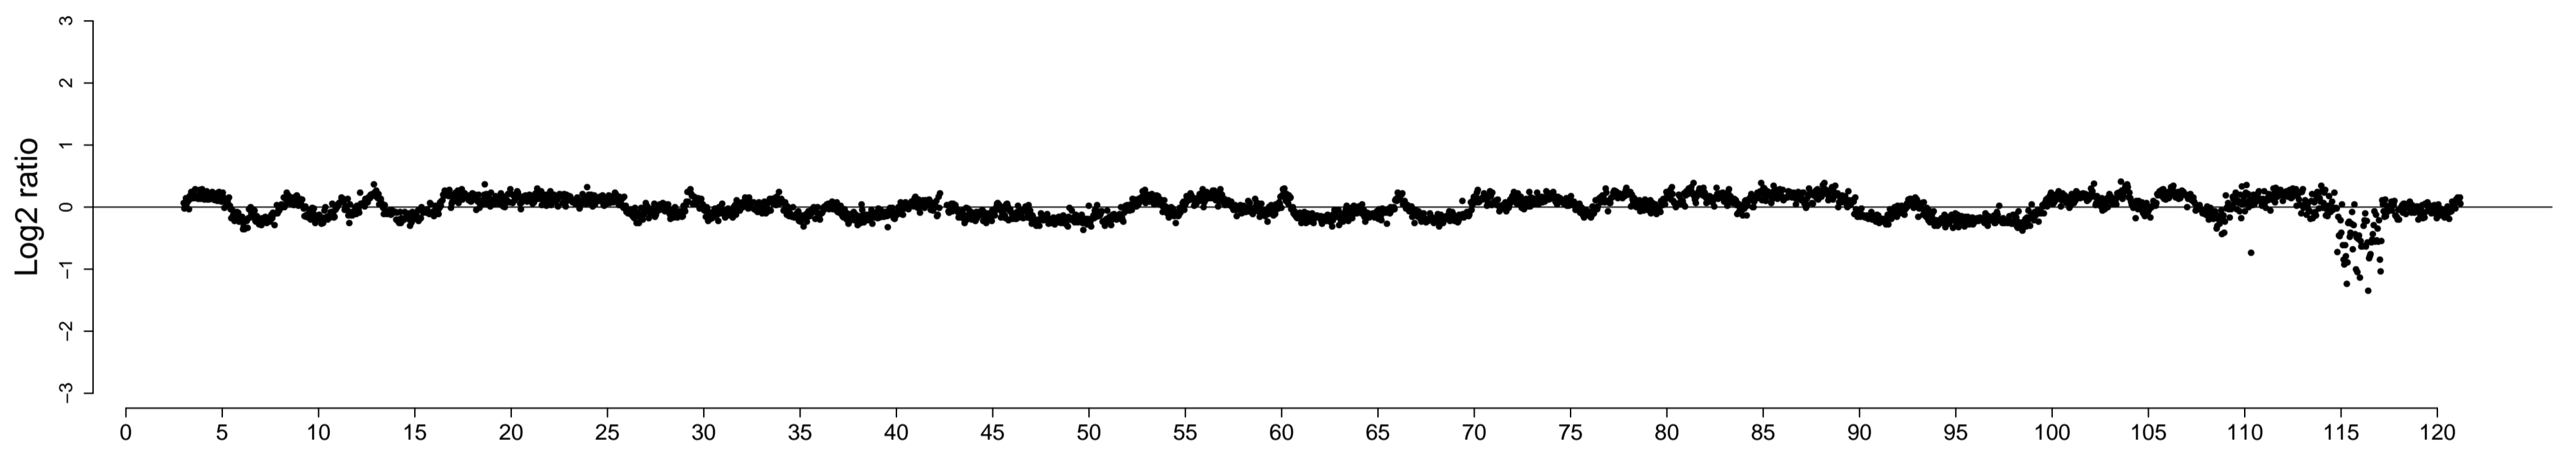

chr12:HTG\_control male kidney

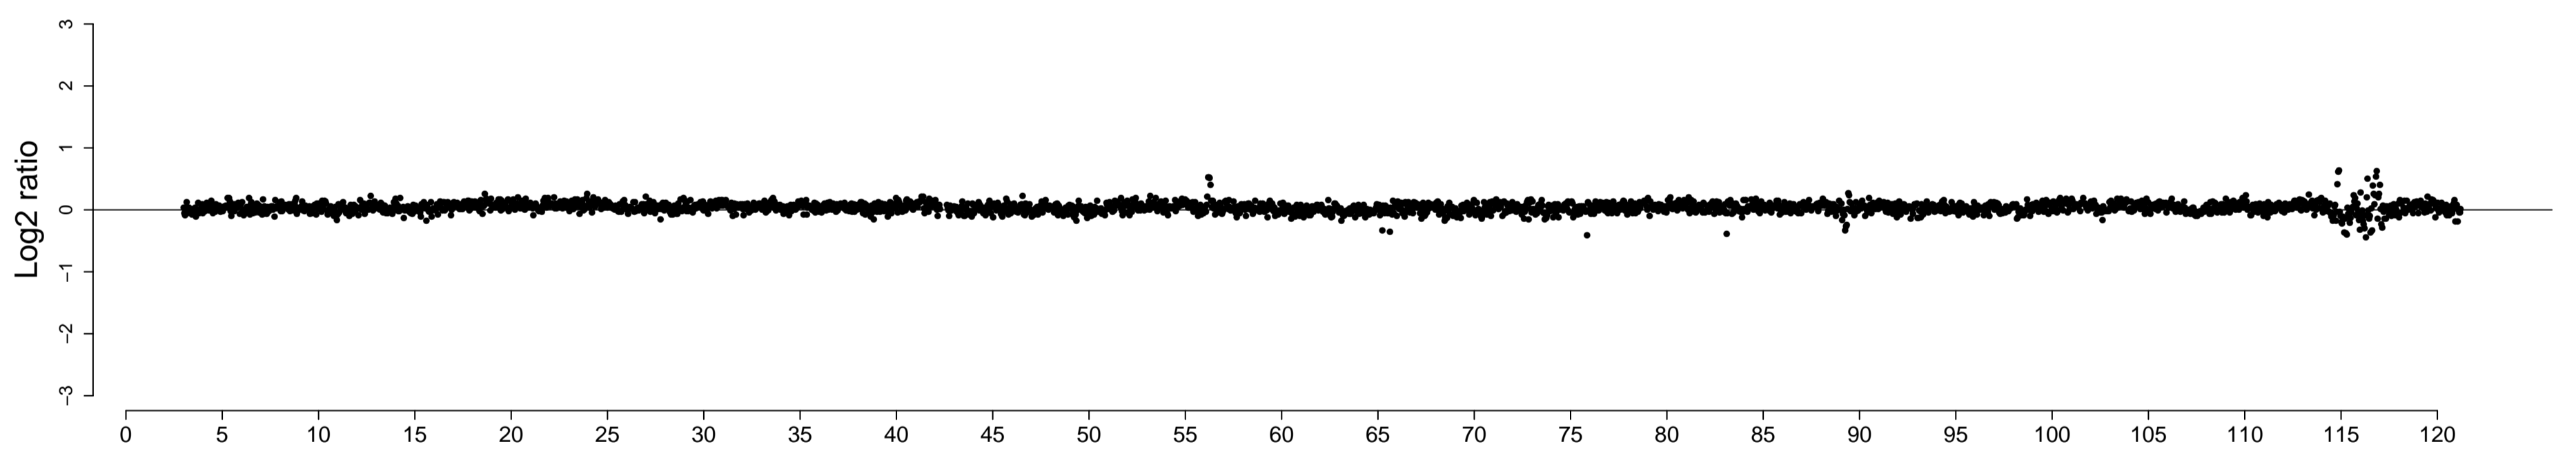

chr12:HTG1 p11

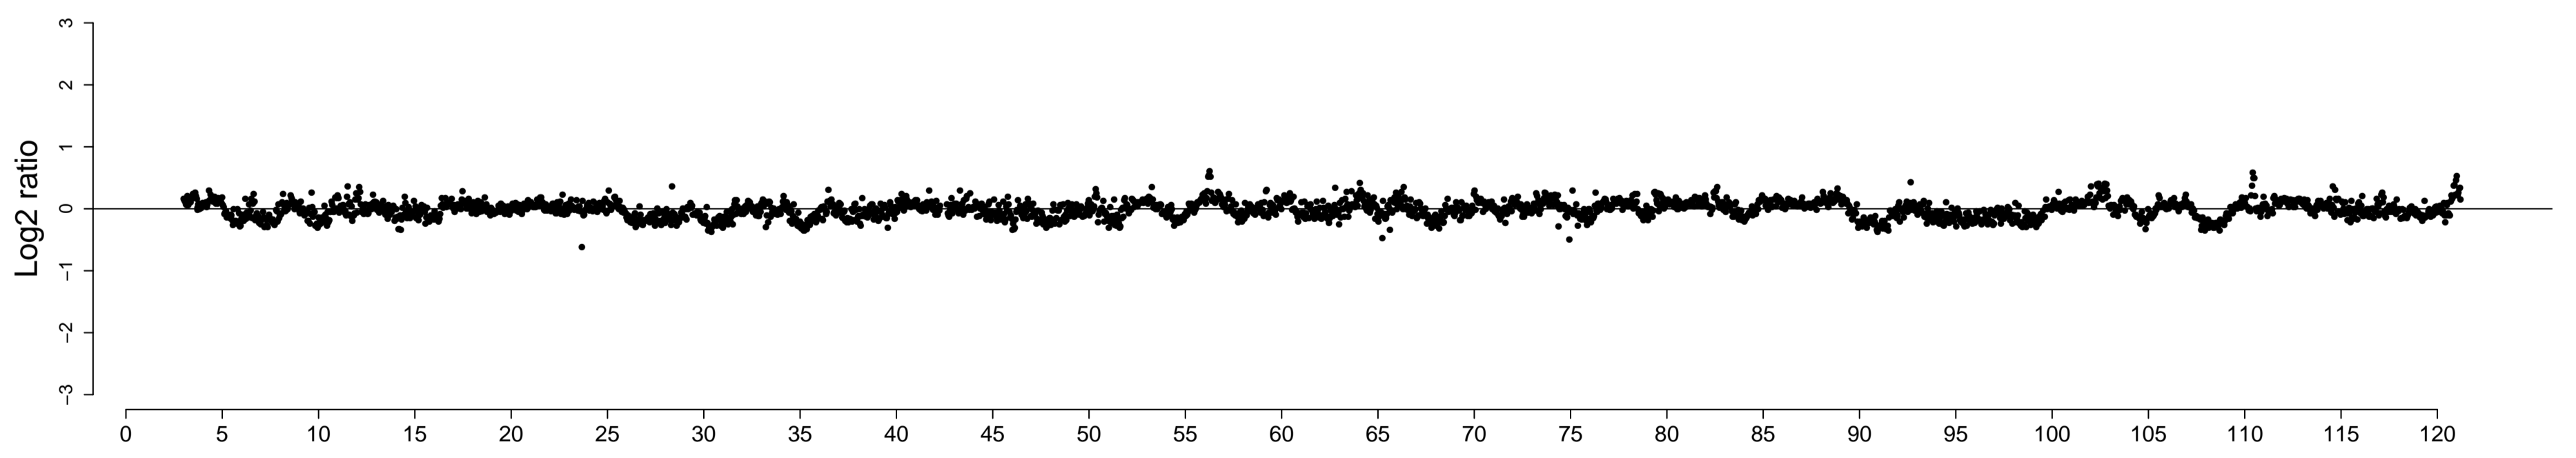

chr12:HTG2 p11

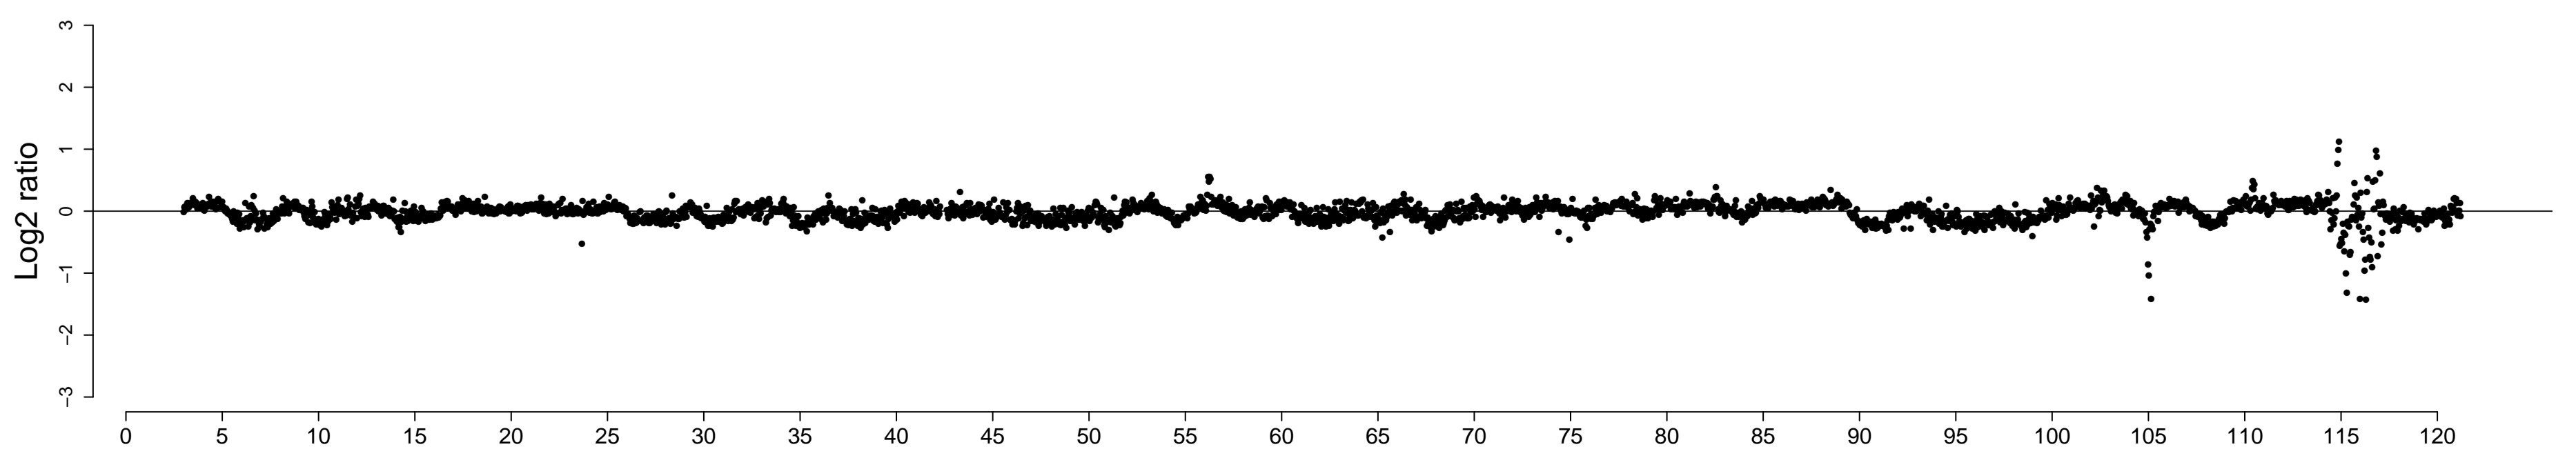



chr13:CBA control kidney

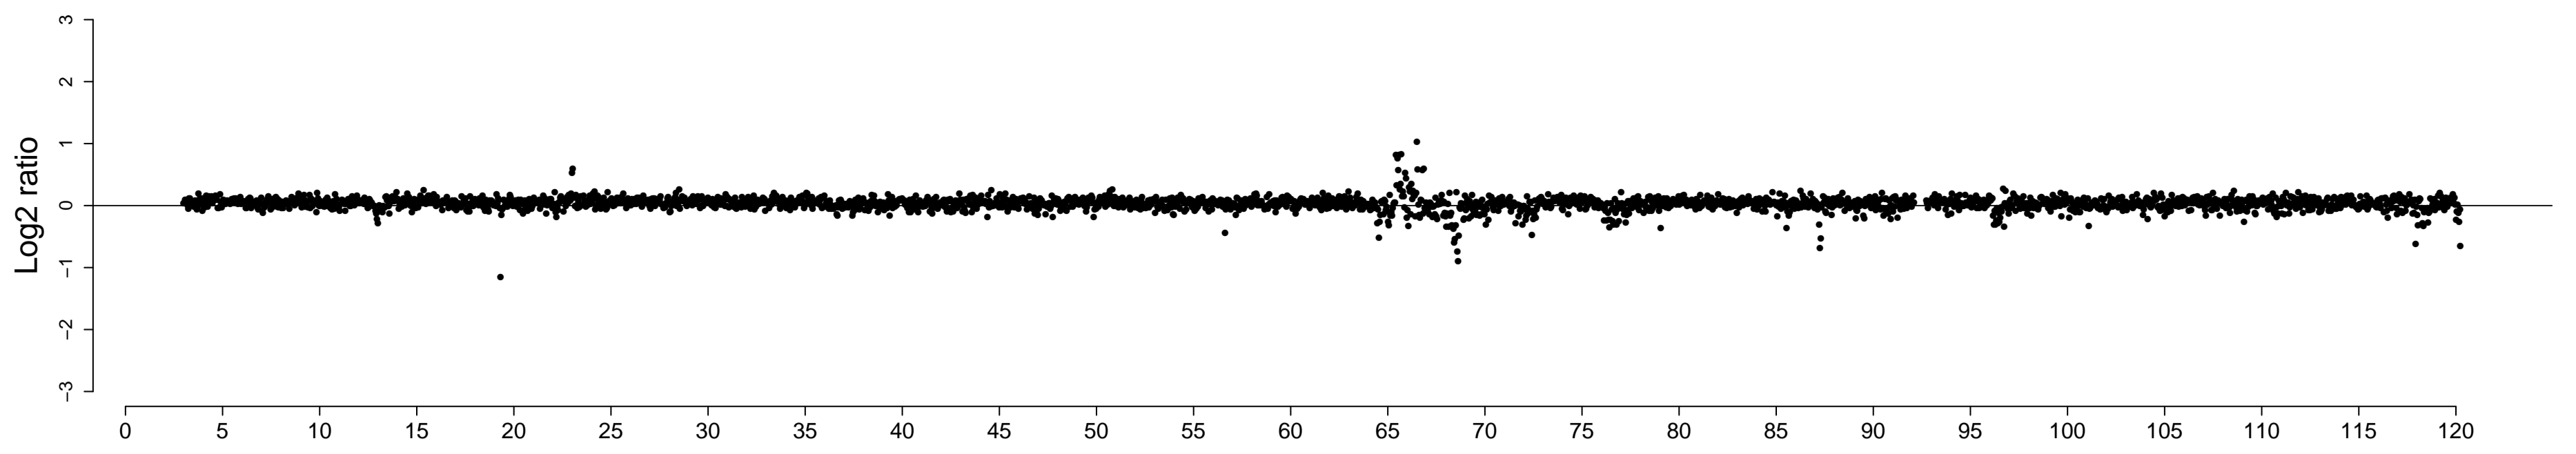

chr13:HAP1 p25

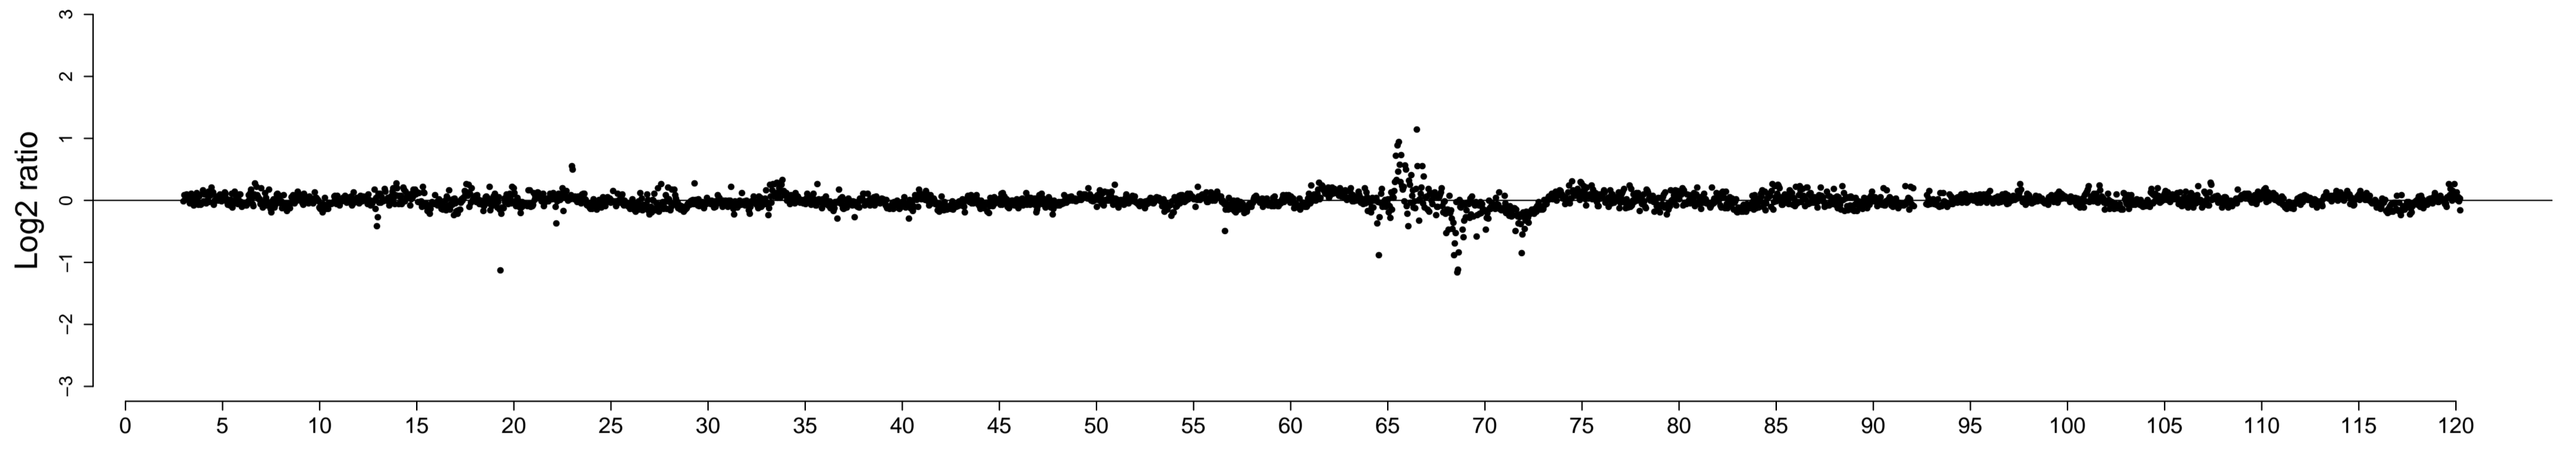

chr13:HAP2 p18

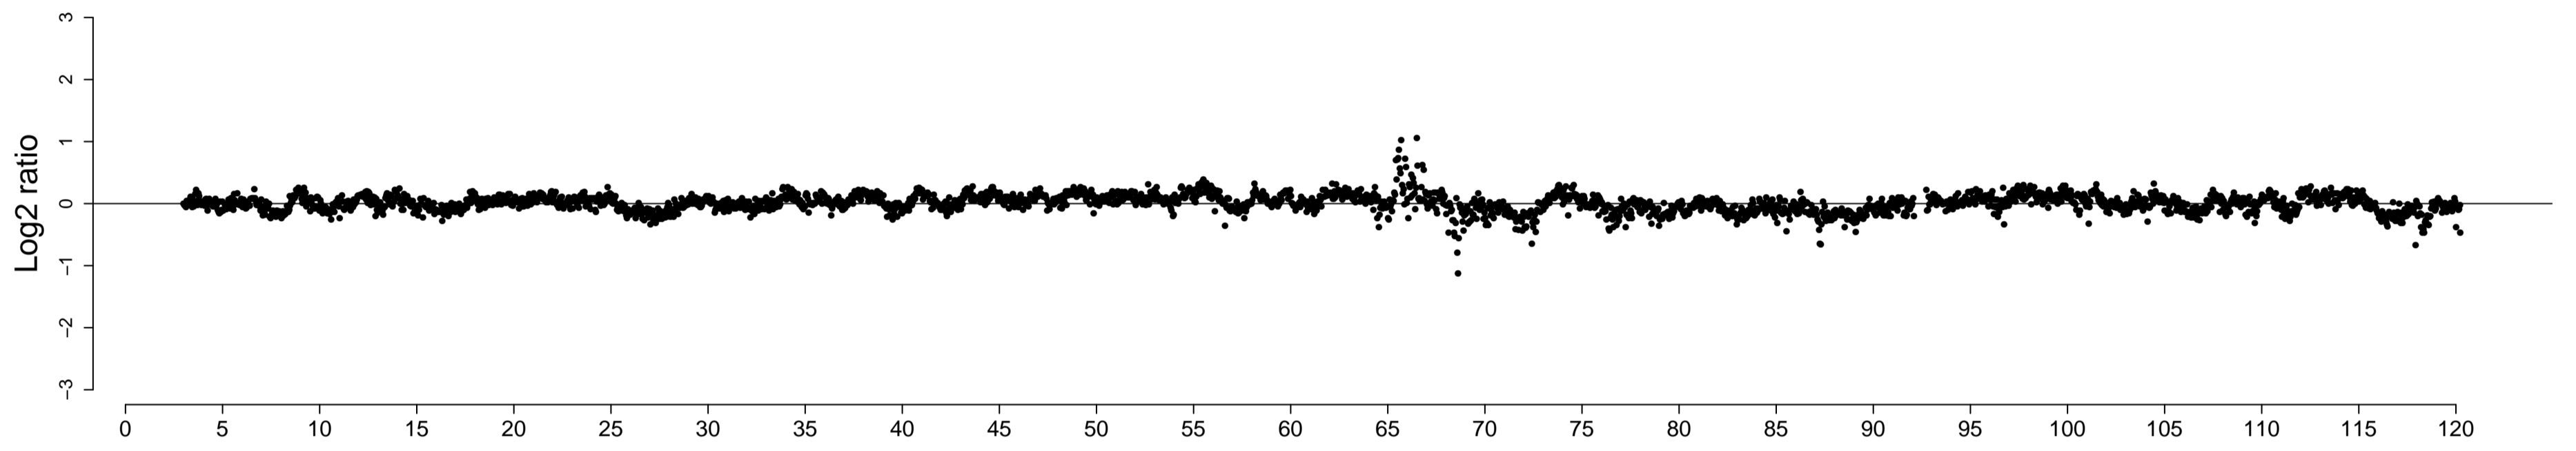

chr13:HTG\_control male kidney

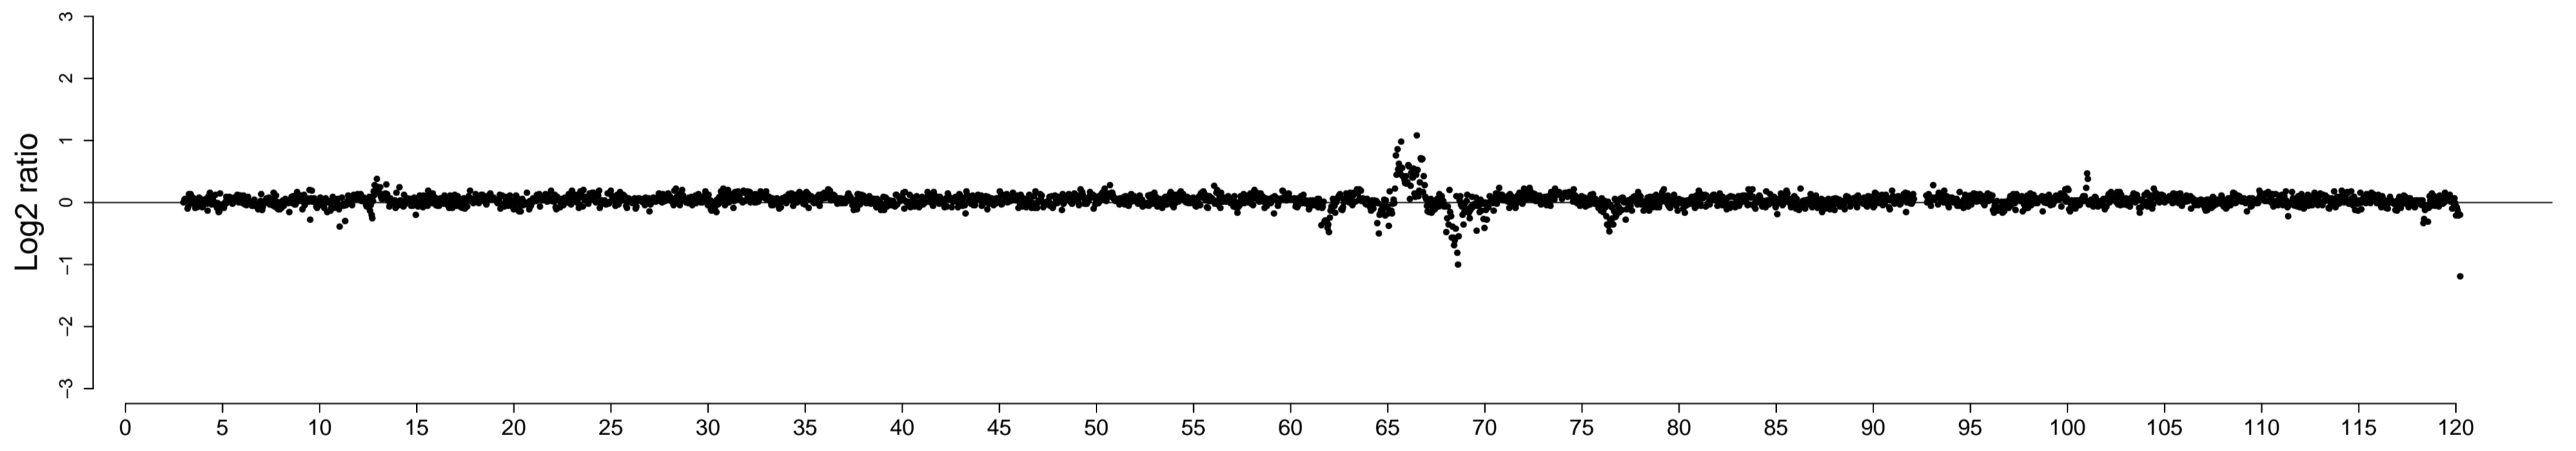

chr13:HTG1 p11

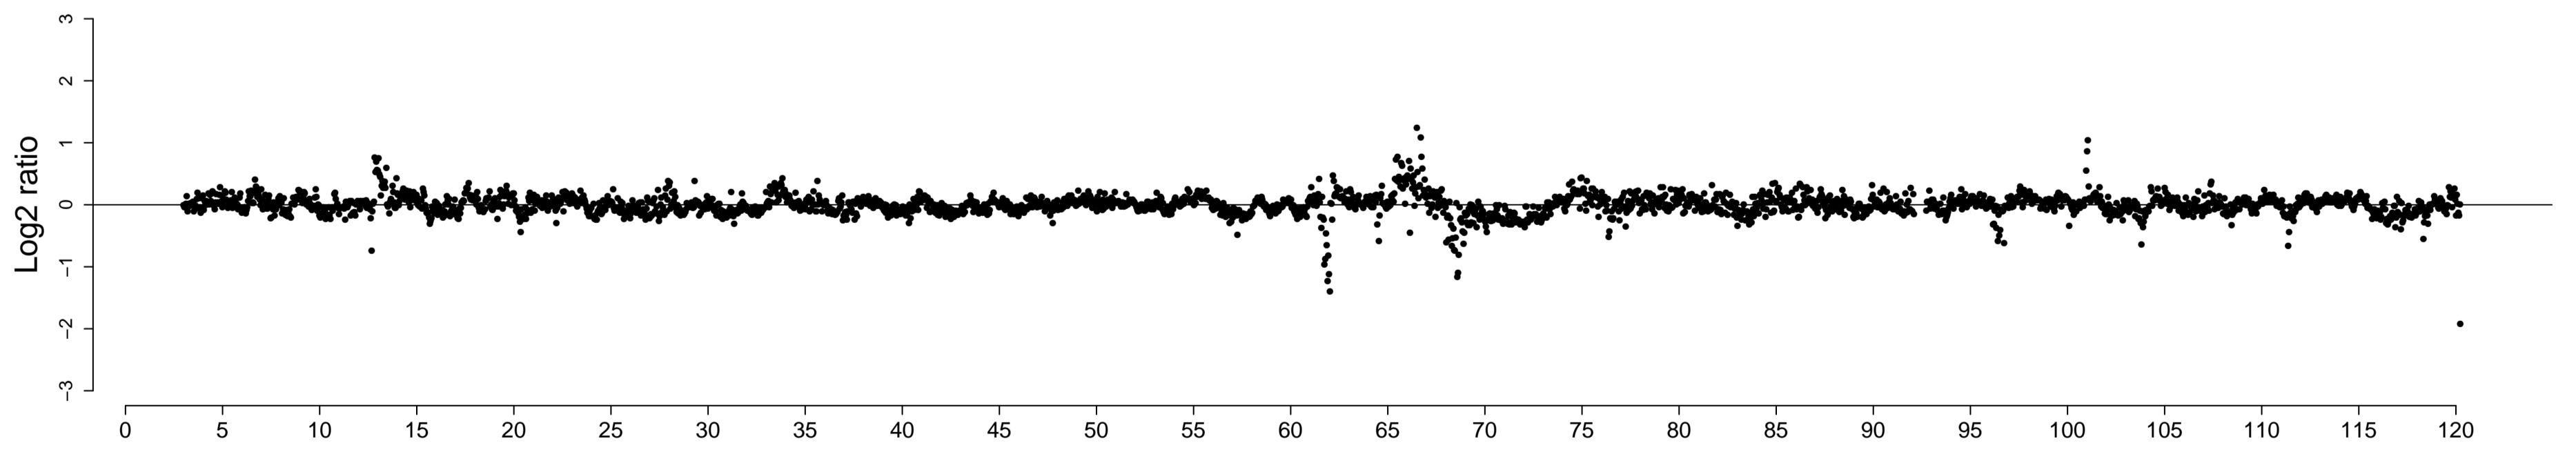

chr13:HTG2 p11

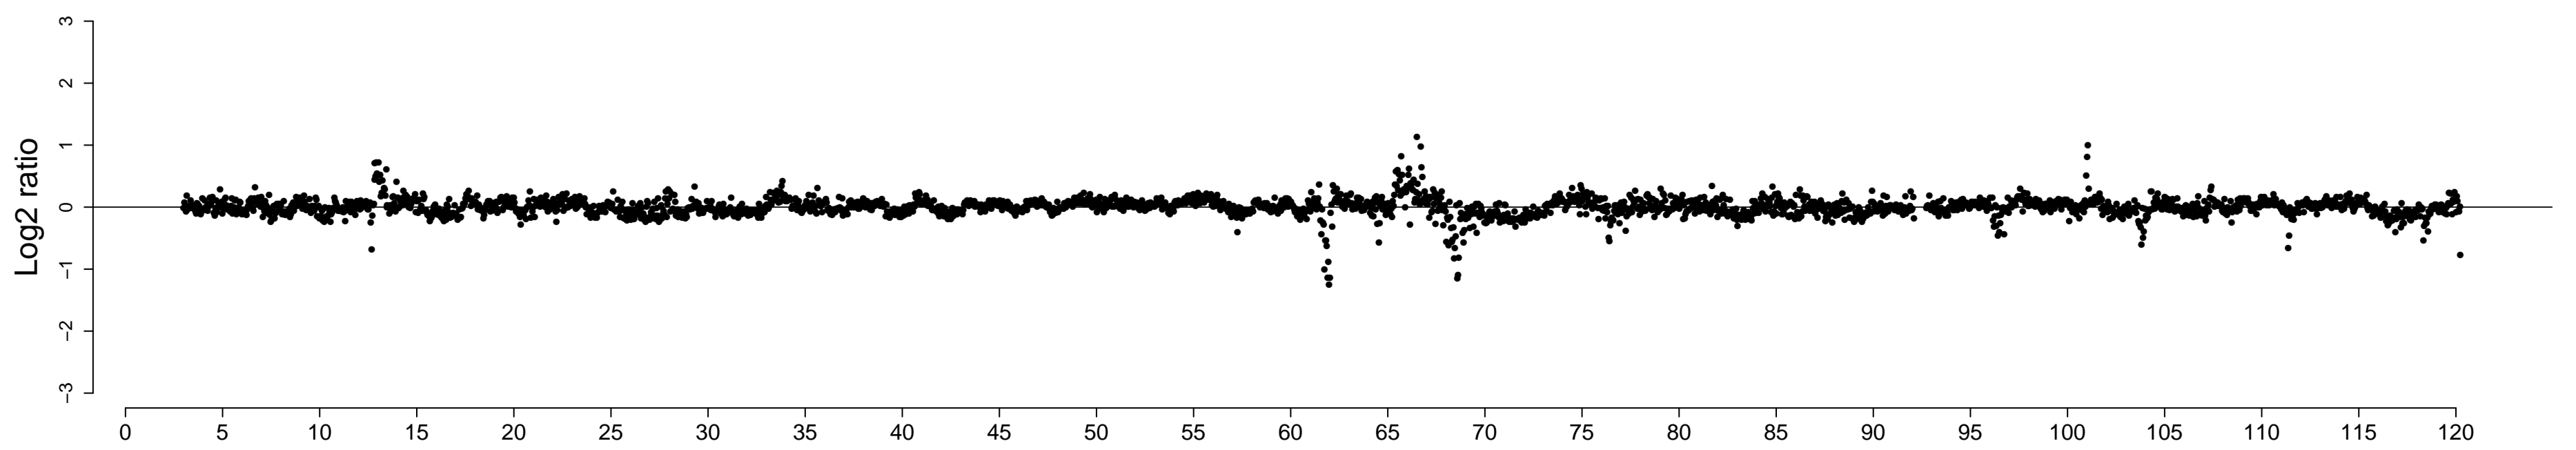

chr14:CBA control kidney

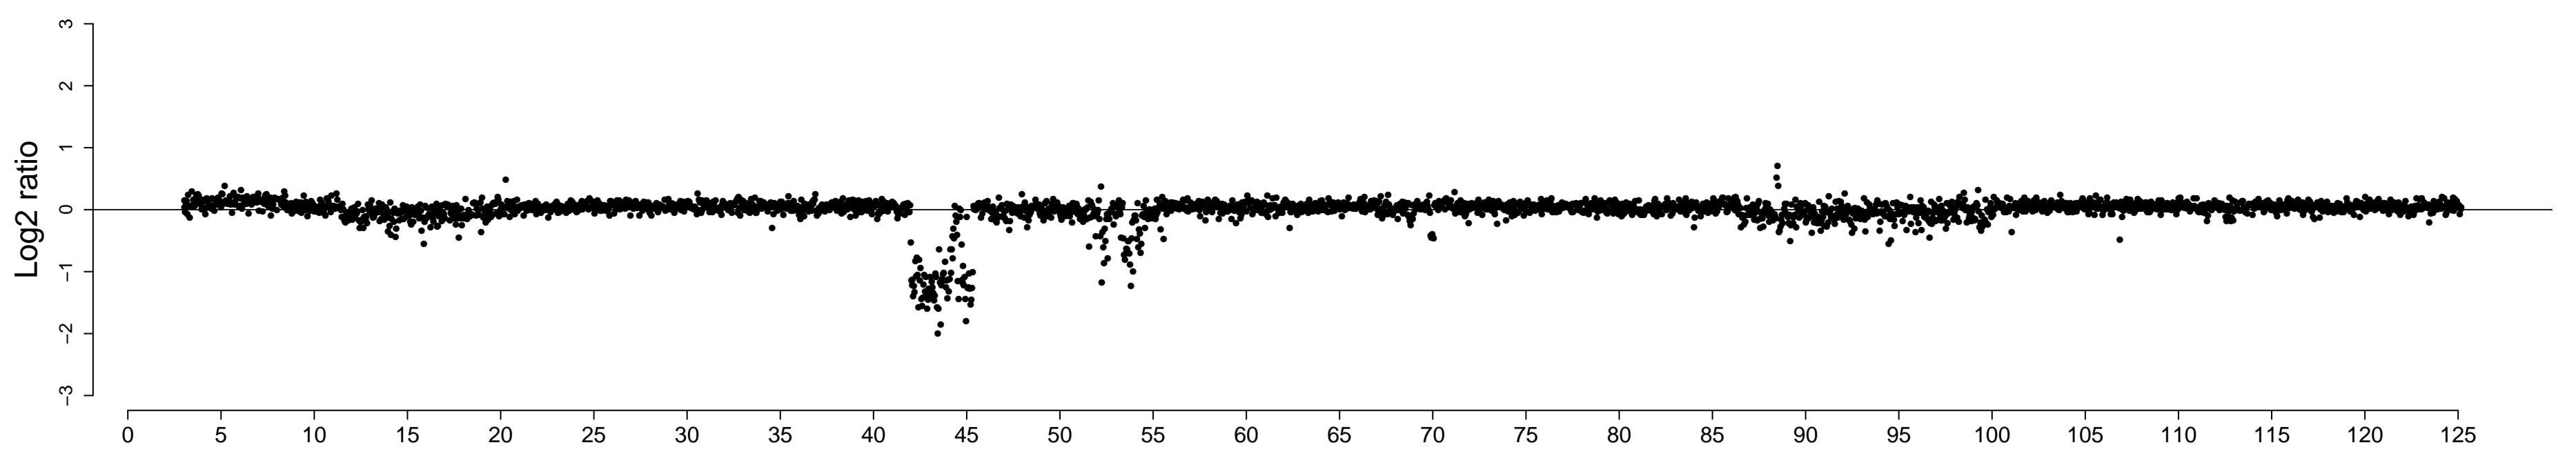

chr14:HAP1 p25

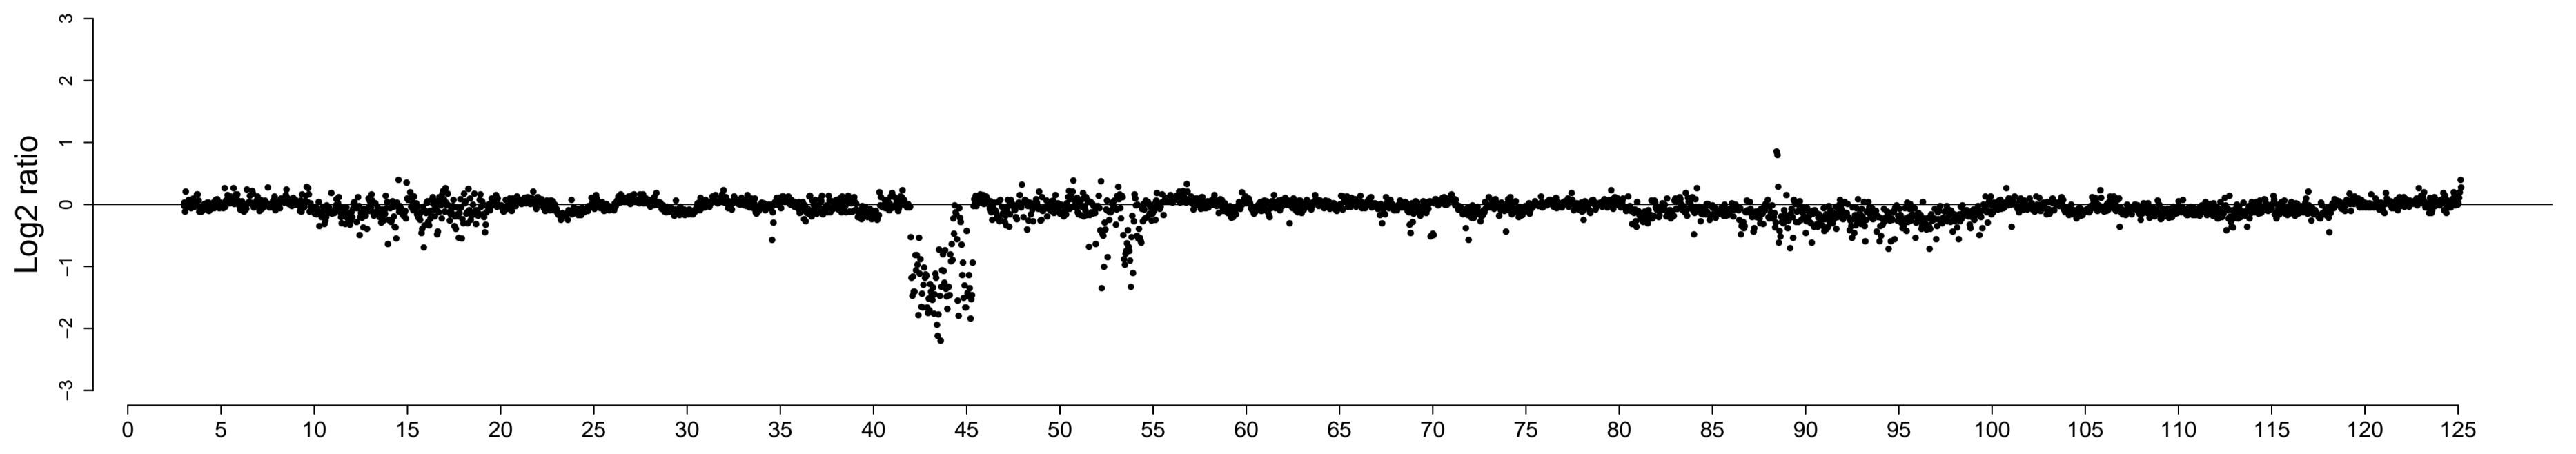

chr14:HAP2 p18

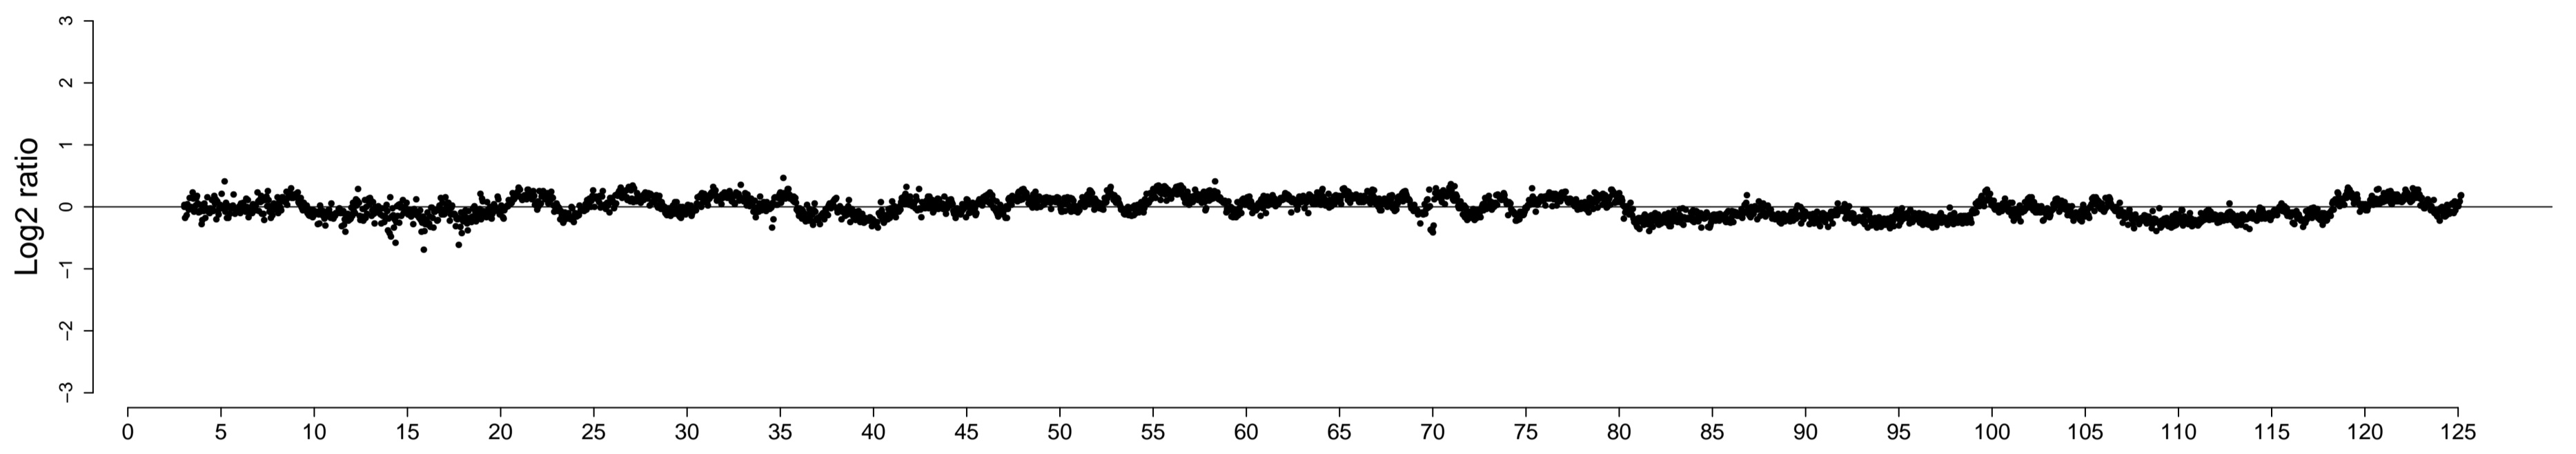

chr14:HTG\_control male kidney

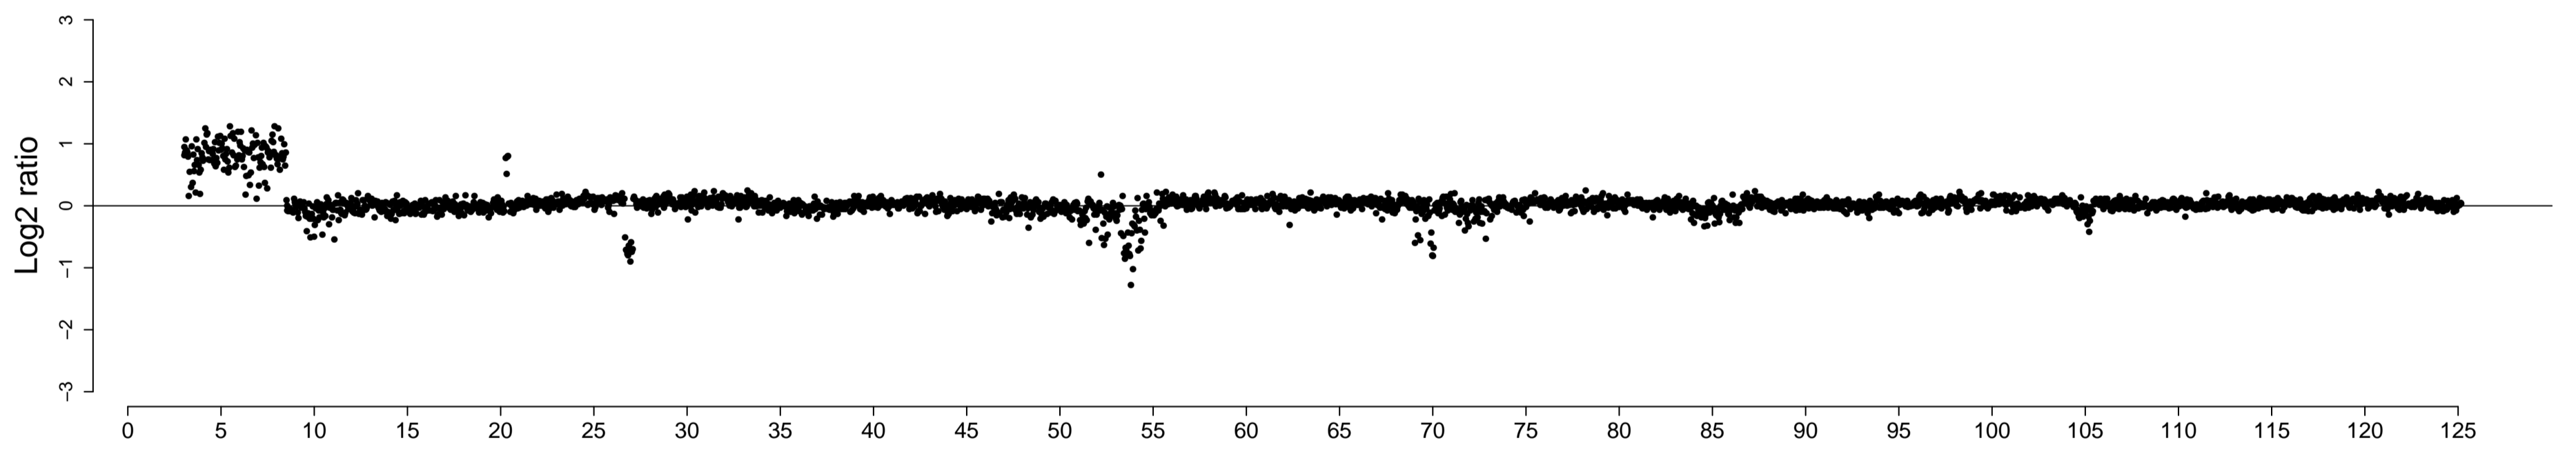

chr14:HTG1 p11

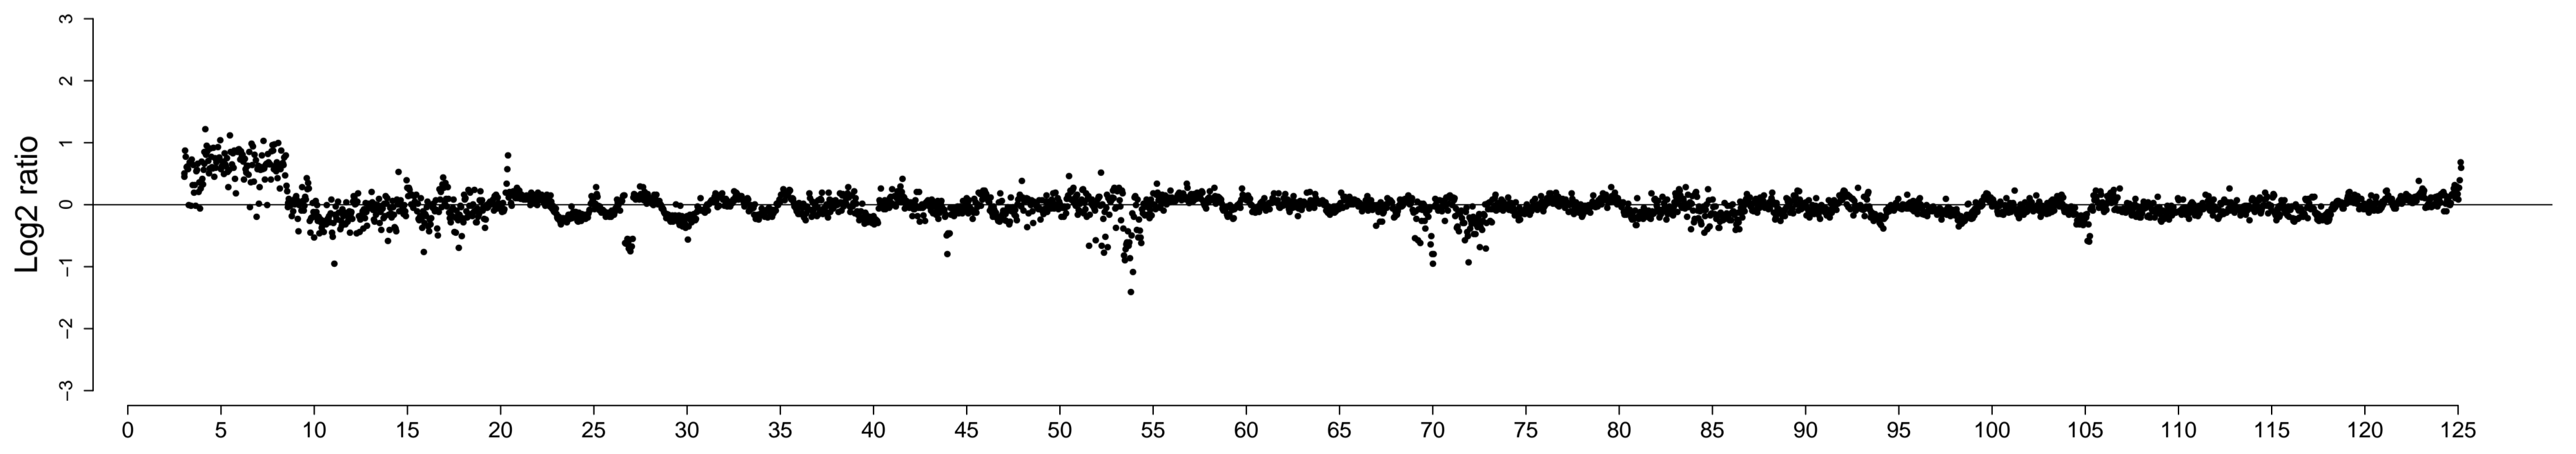

chr14:HTG2 p11

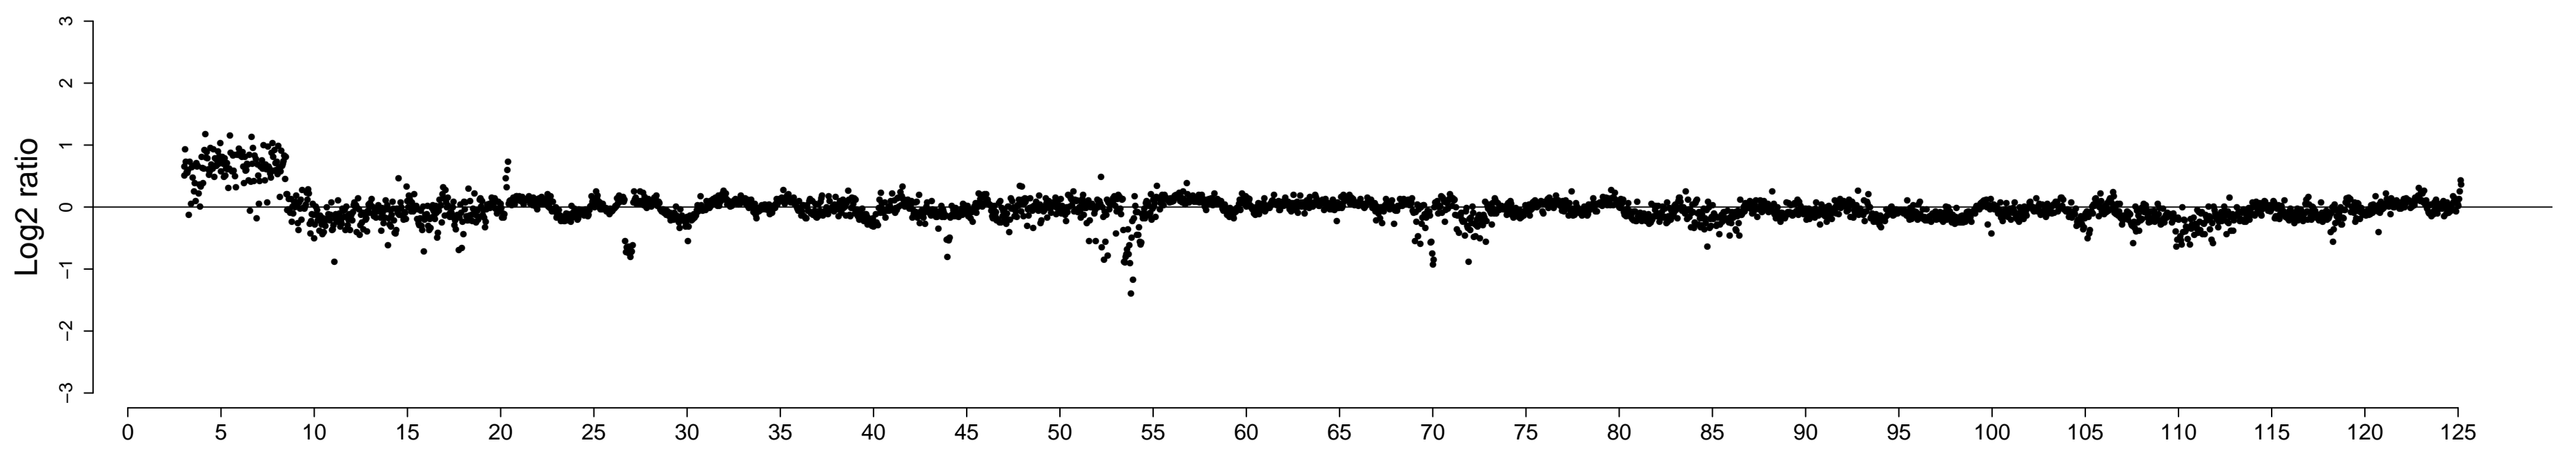

chr15:CBA control kidney

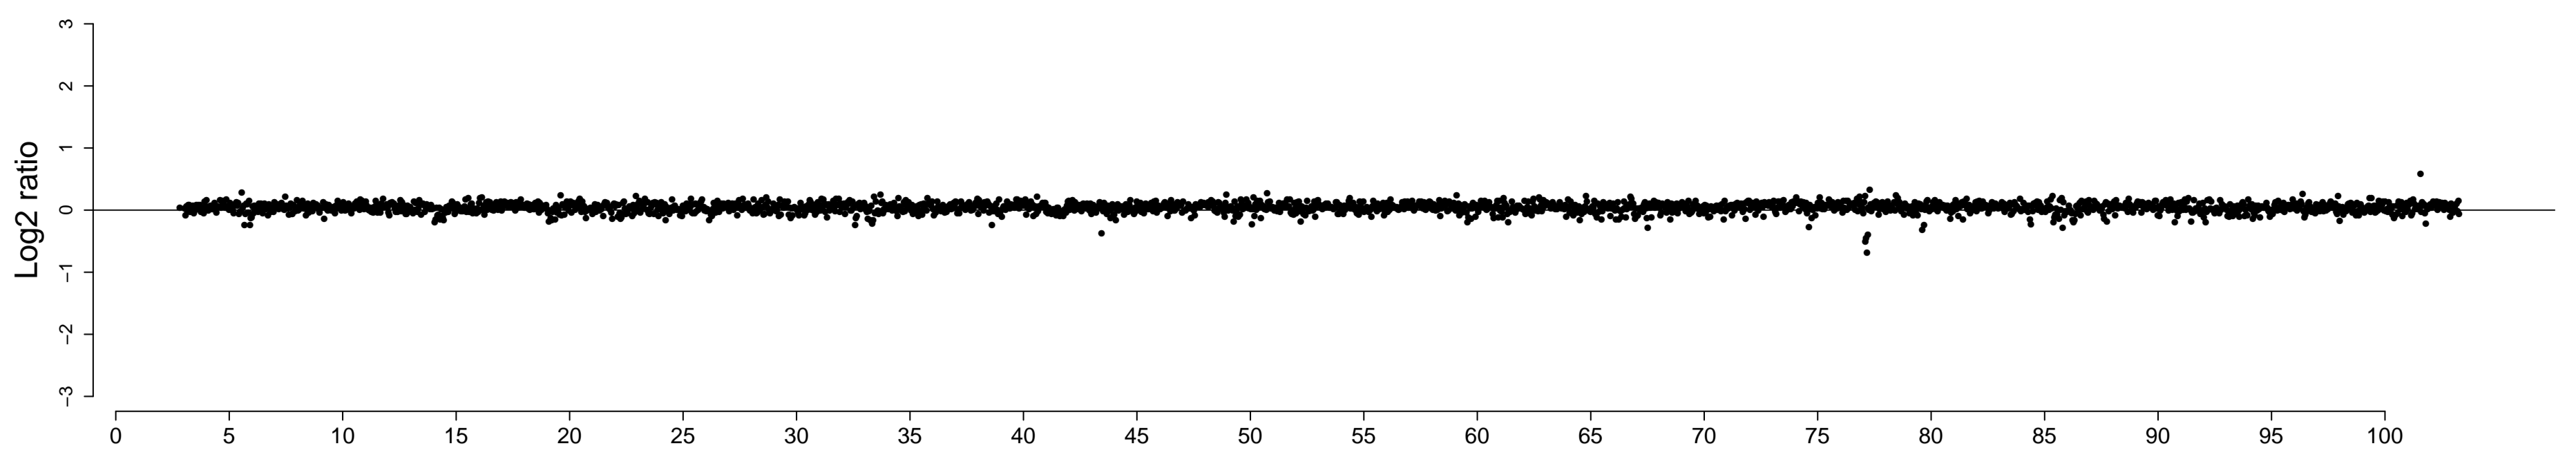

chr15:HAP1 p25

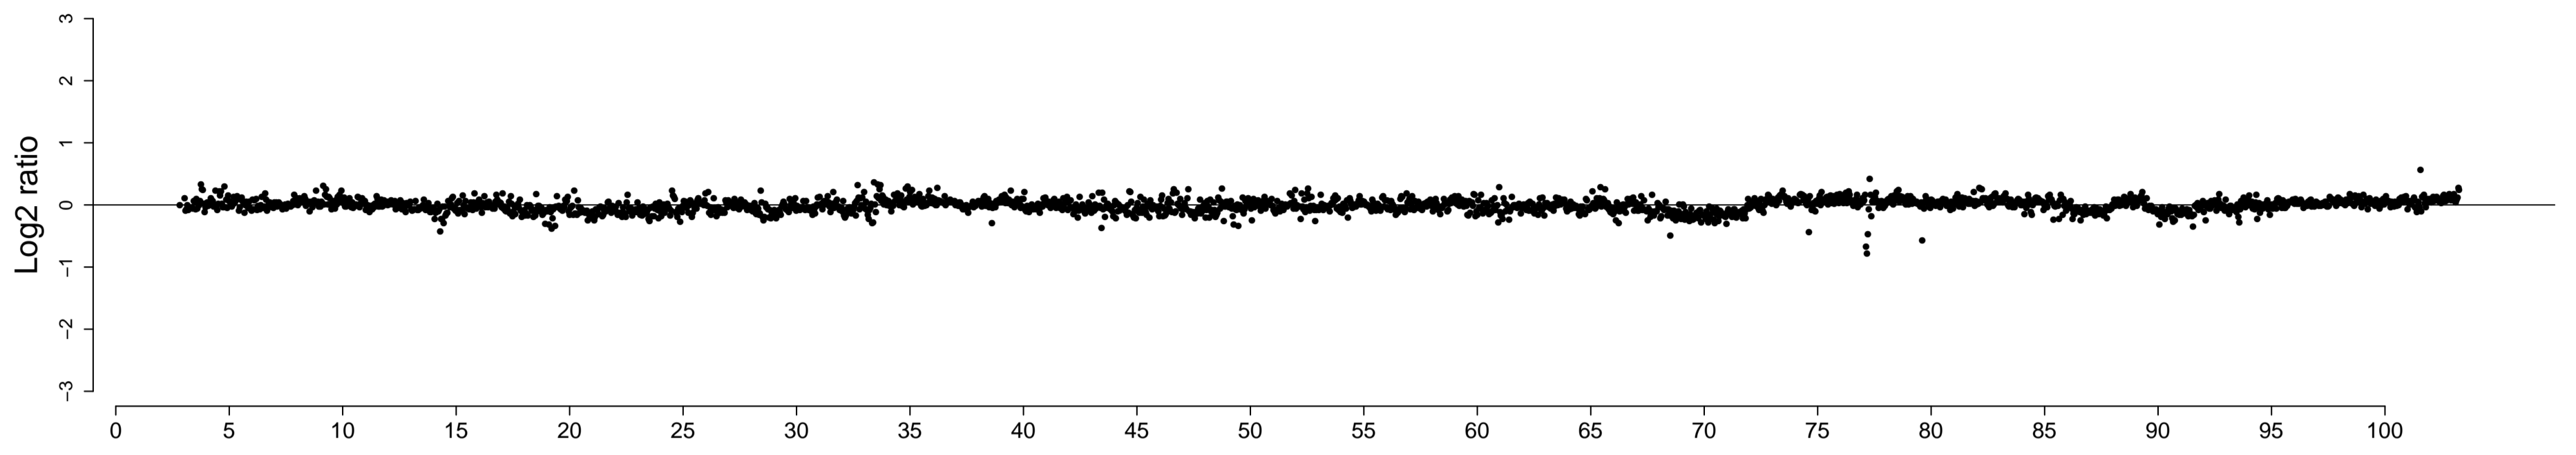

chr15:HAP2 p18

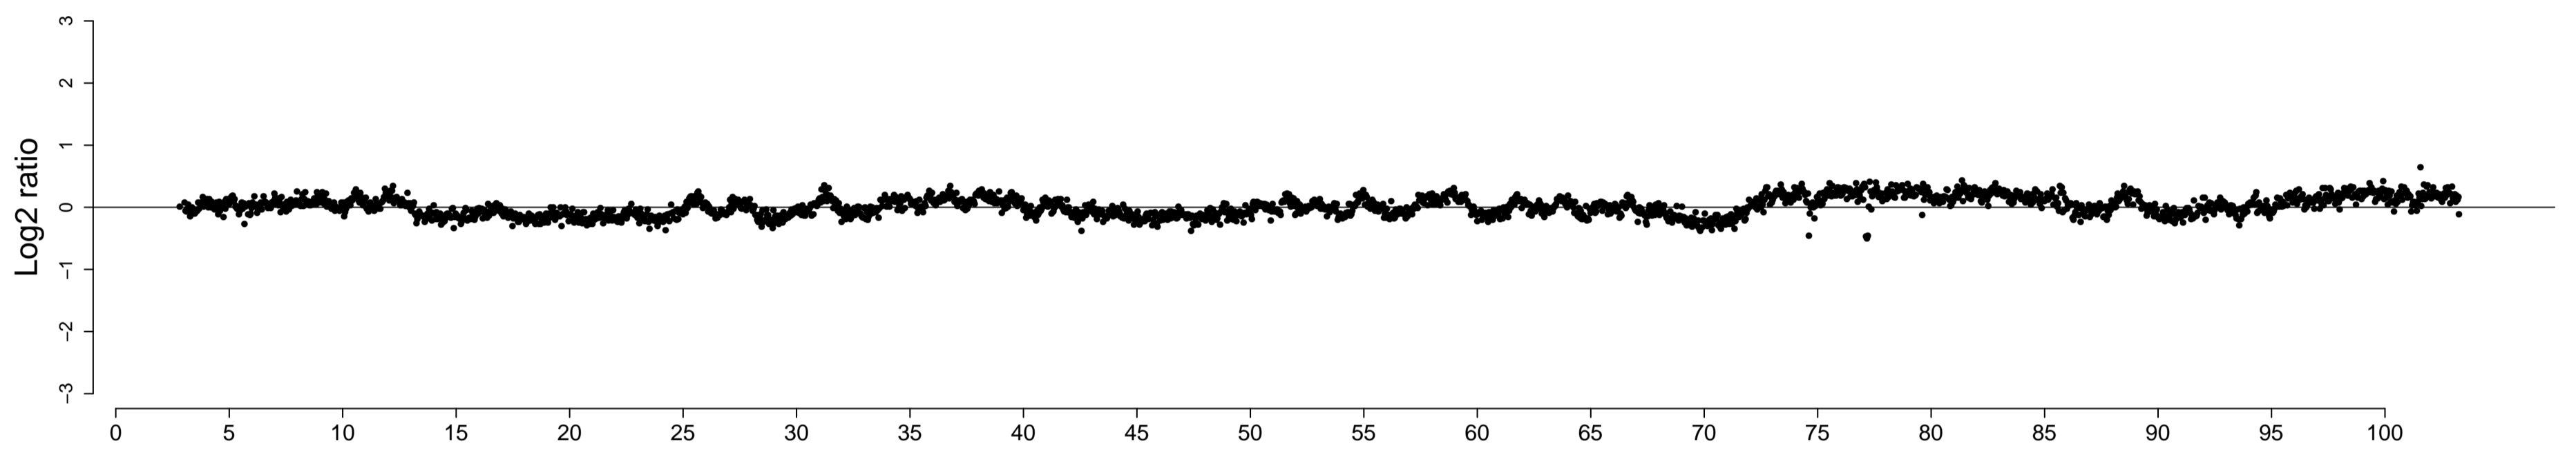

chr15:HTG\_control male kidney

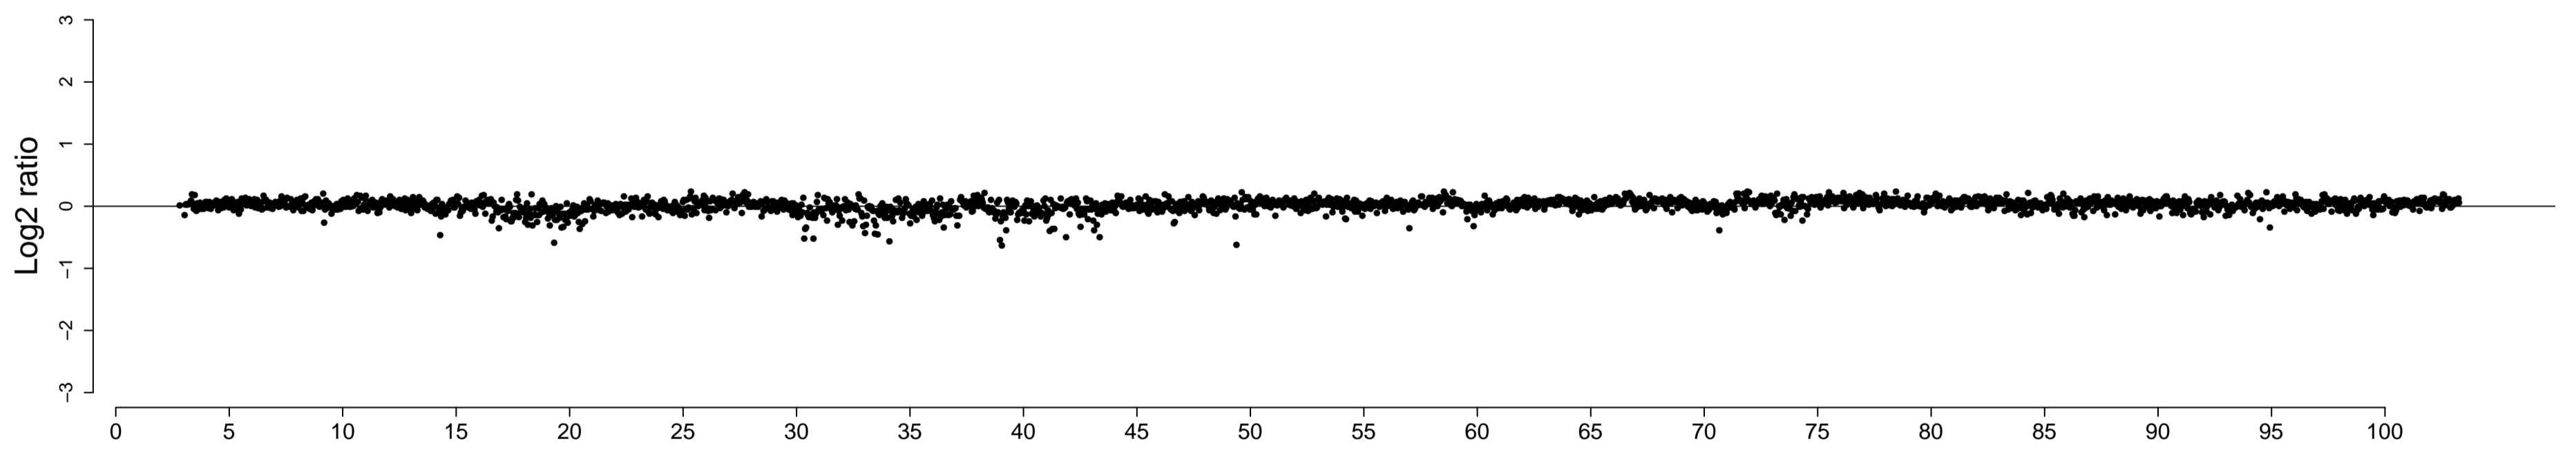

chr15:HTG1 p11

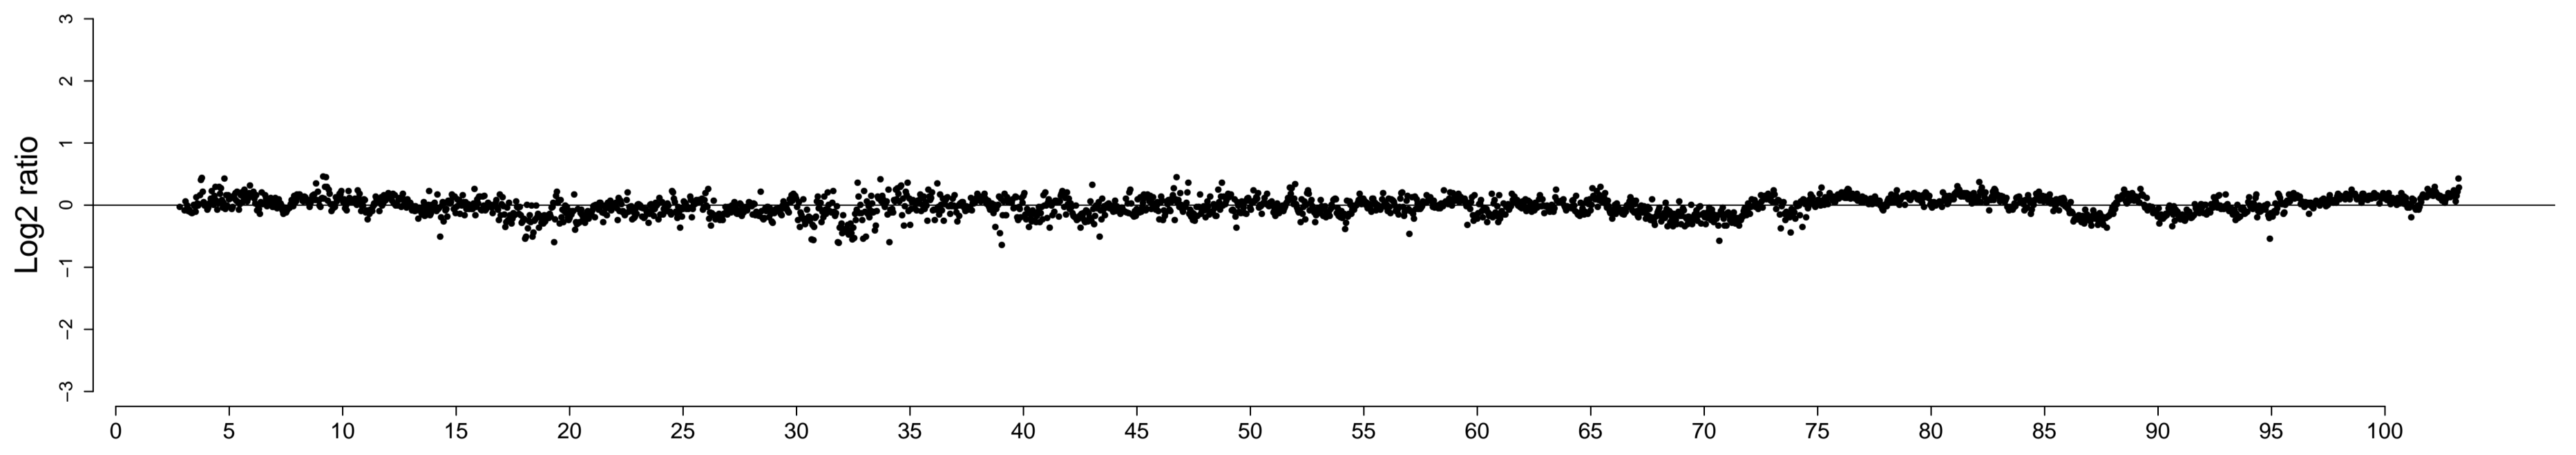

chr15:HTG2 p11

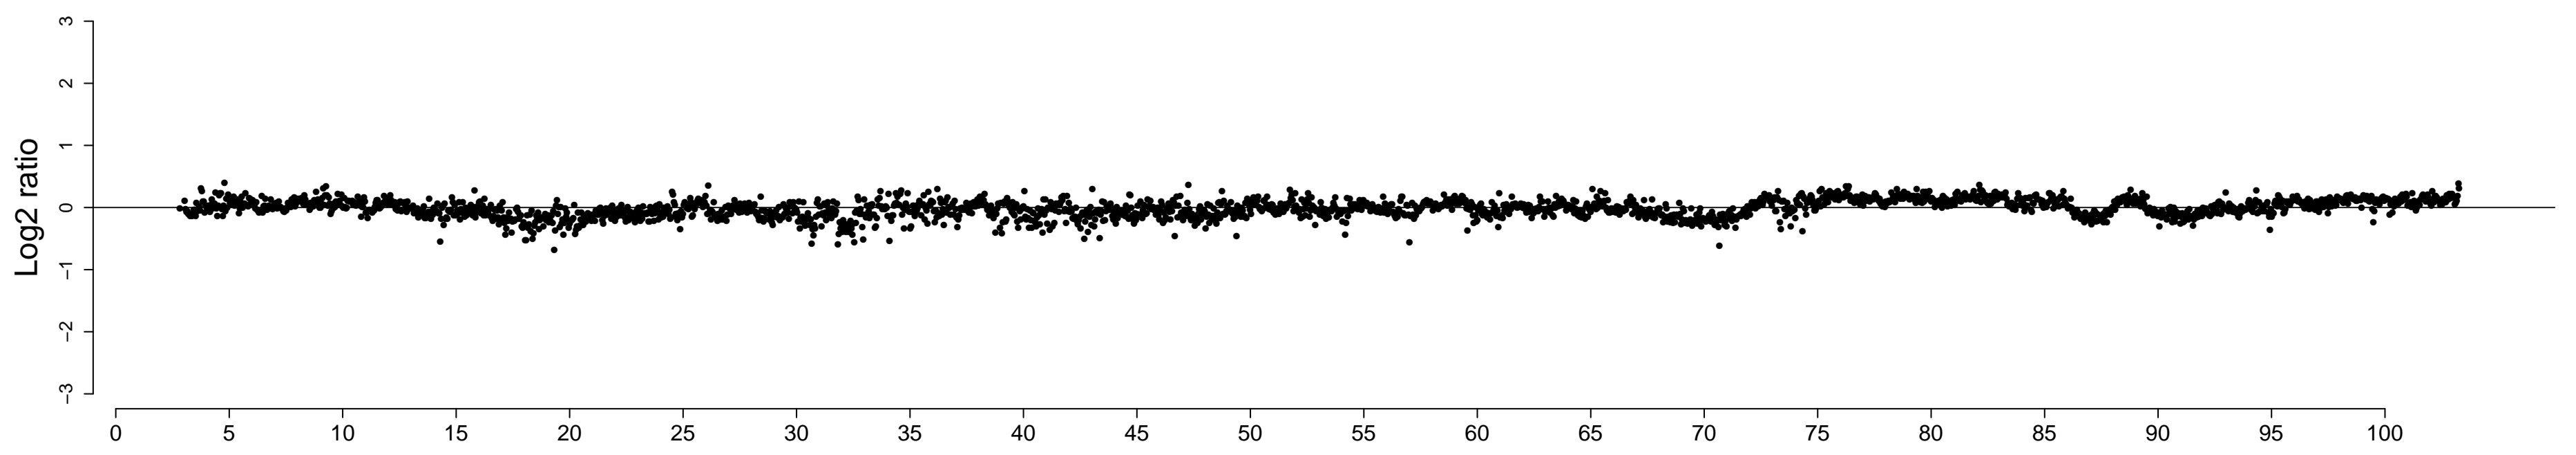

chr16:CBA control kidney

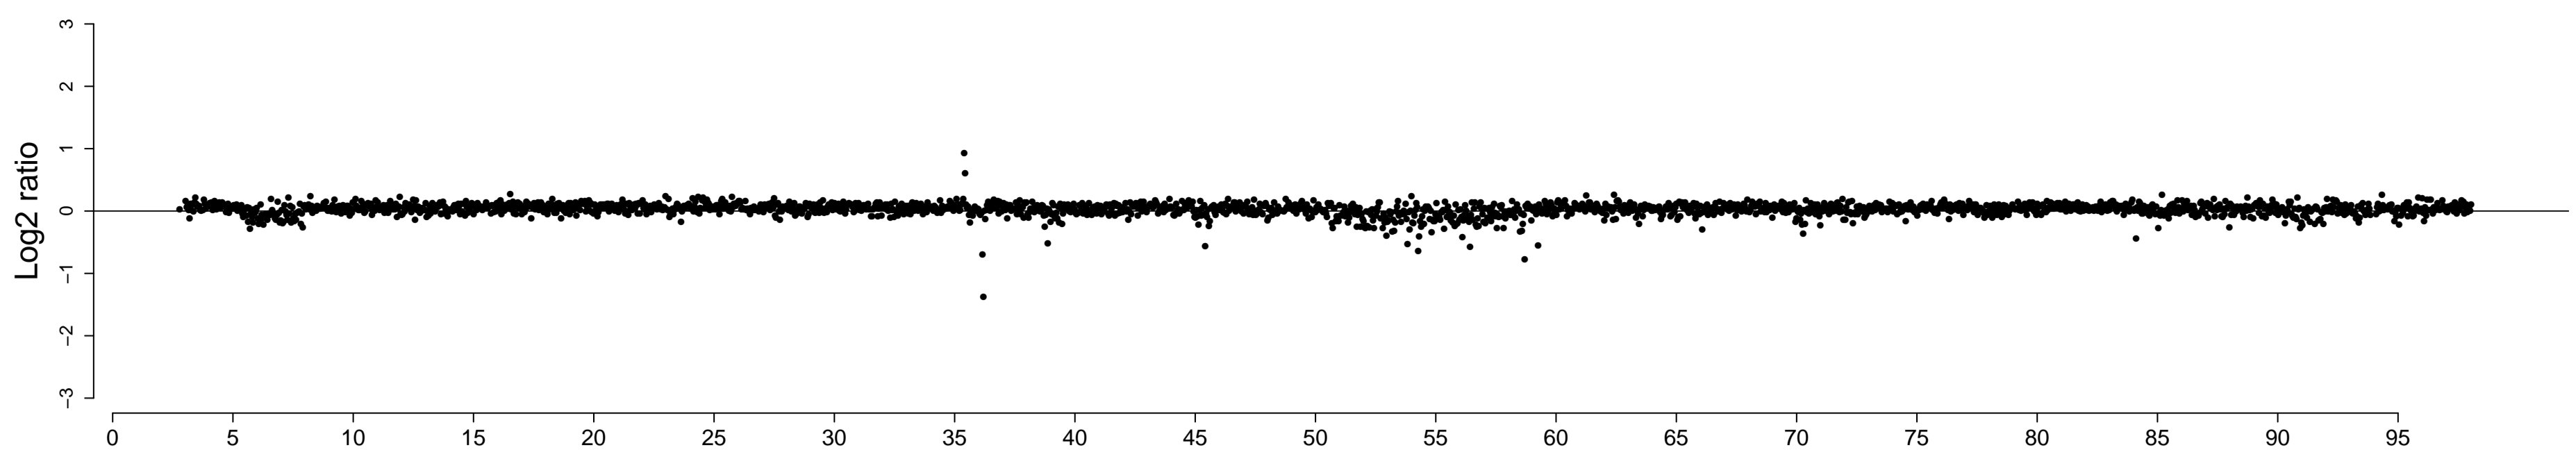

chr16:HAP1 p25

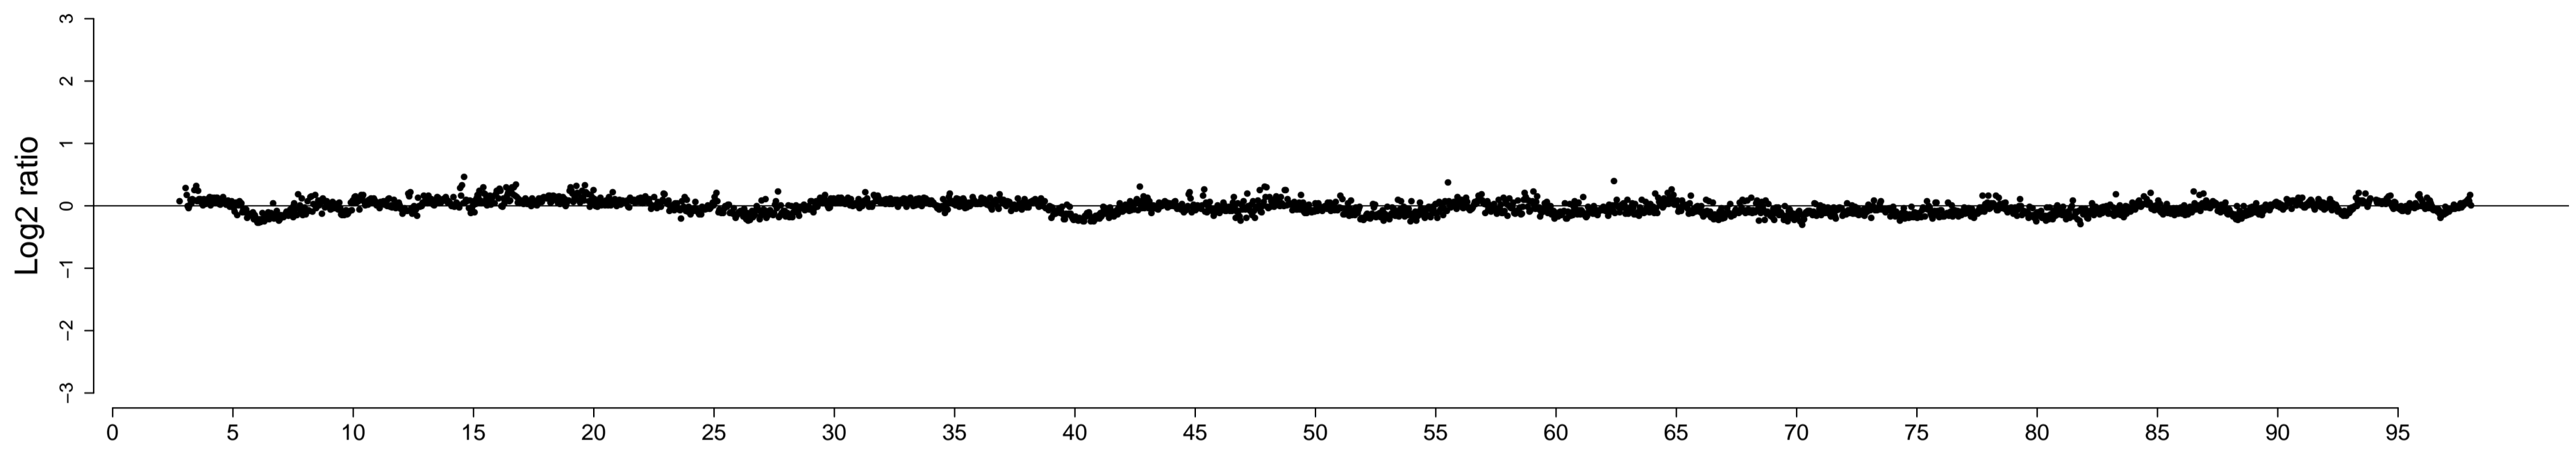

chr16:HAP2 p18

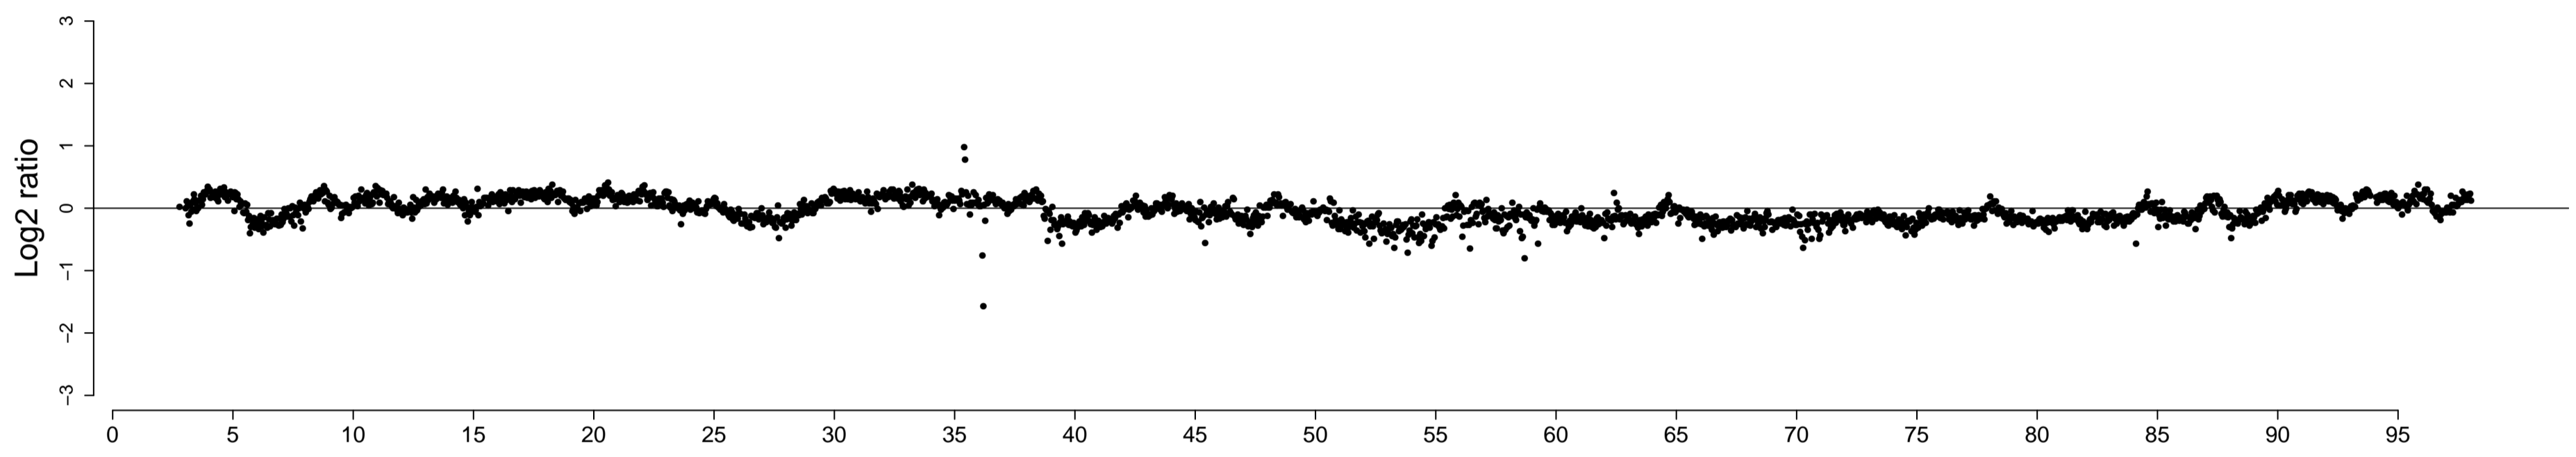

chr16:HTG\_control male kidney

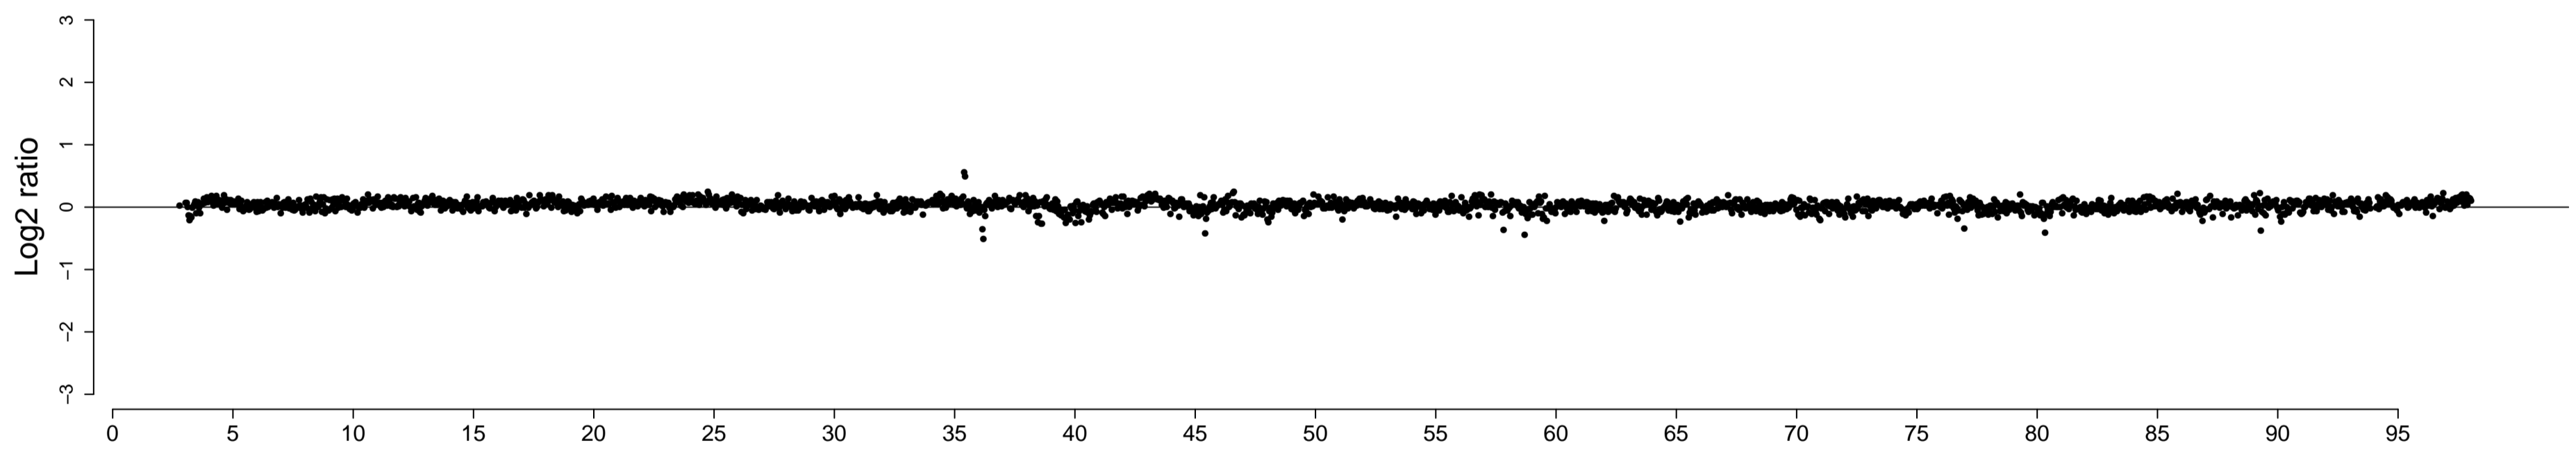

chr16:HTG1 p11

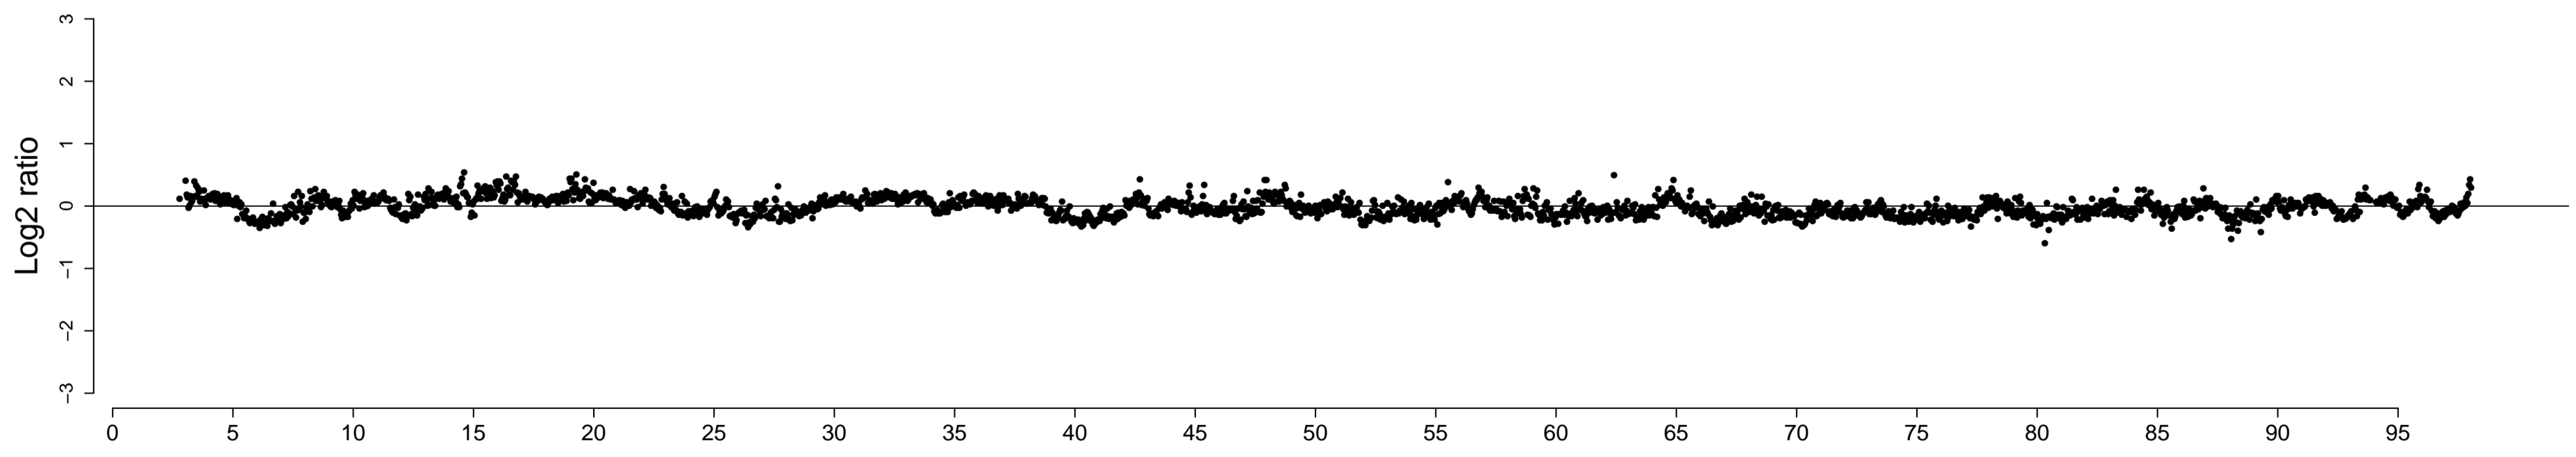

chr16:HTG2 p11

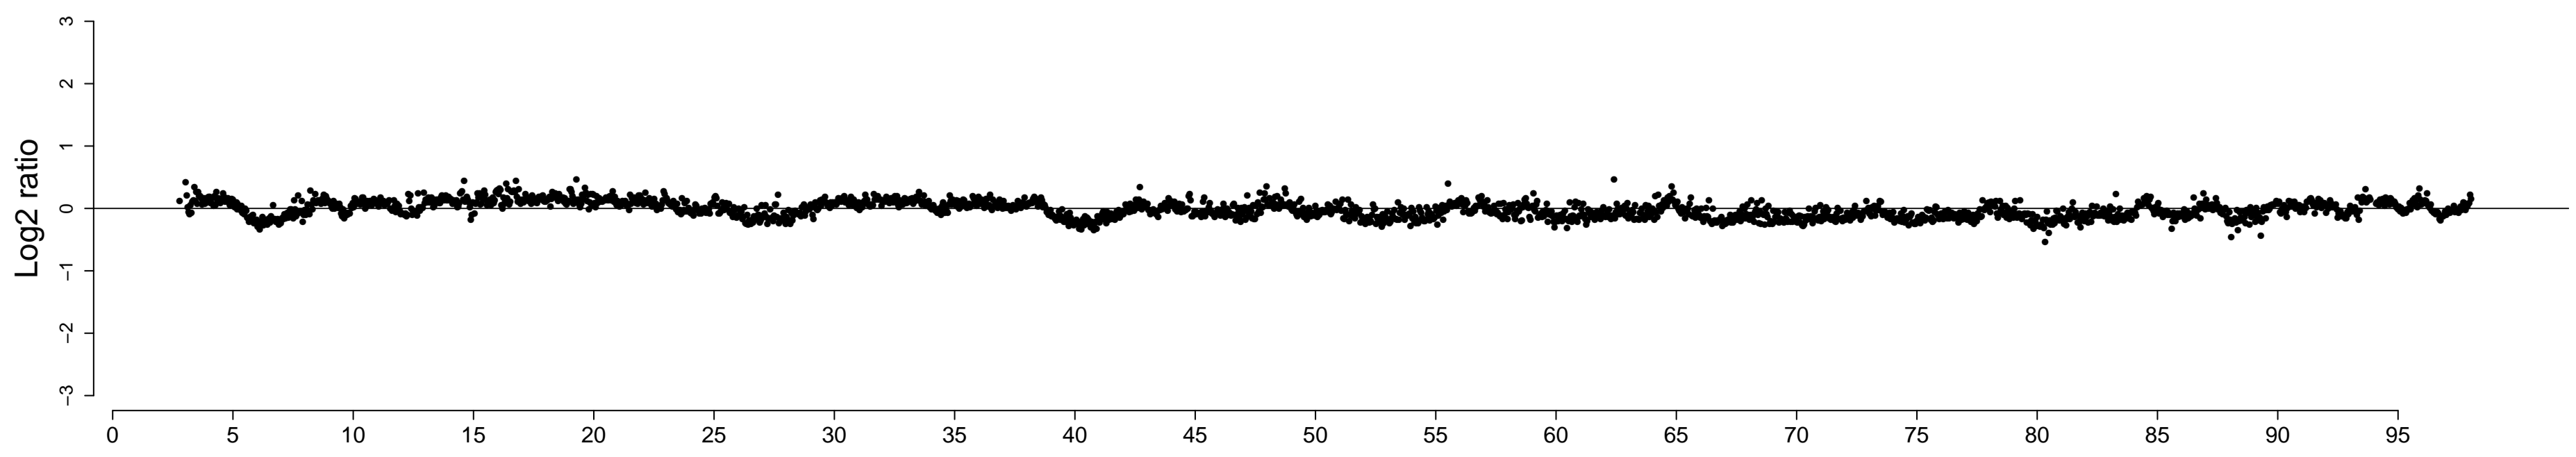

chr17:CBA control kidney

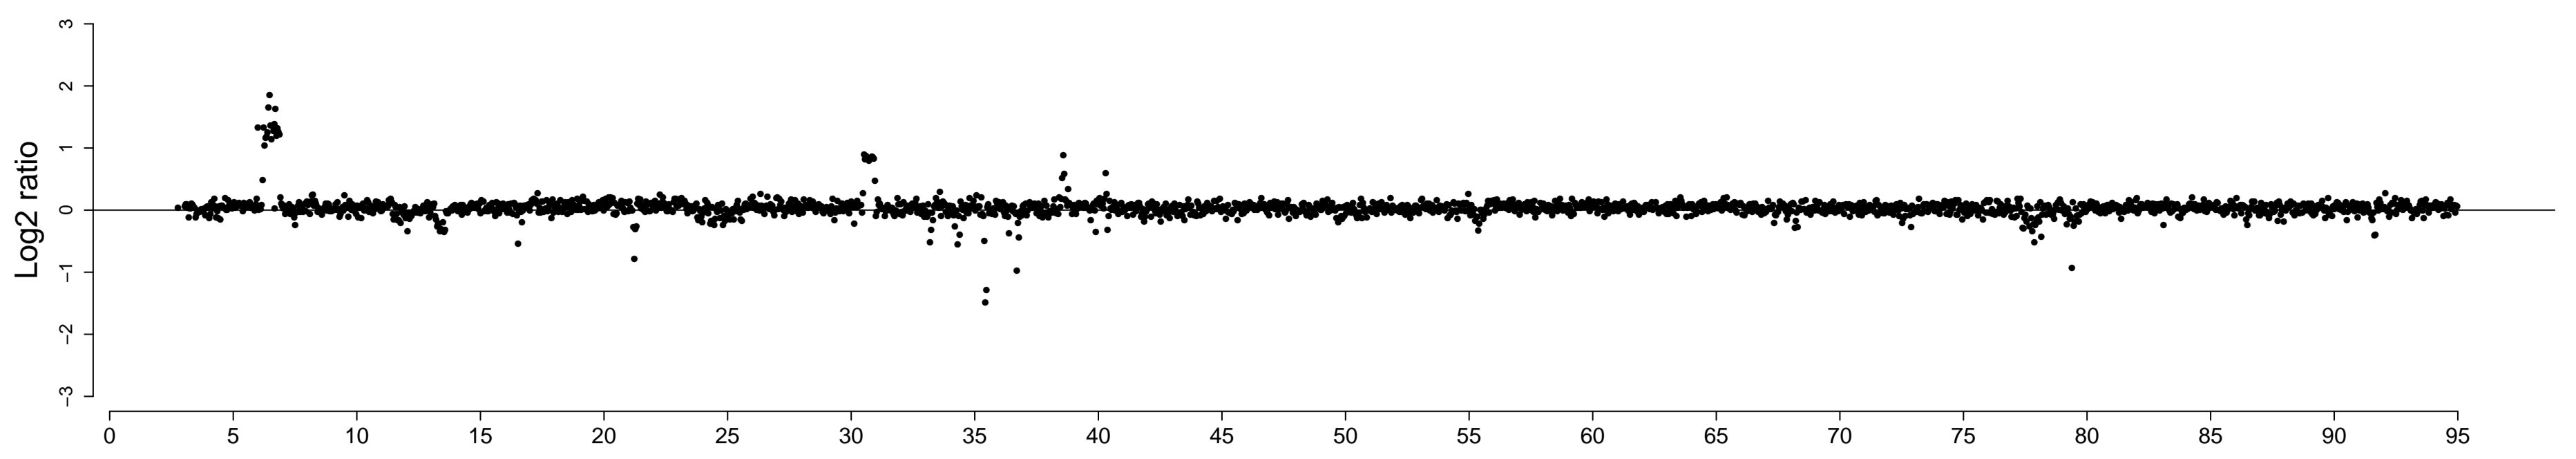

chr17:HAP1 p25

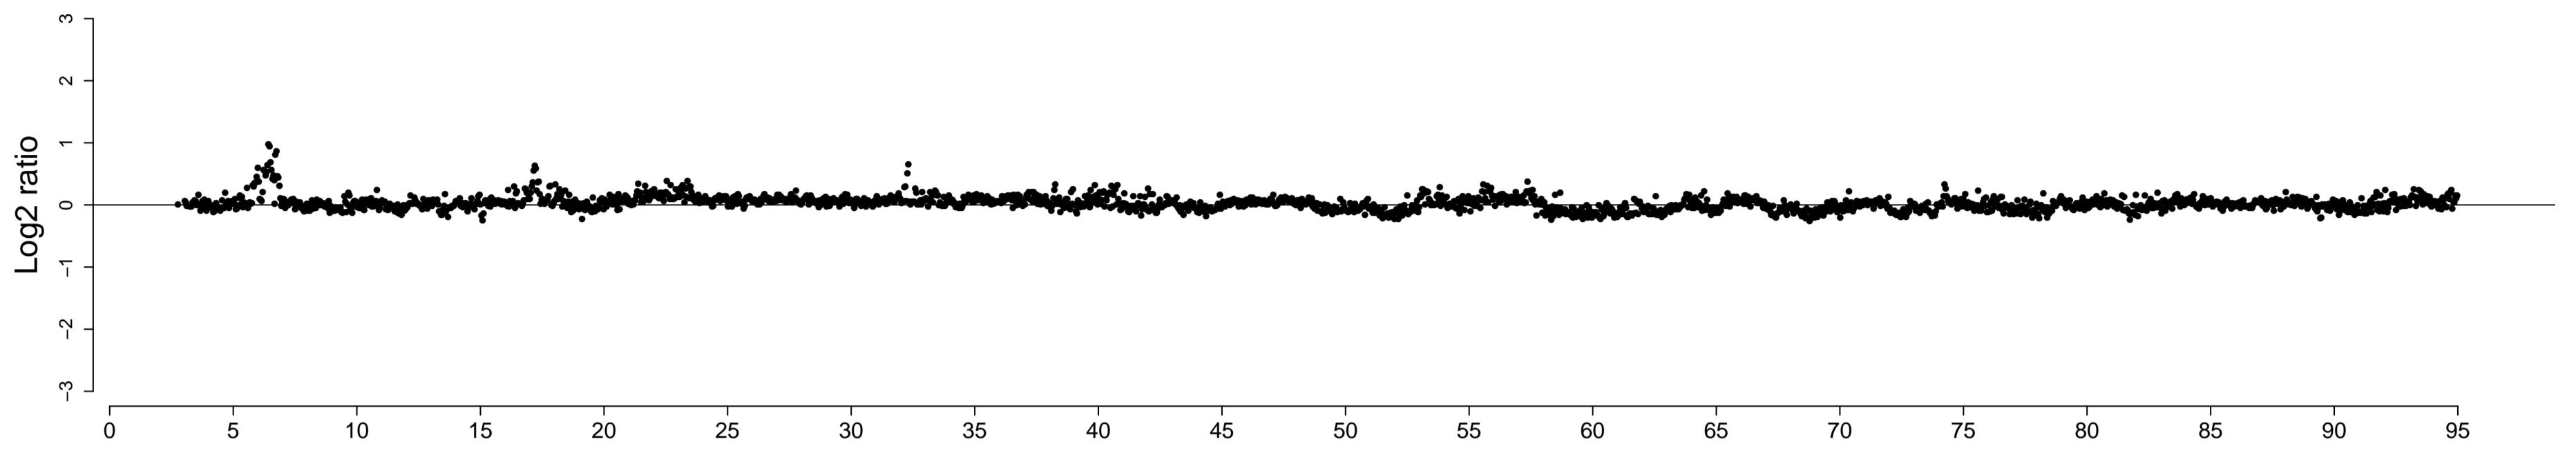

chr17:HAP2 p18

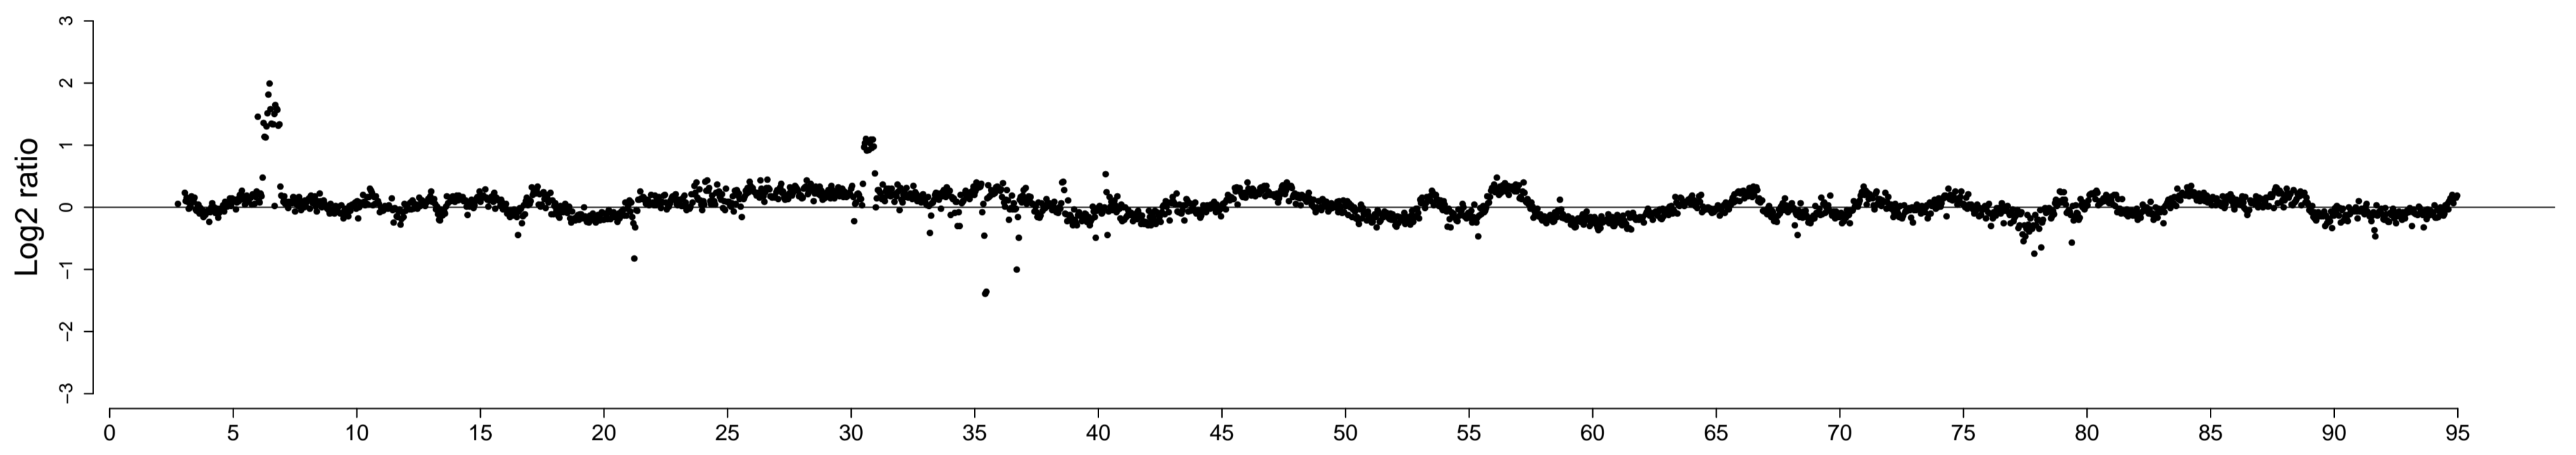

chr17:HTG\_control male kidney

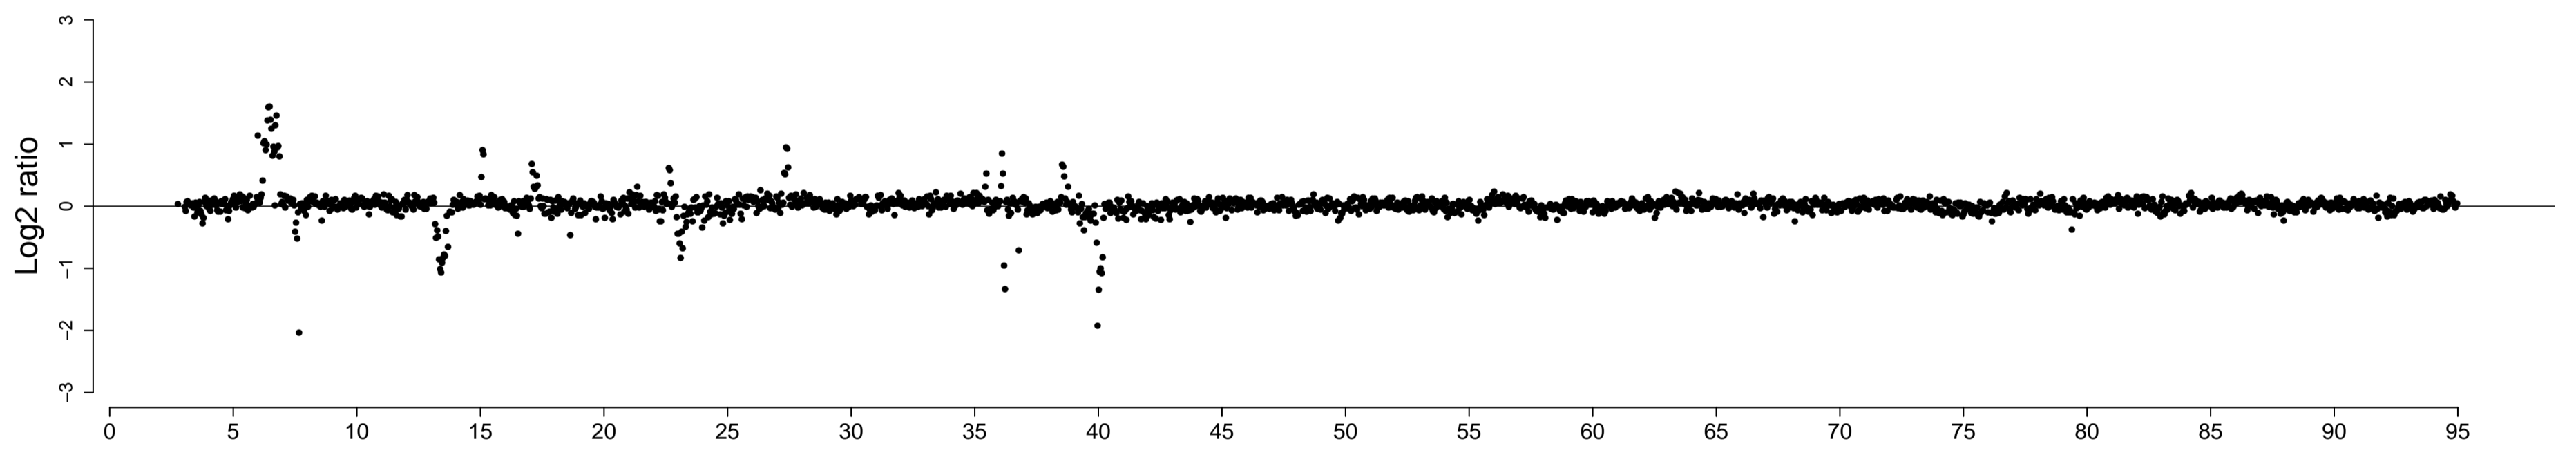

chr17:HTG1 p11

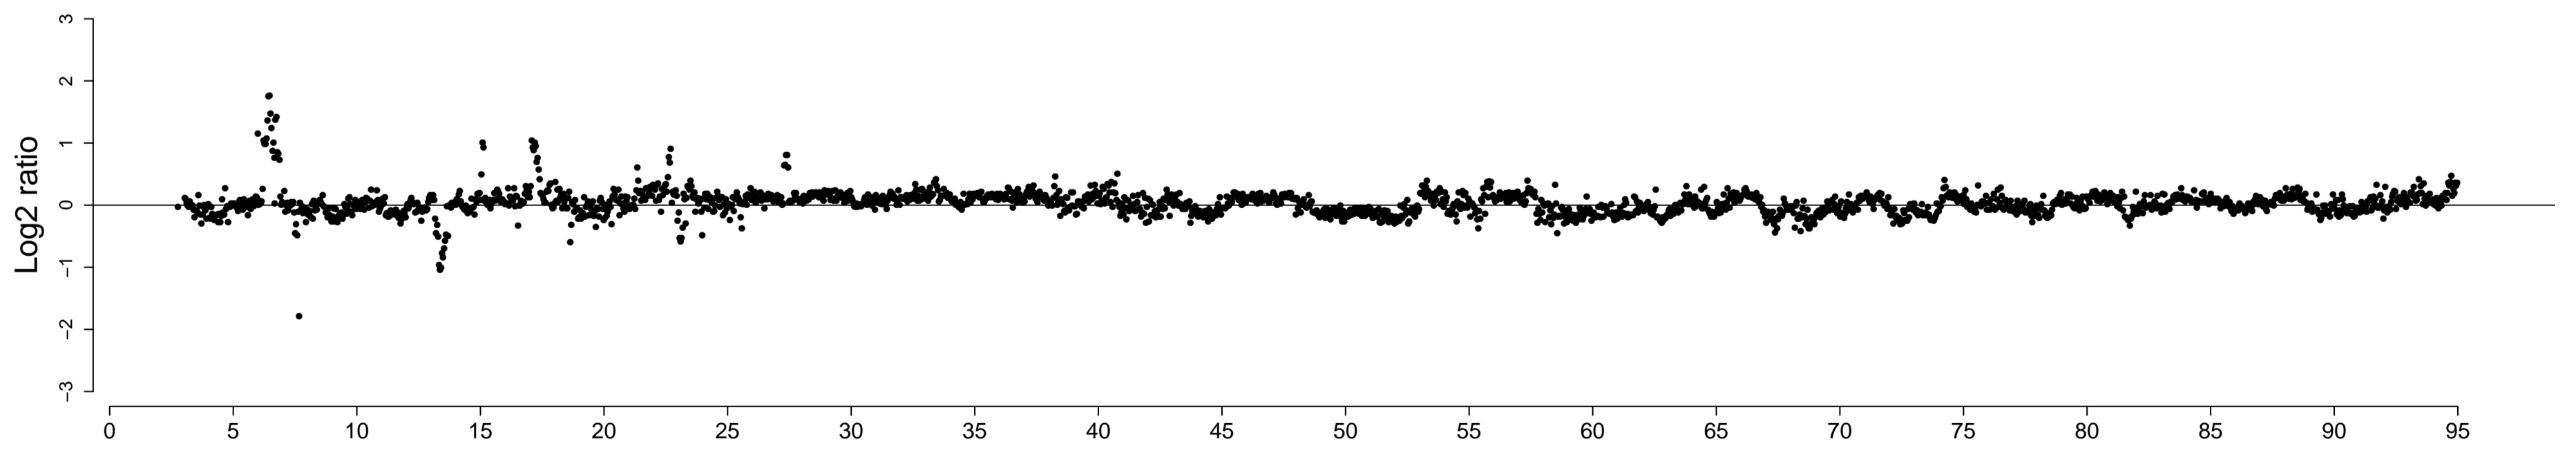

chr17:HTG2 p11

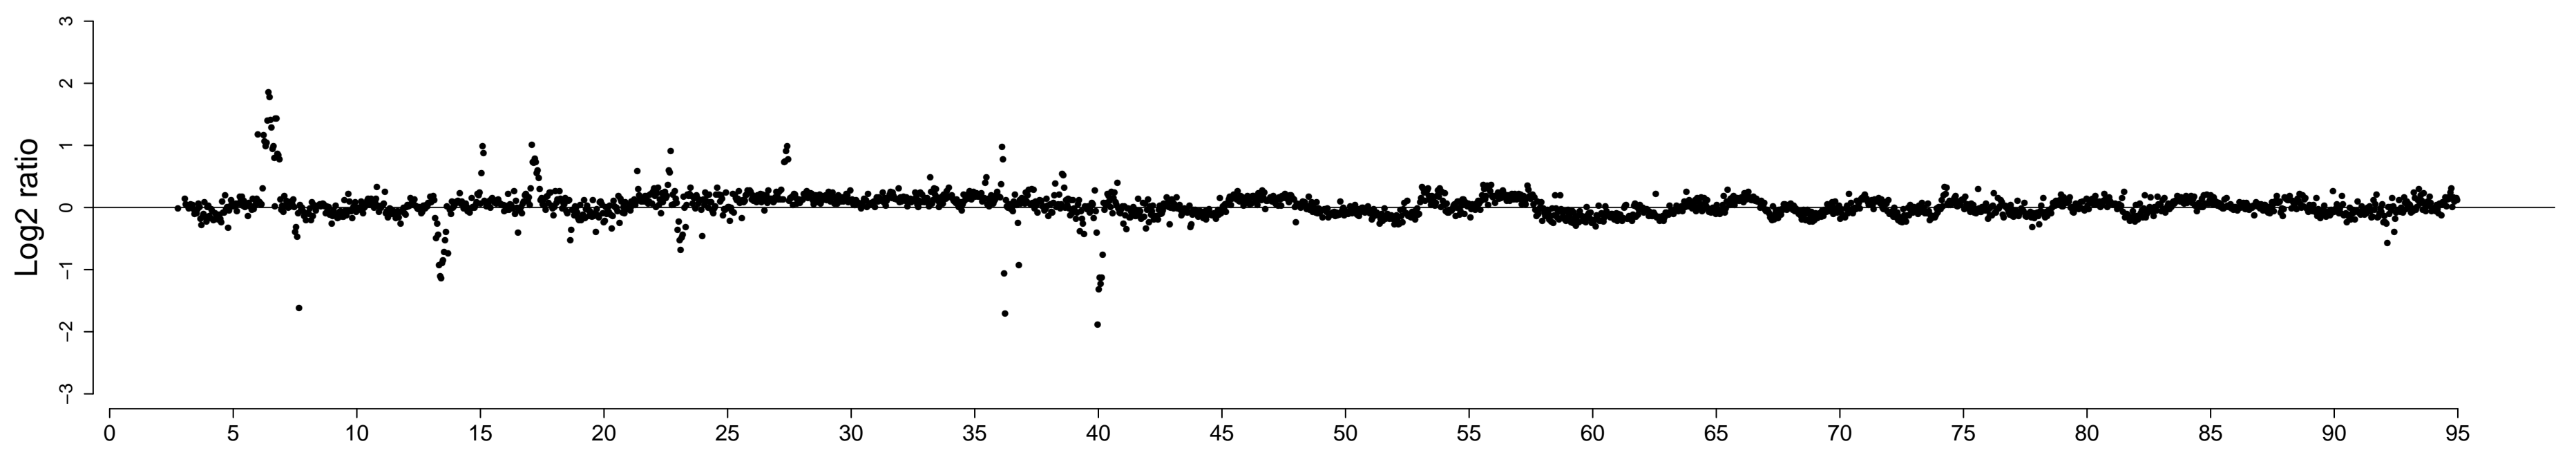

chr18:CBA control kidney

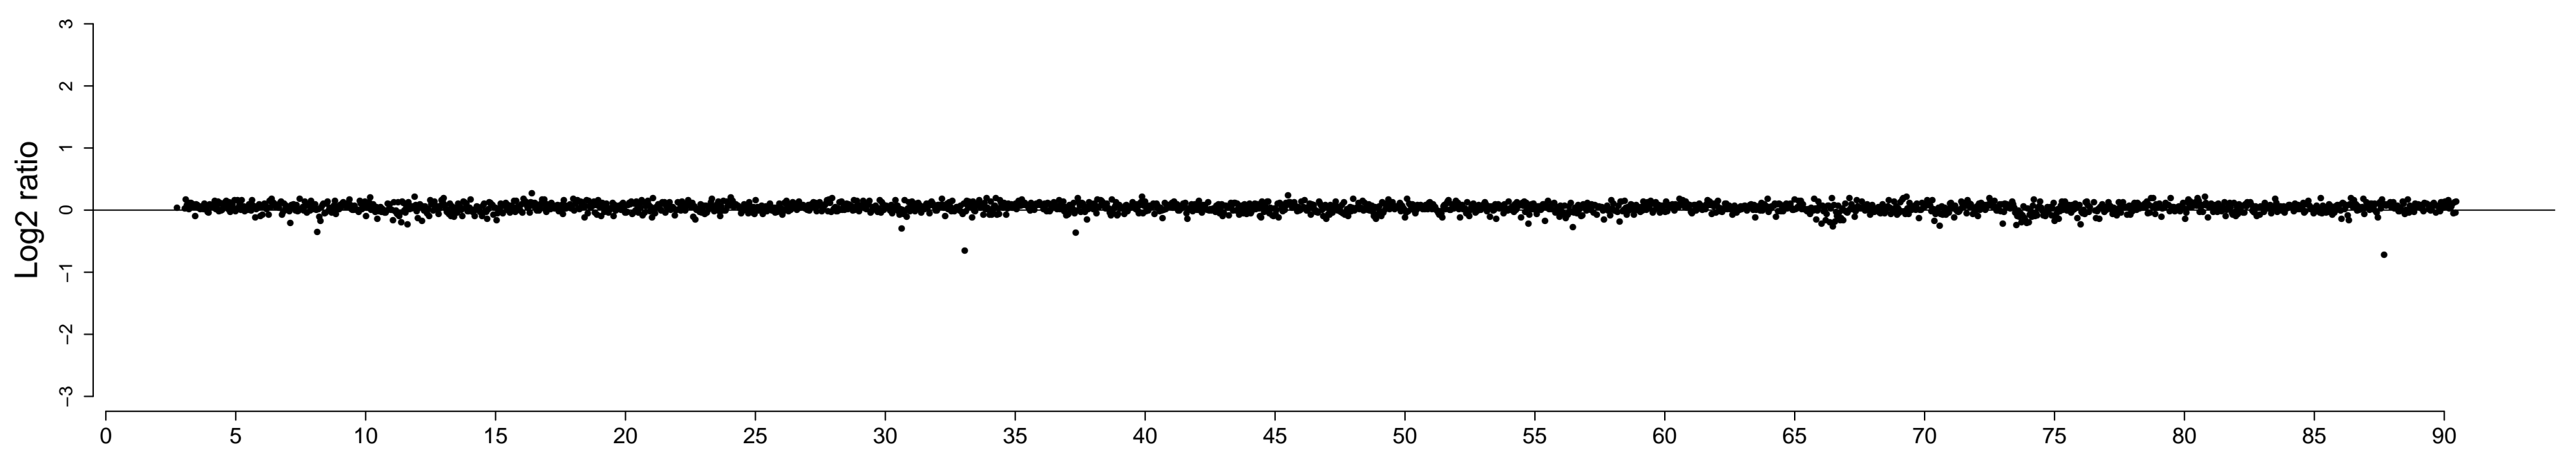

chr18:HAP1 p25

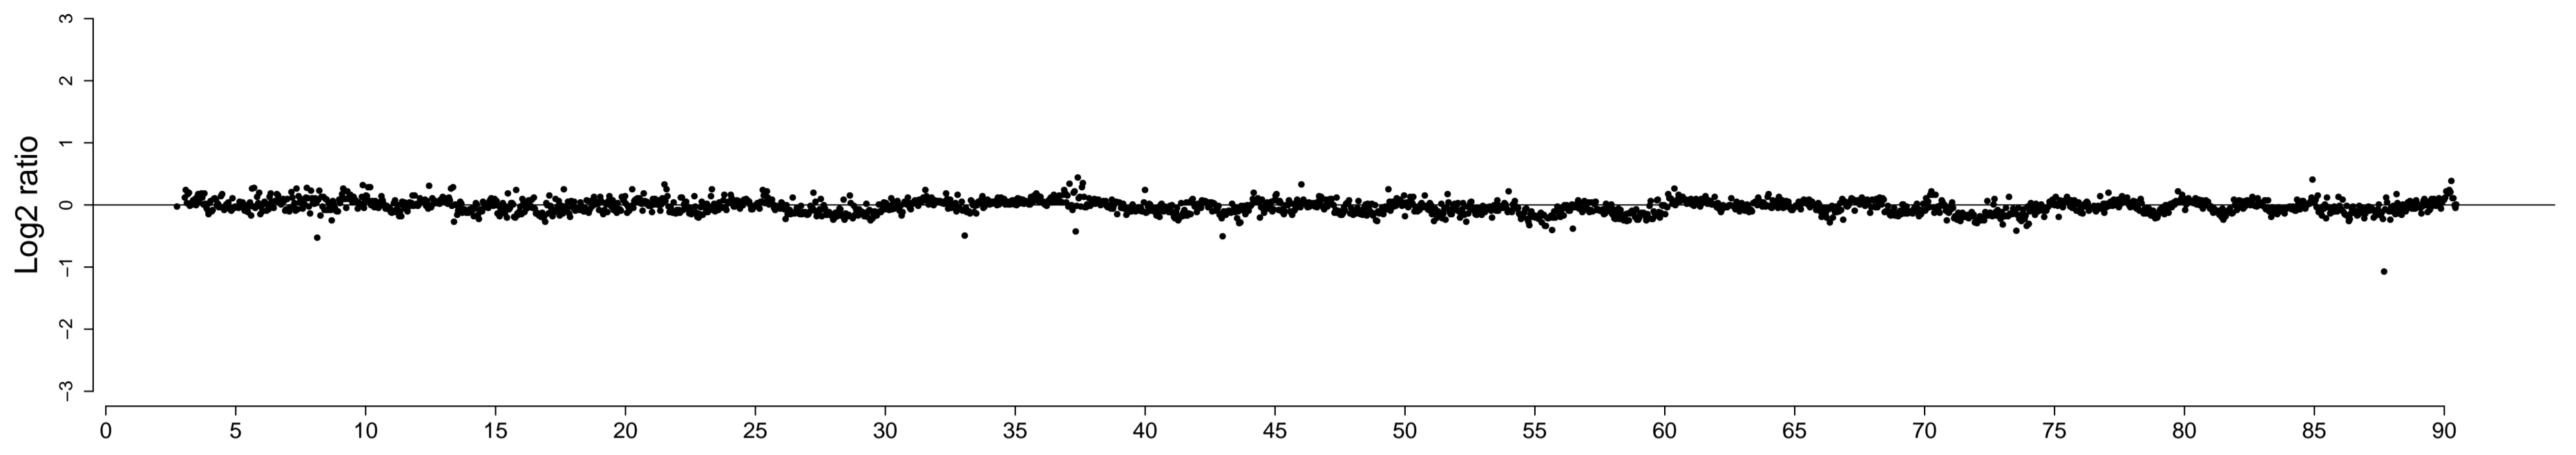

chr18:HAP2 p18

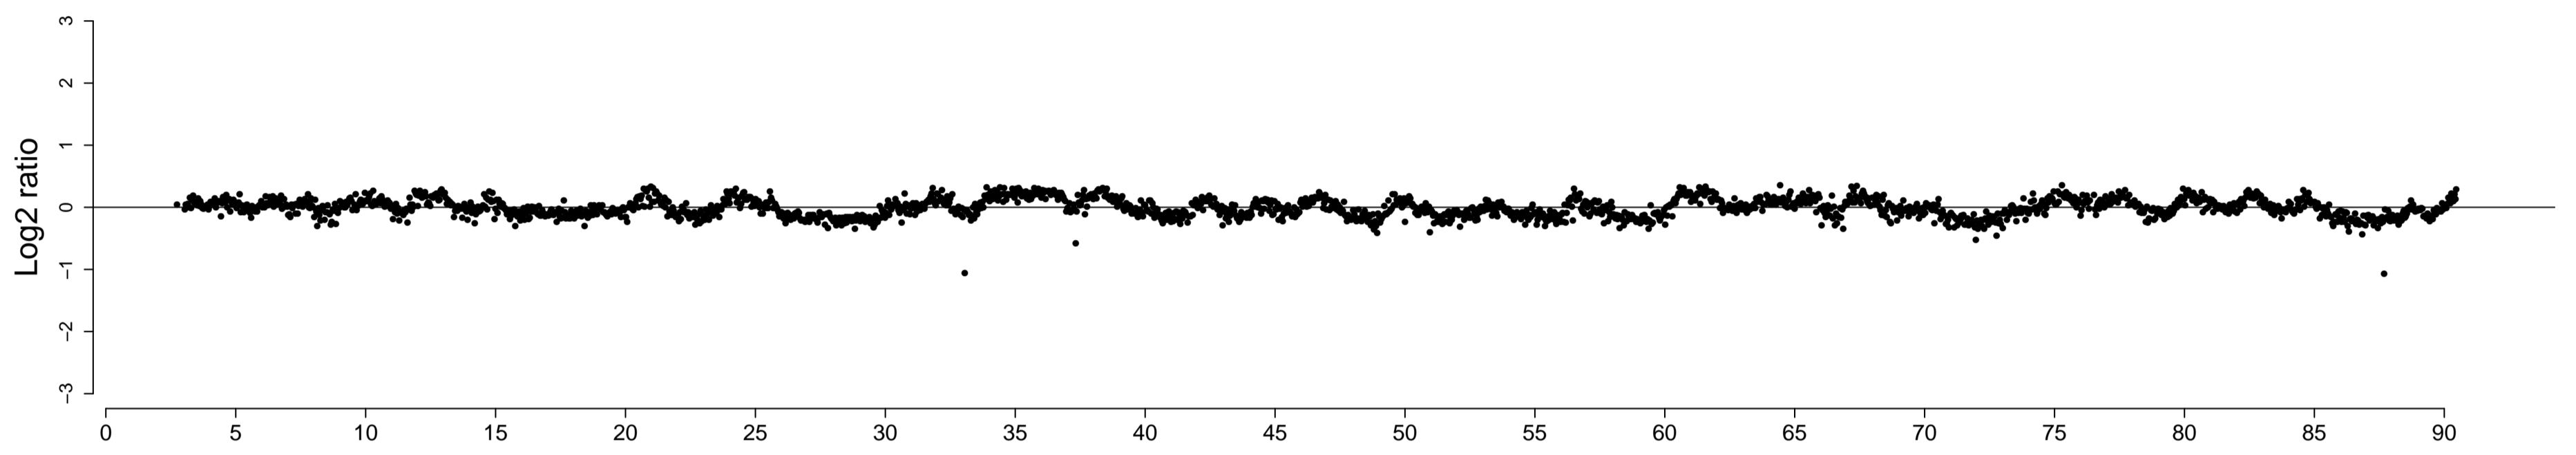

chr18:HTG\_control male kidney

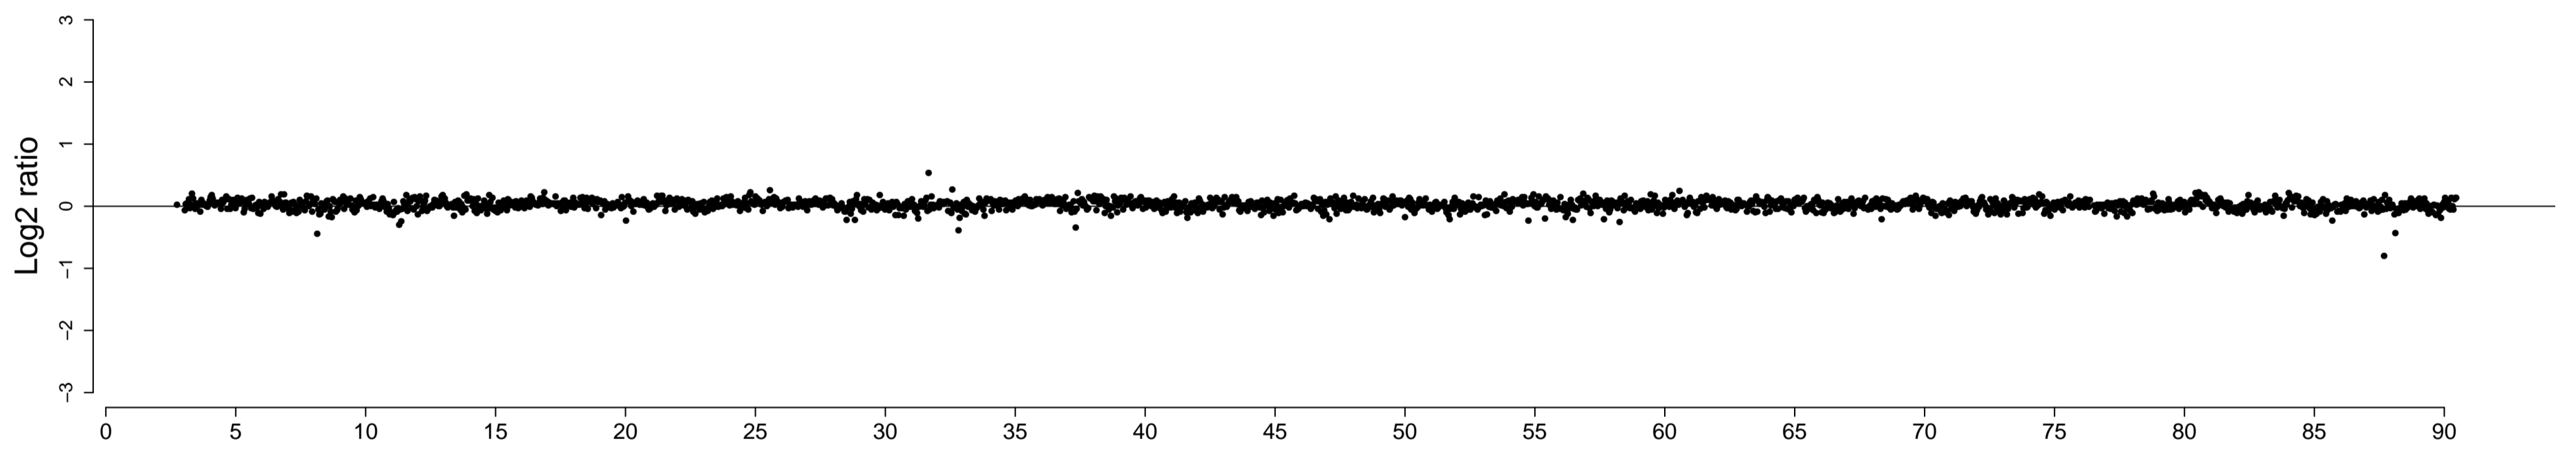

chr18:HTG1 p11

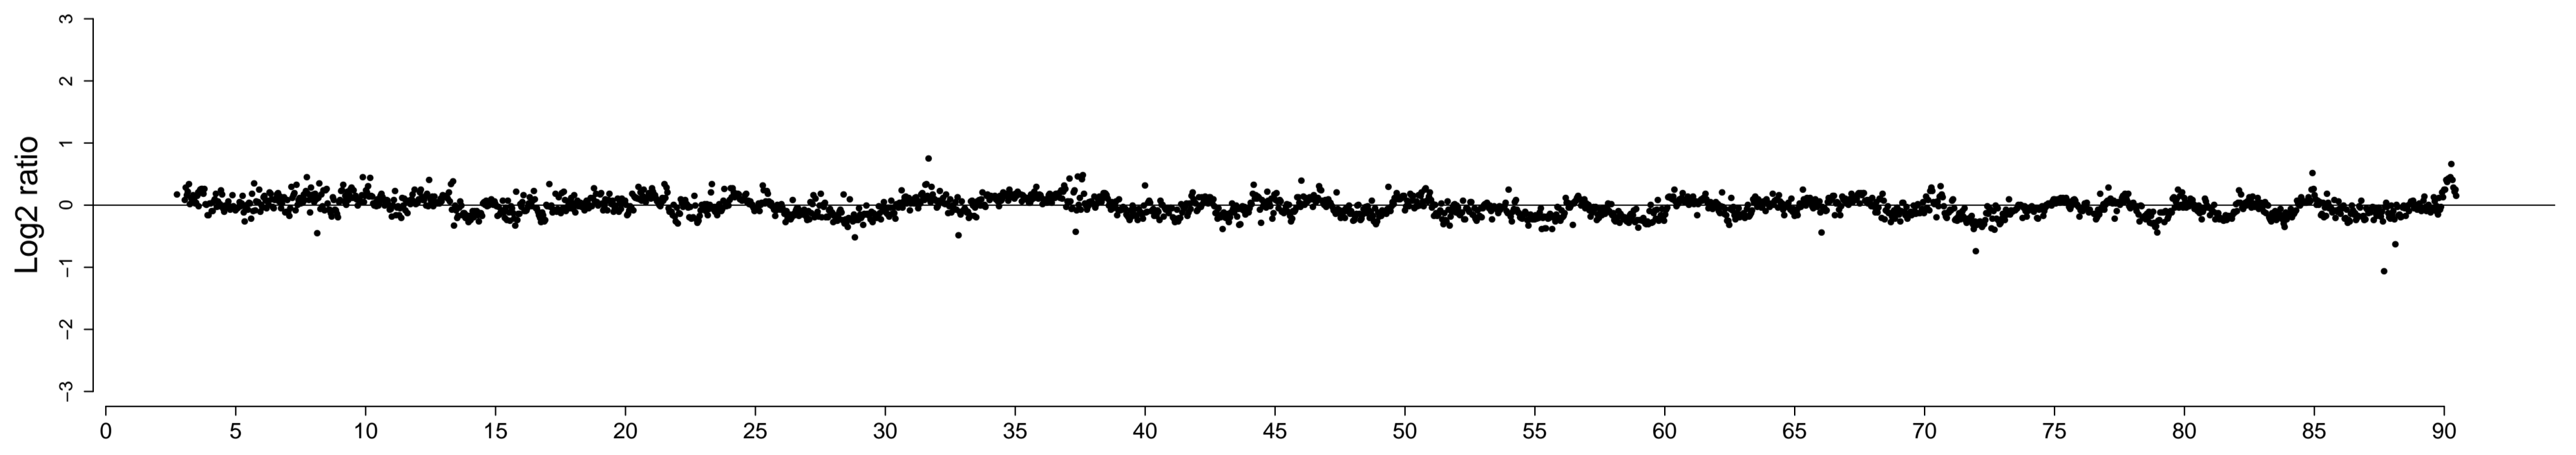

chr18:HTG2 p11

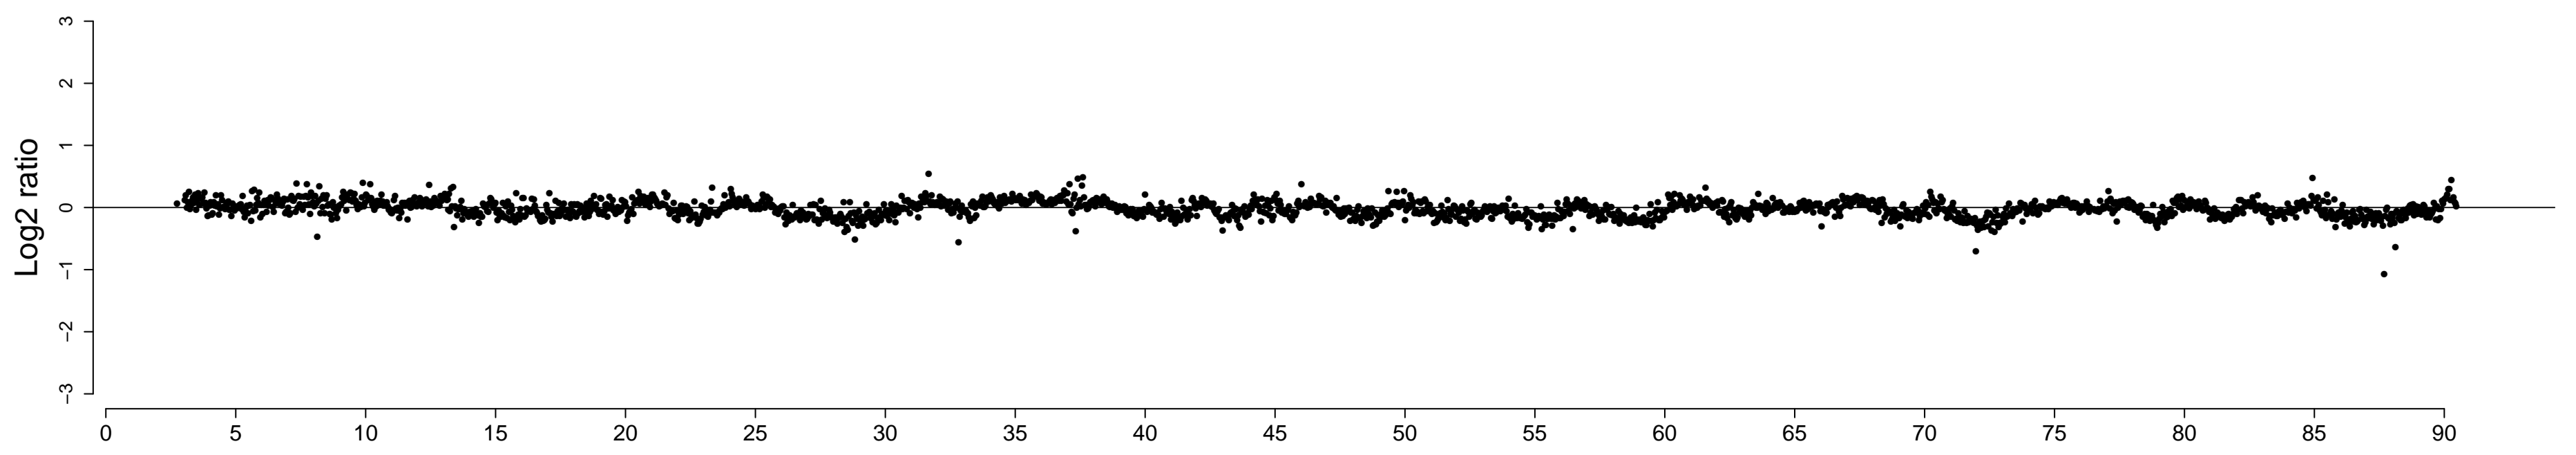

chr19:CBA control kidney

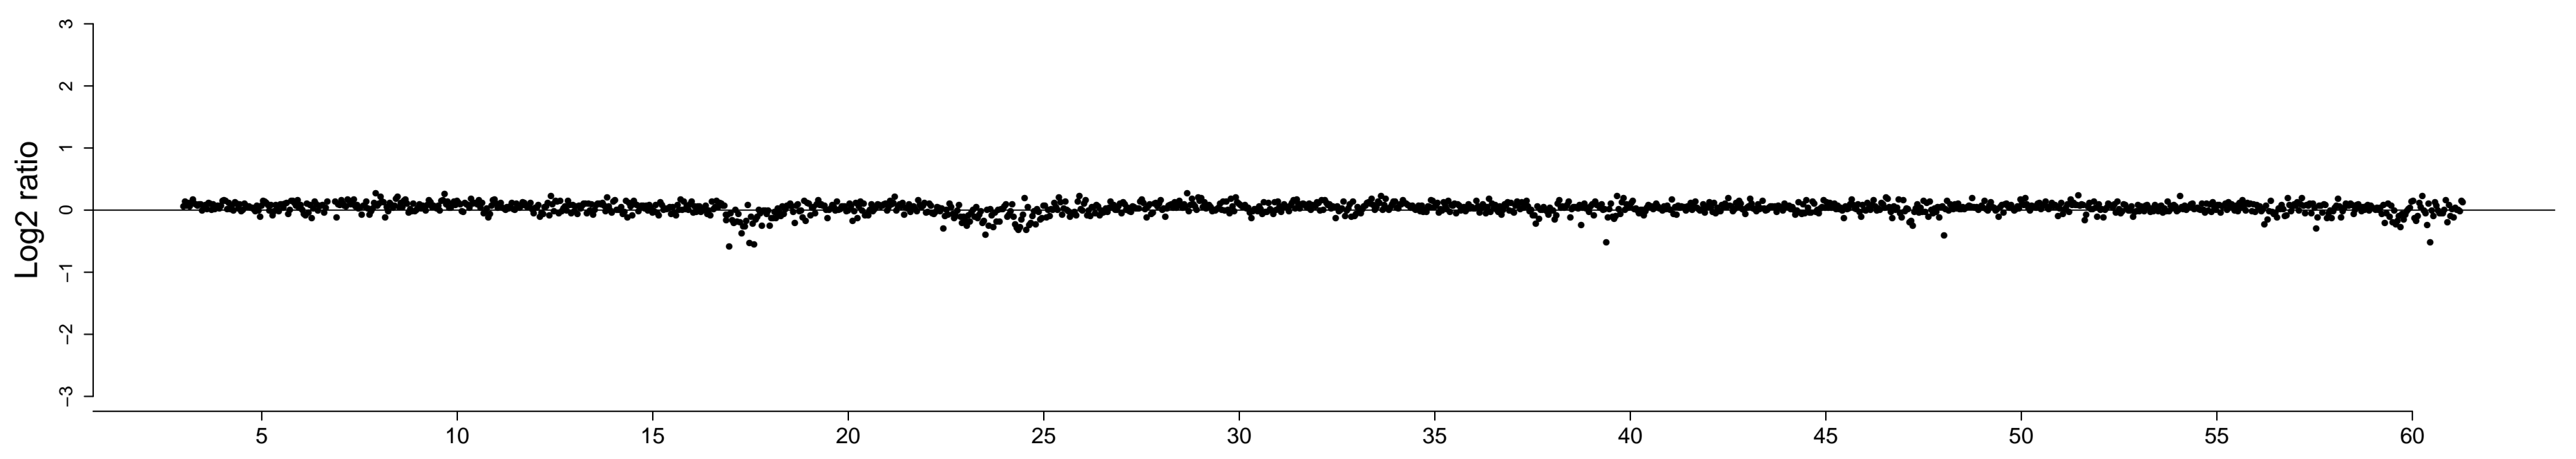

chr19:HAP1 p25

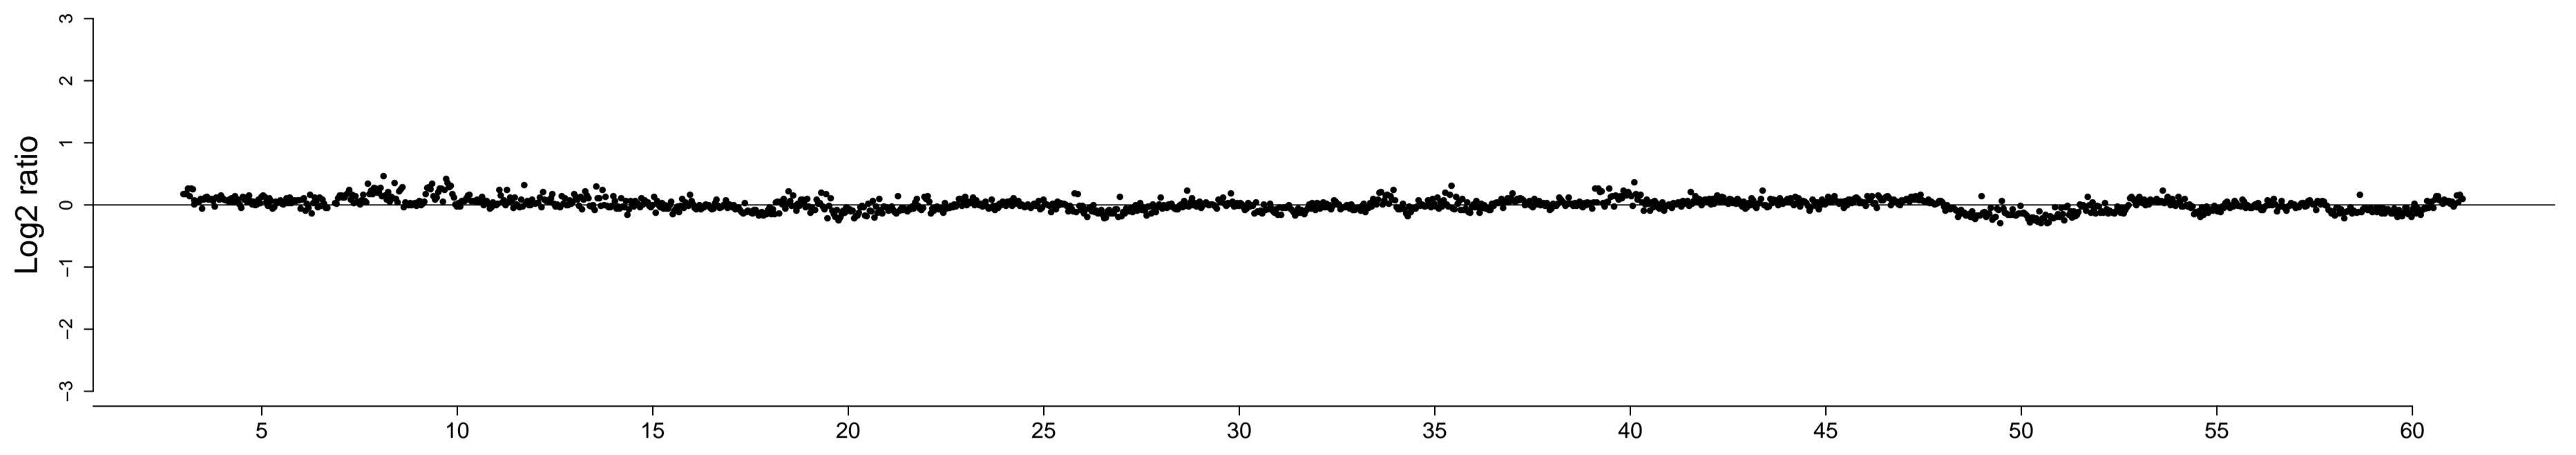

chr19:HAP2 p18

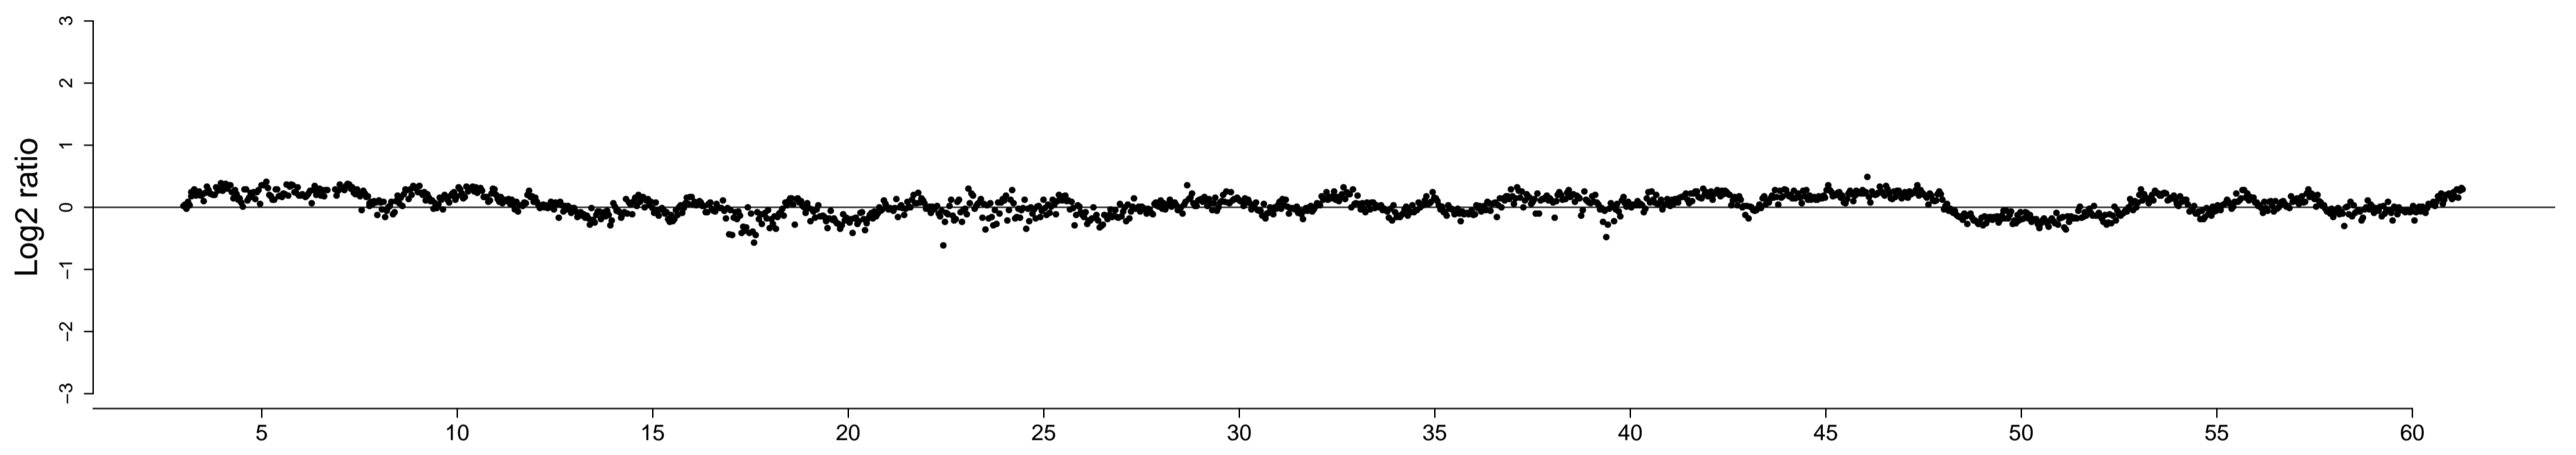

chr19:HTG\_control male kidney

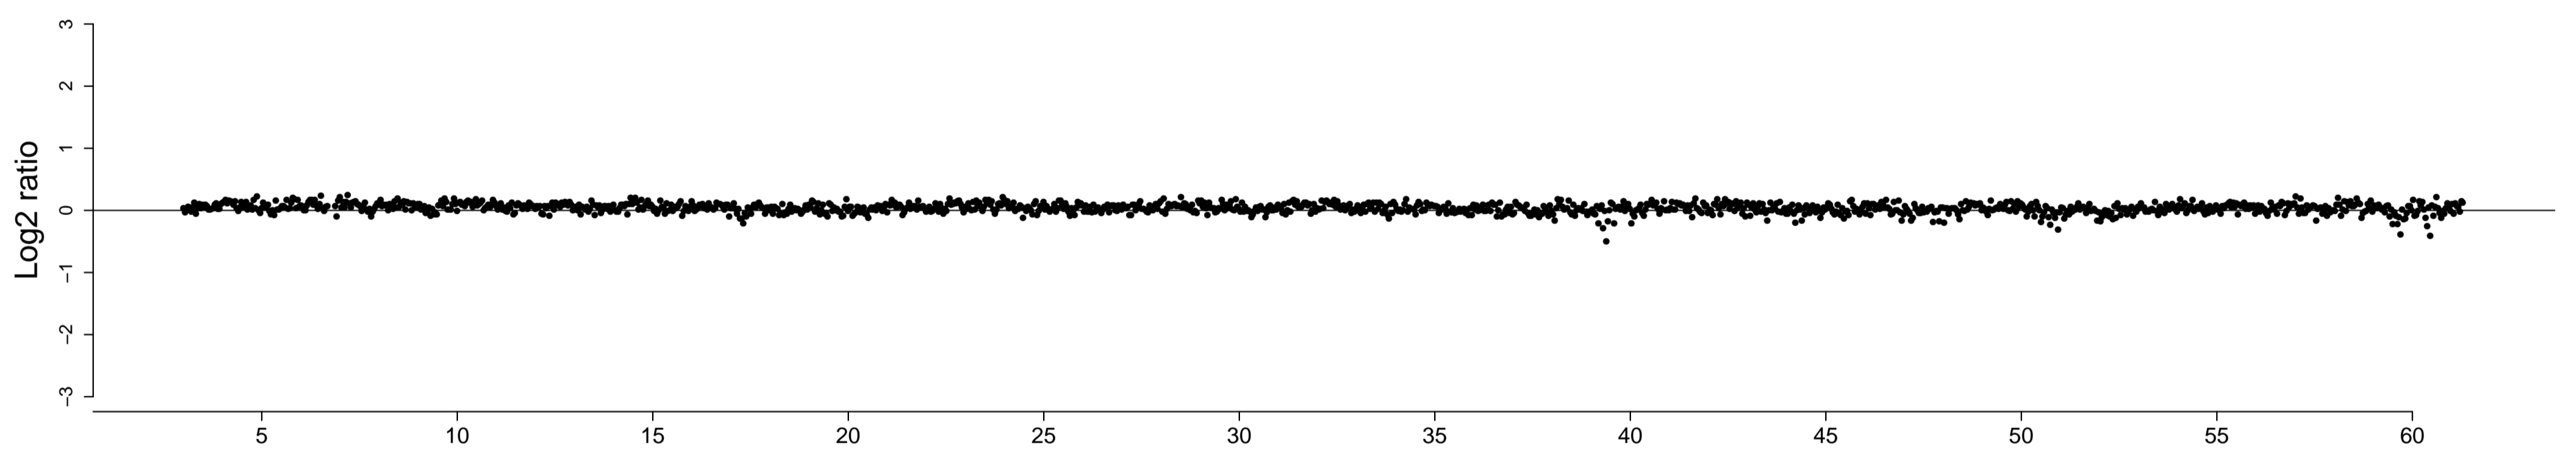

chr19:HTG1 p11

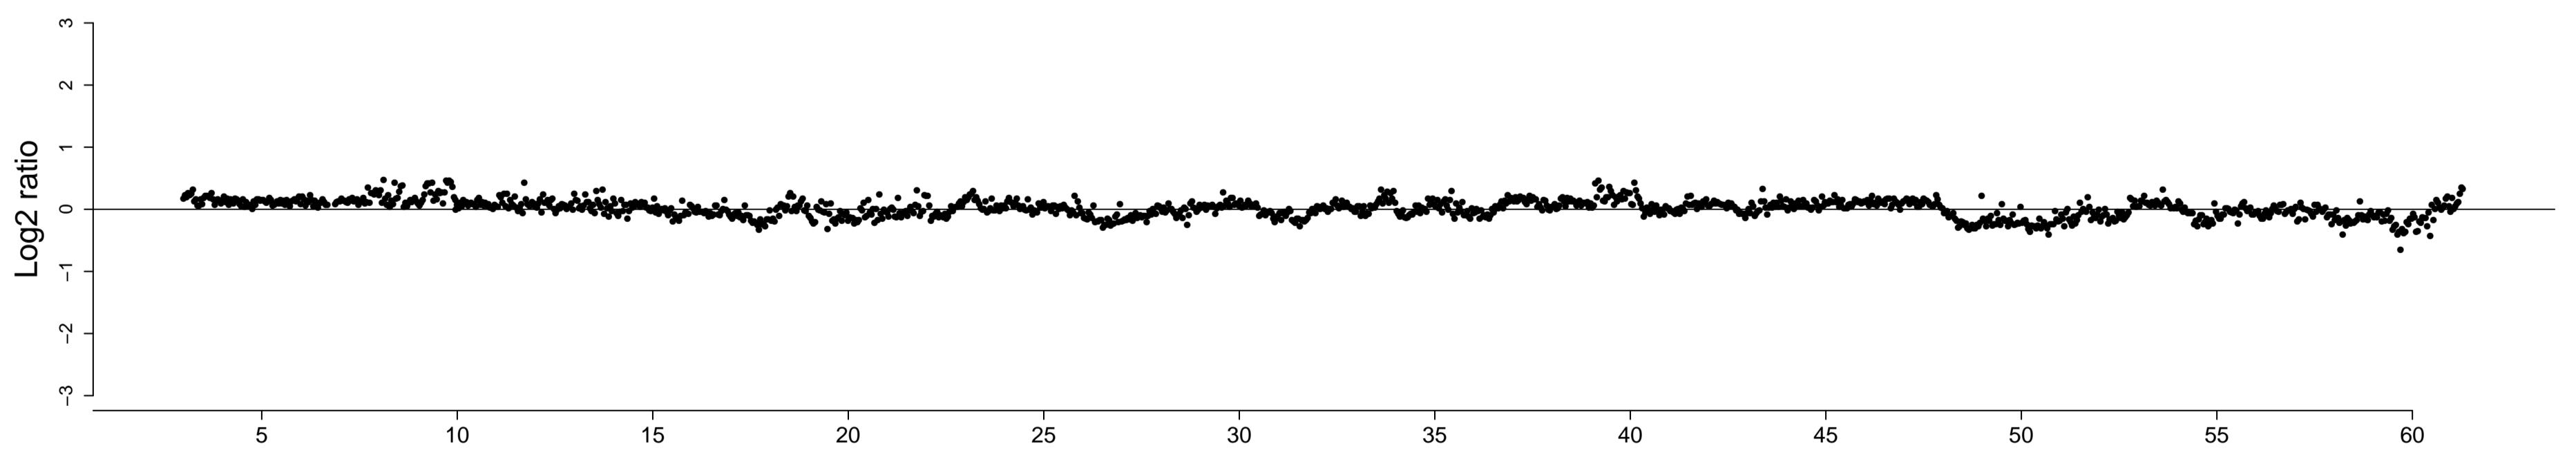

chr19:HTG2 p11

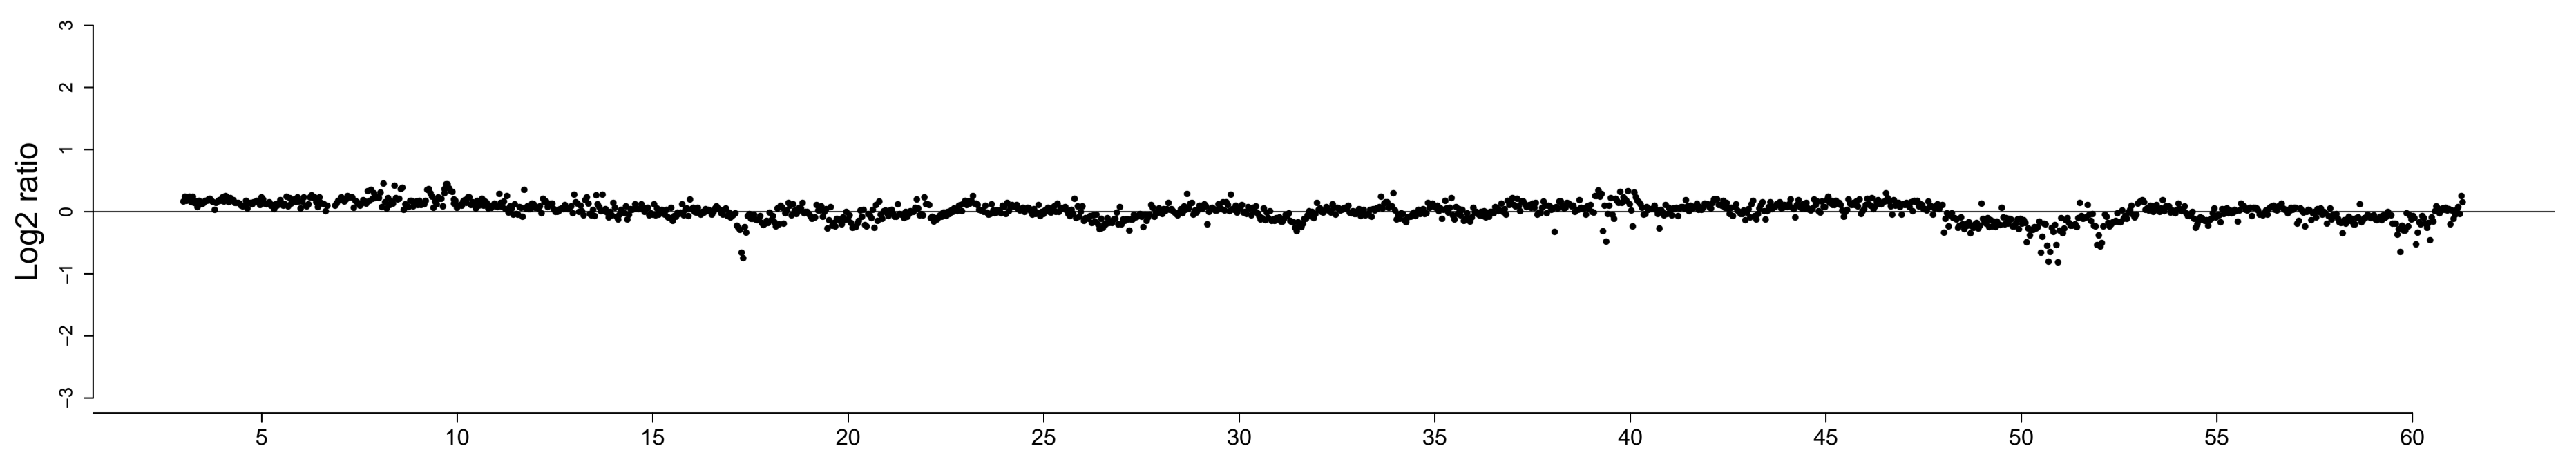

chrX:CBA control kidney

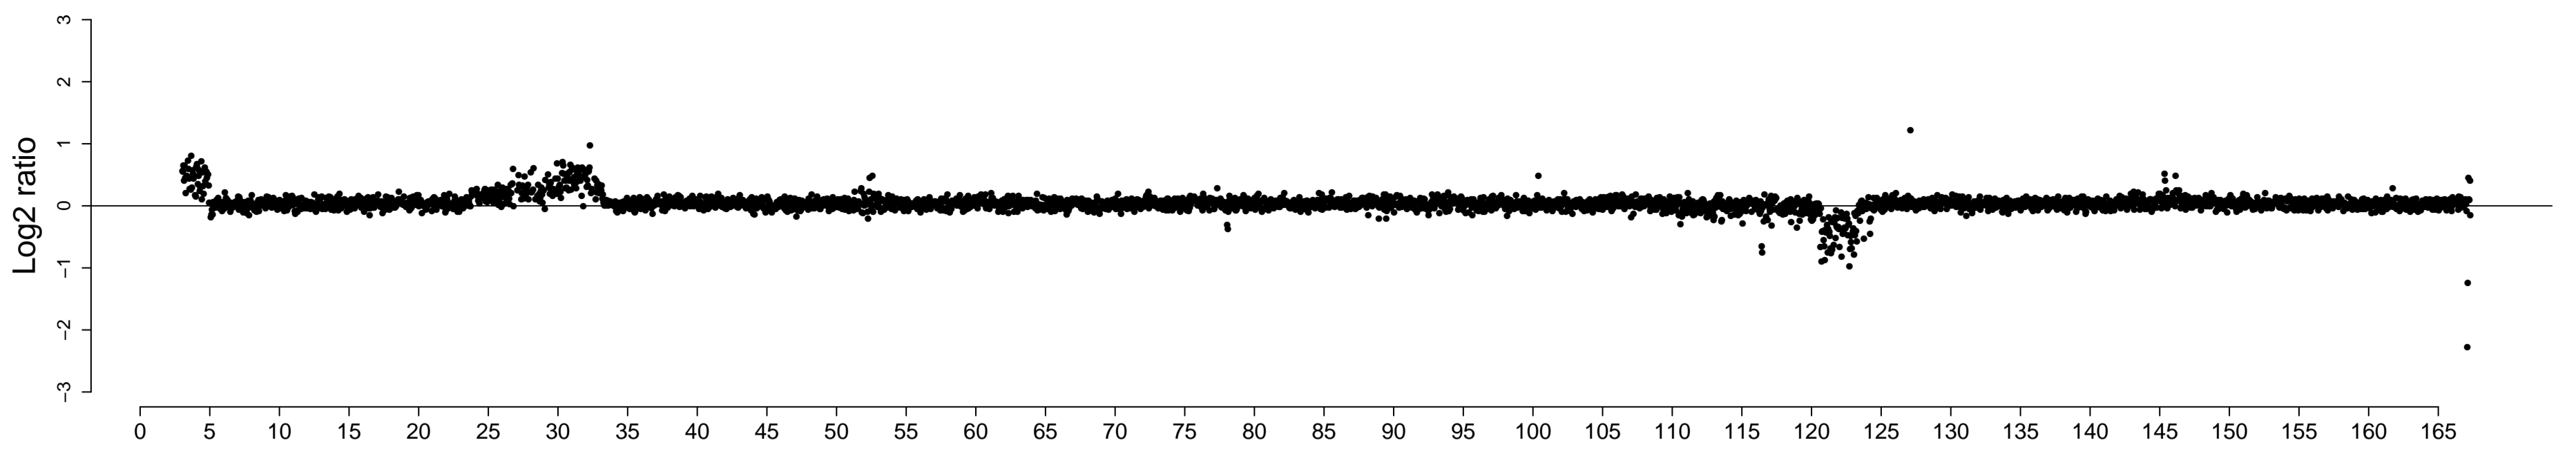

chrX:HAP1 p25

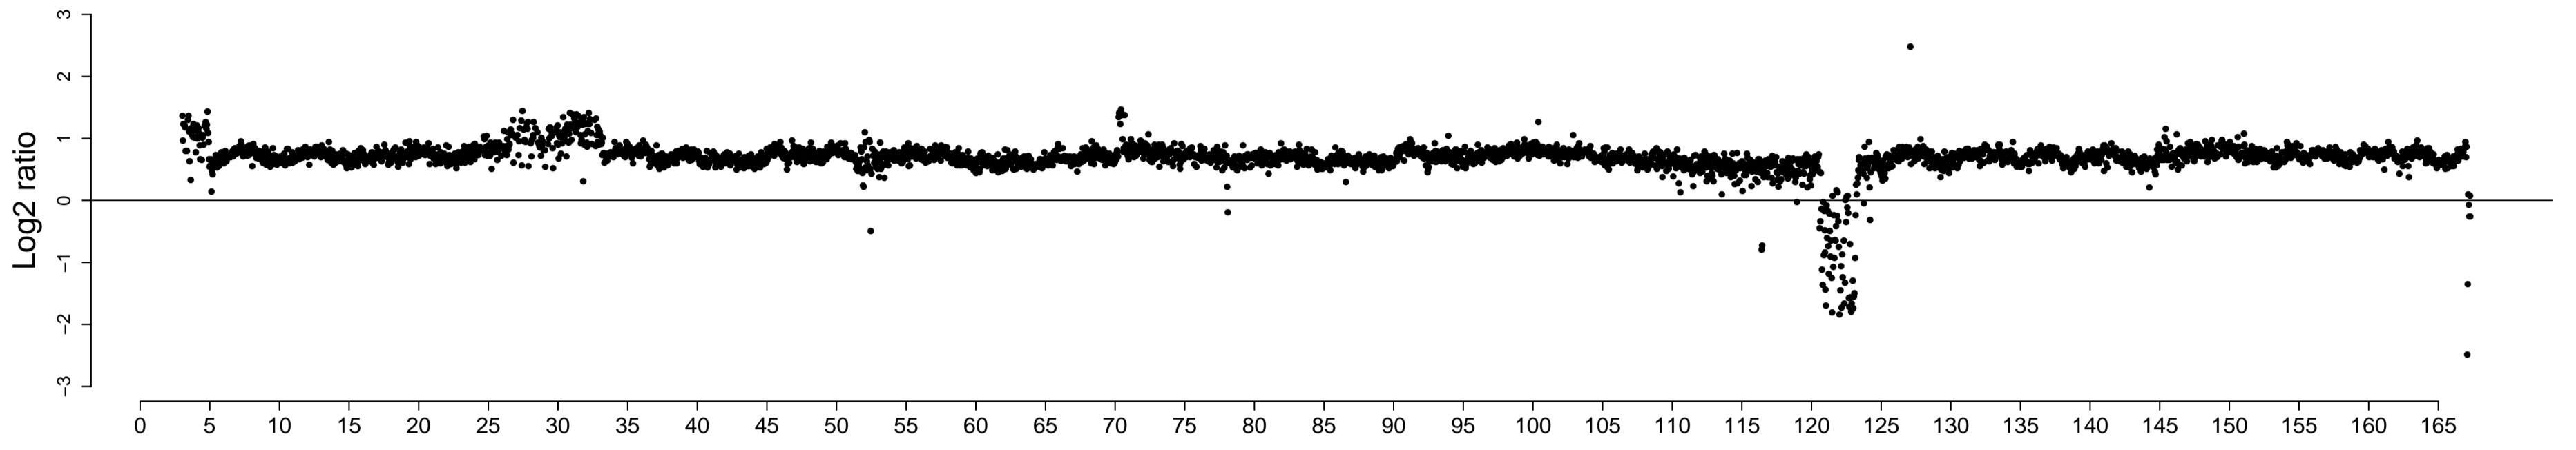

chrX:HAP2 p18

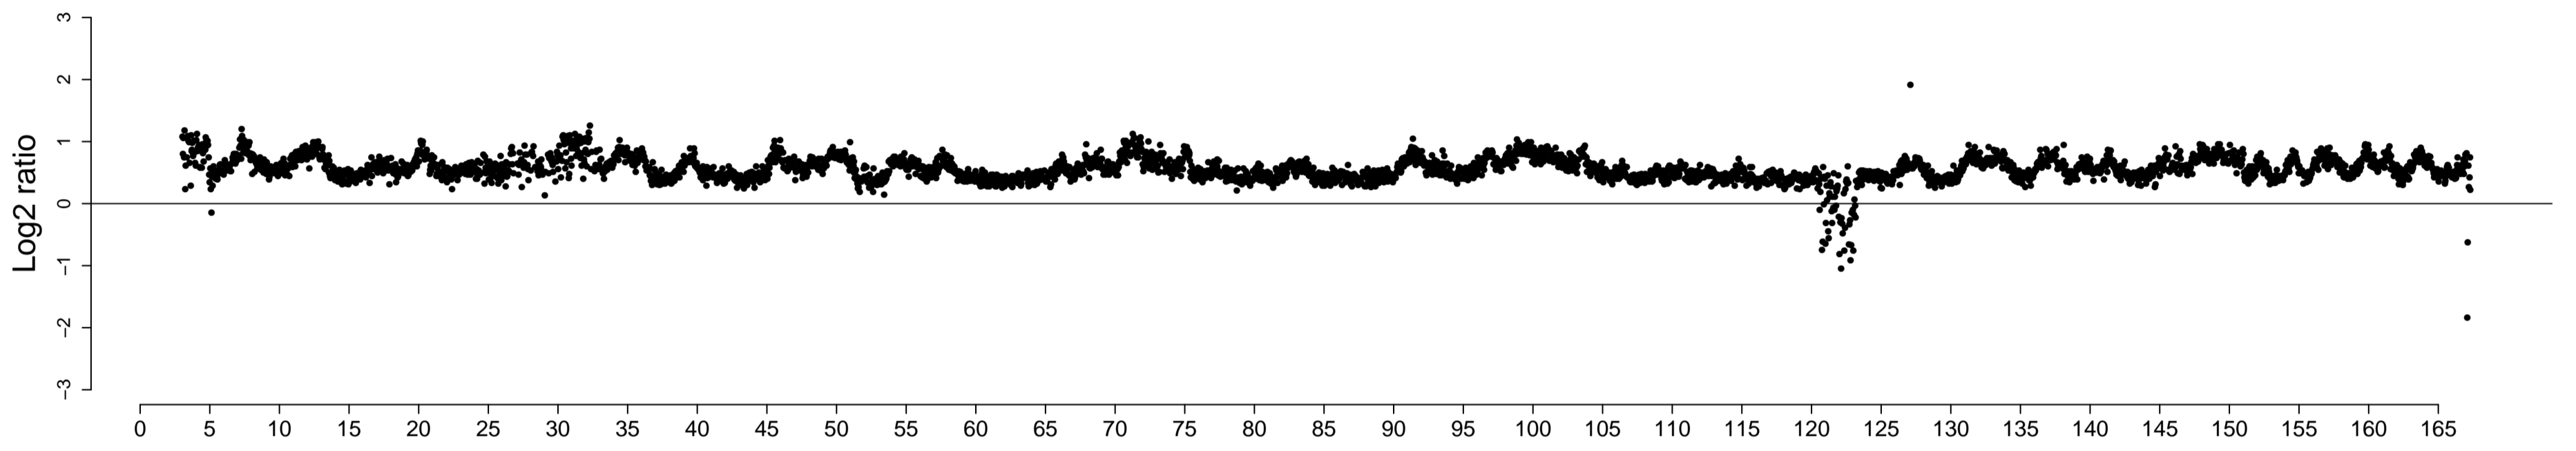

chrX:HTG\_control male kidney

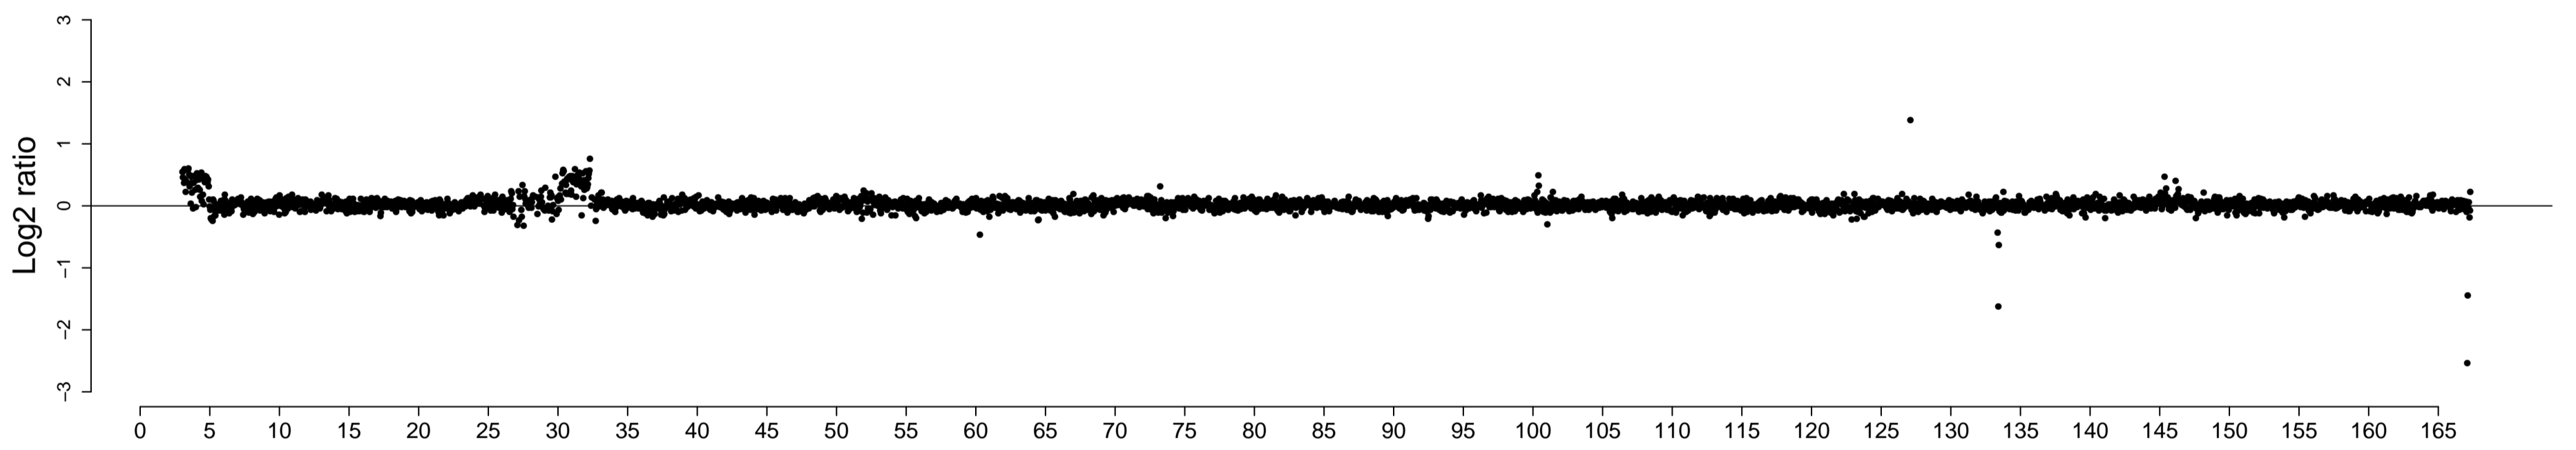

chrX:HTG1 p11

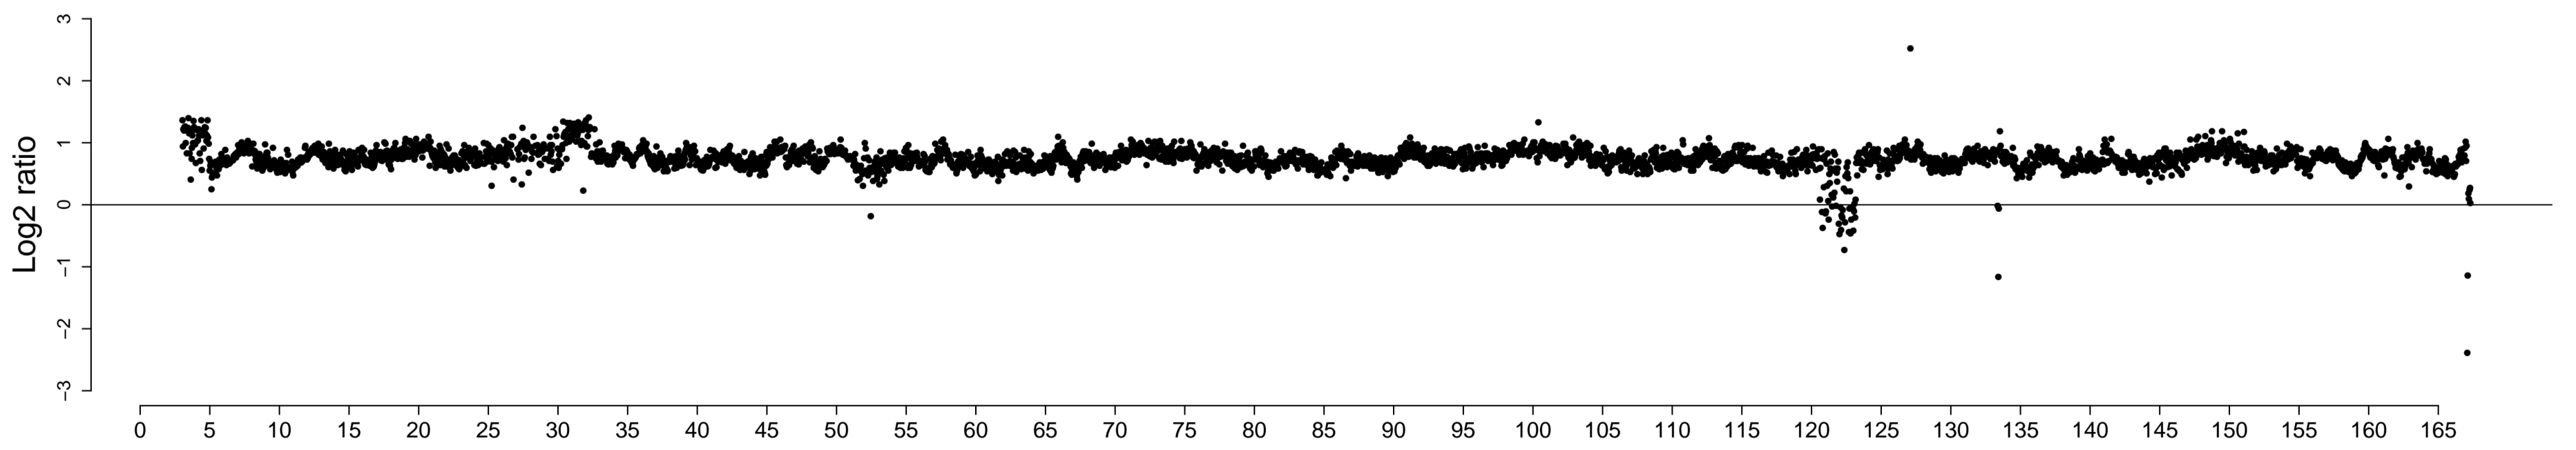

chrX:HTG2 p11

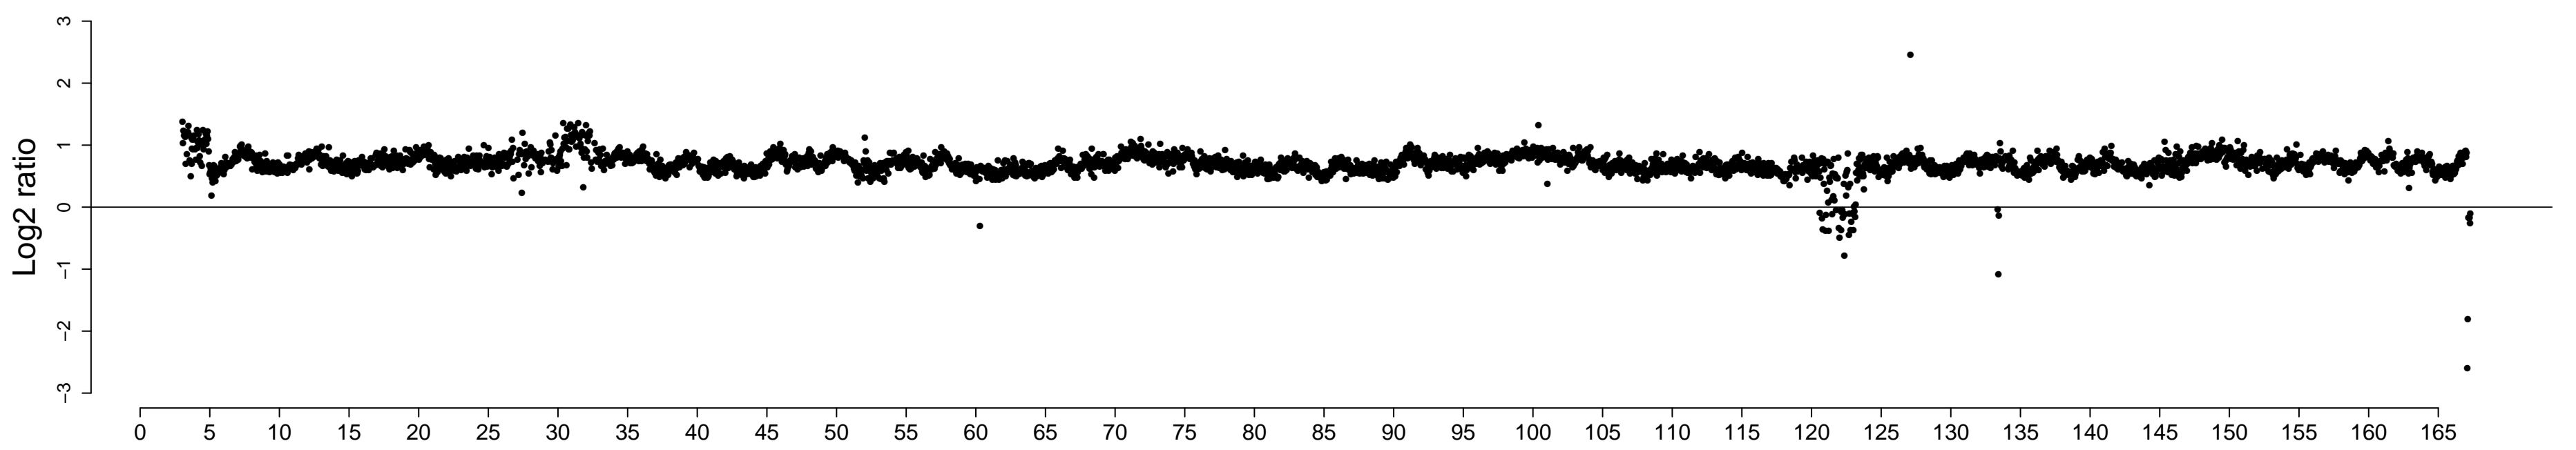



chrY:CBA control kidney

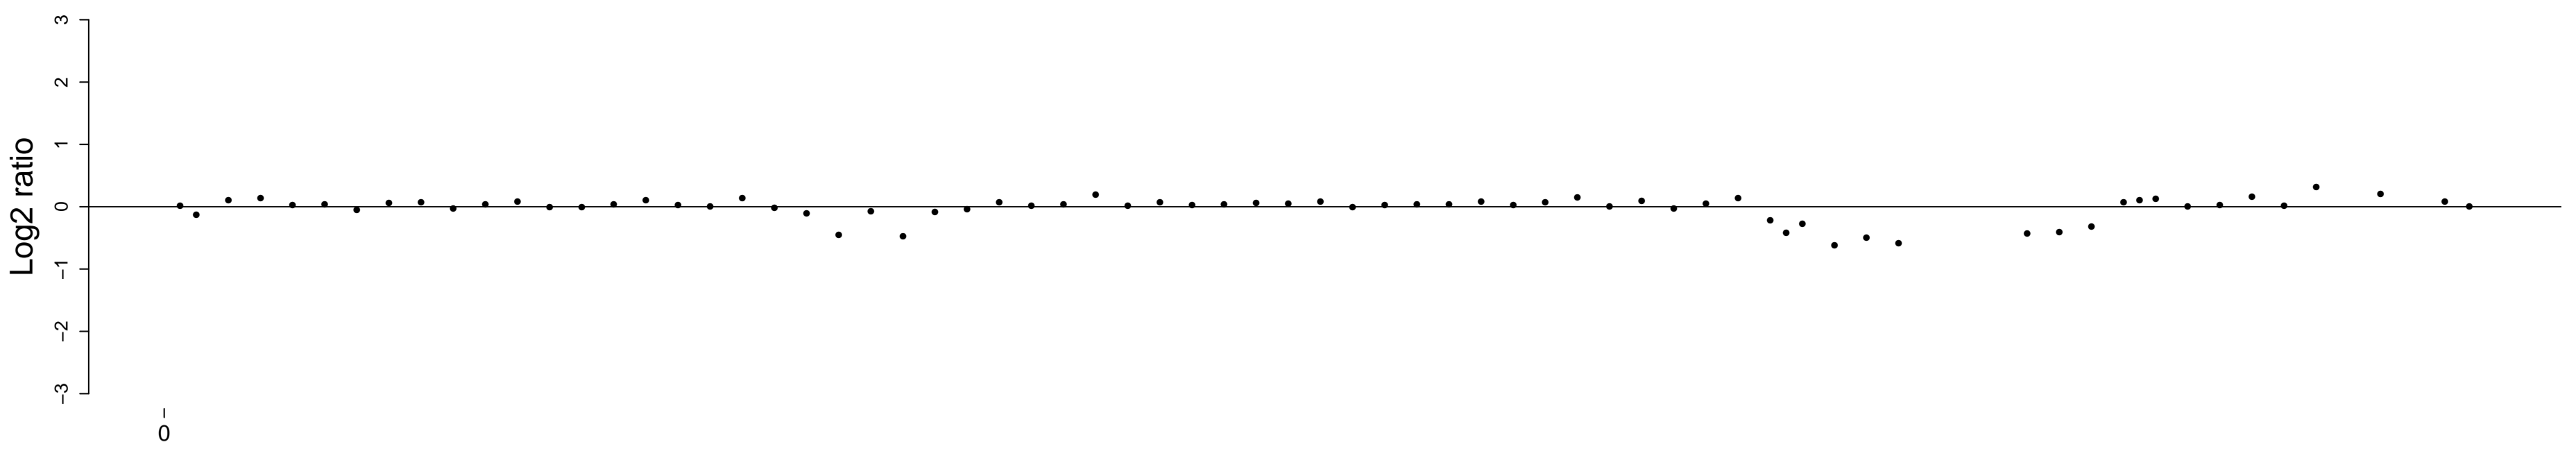

chrY:HAP1 p25

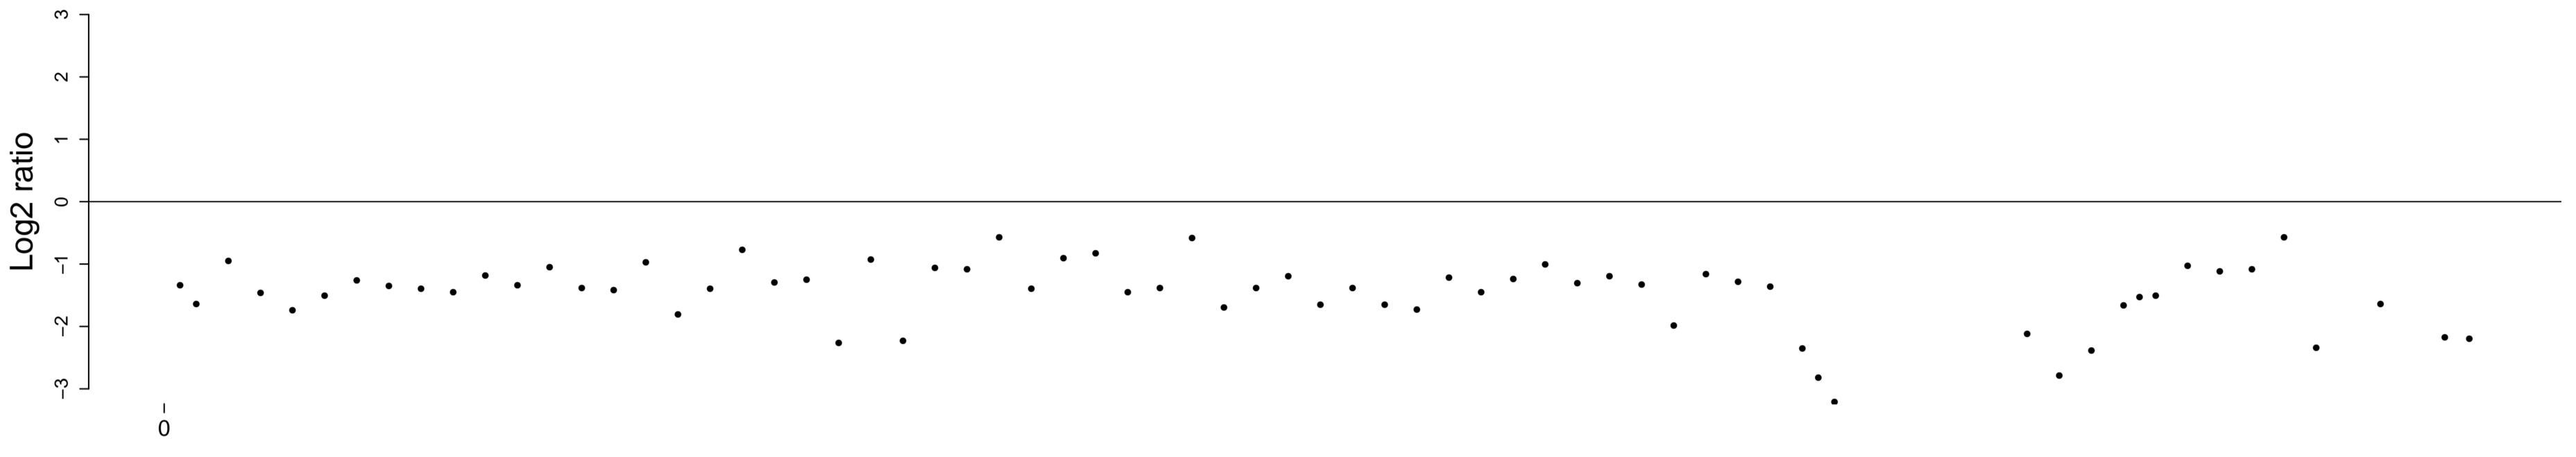

chrY:HAP2 p18

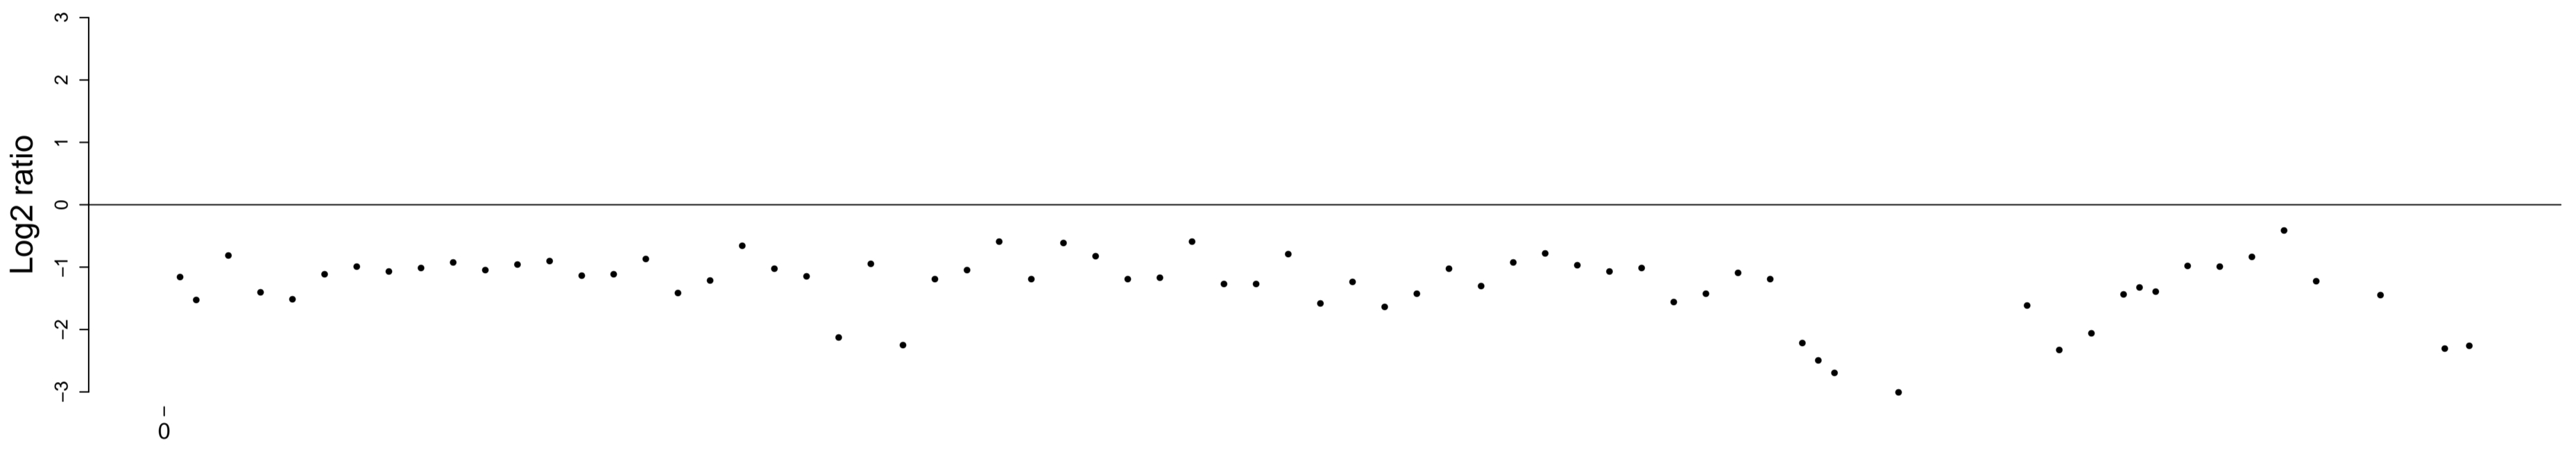

chrY:HTG\_control male kidney

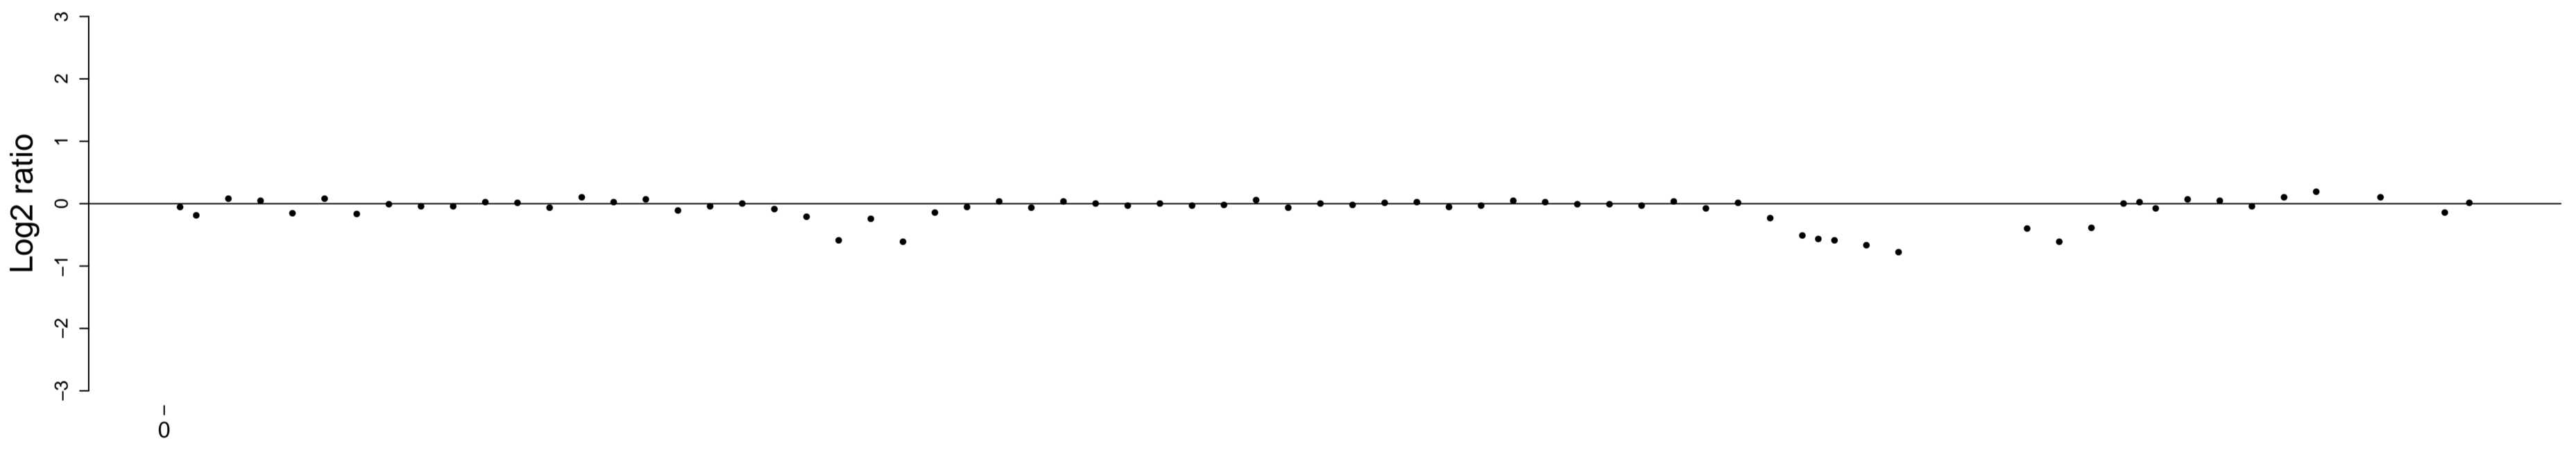

chrY:HTG1 p11

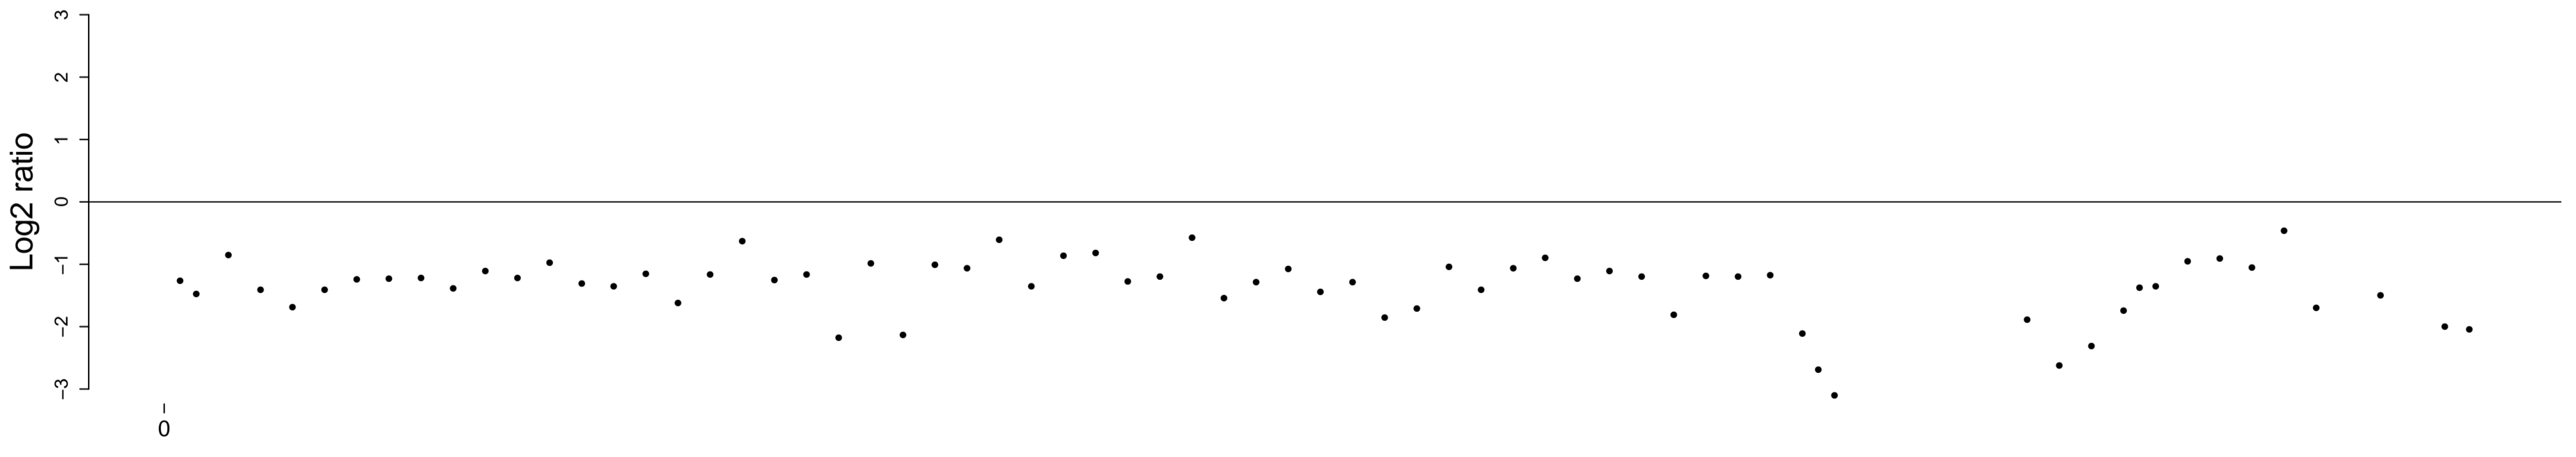

chrY:HTG2 p11

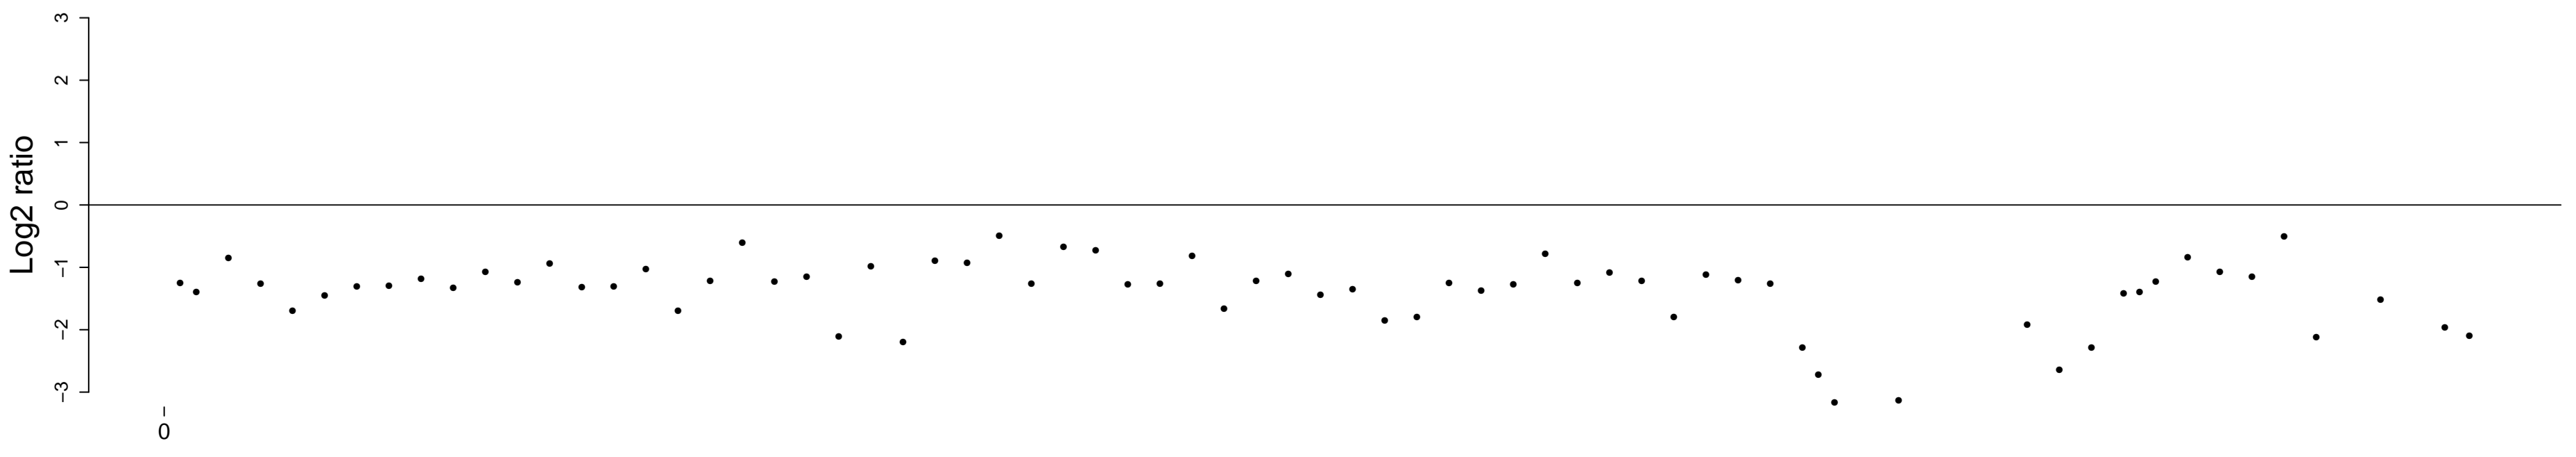

chrY\_random:CBA control kidney

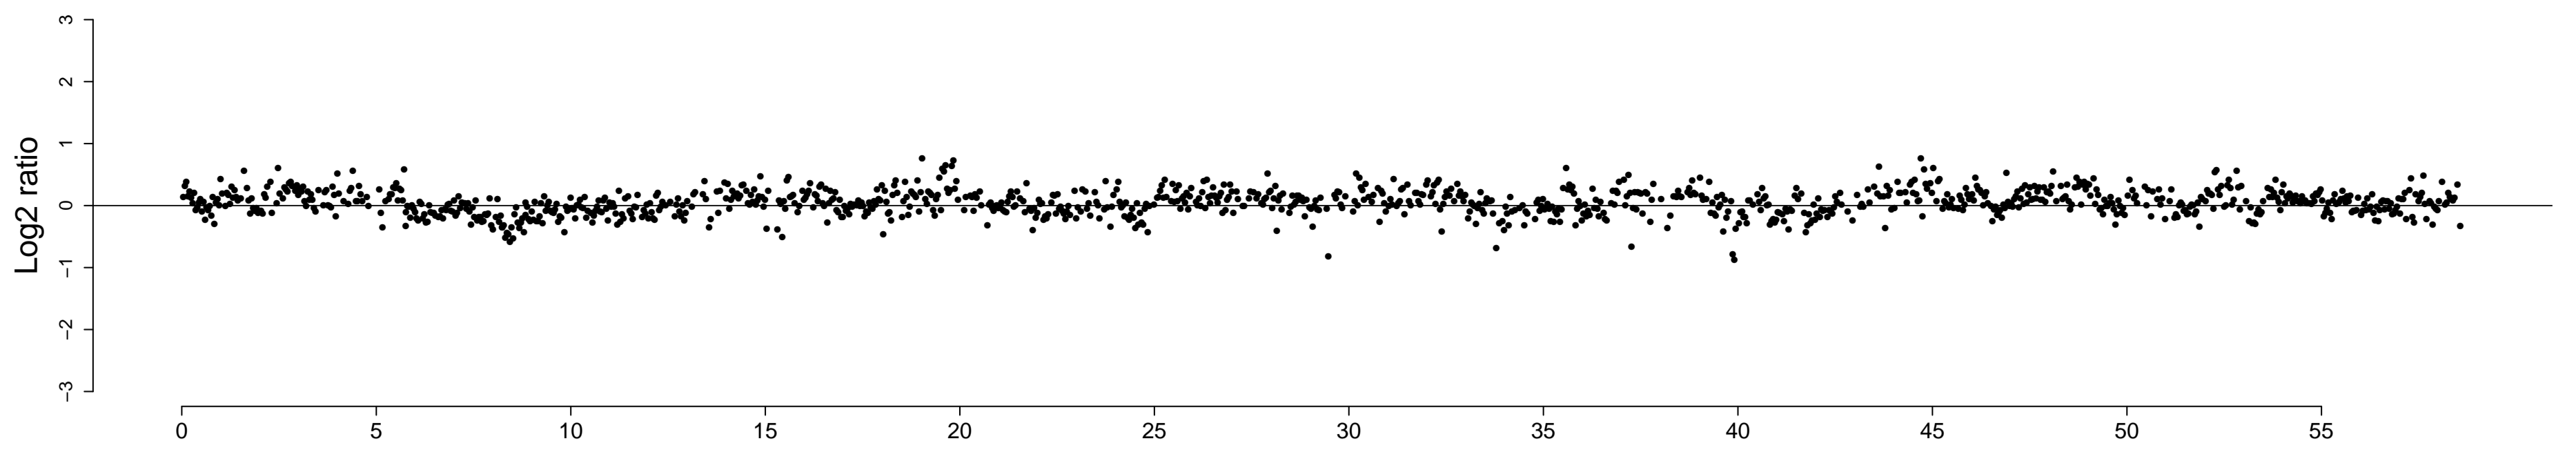

chrY\_random:HAP1 p25

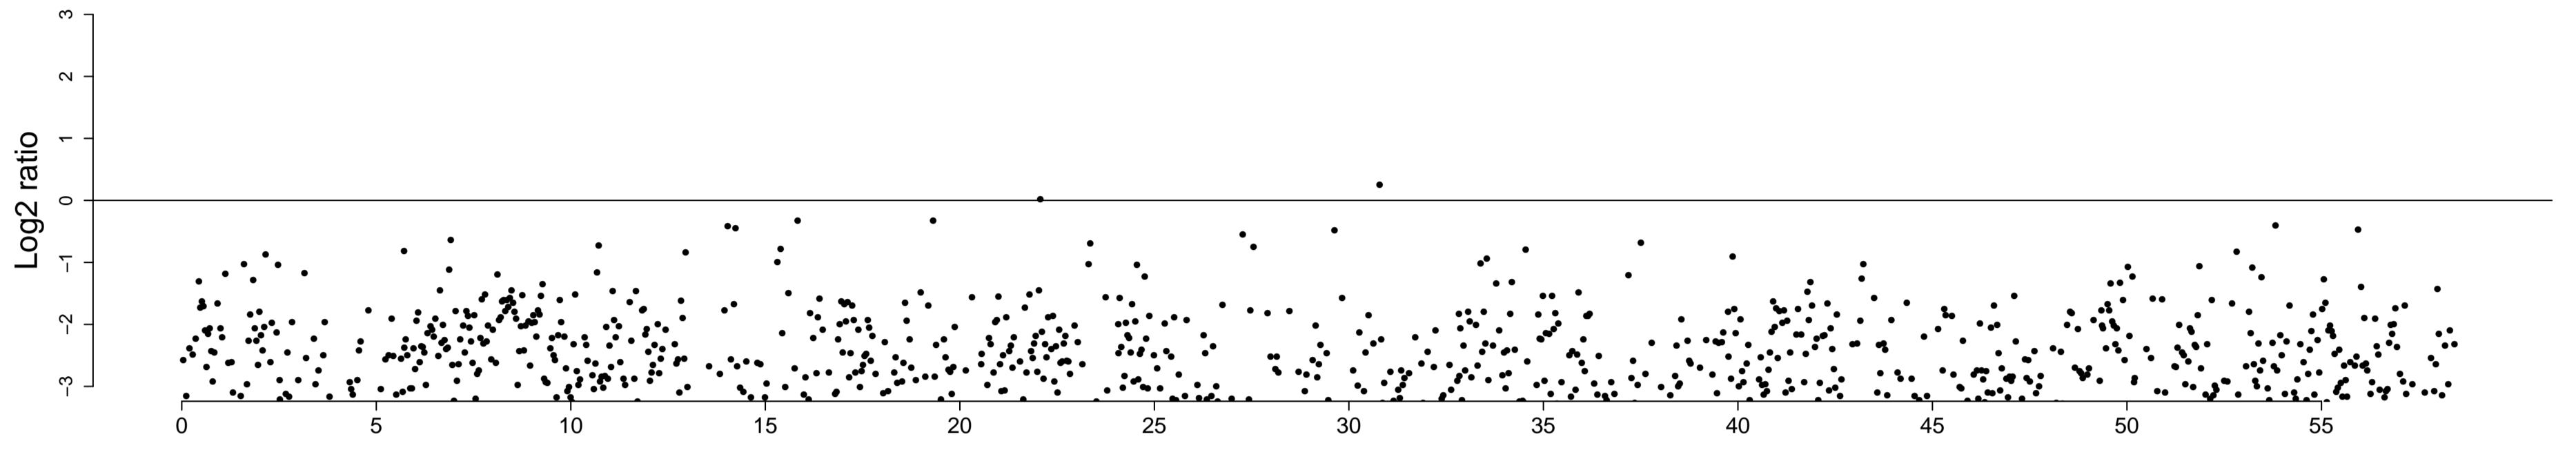

chrY\_random:HAP2 p18

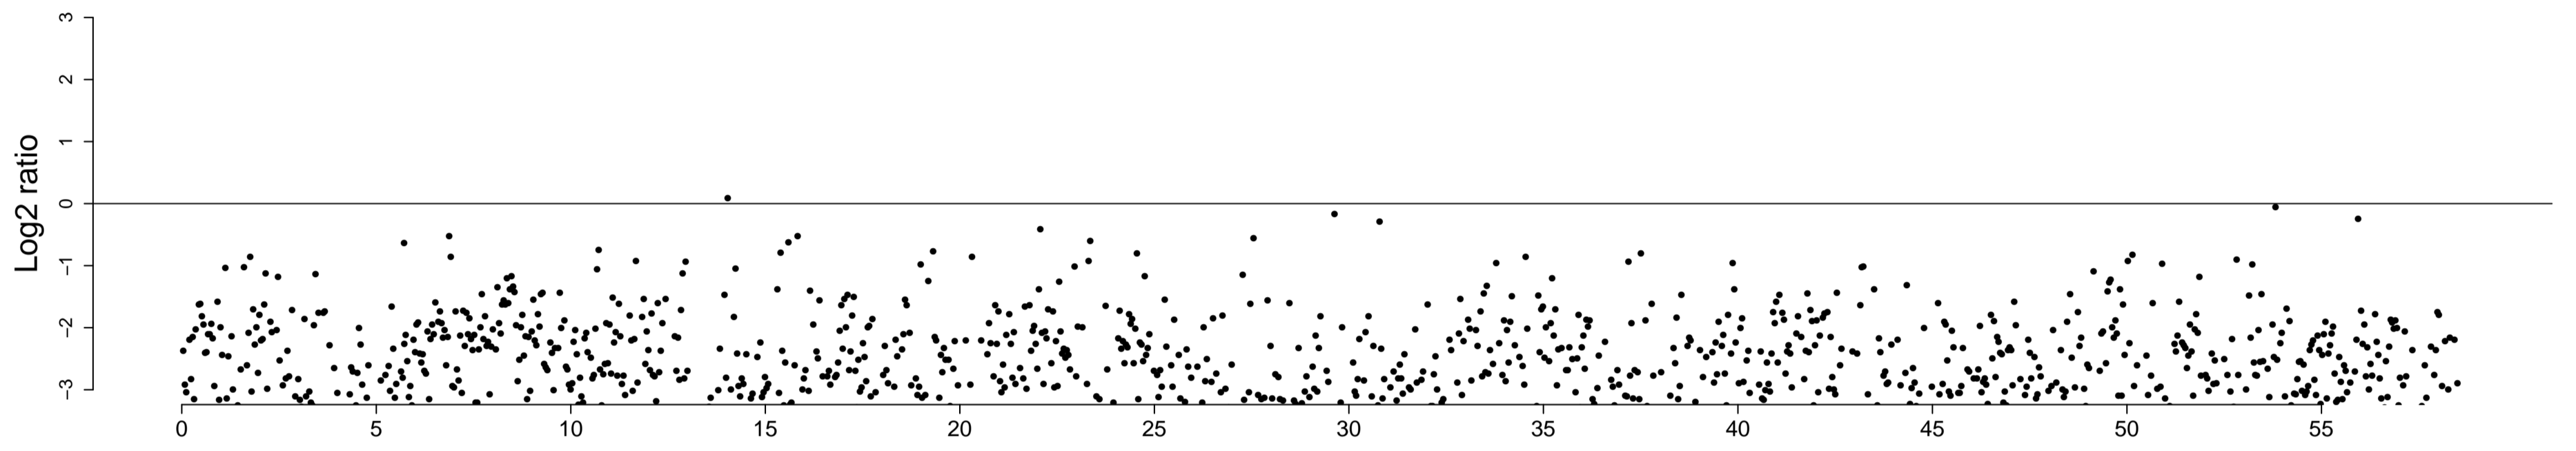

chrY\_random:HTG\_control male kidney

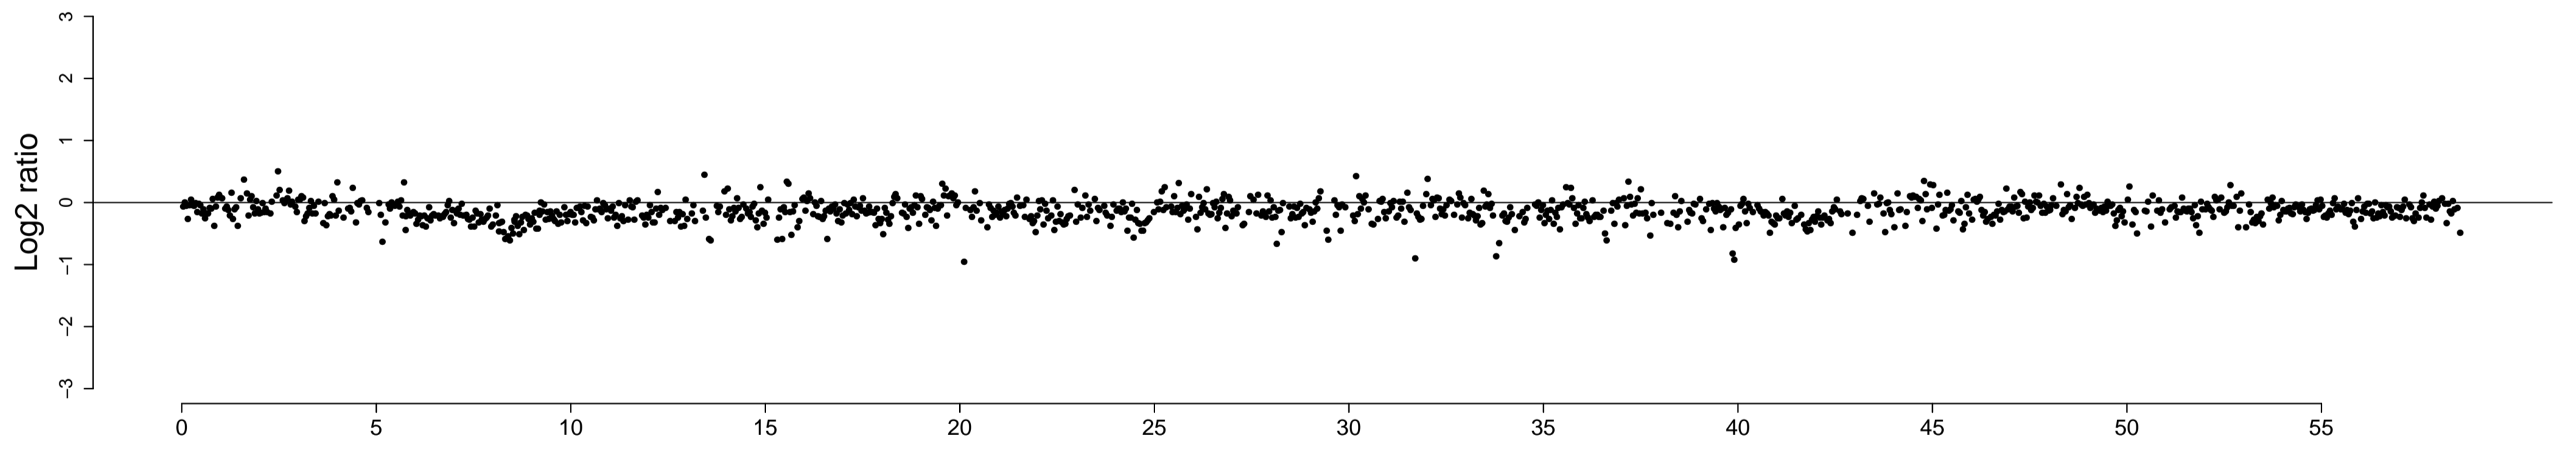

chrY\_random:HTG1 p11

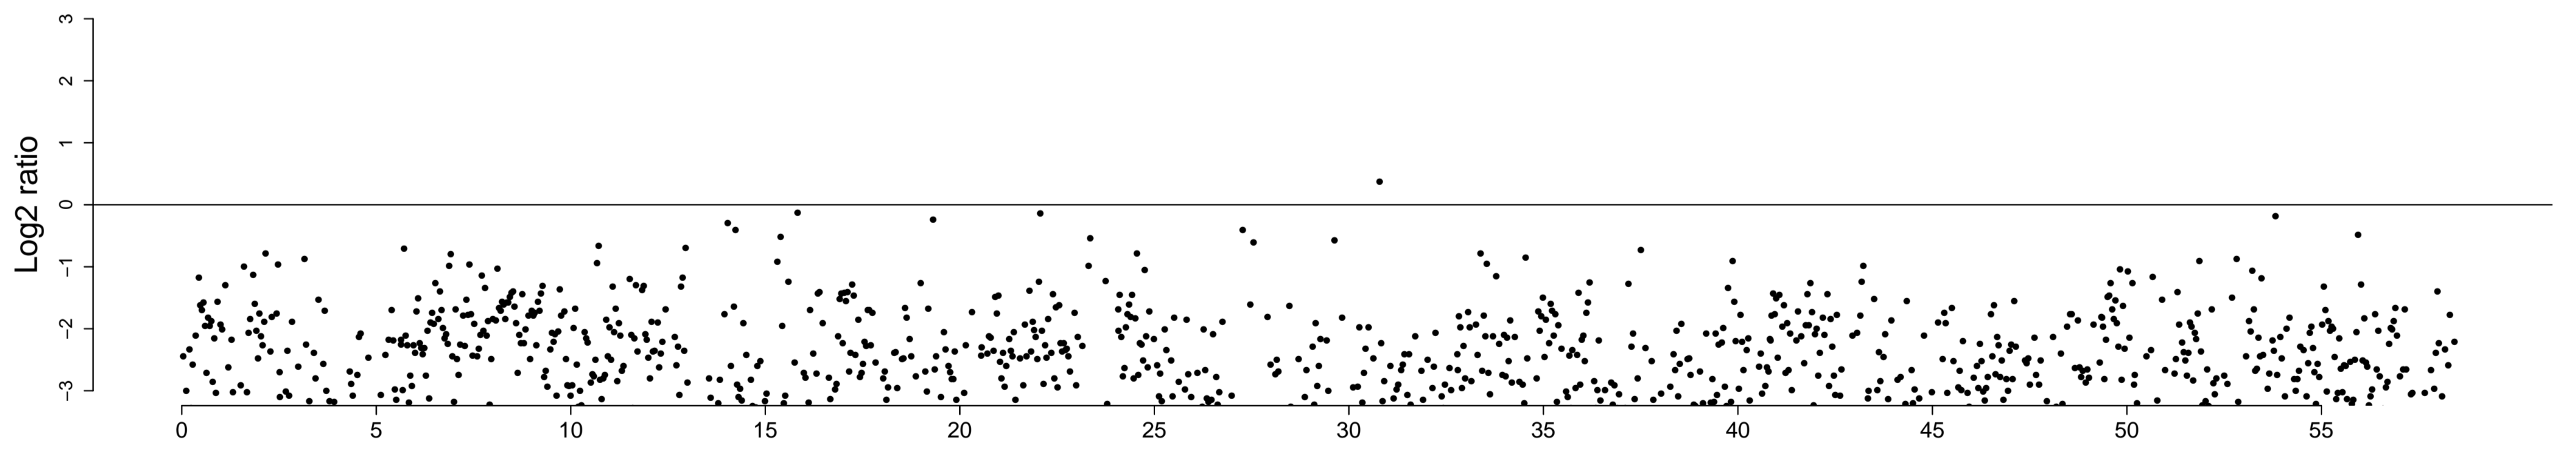

chrY\_random:HTG2 p11

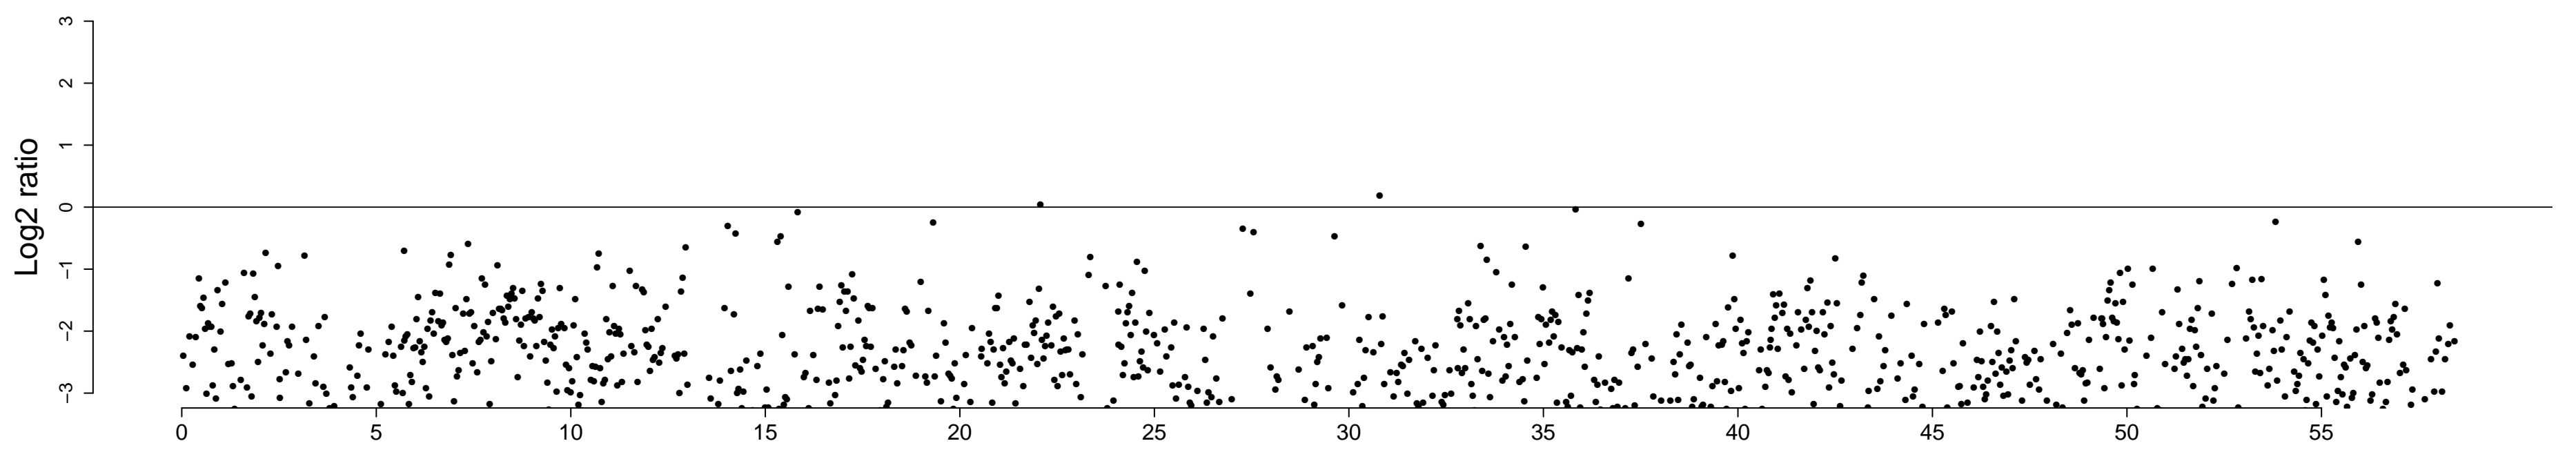

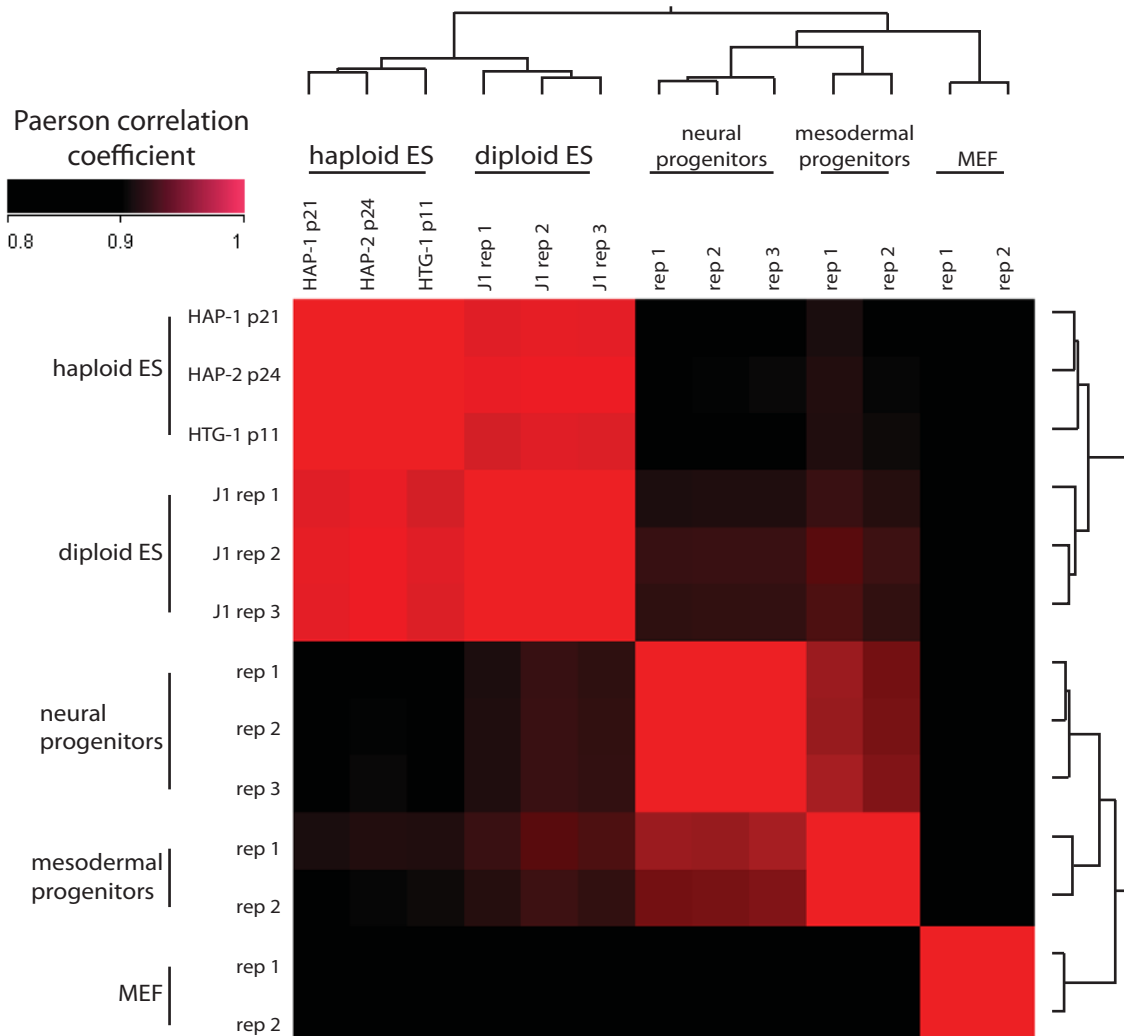

### Supplementary Figure 5 - Analysis of similarity between haploid and diploid ES cells

An overview of the gene expression profiles of haploid and diploid ES cells is shown. Gene expression profiles were clustered using all genes and the Paerson correlation coefficient was calculated (indicated by red color). Three different haploid ES cell lines (HAP-1, HAP-2, and HTG-1) cluster together showing highly similar expression profiles. Gene expression of haploiid ES cells is highly similar to control diploid J1 ES cells but different from mouse embryonic fibroblasts (MEF) or neural and mesodermal progenitors. The dendrogram (top and right) was generated by hierarchical clustering by Euclidean distance and complete linkage analysis (rep1, rep2, rep3 indicate biological replicates).

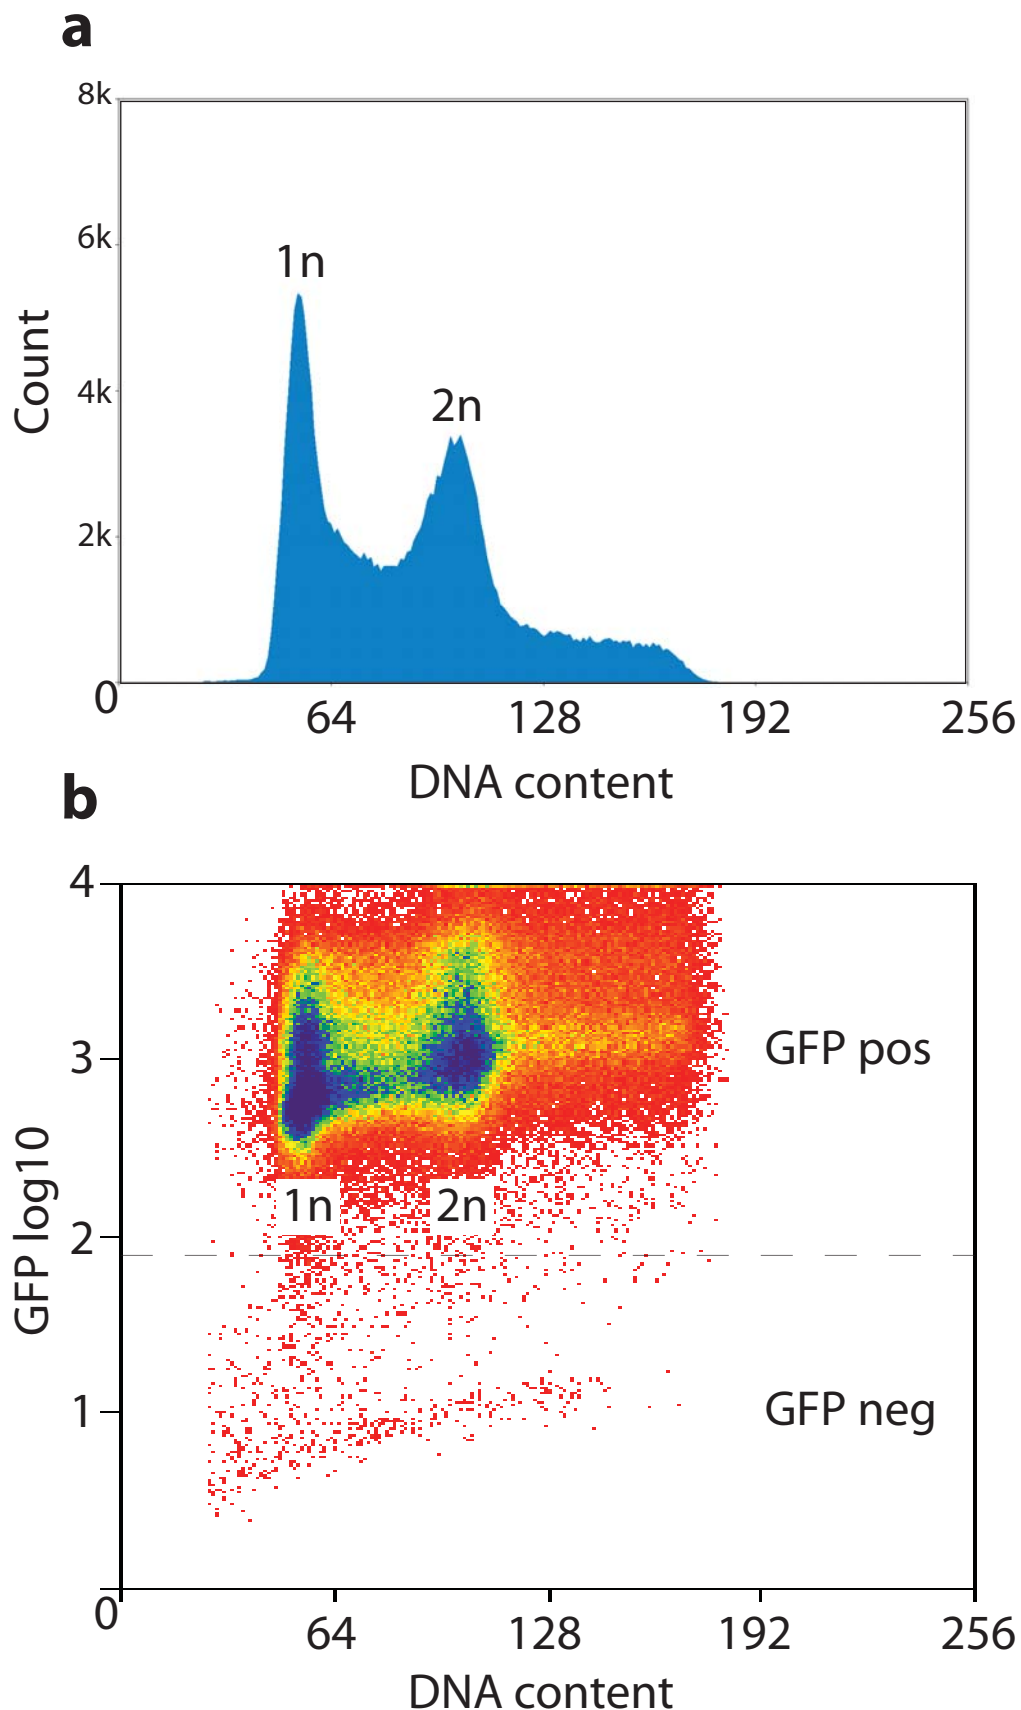

**Supplementary Figure 6 - Stable integration of a GFP transgene into haploid ES cells**

Flow profiles show the **(a)** DNA content and **(b)** DNA content combined with GFP intensity of HAP-2 ES cells transfected with a piggyBac vector for expressing GFP. The 1n / GFP positive population was purified for analysis of the developmental potential of haploid ES cells.

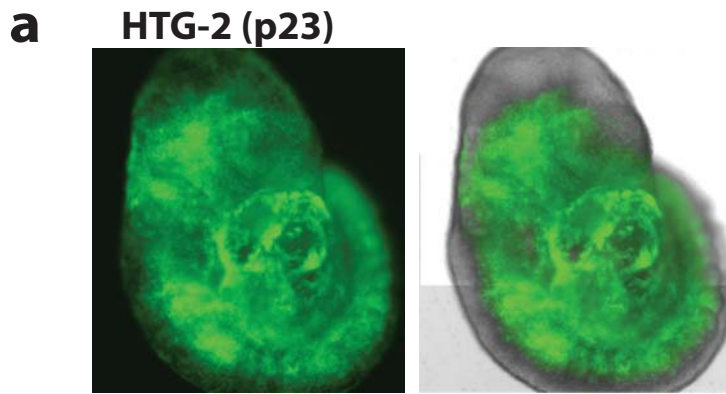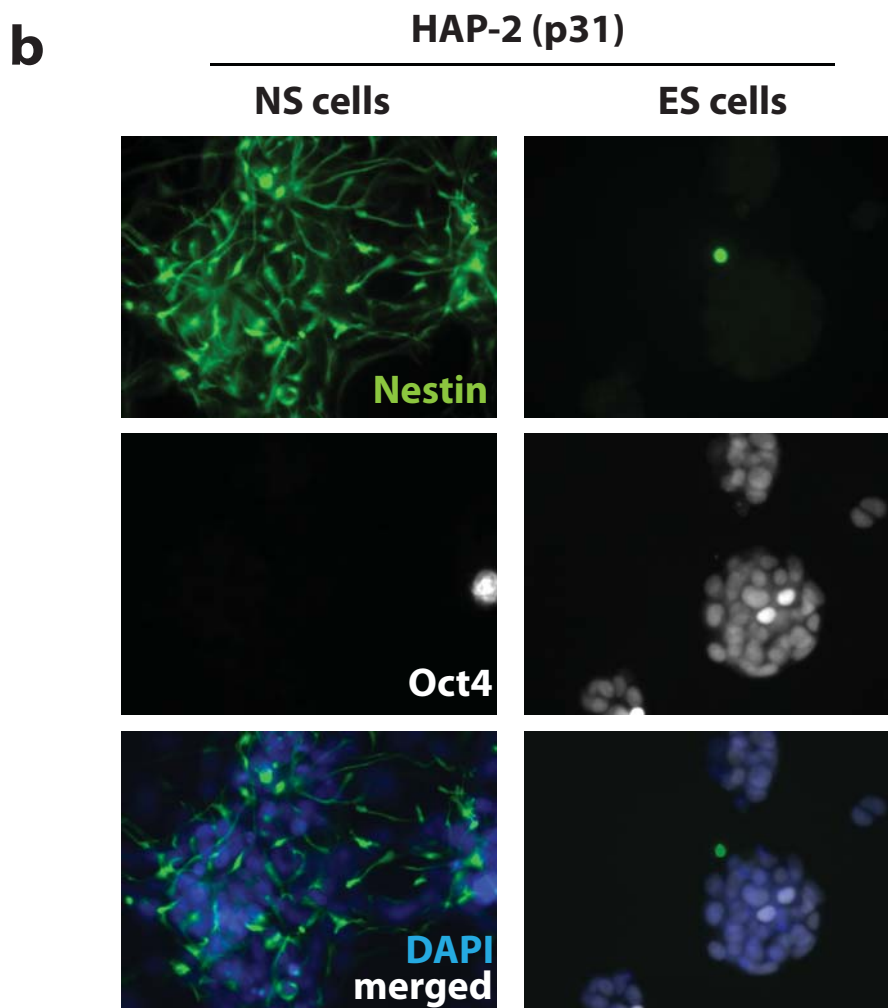

### Supplementary Figure 7 - Developmental potential of haploid ES cells.

(a) A GFP image and merged GFP brightfield image of a chimeric E9.5 embryo from injection of GFP labeled HTG-2 ES cells (p23) into C57BL6 host blastocysts.

(b) Immunofluorescence analysis of Nestin (green) and Oct4 (white) expression in HAP-2 (p31) ES cells and HAP-2 derived neural stem (NS) cells. A merged image with DNA stained with DAPI (blue) is shown below.

**a**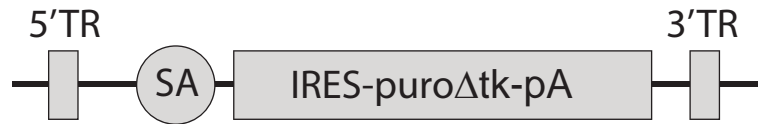**b**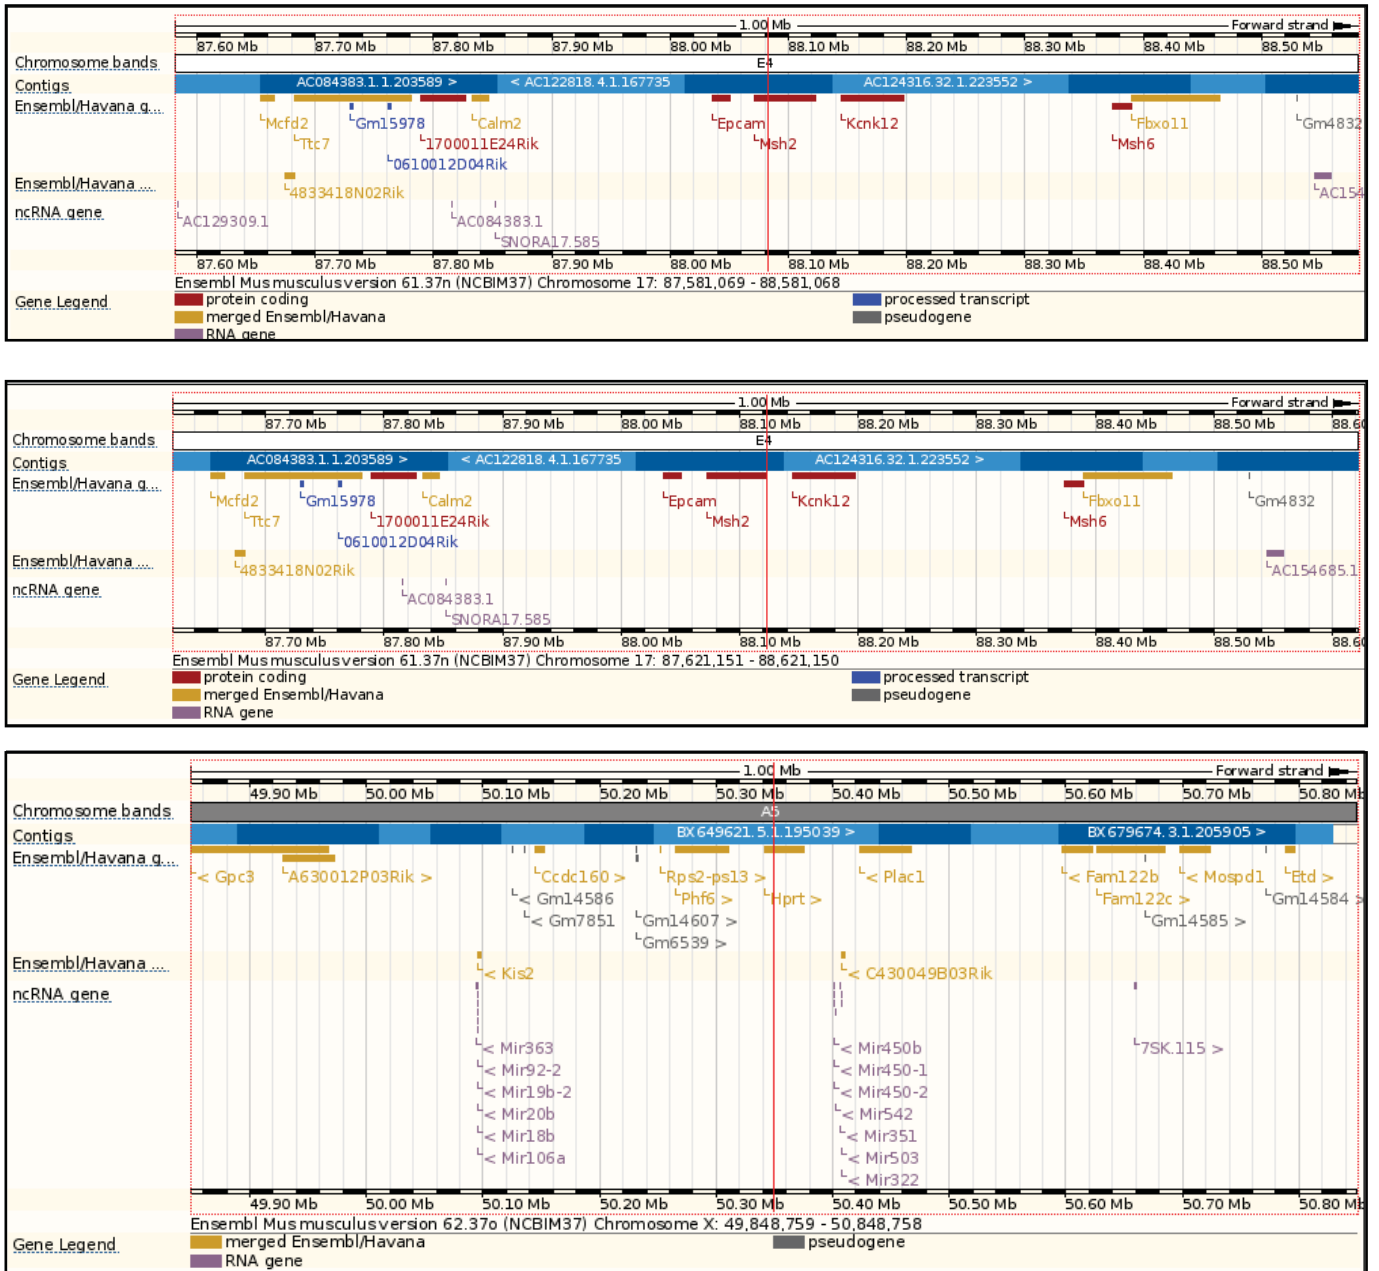

## Supplementary Figure 8 - Genetrapp insertions recovered in mismatch repair screen

**(a)** A schematic representation of the piggyBac genetrapp vector is shown (SA, splice acceptor).

**(b)** Genome browser view shows BLAST hits for sequences recovered by Splinkerette PCR from 6-TG resistant clones obtained from a mismatch repair screen using haploid mouse ES cells (see text). Seven clones were analysed and three insertions into genes previously identified to mediate 6-TG sensitivity were identified. Two independent insertions in the *Msh2* and one insertion in the *Hprt* gene are shown. The integration sites were mapped to intron three and fifteen of *Msh2* on chromosome 17 at base position 88,081,425 and 88,121,546, respectively. A further insertion was identified in intron 1 of the *Hprt* gene at base position 50,349,004 on the X chromosome. All gene trap insertions were in forward orientation trapping the gene transcripts as expected. Genomic positions and gene structure are based on the NCBI37/mm9 assembly of the mouse genome.

**Supplementary Table 1 - Segmentation table of the CGH analysis of haploid ES cells**

Segmentation analysis of the CGH profiles of HAP-1, HAP-2, HTG-1 and HTG-2 haploid mouse ES cells and CBA and HTG control male somatic samples was performed using the NimbleScan software (Roche). Copynumber deviations with a cut-off log<sub>2</sub> value of 0.8 were determined and listed with chromosome and genomic position.





Supplementary Table 2 - differentially regulated genes in haploid ES cells (&gt; 2 fold; p&lt;0.05)

## Upregulated genes in haploid vs diploid ES cells

| Probe Set ID    | Fold change | Gene Symbol        | Entrez Gene           | Gene Description                                                                |
|-----------------|-------------|--------------------|-----------------------|---------------------------------------------------------------------------------|
| 1 1434068_s_at  | 11.99       | Al662270           | 103814                | expressed sequence Al662270                                                     |
| 2 1416749_at    | 10.76       | Htra1              | 56213                 | HtrA serine peptidase 1                                                         |
| 3 1419540_at    | 8.46        | EG434726 /// Fth17 | 434726 /// 434727 /// | predicted gene 14458                                                            |
| 4 1460670_at    | 8.39        | Riok3              | 66878                 | RIO kinase 3 (yeast)                                                            |
| 5 1419134_at    | 7.66        | Rhbg               | 58176                 | Rhesus blood group-associated B glycoprotein                                    |
| 6 1436107_at    | 7.51        | Lsm8               | 76522                 | LSM8 homolog, U6 small nuclear RNA associated (S. cerevisiae)                   |
| 7 1427512_a_at  | 7.47        | Lama3              | 16774                 | laminin, alpha 3                                                                |
| 8 1450001_a_at  | 7.34        | Ush1c              | 72088                 | Usher syndrome 1C homolog (human)                                               |
| 9 1456036_x_at  | 7.24        | Gsto1              | 14873                 | glutathione S-transferase omega 1                                               |
| 10 1454799_at   | 7.01        | Agpat9             | 231510                | 1-acylglycerol-3-phosphate O-acyltransferase 9                                  |
| 11 1424692_at   | 6.90        | 2810055F11Rik      | 67217                 | RIKEN cDNA 2810055F11 gene                                                      |
| 12 1436355_at   | 6.73        | Fads6              | 328035                | fatty acid desaturase domain family, member 6                                   |
| 13 1454869_at   | 6.60        | Wdr40b             | 245404                | WD repeat domain 40B                                                            |
| 14 1453977_at   | 6.54        | Exoc4              | 20336                 | exocyst complex component 4                                                     |
| 15 1437152_at   | 6.40        | Mex3b              | 108797                | mex3 homolog B (C. elegans)                                                     |
| 16 1454737_at   | 6.27        | Dusp9              | 75590                 | dual specificity phosphatase 9                                                  |
| 17 1437867_at   | 5.95        |                    |                       |                                                                                 |
| 18 1416531_at   | 5.83        | Gsto1              | 14873                 | glutathione S-transferase omega 1                                               |
| 19 1426988_at   | 5.80        | Klhdc5             | 232539                | kelch domain containing 5                                                       |
| 20 1450460_at   | 5.53        | Aqp3               | 11828                 | aquaporin 3                                                                     |
| 21 1422008_a_at | 5.53        | Aqp3               | 11828                 | aquaporin 3                                                                     |
| 22 1421385_a_at | 5.33        | Myo7a              | 17921                 | myosin VIIA                                                                     |
| 23 1445281_a_at | 5.28        | B230311B06Rik      | 381914                | RIKEN cDNA B230311B06 gene                                                      |
| 24 1444416_at   | 5.26        | Cenpa              | 12615                 | centromere protein A                                                            |
| 25 1429308_at   | 5.23        | Prdm16             | 70673                 | PR domain containing 16                                                         |
| 26 1433845_x_at | 5.15        | Dusp9              | 75590                 | dual specificity phosphatase 9                                                  |
| 27 1438251_x_at | 4.82        | Htra1              | 56213                 | HtrA serine peptidase 1                                                         |
| 28 1449031_at   | 4.79        | Cited1             | 12705                 | Cbp/p300-interacting transactivator with Glu/Asp-rich carboxy-terminal domain 1 |
| 29 1437409_s_at | 4.78        | Gpr126             | 215798                | G protein-coupled receptor 126                                                  |
| 30 1438238_at   | 4.72        | 2010315B03Rik      | 630836                | RIKEN cDNA 2010315B03 gene                                                      |
| 31 1426223_at   | 4.66        | Ttc39c             | 72747                 | tetratricopeptide repeat domain 39C                                             |
| 32 1435948_at   | 4.40        | Tmem181 /// Tmem   | 100040525 /// 77106   | transmembrane protein 181C, pseudogene                                          |
| 33 1448696_at   | 4.13        | Slc6a8             | 102857                | solute carrier family 6 (neurotransmitter transporter, creatine), member 8      |
| 34 1438842_at   | 4.09        | Mtch2              | 56428                 | mitochondrial carrier homolog 2 (C. elegans); predicted gene, 100039384; predi  |
| 35 1417120_at   | 4.08        | Miip               | 28010                 | migration and invasion inhibitory protein                                       |
| 36 1449036_at   | 4.05        | Rnf128             | 66889                 | ring finger protein 128                                                         |
| 37 1439422_a_at | 4.04        | Fam132a            | 67389                 | family with sequence similarity 132, member A                                   |
| 38 1429169_at   | 4.03        | Rbm3               | 19652                 | predicted gene 15453; RNA binding motif protein 3                               |
| 39 1424082_at   | 4.03        | Tbc1d13            | 70296                 | TBC1 domain family, member 13                                                   |
| 40 1429504_at   | 3.97        | Rnpc3              | 67225                 | RNA-binding region (RNP1, RRM) containing 3                                     |
| 41 1444226_at   | 3.78        | Foxo3              | 56484                 | forkhead box O3                                                                 |
| 42 1418681_at   | 3.75        | Alg13              | 67574                 | asparagine-linked glycosylation 13 homolog (S. cerevisiae)                      |
| 43 1451754_a_at | 3.71        | Wdr45              | 54636                 | WD repeat domain 45                                                             |
| 44 1433844_a_at | 3.60        | Dusp9              | 75590                 | dual specificity phosphatase 9                                                  |
| 45 1456804_at   | 3.57        | EG627821           | 627821                | predicted gene 6792                                                             |
| 46 1437302_at   | 3.56        | Adrb2              | 11555                 | adrenergic receptor, beta 2                                                     |
| 47 1450843_a_at | 3.55        | Serpinh1           | 12406                 | serine (or cysteine) peptidase inhibitor, clade H, member 1                     |
| 48 1459740_s_at | 3.55        | Ucp2               | 22228                 | uncoupling protein 2 (mitochondrial, proton carrier)                            |
| 49 1428933_at   | 3.53        | Hdac8              | 70315                 | histone deacetylase 8                                                           |
| 50 1451148_at   | 3.52        | LOC100047214 /// F | 100047214 /// 68943   | similar to PTEN induced putative kinase 1                                       |
| 51 1422743_at   | 3.48        | Phka1              | 18679                 | phosphorylase kinase alpha 1                                                    |
| 52 1454009_at   | 3.45        | 1700008O03Rik      | 69349                 | RIKEN cDNA 1700008O03 gene                                                      |
| 53 1438750_at   | 3.42        | Atrx               | 22589                 | alpha thalassemia/mental retardation syndrome X-linked homolog (human)          |
| 54 1448599_s_at | 3.39        | Miip               | 28010                 | migration and invasion inhibitory protein                                       |
| 55 1426241_a_at | 3.38        | Scmh1              | 29871                 | sex comb on midleg homolog 1                                                    |
| 56 1435069_at   | 3.35        | BC064078           | 408064                | cDNA sequence BC064078                                                          |
| 57 1425601_a_at | 3.34        | Rtkn               | 20166                 | rhotekin                                                                        |
| 58 1430538_at   | 3.28        | 2210013O21Rik      | 70123                 | RIKEN cDNA 2210013O21 gene                                                      |
| 59 1417116_at   | 3.26        | Slc6a8             | 102857                | solute carrier family 6 (neurotransmitter transporter, creatine), member 8      |
| 60 1422823_at   | 3.26        | Eps8 /// LOC63263ε | 13860 /// 632638      | epidermal growth factor receptor pathway substrate 8                            |
| 61 1434092_at   | 3.22        | Atg9b              | 213948                | ATG9 autophagy related 9 homolog B (S. cerevisiae)                              |
| 62 1416239_at   | 3.20        | Ass1               | 11898                 | argininosuccinate synthetase 1                                                  |
| 63 1455721_at   | 3.20        | Gspt2              | 14853                 | G1 to S phase transition 2                                                      |
| 64 1436200_at   | 3.19        | Lonrf3             | 74365                 | LON peptidase N-terminal domain and ring finger 3                               |

| Probe Set ID     | Fold change | Gene Symbol     | Entrez Gene     | Gene Description                                                                       |
|------------------|-------------|-----------------|-----------------|----------------------------------------------------------------------------------------|
| 65 1426466_s_at  | 3.19        | Rps6k1          | 238323          | ribosomal protein S6 kinase-like 1                                                     |
| 66 1418318_at    | 3.16        | Rnf128          | 66889           | ring finger protein 128                                                                |
| 67 1435514_at    | 3.14        | Lztf1           | 93730           | leucine zipper transcription factor-like 1; predicted gene 6776                        |
| 68 1449476_at    | 3.14        | Rage            | 26448           | renal tumor antigen                                                                    |
| 69 1447957_at    | 3.09        | D7Erd128e       | 52222           | DNA segment, Chr 7, ERATO Doi 128, expressed                                           |
| 70 1422711_a_at  | 3.08        | Pnck            | 93843           | pregnancy upregulated non-ubiquitously expressed CaM kinase                            |
| 71 1417850_at    | 3.04        | Rb1             | 19645           | retinoblastoma 1                                                                       |
| 72 1422744_at    | 3.02        | Phka1           | 18679           | phosphorylase kinase alpha 1                                                           |
| 73 1427564_at    | 3.02        | Diap2           | 54004           | diaphanous homolog 2 (Drosophila)                                                      |
| 74 1451169_at    | 3.02        | Nomo1           | 211548          | nodal modulator 1                                                                      |
| 75 1448330_at    | 3.01        | Gstm1           | 14862           | similar to Glutathione S-transferase Mu 1 (GST class-mu 1) (Glutathione S-trans        |
| 76 1455817_x_at  | 3.00        | Zxdb            | 668166          | zinc finger, X-linked, duplicated B                                                    |
| 77 1451269_at    | 2.99        | Pdzd11          | 72621           | PDZ domain containing 11                                                               |
| 78 1446583_at    | 2.97        |                 |                 |                                                                                        |
| 79 1449119_at    | 2.97        | Arih2           | 23807           | ariadne homolog 2 (Drosophila); predicted gene 12263                                   |
| 80 1437369_at    | 2.97        | Fgd1            | 14163           | FYVE, RhoGEF and PH domain containing 1                                                |
| 81 1460600_at    | 2.96        | AA414768        | 245350          | expressed sequence AA414768                                                            |
| 82 1453040_at    | 2.96        | Mcart6          | 67062           | mitochondrial carrier triple repeat 6                                                  |
| 83 1424838_at    | 2.95        | A330049M08Rik   | 230822          | RIKEN cDNA A330049M08 gene                                                             |
| 84 1450919_at    | 2.93        | Mpp1            | 17524           | membrane protein, palmitoylated                                                        |
| 85 1425068_a_at  | 2.91        | Tex264          | 21767           | testis expressed gene 264                                                              |
| 86 1444057_at    | 2.91        |                 |                 | UBX domain protein 4                                                                   |
| 87 1434493_at    | 2.91        | 1810022K09Rik   | 69126           | predicted gene 4540; RIKEN cDNA 1810022K09 gene                                        |
| 88 1421896_at    | 2.91        | Elk1            | 13712           | ELK1, member of ETS oncogene family                                                    |
| 89 1422327_s_at  | 2.90        | G6pd2 /// G6pdx | 14380 /// 14381 | glucose-6-phosphate dehydrogenase 2                                                    |
| 90 1437449_at    | 2.90        | Rsad1           | 237926          | radical S-adenosyl methionine domain containing 1                                      |
| 91 1444837_at    | 2.89        |                 |                 | Scm-like with four mbt domains 2                                                       |
| 92 1417393_a_at  | 2.88        | Fam132a         | 67389           | family with sequence similarity 132, member A                                          |
| 93 1418901_at    | 2.86        | Cebpb           | 12608           | CCAAT/enhancer binding protein (C/EBP), beta                                           |
| 94 1438065_at    | 2.83        | Rprd1a          | 225283          | regulation of nuclear pre-mRNA domain containing 1A                                    |
| 95 1437435_at    | 2.83        | 1700061G19Rik   | 78625           | RIKEN cDNA 1700061G19 gene                                                             |
| 96 1424322_at    | 2.81        | Apex2           | 77622           | apurinic/aprimidinic endonuclease 2                                                    |
| 97 1436347_a_at  | 2.81        | 5530601H04Rik   | 71445           | RIKEN cDNA 5530601H04 gene                                                             |
| 98 1433741_at    | 2.81        | Cd38            | 12494           | CD38 antigen                                                                           |
| 99 1434436_at    | 2.81        | Morc4           | 75746           | microchidia 4                                                                          |
| 100 1427844_a_at | 2.76        | Cebpb           | 12608           | CCAAT/enhancer binding protein (C/EBP), beta                                           |
| 101 1448524_s_at | 2.76        | Ssr4            | 20832           | signal sequence receptor, delta                                                        |
| 102 1428705_at   | 2.75        | 1700007K13Rik   | 69327           | RIKEN cDNA 1700007K13 gene                                                             |
| 103 1426863_at   | 2.75        | Rbmx            | 19655           | RNA binding motif protein, X chromosome                                                |
| 104 1417412_at   | 2.74        | F8a             | 14070           | factor 8-associated gene A                                                             |
| 105 1457313_at   | 2.73        | Ocrl            | 320634          | oculocerebrorenal syndrome of Lowe                                                     |
| 106 1455028_at   | 2.72        | Mapt            | 17762           | microtubule-associated protein tau                                                     |
| 107 1444585_at   | 2.70        | Adc             | 242669          | arginine decarboxylase                                                                 |
| 108 1435218_at   | 2.69        | Rasgef1a        | 70727           | RasGEF domain family, member 1A                                                        |
| 109 1439753_x_at | 2.69        | Six4            | 20474           | sine oculis-related homeobox 4 homolog (Drosophila)                                    |
| 110 1423436_at   | 2.68        | Gsta3           | 14859           | glutathione S-transferase, alpha 3                                                     |
| 111 1417357_at   | 2.67        | Emd             | 13726           | emerin                                                                                 |
| 112 1438671_at   | 2.66        | Ppp2r2c         | 269643          | protein phosphatase 2 (formerly 2A), regulatory subunit B (PR 52), gamma isofo         |
| 113 1416416_x_at | 2.66        | Gstm1           | 14862           | similar to Glutathione S-transferase Mu 1 (GST class-mu 1) (Glutathione S-trans        |
| 114 1441229_at   | 2.66        | D230019N24Rik   | 399607          | RIKEN cDNA D230019N24 gene                                                             |
| 115 1434681_at   | 2.66        | 4932441K18Rik   | 353170          | predicted gene 8258; similar to factor inhibiting activating transcription factor 4 (/ |
| 116 1451751_at   | 2.66        | Ddit4l          | 73284           | DNA-damage-inducible transcript 4-like                                                 |
| 117 1436780_at   | 2.65        | Ogt             | 108155          | O-linked N-acetylglucosamine (GlcNAc) transferase (UDP-N-acetylglucosamine             |
| 118 1436509_at   | 2.64        | Mlec            | 109154          | malectin                                                                               |
| 119 1439824_at   | 2.64        | Chm             | 12662           | similar to choroideremia; choroideremia                                                |
| 120 1419763_at   | 2.63        | Nkap            | 67050           | reproductive homeobox 3B; UPF3 regulator of nonsense transcripts homolog B             |
| 121 1448188_at   | 2.59        | Ucp2            | 22228           | uncoupling protein 2 (mitochondrial, proton carrier)                                   |
| 122 1450161_at   | 2.59        | Ikbg            | 16151           | inhibitor of kappaB kinase gamma                                                       |
| 123 1426025_s_at | 2.58        | Laptm5          | 16792           | lysosomal-associated protein transmembrane 5                                           |
| 124 1428654_at   | 2.57        | 1200016B10Rik   | 66875           | RIKEN cDNA 1200016B10 gene                                                             |
| 125 1439476_at   | 2.56        | Dsg2            | 13511           | desmoglein 2; similar to Dsg2 protein                                                  |
| 126 1417732_at   | 2.55        | Anxa8           | 11752           | annexin A8                                                                             |
| 127 1416032_at   | 2.54        | Tmem109         | 68539           | transmembrane protein 109                                                              |
| 128 1418237_s_at | 2.54        | Col18a1         | 12822           | collagen, type XVIII, alpha 1                                                          |
| 129 1417721_s_at | 2.53        | Laptm5          | 16792           | lysosomal-associated protein transmembrane 5                                           |
| 130 1453375_at   | 2.53        | 4930422N03Rik   | 76871           | RIKEN cDNA 4930422N03 gene                                                             |
| 131 1424286_at   | 2.53        | Prkx            | 19108           | protein kinase, X-linked                                                               |
| 132 1456504_at   | 2.52        | Zfp182          | 319535          | zinc finger protein 182                                                                |
| 133 1420922_at   | 2.52        | Usp9x           | 22284           | ubiquitin specific peptidase 9, X chromosome                                           |
| 134 1420433_at   | 2.51        | Taf7l           | 74469           | TAF7-like RNA polymerase II, TATA box binding protein (TBP)-associated factor          |

| Probe Set ID     | Fold change | Gene Symbol         | Entrez Gene          | Gene Description                                                                    |
|------------------|-------------|---------------------|----------------------|-------------------------------------------------------------------------------------|
| 135 1460471_at   | 2.50        | Ooep                | 67968                | oocyte expressed protein homolog (dog)                                              |
| 136 1432026_a_at | 2.50        | Herc5               | 67138                | hect domain and RLD 5                                                               |
| 137 1427235_at   | 2.49        | Kdm6a               | 22289                | 4lysine (K)-specific demethylase 6A                                                 |
| 138 1455111_at   | 2.49        | Yip6                | 77929                | similar to Yip1 domain family, member 6; Yip1 domain family, member 6               |
| 139 1441937_s_at | 2.49        | LOC100047214 /// F  | 100047214 /// 68943  | similar to PTEN induced putative kinase 1                                           |
| 140 1431856_a_at | 2.48        | C1qtnf6             | 72709                | C1q and tumor necrosis factor related protein 6                                     |
| 141 1451884_a_at | 2.48        | Lsm2                | 27756                | LSM2 homolog, U6 small nuclear RNA associated (S. cerevisiae)                       |
| 142 1455198_a_at | 2.48        | Ppp2r3a             | 19054                | protein phosphatase 2 (formerly 2A), regulatory subunit B", alpha; RIKEN cDNA       |
| 143 1416397_at   | 2.48        | Mesdc1              | 80889                | mesoderm development candidate 1                                                    |
| 144 1430975_at   | 2.47        | 8430416G17Rik       | 71469                | RIKEN cDNA 8430416G17 gene                                                          |
| 145 1456716_s_at | 2.47        | 3110002H16Rik       | 76482                | RIKEN cDNA 3110002H16 gene                                                          |
| 146 1449046_a_at | 2.47        | Josd2               | 66124                | Josephin domain containing 2                                                        |
| 147 1448645_at   | 2.46        | Msl3                | 17692                | male-specific lethal 3 homolog (Drosophila)                                         |
| 148 1435458_at   | 2.46        | Pim1                | 18712                | proviral integration site 1                                                         |
| 149 1444500_at   | 2.46        | Ahsa1               | 217737               | AHA1, activator of heat shock protein ATPase homolog 1 (yeast)                      |
| 150 1460579_at   | 2.45        | Dnpep               | 13437                | aspartyl aminopeptidase                                                             |
| 151 1456609_at   | 2.44        | Camk2n1             | 66259                | calcium/calmodulin-dependent protein kinase II inhibitor 1                          |
| 152 1434424_at   | 2.43        | Mfsd7b              | 226844               | major facilitator superfamily domain containing 7B                                  |
| 153 1452859_at   | 2.43        | 1200016B10Rik       | 66875                | RIKEN cDNA 1200016B10 gene                                                          |
| 154 1453091_s_at | 2.43        | Letmd1              | 68614                | LETM1 domain containing 1                                                           |
| 155 1445634_at   | 2.42        |                     |                      | microtubule-associated protein tau                                                  |
| 156 1431774_a_at | 2.41        | Lyrm1               | 73919                | LYR motif containing 1                                                              |
| 157 1419309_at   | 2.40        | Pdpn                | 14726                | podoplanin                                                                          |
| 158 1416155_at   | 2.40        | Hmgb3               | 15354                | predicted gene 11805; predicted gene 8850; high mobility group box 3; similar to    |
| 159 1445241_at   | 2.40        | Rab11fip4           | 268451               | RAB11 family interacting protein 4 (class II)                                       |
| 160 1438857_x_at | 2.40        | Irak1               | 16179                | interleukin-1 receptor-associated kinase 1                                          |
| 161 1448192_s_at | 2.38        | AU021838 /// Prps1  | 19139 /// 328099     | mirror-image polydactyly gene 1 homolog (human); phosphoribosyl pyrophosphi         |
| 162 1435452_at   | 2.38        | LOC100047579 /// T  | 100047579 /// 24066C | similar to transmembrane protein 20; transmembrane protein 20                       |
| 163 1436917_s_at | 2.37        | Gpsm1               | 67839                | G-protein signalling modulator 1 (AGS3-like, C. elegans)                            |
| 164 1455727_at   | 2.37        | Zrsr2               | 22184                | zinc finger (CCCH type), RNA binding motif and serine/arginine rich 2               |
| 165 1417099_at   | 2.36        | Ftsj1 /// LOC100044 | 100044636 /// 54632  | similar to Ftsj homolog; FtsJ homolog 1 (E. coli)                                   |
| 166 1435567_at   | 2.36        | Phka1               | 18679                | phosphorylase kinase alpha 1                                                        |
| 167 1457394_at   | 2.35        | 2900002K06Rik       | 70226                | RIKEN cDNA 2900002K06 gene                                                          |
| 168 1435051_at   | 2.35        | Wdr44               | 72404                | WD repeat domain 44                                                                 |
| 169 1458684_at   | 2.35        |                     |                      | similar to Ss18 protein; synovial sarcoma translocation, Chromosome 18              |
| 170 1421499_a_at | 2.35        | Ptpn14              | 19250                | protein tyrosine phosphatase, non-receptor type 14                                  |
| 171 1423228_at   | 2.34        | B4galt6             | 56386                | UDP-Gal:betaGlcNAc beta 1,4-galactosyltransferase, polypeptide 6; similar to B      |
| 172 1455784_at   | 2.34        | Sec1                | 56546                | secretory blood group 1                                                             |
| 173 1434263_at   | 2.34        | F630110N24Rik       | 73822                | RIKEN cDNA F630110N24 gene                                                          |
| 174 1419206_at   | 2.34        | Cd37                | 12493                | CD37 antigen                                                                        |
| 175 1448354_at   | 2.34        | G6pdx               | 14381                | glucose-6-phosphate dehydrogenase X-linked                                          |
| 176 1416865_at   | 2.34        | Fgd1                | 14163                | FYVE, RhoGEF and PH domain containing 1                                             |
| 177 1446234_at   | 2.34        |                     |                      | 4lysine (K)-specific demethylase 6A                                                 |
| 178 1423660_at   | 2.33        | Ctdsp2 /// ENSMUS   | 100043719 /// 52468  | predicted gene 9770                                                                 |
| 179 1434061_at   | 2.33        | Rp2h                | 19889                | retinitis pigmentosa 2 homolog (human)                                              |
| 180 1437495_at   | 2.33        | Mbtps2 /// Yy2      | 100073351 /// 27066S | membrane-bound transcription factor peptidase, site 2; similar to zinc finger, X-li |
| 181 1434849_at   | 2.33        | Tspyl2              | 52808                | TSPY-like 2                                                                         |
| 182 1448419_at   | 2.33        | Pop4                | 66161                | processing of precursor 4, ribonuclease P/MRP family, (S. cerevisiae)               |
| 183 1451611_at   | 2.33        | Pla2g16             | 225845               | phospholipase A2, group XVI                                                         |
| 184 1416052_at   | 2.32        | Prps1               | 19139                | mirror-image polydactyly gene 1 homolog (human); phosphoribosyl pyrophosphi         |
| 185 1426955_at   | 2.32        | Col18a1             | 12822                | collagen, type XVIII, alpha 1                                                       |
| 186 1426484_at   | 2.31        | Ubxn4               | 67812                | UBX domain protein 4                                                                |
| 187 1423451_at   | 2.31        | Pgrmc1              | 53328                | progesterone receptor membrane component 1                                          |
| 188 1417637_a_at | 2.31        | Hmg20b              | 15353                | high mobility group 20 B                                                            |
| 189 1432205_a_at | 2.30        | C130038G02Rik       | 77521                | RIKEN cDNA C130038G02 gene                                                          |
| 190 1439201_at   | 2.30        | Usp14               | 59025                | ubiquitin specific peptidase 14                                                     |
| 191 1436541_at   | 2.29        | 2310008H09Rik       | 66356                | RIKEN cDNA 2310008H09 gene                                                          |
| 192 1425516_at   | 2.29        | Ogt                 | 108155               | O-linked N-acetylglucosamine (GlcNAc) transferase (UDP-N-acetylglucosamine          |
| 193 1434360_s_at | 2.29        | LOC632664 /// Pptr  | 19270 /// 632664     | protein tyrosine phosphatase, receptor type, G; similar to protein tyrosine phospl  |
| 194 1449740_s_at | 2.28        | Dsg2                | 13511                | desmoglein 2; similar to Dsg2 protein                                               |
| 195 1454082_a_at | 2.28        | Giyd2               | 75764                | GIY-YIG domain containing 2                                                         |
| 196 1448371_at   | 2.28        | Mylpf               | 17907                | myosin light chain, phosphorylatable, fast skeletal muscle                          |
| 197 1424236_at   | 2.27        | Tbc1d10b            | 68449                | TBC1 domain family, member 10b                                                      |
| 198 1433913_at   | 2.27        | C80913              | 19777                | expressed sequence C80913                                                           |
| 199 1448908_at   | 2.27        | Ppap2b              | 67916                | phosphatidic acid phosphatase type 2B                                               |
| 200 1460177_at   | 2.27        | Cndp2               | 66054                | CNDP dipeptidase 2 (metallopeptidase M20 family)                                    |
| 201 1460649_at   | 2.27        | Irak1               | 16179                | interleukin-1 receptor-associated kinase 1                                          |
| 202 1456279_a_at | 2.26        | Bcap31              | 27061                | B-cell receptor-associated protein 31                                               |
| 203 1428357_at   | 2.25        | 2610019F03Rik       | 72148                | RIKEN cDNA 2610019F03 gene                                                          |
| 204 1437780_at   | 2.25        | Fancc               | 237211               | Fanconi anemia, complementation group B                                             |

| Probe Set ID     | Fold change | Gene Symbol        | Entrez Gene         | Gene Description                                                                    |
|------------------|-------------|--------------------|---------------------|-------------------------------------------------------------------------------------|
| 205 1454787_at   | 2.25        | Zdhhc9             | 208884              | similar to zinc finger, DHHC domain containing 9; zinc finger, DHHC domain con      |
| 206 1418397_at   | 2.23        | Zfp275             | 27081               | zinc finger protein 275                                                             |
| 207 1451302_at   | 2.23        | 1110012L19Rik      | 68618               | RIKEN cDNA 1110012L19 gene; predicted gene 8512                                     |
| 208 1431228_s_at | 2.22        | 4930526115Rik      | 75135               | RIKEN cDNA 4930526115 gene                                                          |
| 209 1450995_at   | 2.22        | Folr1              | 14275               | folate receptor 1 (adult)                                                           |
| 210 1439064_at   | 2.22        | BC030046           | 277154              | cDNA sequence BC030046                                                              |
| 211 1422616_s_at | 2.22        | Wdr54              | 75659               | WD repeat domain 54                                                                 |
| 212 1448269_a_at | 2.21        | Klhl13             | 67455               | kelch-like 13 (Drosophila)                                                          |
| 213 1423122_at   | 2.20        | Avpi1              | 69534               | arginine vasopressin-induced 1                                                      |
| 214 1445693_at   | 2.20        | Araf               | 11836               | v-raf murine sarcoma 3611 viral oncogene homolog                                    |
| 215 1448772_at   | 2.20        | Ube2a              | 22209               | ubiquitin-conjugating enzyme E2A, RAD6 homolog (S. cerevisiae)                      |
| 216 1460169_a_at | 2.20        | Pctk1              | 18555               | PCTAIRE-motif protein kinase 1                                                      |
| 217 1444390_at   | 2.20        | Prdm14             | 383491              | PR domain containing 14                                                             |
| 218 1448118_a_at | 2.19        | Ctsd               | 13033               | cathepsin D                                                                         |
| 219 1424124_at   | 2.19        | Mospd2             | 76763               | motile sperm domain containing 2                                                    |
| 220 1420725_at   | 2.19        | Tmlhe              | 192289              | trimethyllysine hydroxylase, epsilon                                                |
| 221 1450264_a_at | 2.18        | Chka               | 12660               | choline kinase alpha                                                                |
| 222 1434518_at   | 2.18        | Phka2              | 110094              | phosphorylase kinase alpha 2                                                        |
| 223 1440344_at   | 2.18        | Snord89            | 100217461           | small nucleolar RNA, C/D box 89                                                     |
| 224 1431044_at   | 2.18        | Thoc1              | 225160              | THO complex 1                                                                       |
| 225 1438843_x_at | 2.17        | Mtch2              | 56428               | mitochondrial carrier homolog 2 (C. elegans); predicted gene, 100039384; predi      |
| 226 1454816_at   | 2.17        | Rp2h               | 19889               | retinitis pigmentosa 2 homolog (human)                                              |
| 227 1415956_a_at | 2.17        | Pctk1              | 18555               | PCTAIRE-motif protein kinase 1                                                      |
| 228 1429400_at   | 2.16        | Clcn5              | 12728               | chloride channel 5                                                                  |
| 229 1424224_at   | 2.16        | Asb8               | 78541               | ankyrin repeat and SOCS box-containing 8                                            |
| 230 1453895_at   | 2.16        | C330026N13Rik      | 78531               | RIKEN cDNA C330026N13 gene                                                          |
| 231 1426734_at   | 2.15        | Fam43a             | 224093              | family with sequence similarity 43, member A                                        |
| 232 1426497_at   | 2.15        | Kdm5c              | 20591               | lysine (K)-specific demethylase 5C                                                  |
| 233 1423978_at   | 2.14        | Sbk1               | 104175              | SH3-binding kinase 1                                                                |
| 234 1451070_at   | 2.14        | Gdi1               | 14567               | guanosine diphosphate (GDP) dissociation inhibitor 1                                |
| 235 1456981_at   | 2.14        | Tmc7               | 209760              | transmembrane channel-like gene family 7; similar to Tmc7 protein                   |
| 236 1455247_at   | 2.13        | Amotl1             | 75723               | angiomin-like 1                                                                     |
| 237 1452800_a_at | 2.13        | Apoo               | 68316               | similar to Novel transmembrane domain containing protein; apolipoprotein O          |
| 238 1451299_at   | 2.13        | Prkx               | 19108               | protein kinase, X-linked                                                            |
| 239 1430449_at   | 2.13        | Kidins220          | 77480               | kinase D-interacting substrate 220                                                  |
| 240 1430215_at   | 2.13        | 2610020H08Rik      | 434234              | RIKEN cDNA 2610020H08 gene                                                          |
| 241 1450107_a_at | 2.12        | Renbp              | 19703               | renin binding protein                                                               |
| 242 1435860_at   | 2.12        | Slc5a6             | 330064              | solute carrier family 5 (sodium-dependent vitamin transporter), member 6            |
| 243 1422965_at   | 2.11        | Agtrap             | 11610               | angiotensin II, type 1 receptor-associated protein                                  |
| 244 1424167_a_at | 2.11        | Pmm1               | 29858               | phosphomannomutase 1                                                                |
| 245 1423662_at   | 2.11        | Atp6ap2            | 70495               | ATPase, H+ transporting, lysosomal accessory protein 2                              |
| 246 1420909_at   | 2.11        | Vegfa              | 22339               | vascular endothelial growth factor A                                                |
| 247 1438270_at   | 2.11        | Al846148           | 68229               | expressed sequence Al846148                                                         |
| 248 1427573_at   | 2.11        | Chic1              | 12212               | cysteine-rich hydrophobic domain 1                                                  |
| 249 1458358_at   | 2.11        | Pank2              | 74450               | pantothenate kinase 2 (Hallervorden-Spatz syndrome)                                 |
| 250 1436905_x_at | 2.11        | Laptm5             | 16792               | lysosomal-associated protein transmembrane 5                                        |
| 251 1421797_a_at | 2.10        | Snx12              | 55988               | sorting nexin 12                                                                    |
| 252 1428334_at   | 2.10        | Ostm1              | 14628               | osteopetrosis associated transmembrane protein 1                                    |
| 253 1450038_s_at | 2.10        | Usp9x              | 22284               | ubiquitin specific peptidase 9, X chromosome                                        |
| 254 1439631_at   | 2.09        | Zcchc11            | 230594              | zinc finger, CCHC domain containing 11                                              |
| 255 1448668_a_at | 2.09        | Irak1              | 16179               | interleukin-1 receptor-associated kinase 1                                          |
| 256 1426410_at   | 2.08        | Pdk3               | 236900              | pyruvate dehydrogenase kinase, isoenzyme 3                                          |
| 257 1441391_at   | 2.07        |                    |                     | guanine nucleotide binding protein (G protein), beta polypeptide 1-like; similar to |
| 258 1449622_s_at | 2.07        | Atp6ap1            | 54411               | ATPase, H+ transporting, lysosomal accessory protein 1                              |
| 259 1426306_a_at | 2.07        | LOC100046560 /// \ | 100046560 /// 80884 | similar to melanoma antigen family D, 2; melanoma antigen, family D, 2              |
| 260 1457316_at   | 2.07        | Mtap6              | 17760               | microtubule-associated protein 6                                                    |
| 261 1417442_a_at | 2.06        | Pex3               | 56535               | peroxisomal biogenesis factor 3                                                     |
| 262 1451049_at   | 2.05        | Bcap31             | 27061               | B-cell receptor-associated protein 31                                               |
| 263 1435008_at   | 2.05        | Slc9a6             | 236794              | solute carrier family 9 (sodium/hydrogen exchanger), member 6                       |
| 264 1424106_at   | 2.05        | 1200003C05Rik      | 104771              | RIKEN cDNA 1200003C05 gene                                                          |
| 265 1423661_s_at | 2.04        | Ctdsp2 /// ENSMUS  | 100043719 /// 52468 | predicted gene 9770                                                                 |
| 266 1435566_s_at | 2.04        | Araf               | 11836               | v-raf murine sarcoma 3611 viral oncogene homolog                                    |
| 267 1451400_at   | 2.04        | Gemin8             | 237221              | similar to gem (nuclear organelle) associated protein 8; predicted gene 5455; ge    |
| 268 1428773_s_at | 2.04        | Bcor               | 71458               | BCL6 interacting corepressor                                                        |
| 269 1432158_a_at | 2.04        | Trappc2            | 66226               | similar to Chain A, The Crystal Structure Of The Bet3-Trs31-Sedlin Complex; tra     |
| 270 1449916_at   | 2.02        | Pbx4               | 80720               | pre-B-cell leukemia homeobox 4                                                      |
| 271 1432011_at   | 2.02        | 2900052L18Rik      | 76835               | predicted gene 4407; RIKEN cDNA 2900052L18 gene                                     |
| 272 1434908_at   | 2.02        | Scaf1              | 233208              | SR-related CTD-associated factor 1                                                  |
| 273 1441970_at   | 2.02        | E430010N07Rik      | 399572              | RIKEN cDNA E430010N07 gene                                                          |
| 274 1429776_a_at | 2.02        | Dnajb6             | 23950               | DnaJ (Hsp40) homolog, subfamily B, member 6; predicted gene 5917; predictec         |
| 275 1425525_a_at | 2.01        | P2rx4              | 18438               | purinergic receptor P2X, ligand-gated ion channel 4                                 |
| 276 1436300_at   | 2.01        | Dsty               | 213452              | dual serine/threonine and tyrosine protein kinase                                   |
| 277 1430780_a_at | 2.01        | Pmm1               | 29858               | phosphomannomutase 1                                                                |

## Downregulated genes in haploid vs diploid ES cells

| Probe Set ID    | Fold change | Gene Symbol      | Entrez Gene        | Gene Description                                                                |
|-----------------|-------------|------------------|--------------------|---------------------------------------------------------------------------------|
| 1 1417210_at    | -46.94      | Eif2s3y          | 26908              | eukaryotic translation initiation factor 2, subunit 3, structural gene Y-linked |
| 2 1443621_at    | -34.01      | Xaf1             | 327959             | XIAP associated factor 1                                                        |
| 3 1426438_at    | -32.17      | Ddx3y            | 26900              | DEAD (Asp-Glu-Ala-Asp) box polypeptide 3, Y-linked                              |
| 4 1445226_at    | -23.48      | BC023969         | 407828             | cDNA sequence BC023969                                                          |
| 5 1452077_at    | -21.18      | Ddx3y            | 26900              | DEAD (Asp-Glu-Ala-Asp) box polypeptide 3, Y-linked                              |
| 6 1427302_at    | -12.31      | Enpp3            | 209558             | ectonucleotide pyrophosphatase/phosphodiesterase 3                              |
| 7 1416371_at    | -10.48      | Apod             | 11815              | apolipoprotein D                                                                |
| 8 1437721_at    | -9.30       | Coro1c           | 23790              | coronin, actin binding protein 1C; predicted gene 5790                          |
| 9 1438833_at    | -9.18       | Casc5            | 76464              | cancer susceptibility candidate 5                                               |
| 10 1415949_at   | -8.97       | Cpe // LOC100046 | 100046434 // 12876 | carboxypeptidase E; similar to carboxypeptidase E                               |
| 11 1438933_x_at | -7.94       | Rasgrp2          | 19395              | RAS, guanyl releasing protein 2                                                 |
| 12 1415897_a_at | -7.72       | Mgst1            | 56615              | microsomal glutathione S-transferase 1                                          |
| 13 1437671_x_at | -6.76       | Prss23           | 76453              | protease, serine, 23                                                            |
| 14 1450857_a_at | -6.55       | Col1a2           | 12843              | collagen, type I, alpha 2                                                       |
| 15 1423110_at   | -6.45       | Col1a2           | 12843              | collagen, type I, alpha 2                                                       |
| 16 1417461_at   | -6.33       | Cap1             | 12331              | CAP, adenylate cyclase-associated protein 1 (yeast)                             |
| 17 1426598_at   | -6.23       | Uty              | 22290              | ubiquitously transcribed tetratricopeptide repeat gene, Y chromosome            |
| 18 1439757_s_at | -6.02       | Epha4            | 13838              | Eph receptor A4                                                                 |
| 19 1452384_at   | -5.96       | Enpp3            | 209558             | ectonucleotide pyrophosphatase/phosphodiesterase 3                              |
| 20 1417462_at   | -5.72       | Cap1             | 12331              | CAP, adenylate cyclase-associated protein 1 (yeast)                             |
| 21 1439555_at   | -5.52       | Rlf              | 109263             | rearranged L-myc fusion sequence                                                |
| 22 1433542_at   | -5.44       | Inpp5f           | 101490             | inositol polyphosphate-5-phosphatase F                                          |
| 23 1451260_at   | -5.18       | Aldh1b1          | 72535              | aldehyde dehydrogenase 1 family, member B1                                      |
| 24 1460616_at   | -5.11       | Slco4c1          | 227394             | solute carrier organic anion transporter family, member 4C1                     |
| 25 1433783_at   | -5.07       | Ldb3             | 24131              | LIM domain binding 3                                                            |
| 26 1425538_x_at | -4.56       | Ceacam1          | 26365              | carcinoembryonic antigen-related cell adhesion molecule 1; carcinoembryonic a   |
| 27 1432075_a_at | -4.49       | Tekt1            | 21689              | tektin 1                                                                        |
| 28 1431057_a_at | -4.47       | Prss23           | 76453              | protease, serine, 23                                                            |
| 29 1416008_at   | -4.24       | Satb1            | 20230              | special AT-rich sequence binding protein 1                                      |
| 30 1448123_s_at | -4.16       | Tgfb1            | 21810              | transforming growth factor, beta induced                                        |
| 31 1421929_at   | -4.10       | Epha4            | 13838              | Eph receptor A4                                                                 |
| 32 1426108_s_at | -4.09       | Cacnb1           | 12295              | calcium channel, voltage-dependent, beta 1 subunit                              |
| 33 1423505_at   | -4.05       | Tagln            | 21345              | transgelin                                                                      |
| 34 1435836_at   | -3.90       | Pdk1             | 228026             | pyruvate dehydrogenase kinase, isoenzyme 1                                      |
| 35 1427630_x_at | -3.74       | Ceacam1          | 26365              | carcinoembryonic antigen-related cell adhesion molecule 1; carcinoembryonic a   |
| 36 1438403_s_at | -3.72       | Malat1           | 72289              | metastasis associated lung adenocarcinoma transcript 1 (non-coding RNA)         |
| 37 1429509_at   | -3.72       | Lsm12            | 268490             | LSM12 homolog (S. cerevisiae)                                                   |
| 38 1449071_at   | -3.69       | Myl7             | 17898              | myosin, light polypeptide 7, regulatory                                         |
| 39 1421100_a_at | -3.62       | Dab1             | 13131              | disabled homolog 1 (Drosophila)                                                 |
| 40 1418188_a_at | -3.52       | Malat1           | 72289              | metastasis associated lung adenocarcinoma transcript 1 (non-coding RNA)         |
| 41 1420989_at   | -3.51       | 4933411K20Rik    | 66756              | RIKEN cDNA 4933411K20 gene                                                      |
| 42 1418189_s_at | -3.50       | Malat1           | 72289              | metastasis associated lung adenocarcinoma transcript 1 (non-coding RNA)         |
| 43 1423162_s_at | -3.45       | Spred1           | 114715             | sprouty protein with EVH-1 domain 1, related sequence                           |
| 44 1418617_x_at | -3.44       | Clgn             | 12745              | calmegin                                                                        |
| 45 1423184_at   | -3.35       | Itsn2            | 20403              | intersectin 2                                                                   |
| 46 1444616_x_at | -3.33       |                  |                    | C-type lectin domain family 2, member e                                         |
| 47 1434447_at   | -3.25       | Met              | 17295              | met proto-oncogene                                                              |
| 48 1450494_x_at | -3.24       | Ceacam1          | 26365              | carcinoembryonic antigen-related cell adhesion molecule 1; carcinoembryonic a   |
| 49 1424130_a_at | -3.23       | Ptrf             | 19285              | polymerase I and transcript release factor                                      |
| 50 1429021_at   | -3.23       | Epha4            | 13838              | Eph receptor A4                                                                 |
| 51 1417780_at   | -3.21       | Lass4            | 67260              | LAG1 homolog, ceramide synthase 4                                               |
| 52 1427311_at   | -3.17       | Bptf             | 207165             | bromodomain PHD finger transcription factor                                     |
| 53 1416612_at   | -3.17       | Cyp1b1           | 13078              | cytochrome P450, family 1, subfamily b, polypeptide 1                           |
| 54 1417141_at   | -3.16       | Igtp             | 16145              | interferon gamma induced GTPase                                                 |
| 55 1456120_at   | -3.15       | Secisbp2l        | 70354              | SECIS binding protein 2-like                                                    |
| 56 1429778_at   | -3.12       | Optn             | 71648              | optineurin                                                                      |
| 57 1427998_at   | -3.10       | Lsm12            | 268490             | LSM12 homolog (S. cerevisiae)                                                   |
| 58 1435679_at   | -3.08       | Optn             | 71648              | optineurin                                                                      |
| 59 1421129_a_at | -3.05       | Atp2a3           | 53313              | ATPase, Ca++ transporting, ubiquitous                                           |
| 60 1458539_at   | -2.95       | R3hdm1           | 226412             | R3H domain 1 (binds single-stranded nucleic acids)                              |
| 61 1457936_at   | -2.93       | Mapk8            | 26419              | mitogen-activated protein kinase 8                                              |
| 62 1439882_at   | -2.92       | Sec23ip          | 207352             | Sec23 interacting protein                                                       |
| 63 1424598_at   | -2.87       | Ddx6             | 13209              | DEAD (Asp-Glu-Ala-Asp) box polypeptide 6                                        |
| 64 1450647_at   | -2.87       | Hps3             | 12807              | Hermansky-Pudlak syndrome 3 homolog (human)                                     |
| 65 1438200_at   | -2.87       | Sulf1            | 240725             | sulfatase 1                                                                     |
| 66 1450839_at   | -2.85       | D0H4S114         | 27528              | DNA segment, human D4S114                                                       |

| Probe Set ID | Fold change  | Gene Symbol              | Entrez Gene         | Gene Description                                                             |
|--------------|--------------|--------------------------|---------------------|------------------------------------------------------------------------------|
| 67           | 1429183_at   | -2.84 Pkp2               | 67451               | plakophilin 2                                                                |
| 68           | 1447680_at   | -2.83 Anp32e             | 66471               | acidic (leucine-rich) nuclear phosphoprotein 32 family, member E             |
| 69           | 1456697_x_at | -2.80 Dmtf1              | 23857               | cyclin D binding myb-like transcription factor 1                             |
| 70           | 1440146_at   | -2.78 Vps13a             | 271564              | vacuolar protein sorting 13A (yeast)                                         |
| 71           | 1450068_at   | -2.77 Baz1b              | 22385               | bromodomain adjacent to zinc finger domain, 1B                               |
| 72           | 1417220_at   | -2.76 Fah                | 14085               | fumarylacetoacetate hydrolase                                                |
| 73           | 1424657_at   | -2.74 Taok1              | 216965              | TAO kinase 1                                                                 |
| 74           | 1448300_at   | -2.73 Mgst3              | 66447               | microsomal glutathione S-transferase 3                                       |
| 75           | 1449799_s_at | -2.72 Pkp2               | 67451               | plakophilin 2                                                                |
| 76           | 1433809_at   | -2.70 Ddx5               | 13207               | DEAD (Asp-Glu-Ala-Asp) box polypeptide 5; predicted gene 12183               |
| 77           | 1458332_x_at | -2.69 Sox4               | 20677               | SRY-box containing gene 19; SRY-box containing gene 4                        |
| 78           | 1418197_at   | -2.66 Ucp1               | 22227               | uncoupling protein 1 (mitochondrial, proton carrier)                         |
| 79           | 1436319_at   | -2.65 Sulf1              | 240725              | sulfatase 1                                                                  |
| 80           | 1452330_a_at | -2.63 Mxra8              | 74761               | matrix-remodelling associated 8                                              |
| 81           | 1427456_at   | -2.63 Wdfy3              | 72145               | WD repeat and FYVE domain containing 3                                       |
| 82           | 1436311_at   | -2.61 Gemin5             | 216766              | gem (nuclear organelle) associated protein 5                                 |
| 83           | 1437117_at   | -2.61 Centb1             | 216859              | centaurin, beta 1                                                            |
| 84           | 1430240_a_at | -2.60 Clgn               | 12745               | calmegin                                                                     |
| 85           | 1443778_at   | -2.57 Sox4               | 20677               | SRY-box containing gene 19; SRY-box containing gene 4                        |
| 86           | 1424703_at   | -2.53 Hemk1              | 69536               | HemK methyltransferase family member 1                                       |
| 87           | 1423066_at   | -2.53 Dnmt3a             | 13435               | DNA methyltransferase 3A                                                     |
| 88           | 1416105_at   | -2.52 Nnt                | 18115               | nicotinamide nucleotide transhydrogenase                                     |
| 89           | 1436020_at   | -2.52 Zfp828             | 101994              | zinc finger protein 828                                                      |
| 90           | 1438708_x_at | -2.51 Ywhab              | 54401               | tyrosine 3-monooxygenase/tryptophan 5-monooxygenase activation protein, beta |
| 91           | 1448632_at   | -2.50 Psmb10             | 19171               | proteasome (prosome, macropain) subunit, beta type 10                        |
| 92           | 1427261_at   | -2.49 Wwc1               | 211652              | WW, C2 and coiled-coil domain containing 1                                   |
| 93           | 1439150_x_at | -2.49 Grp1               | 66790               | GH regulated TBC protein 1                                                   |
| 94           | 1434140_at   | -2.49 Mcf2l              | 17207               | mcf.2 transforming sequence-like                                             |
| 95           | 1453293_a_at | -2.48 2810408A11Rik      | 70419               | RIKEN cDNA 2810408A11 gene                                                   |
| 96           | 1421005_at   | -2.48 Cep110             | 26920               | centrosomal protein 110                                                      |
| 97           | 1427231_at   | -2.46 Robo1              | 19876               | roundabout homolog 1 (Drosophila)                                            |
| 98           | 1443787_x_at | -2.45 Casp14             | 12365               | caspase 14                                                                   |
| 99           | 1455608_at   | -2.44 Sclt1              | 67161               | sodium channel and clathrin linker 1                                         |
| 100          | 1433730_at   | -2.44 Elmod2             | 244548              | ELMO domain containing 2                                                     |
| 101          | 1439995_at   | -2.41 Nhedc2             | 97086               | Na <sup>+</sup> /H <sup>+</sup> exchanger domain containing 2                |
| 102          | 1421928_at   | -2.40 EphA4              | 13838               | Eph receptor A4                                                              |
| 103          | 1449311_at   | -2.38 Bach1              | 12013               | BTB and CNC homology 1                                                       |
| 104          | 1424658_at   | -2.37 Taok1              | 216965              | TAO kinase 1                                                                 |
| 105          | 1452115_a_at | -2.36 Plk4               | 20873               | polo-like kinase 4 (Drosophila)                                              |
| 106          | 1425205_at   | -2.34 Ddx19b             | 234733              | DEAD (Asp-Glu-Ala-Asp) box polypeptide 19b                                   |
| 107          | 1427950_at   | -2.34 Rnf160             | 78913               | ring finger protein 160                                                      |
| 108          | 1437248_at   | -2.34 2700049A03Rik      | 76967               | RIKEN cDNA 2700049A03 gene                                                   |
| 109          | 1431215_at   | -2.30 Dnajc6             | 72685               | DnaJ (Hsp40) homolog, subfamily C, member 6                                  |
| 110          | 1418524_at   | -2.28 Pcm1               | 18536               | pericentriolar material 1                                                    |
| 111          | 1455604_at   | -2.27 Fzd5               | 14367               | frizzled homolog 5 (Drosophila)                                              |
| 112          | 1443971_x_at | -2.27 Mpp7               | 75739               | membrane protein, palmitoylated 7 (MAGUK p55 subfamily member 7)             |
| 113          | 1453172_at   | -2.27 Hspa13             | 110920              | heat shock protein 70 family, member 13                                      |
| 114          | 1451117_a_at | -2.27 Tom1l1             | 71943               | target of myb1-like 1 (chicken)                                              |
| 115          | 1420410_at   | -2.27 Nr5a2              | 26424               | nuclear receptor subfamily 5, group A, member 2                              |
| 116          | 1431672_at   | -2.27 9430069107Rik      | 77358               | RIKEN cDNA 9430069107 gene                                                   |
| 117          | 1418947_at   | -2.27 Nek3               | 23954               | NIMA (never in mitosis gene a)-related expressed kinase 3                    |
| 118          | 1444749_at   | -2.26                    |                     | apolipoprotein D                                                             |
| 119          | 1456863_at   | -2.25 EphA4              | 13838               | Eph receptor A4                                                              |
| 120          | 1452497_a_at | -2.25 Nfatc3             | 18021               | nuclear factor of activated T-cells, cytoplasmic, calcineurin-dependent 3    |
| 121          | 1460291_at   | -2.25 Cdk6               | 12571               | cyclin-dependent kinase 6                                                    |
| 122          | 1419642_at   | -2.24 Purb               | 19291               | purine rich element binding protein B                                        |
| 123          | 1453562_a_at | -2.23 NmrA1              | 67824               | NmrA-like family domain containing 1                                         |
| 124          | 1435155_at   | -2.23 Cgn                | 70737               | cingulin; cDNA sequence BC021767                                             |
| 125          | 1432282_a_at | -2.23 Tlcd2              | 380712              | TLC domain containing 2                                                      |
| 126          | 1450093_s_at | -2.23 Zbtb7a             | 16969               | zinc finger and BTB domain containing 7a                                     |
| 127          | 1419240_at   | -2.23 Tex14              | 83560               | testis expressed gene 14                                                     |
| 128          | 1455905_at   | -2.21 2610507B11Rik      | 72503               | RIKEN cDNA 2610507B11 gene                                                   |
| 129          | 1449058_at   | -2.21 Gli1               | 14632               | GLI-Kruppel family member GLI1                                               |
| 130          | 1452670_at   | -2.21 Myl9               | 98932               | myosin, light polypeptide 9, regulatory                                      |
| 131          | 1419350_at   | -2.19 Hook2              | 170833              | hook homolog 2 (Drosophila)                                                  |
| 132          | 1422546_at   | -2.19 Ilf3               | 16201               | interleukin enhancer binding factor 3                                        |
| 133          | 1430530_s_at | -2.15 NmrA1              | 67824               | NmrA-like family domain containing 1                                         |
| 134          | 1416688_at   | -2.15 Snap91             | 20616               | synaptosomal-associated protein 91                                           |
| 135          | 1447752_x_at | -2.15 Drg1               | 13494               | developmentally regulated GTP binding protein 1                              |
| 136          | 1426753_at   | -2.14 Phf17              | 269424              | PHD finger protein 17                                                        |
| 137          | 1454849_x_at | -2.14 Clu /// LOC1000461 | 100046120 /// 12759 | similar to clusterin; clusterin                                              |
| 138          | 1425608_at   | -2.12 Dusp3              | 72349               | dual specificity phosphatase 3 (vaccinia virus phosphatase VH1-related)      |
| 139          | 1449126_at   | -2.11 Zfp90              | 22751               | zinc finger protein 90                                                       |
| 140          | 1416517_at   | -2.10 Pnpla6             | 50767               | patatin-like phospholipase domain containing 6                               |
| 141          | 1437224_at   | -2.10 Rtn4               | 68585               | reticulon 4                                                                  |
| 142          | 1416740_at   | -2.10 Col5a1             | 12831               | collagen, type V, alpha 1                                                    |
| 143          | 1428835_at   | -2.09 Myh14              | 71960               | myosin, heavy polypeptide 14                                                 |

| Probe Set ID     | Fold change | Gene Symbol | Entrez Gene | Gene Description                                                           |
|------------------|-------------|-------------|-------------|----------------------------------------------------------------------------|
| 144 1456819_at   | -2.09       | Nrn11       | 234700      | neuritin 1-like                                                            |
| 145 1430287_s_at | -2.08       | Hemk1       | 69536       | HemK methyltransferase family member 1                                     |
| 146 1428563_at   | -2.08       | Ddx10       | 77591       | DEAD (Asp-Glu-Ala-Asp) box polypeptide 10                                  |
| 147 1455998_at   | -2.08       | LOC667118   | 667118      | similar to Zinc finger BED domain containing protein 4                     |
| 148 1434279_at   | -2.08       |             |             | Fas (TNF receptor superfamily member 6)                                    |
| 149 1437213_at   | -2.07       | Nudt21      | 68219       | nudix (nucleoside diphosphate linked moiety X)-type motif 21               |
| 150 1415973_at   | -2.06       | Marcks      | 17118       | myristoylated alanine rich protein kinase C substrate                      |
| 151 1434362_at   | -2.06       |             |             | sterol O-acyltransferase 1                                                 |
| 152 1458361_at   | -2.05       | Dclre1c     | 227525      | DNA cross-link repair 1C, PSO2 homolog (S. cerevisiae)                     |
| 153 1436302_at   | -2.05       | Slc10a7     | 76775       | solute carrier family 10 (sodium/bile acid cotransporter family), member 7 |
| 154 1434177_at   | -2.05       | Ece1        | 230857      | endothelin converting enzyme 1                                             |
| 155 1436134_at   | -2.05       | Scn2b       | 72821       | sodium channel, voltage-gated, type II, beta                               |
| 156 1436893_a_at | -2.05       | Mar-07      | 57438       | membrane-associated ring finger (C3HC4) 7; similar to axotrophin           |
| 157 1428583_at   | -2.04       | Nufip2      | 68564       | nuclear fragile X mental retardation protein interacting protein 2         |
| 158 1416610_a_at | -2.03       | Clcn3       | 12725       | chloride channel 3                                                         |
| 159 1429886_at   | -2.02       | Rnf160      | 78913       | ring finger protein 160                                                    |
| 160 1447766_x_at | -2.01       | Limd2       | 67803       | similar to epithelial protein lost in neoplasm; LIM domain containing 2    |
| 161 1421142_s_at | -2.01       | Foxp1       | 108655      | forkhead box P1                                                            |
| 162 1450644_at   | -2.00       | Zfp361l     | 12192       | zinc finger protein 36, C3H type-like 1                                    |
